# Supplementary material for: A Pair of CoII Supramolecular Isomers Based on Flexible Bis-Pyridyl-Bis-Amide and Angular Dicarboxylate Ligands
Source: MDPI journal article supplement (doi:10.3390/molecules25010201), 2020-01-03

# checkCIF/PLATON report

Structure factors have been supplied for datablock(s) 1, 2

THIS REPORT IS FOR GUIDANCE ONLY. IF USED AS PART OF A REVIEW PROCEDURE FOR PUBLICATION, IT SHOULD NOT REPLACE THE EXPERTISE OF AN EXPERIENCED CRYSTALLOGRAPHIC REFEREE.

No syntax errors found.      CIF dictionary      Interpreting this report

## Datablock: 1

---

Bond precision:    C-C = 0.0027 Å

Wavelength=0.71073

Cell:                a=9.1273(2)                b=12.0439(2)                c=12.0526(2)  
                      alpha=62.4993(8)    beta=75.9211(10)    gamma=79.9212(9)  
Temperature:    296 K

|                | Calculated         | Reported           |
|----------------|--------------------|--------------------|
| Volume         | 1136.88(4)         | 1136.88(4)         |
| Space group    | P -1               | P -1               |
| Hall group     | -P 1               | -P 1               |
| Moiety formula | C23 H19 Co N2 O7 S | ?                  |
| Sum formula    | C23 H19 Co N2 O7 S | C23 H19 Co N2 O7 S |
| Mr             | 526.39             | 526.39             |
| Dx,g cm-3      | 1.538              | 1.538              |
| Z              | 2                  | 2                  |
| Mu (mm-1)      | 0.895              | 0.895              |
| F000           | 540.0              | 540.0              |
| F000'          | 541.19             |                    |
| h,k,lmax       | 12,16,16           | 12,16,16           |
| Nref           | 5663               | 5647               |
| Tmin,Tmax      | 0.732,0.914        | 0.677,0.746        |
| Tmin'          | 0.692              |                    |

Correction method= # Reported T Limits: Tmin=0.677 Tmax=0.746  
AbsCorr = MULTI\_SCAN

Data completeness= 0.997

Theta(max)= 28.317

R(reflections)= 0.0293( 5131)

wR2(reflections)= 0.0815( 5647)

S = 1.038

Npar= 307

---

The following ALERTS were generated. Each ALERT has the format

**test-name\_ALERT\_alert-type\_alert-level.**

Click on the hyperlinks for more details of the test.

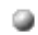

## Alert level G

|                   |                                                  |      |             |
|-------------------|--------------------------------------------------|------|-------------|
| PLAT004_ALERT_5_G | Polymeric Structure Found with Maximum Dimension | 1    | Info        |
| PLAT007_ALERT_5_G | Number of Unrefined Donor-H Atoms .....          | 1    | Report      |
| PLAT232_ALERT_2_G | Hirshfeld Test Diff (M-X) Co --O6_a .            | 6.8  | s.u.        |
| PLAT232_ALERT_2_G | Hirshfeld Test Diff (M-X) Co --O7_a .            | 20.3 | s.u.        |
| PLAT764_ALERT_4_G | Overcomplete CIF Bond List Detected (Rep/Expd) . | 1.17 | Ratio       |
| PLAT794_ALERT_5_G | Tentative Bond Valency for Co (II) .             | 1.89 | Info        |
| PLAT804_ALERT_5_G | Number of ARU-Code Packing Problem(s) in PLATON  | 1    | Info        |
| PLAT883_ALERT_1_G | No Info/Value for _atom_sites_solution_primary . |      | Please Do ! |
| PLAT912_ALERT_4_G | Missing # of FCF Reflections Above STh/L= 0.600  | 16   | Note        |
| PLAT978_ALERT_2_G | Number C-C Bonds with Positive Residual Density. | 15   | Info        |

- 0 **ALERT level A** = Most likely a serious problem - resolve or explain  
0 **ALERT level B** = A potentially serious problem, consider carefully  
0 **ALERT level C** = Check. Ensure it is not caused by an omission or oversight  
10 **ALERT level G** = General information/check it is not something unexpected

- 1 ALERT type 1 CIF construction/syntax error, inconsistent or missing data  
3 ALERT type 2 Indicator that the structure model may be wrong or deficient  
0 ALERT type 3 Indicator that the structure quality may be low  
2 ALERT type 4 Improvement, methodology, query or suggestion  
4 ALERT type 5 Informative message, check

## Datablock: 2

Bond precision: C-C = 0.0072 A

Wavelength=0.71073

Cell: a=9.2206(8) b=11.0642(10) c=13.3450(12)  
alpha=96.611(5) beta=109.696(5) gamma=103.697(5)  
Temperature: 296 K

|                | Calculated                                   | Reported              |
|----------------|----------------------------------------------|-----------------------|
| Volume         | 1216.7(2)                                    | 1216.73(19)           |
| Space group    | P -1                                         | P -1                  |
| Hall group     | -P 1                                         | -P 1                  |
| Moiety formula | 2(C23 H19 Co N2 O7 S), C<br>H3 O, 2(H O0.50) | ?                     |
| Sum formula    | C47 H43 Co2 N4 O16 S2                        | C23.50 H22 Co N2 O8 S |
| Mr             | 1101.83                                      | 551.42                |
| Dx,g cm-3      | 1.504                                        | 1.505                 |
| Z              | 1                                            | 2                     |
| Mu (mm-1)      | 0.842                                        | 0.842                 |
| F000           | 567.0                                        | 568.0                 |
| F000'          | 568.21                                       |                       |
| h,k,lmax       | 11,13,16                                     | 11,13,16              |
| Nref           | 4805                                         | 4661                  |
| Tmin,Tmax      | 0.845,0.959                                  | 0.641,0.746           |
| Tmin'          | 0.845                                        |                       |

Correction method= # Reported T Limits: Tmin=0.641 Tmax=0.746  
AbsCorr = MULTI\_SCAN

Data completeness= 0.970

Theta(max)= 25.999

R(reflections)= 0.0573( 3190)

wR2(reflections)= 0.1531( 4661)

S = 1.024

Npar= 321

---

The following ALERTS were generated. Each ALERT has the format

**test-name\_ALERT\_alert-type\_alert-level.**

Click on the hyperlinks for more details of the test.

---

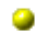

### Alert level C

|                   |                                                |                |         |              |
|-------------------|------------------------------------------------|----------------|---------|--------------|
| PLAT029_ALERT_3_C | _diffn_measured_fraction_theta_full            | value Low      | 0.972   | Why?         |
| PLAT041_ALERT_1_C | Calc. and Reported SumFormula                  | Strings Differ |         | Please Check |
| PLAT202_ALERT_3_C | Isotropic non-H Atoms in Anion/Solvent         | .....          | 1       | Check        |
|                   |                                                | 08             |         |              |
| PLAT230_ALERT_2_C | Hirshfeld Test Diff for                        | C3 --C4        | 5.5     | s.u.         |
| PLAT241_ALERT_2_C | High 'MainMol' Ueq as Compared to Neighbors of |                | 02      | Check        |
| PLAT242_ALERT_2_C | Low 'MainMol' Ueq as Compared to Neighbors of  |                | C7      | Check        |
| PLAT242_ALERT_2_C | Low 'MainMol' Ueq as Compared to Neighbors of  |                | C17     | Check        |
| PLAT309_ALERT_2_C | Single Bonded Oxygen (C-O > 1.3 Ang)           | .....          | 08      | Check        |
| PLAT334_ALERT_2_C | Small Aver. Benzene C-C Dist                   | C17 -C22       | 1.37    | Ang.         |
| PLAT341_ALERT_3_C | Low Bond Precision on C-C Bonds                | .....          | 0.00718 | Ang.         |
| PLAT413_ALERT_2_C | Short Inter XH3 .. XHn                         | H2B ..H24A     | 2.00    | Ang.         |
|                   |                                                | 1-x,1-y,2-z =  | 2_667   | Check        |
| PLAT911_ALERT_3_C | Missing FCF Refl Between Thmin & STh/L=        | 0.600          | 121     | Report       |

---

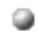

### Alert level G

FORMU01\_ALERT\_2\_G There is a discrepancy between the atom counts in the  
\_chemical\_formula\_sum and the formula from the \_atom\_site\* data.  
Atom count from \_chemical\_formula\_sum: C23.5 H22 Co1 N2 O8 S1  
Atom count from the \_atom\_site data: C23.5 H21.5 Co1 N2 O8 S1

CELLZ01\_ALERT\_1\_G Difference between formula and atom\_site contents detected.

CELLZ01\_ALERT\_1\_G WARNING: H atoms missing from atom site list. Is this intentional?

From the CIF: \_cell\_formula\_units\_Z 2  
From the CIF: \_chemical\_formula\_sum C23.50 H22 Co N2 O8 S  
TEST: Compare cell contents of formula and atom\_site data

| atom | Z*formula | cif sites | diff |
|------|-----------|-----------|------|
| C    | 47.00     | 47.00     | 0.00 |
| H    | 44.00     | 43.00     | 1.00 |
| Co   | 2.00      | 2.00      | 0.00 |
| N    | 4.00      | 4.00      | 0.00 |
| O    | 16.00     | 16.00     | 0.00 |
| S    | 2.00      | 2.00      | 0.00 |

|                   |                                                  |                |              |       |
|-------------------|--------------------------------------------------|----------------|--------------|-------|
| PLAT002_ALERT_2_G | Number of Distance or Angle Restraints on AtSite | 2              | Note         |       |
| PLAT004_ALERT_5_G | Polymeric Structure Found with Maximum Dimension | 2              | Info         |       |
| PLAT007_ALERT_5_G | Number of Unrefined Donor-H Atoms                | 3              | Report       |       |
| PLAT045_ALERT_1_G | Calculated and Reported Z Differ by a Factor ... | 0.50           | Check        |       |
| PLAT068_ALERT_1_G | Reported F000 Differs from Calcd (or Missing)... |                | Please Check |       |
| PLAT154_ALERT_1_G | The s.u.'s on the Cell Angles are Equal ..(Note) | 0.005          | Degree       |       |
| PLAT172_ALERT_4_G | The CIF-Embedded .res File Contains DFIX Records | 1              | Report       |       |
| PLAT300_ALERT_4_G | Atom Site Occupancy of C24                       | Constrained at | 0.5          | Check |
| PLAT300_ALERT_4_G | Atom Site Occupancy of H24A                      | Constrained at | 0.5          | Check |

|                   |                                                  |                |      |             |
|-------------------|--------------------------------------------------|----------------|------|-------------|
| PLAT300_ALERT_4_G | Atom Site Occupancy of H24B                      | Constrained at | 0.5  | Check       |
| PLAT300_ALERT_4_G | Atom Site Occupancy of H24C                      | Constrained at | 0.5  | Check       |
| PLAT300_ALERT_4_G | Atom Site Occupancy of O9                        | Constrained at | 0.5  | Check       |
| PLAT300_ALERT_4_G | Atom Site Occupancy of H9C                       | Constrained at | 0.5  | Check       |
| PLAT300_ALERT_4_G | Atom Site Occupancy of H9D                       | Constrained at | 0.5  | Check       |
| PLAT302_ALERT_4_G | Anion/Solvent/Minor-Residue Disorder (Resd 2 )   |                | 50%  | Note        |
| PLAT302_ALERT_4_G | Anion/Solvent/Minor-Residue Disorder (Resd 3 )   |                | 100% | Note        |
| PLAT794_ALERT_5_G | Tentative Bond Valency for Co (II) .             |                | 1.93 | Info        |
| PLAT804_ALERT_5_G | Number of ARU-Code Packing Problem(s) in PLATON  |                | 4    | Info        |
| PLAT860_ALERT_3_G | Number of Least-Squares Restraints .....         |                | 1    | Note        |
| PLAT883_ALERT_1_G | No Info/Value for _atom_sites_solution_primary . |                |      | Please Do ! |
| PLAT912_ALERT_4_G | Missing # of FCF Reflections Above STh/L= 0.600  |                | 24   | Note        |
| PLAT978_ALERT_2_G | Number C-C Bonds with Positive Residual Density. |                | 1    | Info        |

---

0 **ALERT level A** = Most likely a serious problem - resolve or explain  
0 **ALERT level B** = A potentially serious problem, consider carefully  
12 **ALERT level C** = Check. Ensure it is not caused by an omission or oversight  
25 **ALERT level G** = General information/check it is not something unexpected

7 ALERT type 1 CIF construction/syntax error, inconsistent or missing data  
10 ALERT type 2 Indicator that the structure model may be wrong or deficient  
5 ALERT type 3 Indicator that the structure quality may be low  
11 ALERT type 4 Improvement, methodology, query or suggestion  
4 ALERT type 5 Informative message, check

---

It is advisable to attempt to resolve as many as possible of the alerts in all categories. Often the minor alerts point to easily fixed oversights, errors and omissions in your CIF or refinement strategy, so attention to these fine details can be worthwhile. In order to resolve some of the more serious problems it may be necessary to carry out additional measurements or structure refinements. However, the purpose of your study may justify the reported deviations and the more serious of these should normally be commented upon in the discussion or experimental section of a paper or in the "special\_details" fields of the CIF. checkCIF was carefully designed to identify outliers and unusual parameters, but every test has its limitations and alerts that are not important in a particular case may appear. Conversely, the absence of alerts does not guarantee there are no aspects of the results needing attention. It is up to the individual to critically assess their own results and, if necessary, seek expert advice.

### Publication of your CIF in IUCr journals

A basic structural check has been run on your CIF. These basic checks will be run on all CIFs submitted for publication in IUCr journals (*Acta Crystallographica*, *Journal of Applied Crystallography*, *Journal of Synchrotron Radiation*); however, if you intend to submit to *Acta Crystallographica Section C* or *E* or *IUCrData*, you should make sure that full publication checks are run on the final version of your CIF prior to submission.

### Publication of your CIF in other journals

Please refer to the *Notes for Authors* of the relevant journal for any special instructions relating to CIF submission.

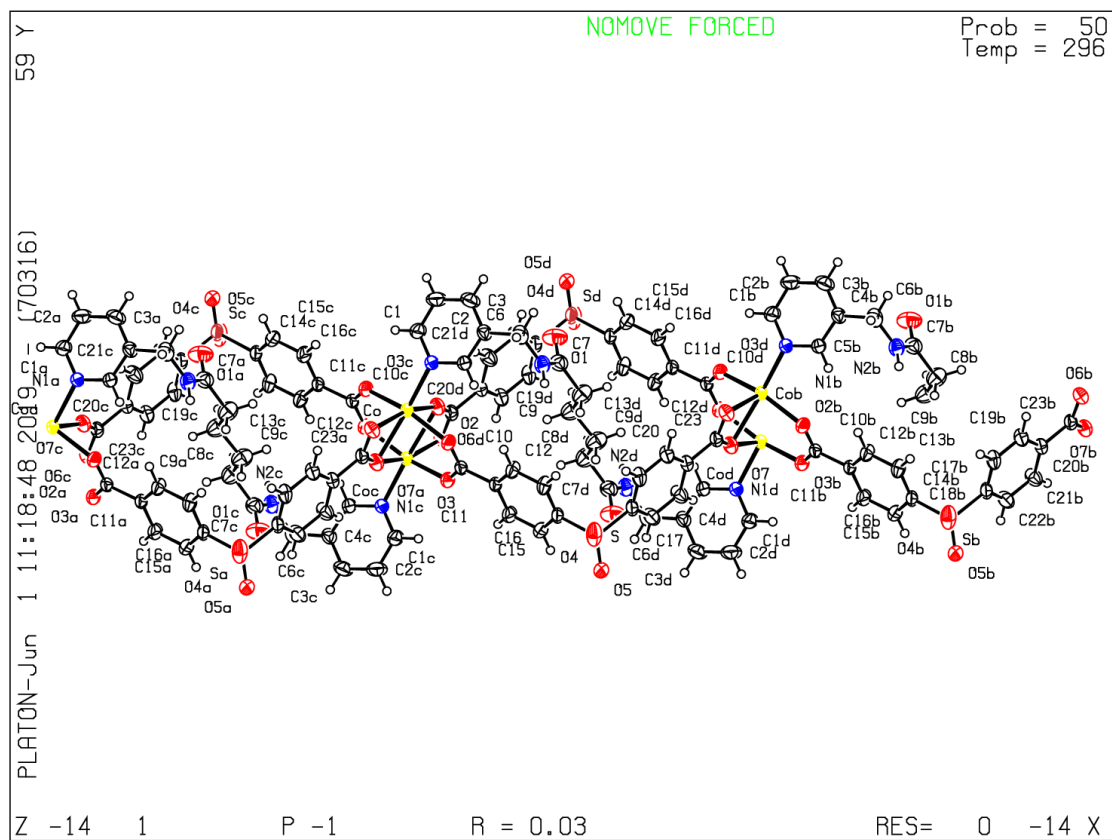

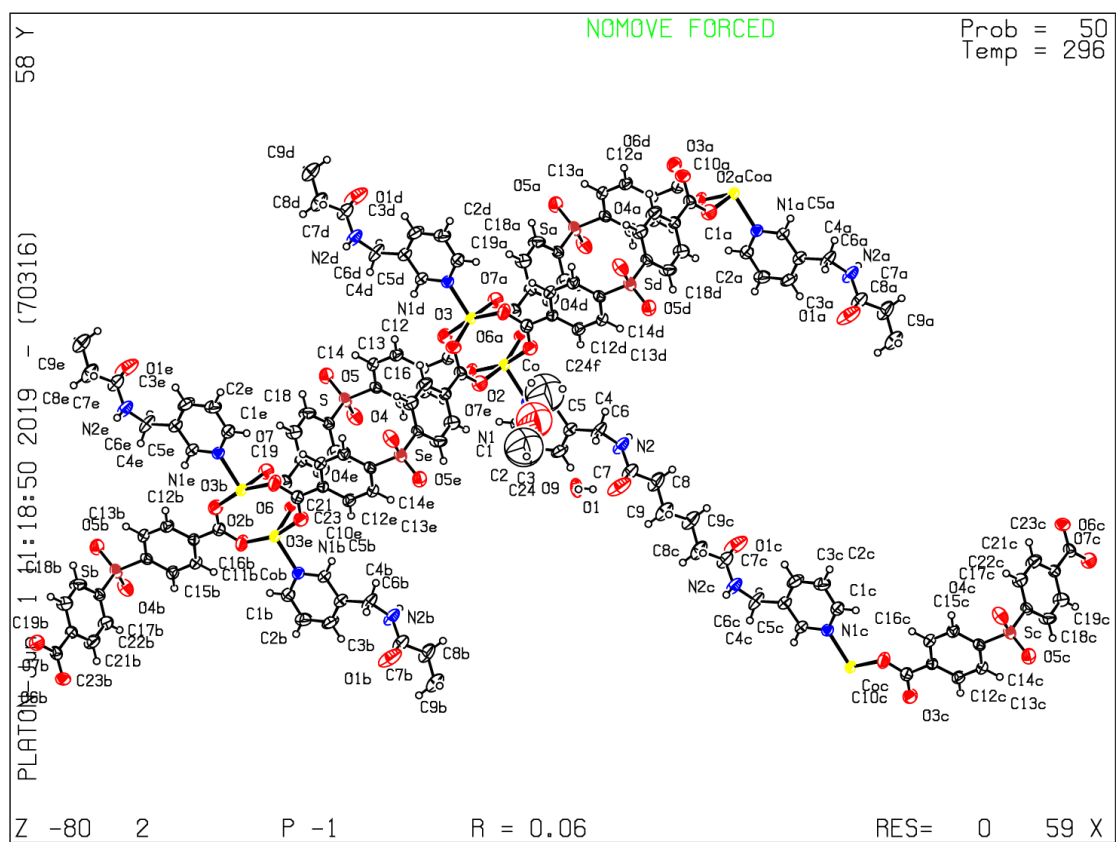

Supplement: s1 [file s1]
