# Supplementary material for: A Pair of CoII Supramolecular Isomers Based on Flexible Bis-Pyridyl-Bis-Amide and Angular Dicarboxylate Ligands
Source: Molecules. 2020 Jan 3;25(1):201. doi: 10.3390/molecules25010201 (PMC6982743; doi:10.3390/molecules25010201)
Supplement: Supplementary file 1 [file molecules-25-00201-s001.zip › allcif.cif]

 
data_1
  
_audit_creation_method            'SHELXL-2014/7' 
_shelx_SHELXL_version_number      '2014/7' 
_chemical_name_systematic         ? 
_chemical_name_common             ? 
_chemical_melting_point           ? 
_chemical_formula_moiety          ? 
_chemical_formula_sum 
 'C23 H19 Co N2 O7 S' 
_chemical_formula_weight          526.39 
  
loop_ 
 _atom_type_symbol 
 _atom_type_description 
 _atom_type_scat_dispersion_real 
 _atom_type_scat_dispersion_imag 
 _atom_type_scat_source 
 'C'  'C'   0.0033   0.0016 
 'International Tables Vol C Tables 4.2.6.8 and 6.1.1.4' 
 'H'  'H'   0.0000   0.0000 
 'International Tables Vol C Tables 4.2.6.8 and 6.1.1.4' 
 'N'  'N'   0.0061   0.0033 
 'International Tables Vol C Tables 4.2.6.8 and 6.1.1.4' 
 'O'  'O'   0.0106   0.0060 
 'International Tables Vol C Tables 4.2.6.8 and 6.1.1.4' 
 'S'  'S'   0.1246   0.1234 
 'International Tables Vol C Tables 4.2.6.8 and 6.1.1.4' 
 'Co'  'Co'   0.3494   0.9721 
 'International Tables Vol C Tables 4.2.6.8 and 6.1.1.4' 
  
_space_group_crystal_system       triclinic 
_space_group_IT_number            2 
_space_group_name_H-M_alt         'P -1' 
_space_group_name_Hall            '-P 1' 
  
_shelx_space_group_comment 
; 
The symmetry employed for this shelxl refinement is uniquely defined 
by the following loop, which should always be used as a source of 
symmetry information in preference to the above space-group names. 
They are only intended as comments. 
; 
  
loop_ 
 _space_group_symop_operation_xyz 
 'x, y, z' 
 '-x, -y, -z' 
  
_cell_length_a                    9.1273(2) 
_cell_length_b                    12.0439(2) 
_cell_length_c                    12.0526(2) 
_cell_angle_alpha                 62.4993(8) 
_cell_angle_beta                  75.9211(10) 
_cell_angle_gamma                 79.9212(9) 
_cell_volume                      1136.88(4) 
_cell_formula_units_Z             2 
_cell_measurement_temperature     296(2) 
_cell_measurement_reflns_used     9949 
_cell_measurement_theta_min       2.31 
_cell_measurement_theta_max       28.31 
  
_exptl_crystal_description        Plate 
_exptl_crystal_colour             red 
_exptl_crystal_density_meas       ? 
_exptl_crystal_density_method     ? 
_exptl_crystal_density_diffrn     1.538 
_exptl_crystal_F_000              540 
_exptl_transmission_factor_min    ? 
_exptl_transmission_factor_max    ? 
_exptl_crystal_size_max           0.400 
_exptl_crystal_size_mid           0.300 
_exptl_crystal_size_min           0.100 
_exptl_absorpt_coefficient_mu     0.895 
_shelx_estimated_absorpt_T_min    0.716 
_shelx_estimated_absorpt_T_max    0.916 
_exptl_absorpt_correction_type    multi_scan 
_exptl_absorpt_correction_T_min   0.6771 
_exptl_absorpt_correction_T_max   0.7457 
_exptl_absorpt_process_details     'SADABS V2008/1 (Bruker AXS, 2008)'    
_exptl_absorpt_special_details    ? 
_diffrn_ambient_temperature       296(2) 
_diffrn_radiation_wavelength      0.71073 
_diffrn_radiation_type            MoK\a 
_diffrn_source                    ? 
_diffrn_measurement_device_type   'Bruker APEX-II CCD' 
_diffrn_measurement_method        '\f and \w scans' 
_diffrn_detector_area_resol_mean  ? 
_diffrn_reflns_number             18493 
_diffrn_reflns_av_unetI/netI      0.0264 
_diffrn_reflns_av_R_equivalents   0.0301 
_diffrn_reflns_limit_h_min        -12 
_diffrn_reflns_limit_h_max        12 
_diffrn_reflns_limit_k_min        -16 
_diffrn_reflns_limit_k_max        16 
_diffrn_reflns_limit_l_min        -16 
_diffrn_reflns_limit_l_max        15 
_diffrn_reflns_theta_min          1.911 
_diffrn_reflns_theta_max          28.317 
_diffrn_reflns_theta_full         25.242 
_diffrn_measured_fraction_theta_max   0.997 
_diffrn_measured_fraction_theta_full  1.000 
_diffrn_reflns_Laue_measured_fraction_max    0.997 
_diffrn_reflns_Laue_measured_fraction_full   1.000 
_diffrn_reflns_point_group_measured_fraction_max   0.997 
_diffrn_reflns_point_group_measured_fraction_full  1.000 
_reflns_number_total              5647 
_reflns_number_gt                 5131 
_reflns_threshold_expression      'I > 2\s(I)' 
_reflns_Friedel_coverage          0.000 
_reflns_Friedel_fraction_max      . 
_reflns_Friedel_fraction_full     . 
  
_reflns_special_details 
; 
 Reflections were merged by SHELXL according to the crystal 
 class for the calculation of statistics and refinement. 
  
 _reflns_Friedel_fraction is defined as the number of unique 
 Friedel pairs measured divided by the number that would be 
 possible theoretically, ignoring centric projections and 
 systematic absences. 
; 
  
_computing_data_collection        'Bruker APEX2' 
_computing_cell_refinement        'Bruker SAINT' 
_computing_data_reduction         'Bruker SAINT' 
_computing_structure_solution     'SHELXS-97 (Sheldrick 2008)' 
_computing_structure_refinement 'SHELXL-2014/7 (Sheldrick, 2014)' 
_computing_molecular_graphics     'Bruker SHELXTL' 
_computing_publication_material   'Bruker SHELXTL' 
_refine_special_details           ? 
_refine_ls_structure_factor_coef  Fsqd 
_refine_ls_matrix_type            full 
_refine_ls_weighting_scheme       calc 
_refine_ls_weighting_details 
'w=1/[\s^2^(Fo^2^)+(0.0395P)^2^+0.4074P] where P=(Fo^2^+2Fc^2^)/3' 
_atom_sites_solution_primary      ? 
_atom_sites_solution_secondary    ? 
_atom_sites_solution_hydrogens    geom 
_refine_ls_hydrogen_treatment     constr 
_refine_ls_extinction_method      none 
_refine_ls_extinction_coef        . 
_refine_ls_number_reflns          5647 
_refine_ls_number_parameters      307 
_refine_ls_number_restraints      0 
_refine_ls_R_factor_all           0.0330 
_refine_ls_R_factor_gt            0.0293 
_refine_ls_wR_factor_ref          0.0815 
_refine_ls_wR_factor_gt           0.0787 
_refine_ls_goodness_of_fit_ref    1.038 
_refine_ls_restrained_S_all       1.038 
_refine_ls_shift/su_max           0.002 
_refine_ls_shift/su_mean          0.000 
  
loop_ 
 _atom_site_label 
 _atom_site_type_symbol 
 _atom_site_fract_x 
 _atom_site_fract_y 
 _atom_site_fract_z 
 _atom_site_U_iso_or_equiv 
 _atom_site_adp_type 
 _atom_site_occupancy 
 _atom_site_site_symmetry_order 
 _atom_site_calc_flag 
 _atom_site_refinement_flags_posn 
 _atom_site_refinement_flags_adp 
 _atom_site_refinement_flags_occupancy 
 _atom_site_disorder_assembly 
 _atom_site_disorder_group 
Co Co 0.59819(2) 0.57193(2) 0.51868(2) 0.02613(7) Uani 1 1 d . . . . . 
S S 1.28849(5) 0.07929(4) 0.29608(4) 0.03924(11) Uani 1 1 d . . . . . 
O1 O 1.0204(2) 0.80039(13) -0.00259(15) 0.0628(4) Uani 1 1 d . . . . . 
O2 O 0.75468(12) 0.44715(10) 0.48049(11) 0.0341(2) Uani 1 1 d . . . . . 
O3 O 0.60417(11) 0.33558(10) 0.45464(11) 0.0342(2) Uani 1 1 d . . . . . 
O4 O 1.39679(15) 0.07161(15) 0.36849(12) 0.0568(4) Uani 1 1 d . . . . . 
O5 O 1.24425(17) -0.03297(12) 0.30379(13) 0.0567(4) Uani 1 1 d . . . . . 
O6 O 1.61081(12) 0.49461(11) -0.28715(10) 0.0360(2) Uani 1 1 d . . . . . 
O7 O 1.46928(13) 0.40063(11) -0.33759(10) 0.0357(2) Uani 1 1 d . . . . . 
N1 N 0.72251(13) 0.72631(11) 0.40663(12) 0.0288(2) Uani 1 1 d . . . . . 
N2 N 1.13385(15) 0.68853(14) 0.16568(14) 0.0388(3) Uani 1 1 d . . . . . 
H2A H 1.1764 0.6176 0.2118 0.047 Uiso 1 1 calc R U . . . 
C1 C 0.65904(18) 0.84285(15) 0.37791(18) 0.0401(4) Uani 1 1 d . . . . . 
H1A H 0.5612 0.8539 0.4191 0.048 Uiso 1 1 calc R U . . . 
C2 C 0.7344(2) 0.94680(17) 0.2893(2) 0.0541(5) Uani 1 1 d . . . . . 
H2B H 0.6871 1.0268 0.2700 0.065 Uiso 1 1 calc R U . . . 
C3 C 0.8808(2) 0.93171(17) 0.22882(19) 0.0479(4) Uani 1 1 d . . . . . 
H3A H 0.9324 1.0013 0.1679 0.057 Uiso 1 1 calc R U . . . 
C4 C 0.94940(17) 0.81241(15) 0.25999(15) 0.0338(3) Uani 1 1 d . . . . . 
C5 C 0.86537(16) 0.71309(14) 0.34799(15) 0.0315(3) Uani 1 1 d . . . . . 
H5B H 0.9100 0.6322 0.3680 0.038 Uiso 1 1 calc R U . . . 
C6 C 1.11171(19) 0.79057(19) 0.20118(19) 0.0450(4) Uani 1 1 d . . . . . 
H6A H 1.1425 0.8669 0.1261 0.054 Uiso 1 1 calc R U . . . 
H6B H 1.1764 0.7726 0.2614 0.054 Uiso 1 1 calc R U . . . 
C7 C 1.0886(2) 0.70350(17) 0.06151(17) 0.0413(4) Uani 1 1 d . . . . . 
C8 C 1.1228(2) 0.5936(2) 0.0305(2) 0.0521(5) Uani 1 1 d . . . . . 
H8A H 1.1693 0.5240 0.0965 0.062 Uiso 1 1 calc R U . . . 
H8B H 1.1945 0.6158 -0.0492 0.062 Uiso 1 1 calc R U . . . 
C9 C 0.9823(2) 0.5533(2) 0.0195(2) 0.0530(5) Uani 1 1 d . . . . . 
H9A H 0.9326 0.6243 -0.0431 0.064 Uiso 1 1 calc R U . . . 
H9B H 0.9130 0.5265 0.1007 0.064 Uiso 1 1 calc R U . . . 
C10 C 0.73155(16) 0.36409(13) 0.45170(14) 0.0292(3) Uani 1 1 d . . . . . 
C11 C 0.86916(16) 0.29505(14) 0.40885(13) 0.0288(3) Uani 1 1 d . . . . . 
C12 C 1.01230(17) 0.33064(16) 0.39335(16) 0.0363(3) Uani 1 1 d . . . . . 
H12A H 1.0220 0.3986 0.4072 0.044 Uiso 1 1 calc R U . . . 
C13 C 1.14048(17) 0.26575(17) 0.35751(16) 0.0383(4) Uani 1 1 d . . . . . 
H13A H 1.2363 0.2893 0.3477 0.046 Uiso 1 1 calc R U . . . 
C14 C 1.12414(17) 0.16552(14) 0.33645(14) 0.0319(3) Uani 1 1 d . . . . . 
C15 C 0.98285(19) 0.12970(16) 0.34987(18) 0.0422(4) Uani 1 1 d . . . . . 
H15A H 0.9735 0.0626 0.3344 0.051 Uiso 1 1 calc R U . . . 
C16 C 0.85506(18) 0.19481(16) 0.38661(17) 0.0395(4) Uani 1 1 d . . . . . 
H16A H 0.7594 0.1710 0.3964 0.047 Uiso 1 1 calc R U . . . 
C17 C 1.35872(17) 0.17705(15) 0.13392(14) 0.0336(3) Uani 1 1 d . . . . . 
C18 C 1.44413(19) 0.27511(18) 0.10304(15) 0.0402(4) Uani 1 1 d . . . . . 
H18A H 1.4663 0.2892 0.1667 0.048 Uiso 1 1 calc R U . . . 
C19 C 1.49605(18) 0.35196(17) -0.02404(15) 0.0373(3) Uani 1 1 d . . . . . 
H19A H 1.5526 0.4188 -0.0462 0.045 Uiso 1 1 calc R U . . . 
C20 C 1.46386(16) 0.32952(15) -0.11813(14) 0.0310(3) Uani 1 1 d . . . . . 
C21 C 1.3784(2) 0.23104(18) -0.08571(16) 0.0433(4) Uani 1 1 d . . . . . 
H21A H 1.3568 0.2163 -0.1491 0.052 Uiso 1 1 calc R U . . . 
C22 C 1.3247(2) 0.15414(17) 0.04168(16) 0.0434(4) Uani 1 1 d . . . . . 
H22A H 1.2667 0.0881 0.0641 0.052 Uiso 1 1 calc R U . . . 
C23 C 1.51801(16) 0.41308(14) -0.25590(14) 0.0304(3) Uani 1 1 d . . . . . 
  
loop_ 
 _atom_site_aniso_label 
 _atom_site_aniso_U_11 
 _atom_site_aniso_U_22 
 _atom_site_aniso_U_33 
 _atom_site_aniso_U_23 
 _atom_site_aniso_U_13 
 _atom_site_aniso_U_12 
Co 0.02127(10) 0.02631(11) 0.02675(11) -0.01067(8) 0.00082(7) -0.00213(7) 
S 0.0384(2) 0.0360(2) 0.02576(18) -0.00853(16) 0.00353(15) 0.01201(16) 
O1 0.0836(11) 0.0382(7) 0.0623(9) -0.0112(7) -0.0312(8) -0.0011(7) 
O2 0.0261(5) 0.0332(6) 0.0420(6) -0.0197(5) -0.0005(4) 0.0014(4) 
O3 0.0239(5) 0.0338(6) 0.0421(6) -0.0181(5) 0.0011(4) -0.0011(4) 
O4 0.0448(7) 0.0732(10) 0.0336(6) -0.0170(6) -0.0096(5) 0.0259(7) 
O5 0.0703(9) 0.0309(6) 0.0453(7) -0.0124(6) 0.0159(6) 0.0035(6) 
O6 0.0328(5) 0.0393(6) 0.0306(5) -0.0111(5) -0.0018(4) -0.0076(5) 
O7 0.0369(6) 0.0408(6) 0.0258(5) -0.0120(5) -0.0045(4) -0.0039(5) 
N1 0.0261(6) 0.0278(6) 0.0305(6) -0.0124(5) -0.0017(5) -0.0035(5) 
N2 0.0282(6) 0.0450(8) 0.0412(7) -0.0195(6) -0.0021(5) -0.0023(6) 
C1 0.0303(7) 0.0328(8) 0.0515(10) -0.0176(7) -0.0012(7) -0.0002(6) 
C2 0.0441(10) 0.0265(8) 0.0752(14) -0.0123(9) -0.0049(9) -0.0004(7) 
C3 0.0444(10) 0.0334(9) 0.0528(11) -0.0085(8) -0.0008(8) -0.0133(7) 
C4 0.0301(7) 0.0374(8) 0.0345(8) -0.0164(7) -0.0002(6) -0.0103(6) 
C5 0.0269(7) 0.0298(7) 0.0362(8) -0.0149(6) -0.0014(6) -0.0031(5) 
C6 0.0310(8) 0.0559(11) 0.0535(10) -0.0304(9) 0.0058(7) -0.0171(7) 
C7 0.0385(8) 0.0393(9) 0.0447(9) -0.0165(8) -0.0052(7) -0.0084(7) 
C8 0.0518(11) 0.0536(11) 0.0609(12) -0.0323(10) -0.0151(9) -0.0008(9) 
C9 0.0488(10) 0.0501(11) 0.0704(13) -0.0327(10) -0.0186(10) 0.0000(8) 
C10 0.0252(6) 0.0275(7) 0.0274(7) -0.0093(6) 0.0010(5) 0.0004(5) 
C11 0.0254(6) 0.0287(7) 0.0260(7) -0.0103(6) 0.0000(5) 0.0019(5) 
C12 0.0283(7) 0.0419(9) 0.0433(9) -0.0257(7) -0.0031(6) 0.0015(6) 
C13 0.0244(7) 0.0504(10) 0.0438(9) -0.0270(8) -0.0029(6) 0.0023(6) 
C14 0.0297(7) 0.0322(7) 0.0240(6) -0.0100(6) 0.0017(5) 0.0057(6) 
C15 0.0383(8) 0.0365(8) 0.0521(10) -0.0261(8) 0.0061(7) -0.0041(7) 
C16 0.0286(7) 0.0402(9) 0.0499(10) -0.0248(8) 0.0044(7) -0.0051(6) 
C17 0.0294(7) 0.0370(8) 0.0251(7) -0.0114(6) 0.0021(5) 0.0038(6) 
C18 0.0390(8) 0.0550(10) 0.0297(8) -0.0228(8) -0.0003(6) -0.0071(7) 
C19 0.0353(8) 0.0461(9) 0.0321(8) -0.0194(7) 0.0017(6) -0.0118(7) 
C20 0.0270(7) 0.0366(8) 0.0258(7) -0.0128(6) -0.0002(5) -0.0032(6) 
C21 0.0537(10) 0.0487(10) 0.0292(8) -0.0154(7) -0.0039(7) -0.0183(8) 
C22 0.0494(10) 0.0442(9) 0.0335(8) -0.0139(7) 0.0017(7) -0.0179(8) 
C23 0.0250(6) 0.0340(7) 0.0270(7) -0.0115(6) -0.0015(5) 0.0006(5) 
  
_geom_special_details 
; 
 All esds (except the esd in the dihedral angle between two l.s. planes) 
 are estimated using the full covariance matrix.  The cell esds are taken 
 into account individually in the estimation of esds in distances, angles 
 and torsion angles; correlations between esds in cell parameters are only 
 used when they are defined by crystal symmetry.  An approximate (isotropic) 
 treatment of cell esds is used for estimating esds involving l.s. planes. 
; 
  
loop_ 
 _geom_bond_atom_site_label_1 
 _geom_bond_atom_site_label_2 
 _geom_bond_distance 
 _geom_bond_site_symmetry_2 
 _geom_bond_publ_flag 
Co O3 2.0192(10) 2_666 ? 
Co O2 2.0196(10) . ? 
Co N1 2.0597(12) . ? 
Co O6 2.1068(11) 1_456 ? 
Co O7 2.2734(11) 2_765 ? 
Co O7 2.2801(11) 1_456 ? 
Co C23 2.5100(15) 1_456 ? 
Co Co 2.9355(4) 2_666 ? 
S O5 1.4340(15) . ? 
S O4 1.4354(15) . ? 
S C14 1.7696(14) . ? 
S C17 1.7739(15) . ? 
O1 C7 1.222(2) . ? 
O2 C10 1.2632(18) . ? 
O3 C10 1.2567(18) . ? 
O3 Co 2.0192(10) 2_666 ? 
O6 C23 1.2719(19) . ? 
O6 Co 2.1068(11) 1_654 ? 
O7 C23 1.2500(19) . ? 
O7 Co 2.2734(11) 2_765 ? 
O7 Co 2.2802(11) 1_654 ? 
N1 C1 1.338(2) . ? 
N1 C5 1.3446(18) . ? 
N2 C7 1.340(2) . ? 
N2 C6 1.446(2) . ? 
N2 H2A 0.8600 . ? 
C1 C2 1.375(2) . ? 
C1 H1A 0.9300 . ? 
C2 C3 1.384(3) . ? 
C2 H2B 0.9300 . ? 
C3 C4 1.378(2) . ? 
C3 H3A 0.9300 . ? 
C4 C5 1.378(2) . ? 
C4 C6 1.514(2) . ? 
C5 H5B 0.9300 . ? 
C6 H6A 0.9700 . ? 
C6 H6B 0.9700 . ? 
C7 C8 1.499(3) . ? 
C8 C9 1.502(3) . ? 
C8 H8A 0.9700 . ? 
C8 H8B 0.9700 . ? 
C9 C9 1.520(4) 2_765 ? 
C9 H9A 0.9700 . ? 
C9 H9B 0.9700 . ? 
C10 C11 1.5004(19) . ? 
C11 C16 1.384(2) . ? 
C11 C12 1.389(2) . ? 
C12 C13 1.383(2) . ? 
C12 H12A 0.9300 . ? 
C13 C14 1.381(2) . ? 
C13 H13A 0.9300 . ? 
C14 C15 1.380(2) . ? 
C15 C16 1.386(2) . ? 
C15 H15A 0.9300 . ? 
C16 H16A 0.9300 . ? 
C17 C22 1.375(2) . ? 
C17 C18 1.384(2) . ? 
C18 C19 1.385(2) . ? 
C18 H18A 0.9300 . ? 
C19 C20 1.385(2) . ? 
C19 H19A 0.9300 . ? 
C20 C21 1.384(2) . ? 
C20 C23 1.499(2) . ? 
C21 C22 1.391(2) . ? 
C21 H21A 0.9300 . ? 
C22 H22A 0.9300 . ? 
C23 Co 2.5100(15) 1_654 ? 
  
loop_ 
 _geom_angle_atom_site_label_1 
 _geom_angle_atom_site_label_2 
 _geom_angle_atom_site_label_3 
 _geom_angle 
 _geom_angle_site_symmetry_1 
 _geom_angle_site_symmetry_3 
 _geom_angle_publ_flag 
O3 Co O2 160.23(5) 2_666 . ? 
O3 Co N1 97.76(5) 2_666 . ? 
O2 Co N1 96.07(5) . . ? 
O3 Co O6 92.04(5) 2_666 1_456 ? 
O2 Co O6 95.42(5) . 1_456 ? 
N1 Co O6 113.21(5) . 1_456 ? 
O3 Co O7 84.55(4) 2_666 2_765 ? 
O2 Co O7 82.14(4) . 2_765 ? 
N1 Co O7 86.96(5) . 2_765 ? 
O6 Co O7 159.82(4) 1_456 2_765 ? 
O3 Co O7 82.72(4) 2_666 1_456 ? 
O2 Co O7 85.19(4) . 1_456 ? 
N1 Co O7 173.31(4) . 1_456 ? 
O6 Co O7 60.11(4) 1_456 1_456 ? 
O7 Co O7 99.72(4) 2_765 1_456 ? 
O3 Co C23 85.41(5) 2_666 1_456 ? 
O2 Co C23 91.80(5) . 1_456 ? 
N1 Co C23 143.55(5) . 1_456 ? 
O6 Co C23 30.41(5) 1_456 1_456 ? 
O7 Co C23 129.42(5) 2_765 1_456 ? 
O7 Co C23 29.76(4) 1_456 1_456 ? 
O3 Co Co 80.09(3) 2_666 2_666 ? 
O2 Co Co 80.15(3) . 2_666 ? 
N1 Co Co 136.92(4) . 2_666 ? 
O6 Co Co 109.86(3) 1_456 2_666 ? 
O7 Co Co 49.96(3) 2_765 2_666 ? 
O7 Co Co 49.76(3) 1_456 2_666 ? 
C23 Co Co 79.48(4) 1_456 2_666 ? 
O5 S O4 120.11(9) . . ? 
O5 S C14 108.67(8) . . ? 
O4 S C14 107.27(8) . . ? 
O5 S C17 108.10(8) . . ? 
O4 S C17 107.45(8) . . ? 
C14 S C17 104.12(7) . . ? 
C10 O2 Co 126.67(9) . . ? 
C10 O3 Co 126.83(10) . 2_666 ? 
C23 O6 Co 92.60(9) . 1_654 ? 
C23 O7 Co 165.26(11) . 2_765 ? 
C23 O7 Co 85.35(9) . 1_654 ? 
Co O7 Co 80.28(4) 2_765 1_654 ? 
C1 N1 C5 117.86(13) . . ? 
C1 N1 Co 121.32(10) . . ? 
C5 N1 Co 120.36(10) . . ? 
C7 N2 C6 120.56(16) . . ? 
C7 N2 H2A 119.7 . . ? 
C6 N2 H2A 119.7 . . ? 
N1 C1 C2 121.87(15) . . ? 
N1 C1 H1A 119.1 . . ? 
C2 C1 H1A 119.1 . . ? 
C1 C2 C3 119.61(16) . . ? 
C1 C2 H2B 120.2 . . ? 
C3 C2 H2B 120.2 . . ? 
C4 C3 C2 119.24(16) . . ? 
C4 C3 H3A 120.4 . . ? 
C2 C3 H3A 120.4 . . ? 
C5 C4 C3 117.59(15) . . ? 
C5 C4 C6 120.91(15) . . ? 
C3 C4 C6 121.50(15) . . ? 
N1 C5 C4 123.79(14) . . ? 
N1 C5 H5B 118.1 . . ? 
C4 C5 H5B 118.1 . . ? 
N2 C6 C4 113.22(13) . . ? 
N2 C6 H6A 108.9 . . ? 
C4 C6 H6A 108.9 . . ? 
N2 C6 H6B 108.9 . . ? 
C4 C6 H6B 108.9 . . ? 
H6A C6 H6B 107.7 . . ? 
O1 C7 N2 121.70(17) . . ? 
O1 C7 C8 122.09(17) . . ? 
N2 C7 C8 116.20(16) . . ? 
C7 C8 C9 111.76(16) . . ? 
C7 C8 H8A 109.3 . . ? 
C9 C8 H8A 109.3 . . ? 
C7 C8 H8B 109.3 . . ? 
C9 C8 H8B 109.3 . . ? 
H8A C8 H8B 107.9 . . ? 
C8 C9 C9 111.9(2) . 2_765 ? 
C8 C9 H9A 109.2 . . ? 
C9 C9 H9A 109.2 2_765 . ? 
C8 C9 H9B 109.2 . . ? 
C9 C9 H9B 109.2 2_765 . ? 
H9A C9 H9B 107.9 . . ? 
O3 C10 O2 125.76(13) . . ? 
O3 C10 C11 117.63(13) . . ? 
O2 C10 C11 116.61(13) . . ? 
C16 C11 C12 119.60(14) . . ? 
C16 C11 C10 120.66(13) . . ? 
C12 C11 C10 119.73(14) . . ? 
C13 C12 C11 120.50(15) . . ? 
C13 C12 H12A 119.7 . . ? 
C11 C12 H12A 119.7 . . ? 
C14 C13 C12 119.06(15) . . ? 
C14 C13 H13A 120.5 . . ? 
C12 C13 H13A 120.5 . . ? 
C15 C14 C13 121.28(14) . . ? 
C15 C14 S 119.79(12) . . ? 
C13 C14 S 118.91(12) . . ? 
C14 C15 C16 119.24(15) . . ? 
C14 C15 H15A 120.4 . . ? 
C16 C15 H15A 120.4 . . ? 
C11 C16 C15 120.31(15) . . ? 
C11 C16 H16A 119.8 . . ? 
C15 C16 H16A 119.8 . . ? 
C22 C17 C18 121.61(14) . . ? 
C22 C17 S 118.75(13) . . ? 
C18 C17 S 119.63(12) . . ? 
C17 C18 C19 118.99(15) . . ? 
C17 C18 H18A 120.5 . . ? 
C19 C18 H18A 120.5 . . ? 
C20 C19 C18 120.12(15) . . ? 
C20 C19 H19A 119.9 . . ? 
C18 C19 H19A 119.9 . . ? 
C21 C20 C19 120.20(14) . . ? 
C21 C20 C23 119.30(14) . . ? 
C19 C20 C23 120.49(14) . . ? 
C20 C21 C22 120.00(16) . . ? 
C20 C21 H21A 120.0 . . ? 
C22 C21 H21A 120.0 . . ? 
C17 C22 C21 119.07(16) . . ? 
C17 C22 H22A 120.5 . . ? 
C21 C22 H22A 120.5 . . ? 
O7 C23 O6 121.65(14) . . ? 
O7 C23 C20 118.42(14) . . ? 
O6 C23 C20 119.93(13) . . ? 
O7 C23 Co 64.89(8) . 1_654 ? 
O6 C23 Co 56.98(8) . 1_654 ? 
C20 C23 Co 174.05(11) . 1_654 ? 
  
_refine_diff_density_max    0.374 
_refine_diff_density_min   -0.444 
_refine_diff_density_rms    0.052 
  
_shelx_res_file 
; 
  
    12038_0m.res created by SHELXL-2014/7 
  
  
TITL 12038_0m in P-1 
CELL 0.71073   9.12730  12.04390  12.05260  62.4993  75.9211  79.9212 
ZERR    2.00   0.00020   0.00020   0.00020   0.0008   0.0010   0.0009 
LATT  1 
SFAC C H N O S CO 
UNIT 46 38 4 14 2 2 
TEMP 23.000 
SIZE 0.10 0.30 0.40 
acta 
L.S. 8 
BOND  $H 
FMAP 2 
PLAN 20 
  
WGHT    0.039500    0.407400 
FVAR       0.18932 
CO    6    0.598187    0.571932    0.518677    11.00000    0.02127    0.02631 = 
         0.02675   -0.01067    0.00082   -0.00213 
S     5    1.288489    0.079289    0.296083    11.00000    0.03843    0.03601 = 
         0.02576   -0.00853    0.00353    0.01201 
O1    4    1.020394    0.800388   -0.002590    11.00000    0.08363    0.03815 = 
         0.06234   -0.01119   -0.03117   -0.00106 
O2    4    0.754685    0.447146    0.480485    11.00000    0.02605    0.03321 = 
         0.04200   -0.01974   -0.00054    0.00137 
O3    4    0.604169    0.335584    0.454643    11.00000    0.02395    0.03377 = 
         0.04209   -0.01805    0.00111   -0.00112 
O4    4    1.396789    0.071607    0.368493    11.00000    0.04475    0.07316 = 
         0.03363   -0.01699   -0.00960    0.02586 
O5    4    1.244246   -0.032969    0.303794    11.00000    0.07034    0.03086 = 
         0.04526   -0.01236    0.01594    0.00345 
O6    4    1.610812    0.494610   -0.287148    11.00000    0.03279    0.03927 = 
         0.03055   -0.01105   -0.00181   -0.00762 
O7    4    1.469280    0.400632   -0.337590    11.00000    0.03692    0.04080 = 
         0.02580   -0.01201   -0.00446   -0.00391 
N1    3    0.722511    0.726311    0.406634    11.00000    0.02613    0.02784 = 
         0.03047   -0.01236   -0.00169   -0.00346 
N2    3    1.133852    0.688527    0.165680    11.00000    0.02817    0.04500 = 
         0.04123   -0.01947   -0.00207   -0.00226 
AFIX  43 
H2A   2    1.176396    0.617625    0.211806    11.00000   -1.20000 
AFIX   0 
C1    1    0.659044    0.842848    0.377908    11.00000    0.03027    0.03276 = 
         0.05152   -0.01757   -0.00122   -0.00023 
AFIX  43 
H1A   2    0.561207    0.853854    0.419072    11.00000   -1.20000 
AFIX   0 
C2    1    0.734352    0.946800    0.289260    11.00000    0.04411    0.02653 = 
         0.07524   -0.01235   -0.00494   -0.00039 
AFIX  43 
H2B   2    0.687119    1.026800    0.270028    11.00000   -1.20000 
AFIX   0 
C3    1    0.880823    0.931706    0.228822    11.00000    0.04441    0.03337 = 
         0.05281   -0.00847   -0.00080   -0.01326 
AFIX  43 
H3A   2    0.932398    1.001287    0.167858    11.00000   -1.20000 
AFIX   0 
C4    1    0.949400    0.812407    0.259990    11.00000    0.03005    0.03743 = 
         0.03455   -0.01643   -0.00017   -0.01027 
C5    1    0.865367    0.713093    0.347994    11.00000    0.02688    0.02976 = 
         0.03621   -0.01493   -0.00142   -0.00305 
AFIX  43 
H5B   2    0.910028    0.632224    0.368004    11.00000   -1.20000 
AFIX   0 
C6    1    1.111715    0.790568    0.201179    11.00000    0.03096    0.05590 = 
         0.05354   -0.03038    0.00578   -0.01705 
AFIX  23 
H6A   2    1.142544    0.866856    0.126109    11.00000   -1.20000 
H6B   2    1.176409    0.772623    0.261385    11.00000   -1.20000 
AFIX   0 
C7    1    1.088636    0.703504    0.061513    11.00000    0.03850    0.03929 = 
         0.04467   -0.01646   -0.00517   -0.00837 
C8    1    1.122757    0.593578    0.030468    11.00000    0.05180    0.05357 = 
         0.06093   -0.03234   -0.01515   -0.00081 
AFIX  23 
H8A   2    1.169296    0.523971    0.096549    11.00000   -1.20000 
H8B   2    1.194498    0.615845   -0.049228    11.00000   -1.20000 
AFIX   0 
C9    1    0.982304    0.553319    0.019462    11.00000    0.04878    0.05009 = 
         0.07040   -0.03265   -0.01861   -0.00003 
AFIX  23 
H9A   2    0.932606    0.624312   -0.043121    11.00000   -1.20000 
H9B   2    0.912983    0.526486    0.100669    11.00000   -1.20000 
AFIX   0 
C10   1    0.731548    0.364089    0.451697    11.00000    0.02517    0.02746 = 
         0.02738   -0.00927    0.00100    0.00039 
C11   1    0.869164    0.295050    0.408849    11.00000    0.02541    0.02870 = 
         0.02604   -0.01031   -0.00001    0.00189 
C12   1    1.012298    0.330638    0.393346    11.00000    0.02828    0.04195 = 
         0.04330   -0.02568   -0.00307    0.00150 
AFIX  43 
H12A  2    1.022012    0.398632    0.407174    11.00000   -1.20000 
AFIX   0 
C13   1    1.140475    0.265752    0.357510    11.00000    0.02443    0.05037 = 
         0.04381   -0.02705   -0.00292    0.00230 
AFIX  43 
H13A  2    1.236317    0.289253    0.347724    11.00000   -1.20000 
AFIX   0 
C14   1    1.124143    0.165517    0.336450    11.00000    0.02975    0.03222 = 
         0.02397   -0.01004    0.00170    0.00566 
C15   1    0.982846    0.129700    0.349873    11.00000    0.03828    0.03647 = 
         0.05207   -0.02610    0.00610   -0.00415 
AFIX  43 
H15A  2    0.973482    0.062635    0.334444    11.00000   -1.20000 
AFIX   0 
C16   1    0.855057    0.194808    0.386608    11.00000    0.02863    0.04022 = 
         0.04989   -0.02478    0.00441   -0.00508 
AFIX  43 
H16A  2    0.759376    0.171040    0.396363    11.00000   -1.20000 
AFIX   0 
C17   1    1.358721    0.177055    0.133924    11.00000    0.02942    0.03697 = 
         0.02514   -0.01143    0.00209    0.00381 
C18   1    1.444126    0.275111    0.103044    11.00000    0.03904    0.05498 = 
         0.02974   -0.02285   -0.00033   -0.00705 
AFIX  43 
H18A  2    1.466303    0.289175    0.166655    11.00000   -1.20000 
AFIX   0 
C19   1    1.496052    0.351964   -0.024038    11.00000    0.03530    0.04611 = 
         0.03212   -0.01936    0.00174   -0.01177 
AFIX  43 
H19A  2    1.552633    0.418759   -0.046230    11.00000   -1.20000 
AFIX   0 
C20   1    1.463862    0.329518   -0.118133    11.00000    0.02700    0.03660 = 
         0.02581   -0.01276   -0.00020   -0.00324 
C21   1    1.378362    0.231040   -0.085713    11.00000    0.05375    0.04872 = 
         0.02918   -0.01537   -0.00395   -0.01834 
AFIX  43 
H21A  2    1.356786    0.216291   -0.149106    11.00000   -1.20000 
AFIX   0 
C22   1    1.324716    0.154138    0.041684    11.00000    0.04943    0.04418 = 
         0.03348   -0.01392    0.00165   -0.01794 
AFIX  43 
H22A  2    1.266653    0.088140    0.064144    11.00000   -1.20000 
AFIX   0 
C23   1    1.518010    0.413083   -0.255900    11.00000    0.02501    0.03395 = 
         0.02699   -0.01145   -0.00147    0.00062 
  
HKLF 4 
  
REM  12038_0m in P-1 
REM R1 =  0.0293 for    5131 Fo > 4sig(Fo)  and  0.0330 for all    5647 data 
REM    307 parameters refined using      0 restraints 
  
END 
  
WGHT      0.0395      0.4074 
  
REM Highest difference peak  0.374,  deepest hole -0.444,  1-sigma level  0.052 
Q1    1   1.3394  0.1177  0.3140  11.00000  0.05    0.37 
Q2    1   1.0924  0.5835 -0.0699  11.00000  0.05    0.32 
Q3    1   0.7987  0.3380  0.4202  11.00000  0.05    0.31 
Q4    1   1.3285  0.1412  0.2003  11.00000  0.05    0.27 
Q5    1   1.0491  0.5626  0.0631  11.00000  0.05    0.26 
Q6    1   1.0766  0.3006  0.3657  11.00000  0.05    0.26 
Q7    1   1.3005 -0.0036  0.3214  11.00000  0.05    0.25 
Q8    1   1.1979  0.1338  0.3151  11.00000  0.05    0.25 
Q9    1   1.4163  0.1389  0.3598  11.00000  0.05    0.25 
Q10   1   1.0554  0.1431  0.3664  11.00000  0.05    0.25 
Q11   1   0.9159  0.7647  0.3179  11.00000  0.05    0.25 
Q12   1   1.1139  0.8010 -0.0358  11.00000  0.05    0.24 
Q13   1   1.4760  0.3420 -0.0732  11.00000  0.05    0.24 
Q14   1   0.9241  0.1582  0.3836  11.00000  0.05    0.23 
Q15   1   1.1201  0.6601  0.0338  11.00000  0.05    0.22 
Q16   1   1.0203  0.7989  0.2360  11.00000  0.05    0.22 
Q17   1   1.4804  0.2968  0.0390  11.00000  0.05    0.22 
Q18   1   1.4787  0.3727 -0.1861  11.00000  0.05    0.21 
Q19   1   0.7936  0.7228  0.3740  11.00000  0.05    0.21 
Q20   1   0.7432  0.4084  0.4903  11.00000  0.05    0.20 
; 
_shelx_res_checksum   58003 
  
_shelx_hkl_file 
; 
  -1   0   0   32.13    1.15 
   1   0   0   31.59    1.15 
   1   0   0   32.91    1.14 
  -2   0   0   34.41    1.24 
  -2   0   0   36.07    1.23 
  -2   0   0   32.53    1.22 
   2   0   0   33.48    1.22 
   2   0   0   33.39    1.22 
  -3   0   0   14.66    0.55 
  -3   0   0   14.32    0.54 
  -3   0   0   14.75    0.58 
  -3   0   0   14.37    0.57 
   3   0   0   14.05    0.56 
   3   0   0   15.00    0.56 
  -4   0   0   44.96    1.63 
  -4   0   0   45.83    1.68 
  -4   0   0   45.77    1.67 
  -4   0   0   44.99    1.65 
   4   0   0   44.79    1.65 
   4   0   0   45.21    1.66 
  -5   0   0    1.92    0.18 
  -5   0   0    1.72    0.16 
  -5   0   0    1.70    0.12 
  -5   0   0    1.68    0.12 
   5   0   0    1.54    0.13 
   5   0   0    1.45    0.12 
  -6   0   0   24.84    1.00 
  -6   0   0   23.24    0.95 
  -6   0   0   24.60    0.92 
  -6   0   0   24.04    0.98 
   6   0   0   25.47    0.97 
   6   0   0   24.81    0.96 
  -7   0   0   47.83    1.82 
  -7   0   0   47.05    1.77 
  -7   0   0   46.99    1.80 
  -7   0   0   45.05    1.72 
   7   0   0   49.46    1.77 
   7   0   0   46.49    1.78 
  -8   0   0   45.43    1.81 
  -8   0   0   45.94    1.79 
  -8   0   0   45.59    1.70 
   8   0   0   48.01    1.76 
   8   0   0   45.37    1.77 
  -9   0   0   10.24    0.56 
  -9   0   0    9.74    0.45 
  -9   0   0    9.55    0.54 
   9   0   0   10.28    0.52 
 -10   0   0    6.64    0.45 
 -10   0   0    6.74    0.45 
 -10   0   0    6.53    0.35 
  10   0   0    5.93    0.40 
 -11   0   0    4.45    0.39 
 -11   0   0    4.38    0.39 
 -11   0   0    4.84    0.30 
  11   0   0    4.50    0.36 
  11  -1   0    4.47    0.36 
 -11   1   0    5.80    0.51 
 -11   1   0    5.14    0.31 
 -11   1   0    4.96    0.40 
  10  -1   0    5.19    0.37 
 -10   1   0    5.83    0.40 
 -10   1   0    5.31    0.31 
 -10   1   0    5.66    0.42 
   9  -1   0    1.76    0.20 
  -9   1   0    1.88    0.26 
  -9   1   0    1.77    0.24 
  -9   1   0    1.73    0.17 
   8  -1   0    1.69    0.17 
  -8   1   0    1.51    0.23 
  -8   1   0    1.10    0.20 
  -8   1   0    1.31    0.14 
   7  -1   0    1.50    0.16 
   7  -1   0    1.69    0.16 
  -7   1   0    1.59    0.21 
  -7   1   0    2.08    0.15 
  -7   1   0    1.92    0.17 
  -7   1   0    2.35    0.22 
   6  -1   0    9.60    0.43 
   6  -1   0    9.00    0.43 
  -6   1   0    9.29    0.40 
  -6   1   0    9.38    0.47 
  -6   1   0   10.60    0.47 
  -6   1   0    9.39    0.43 
   5  -1   0   37.90    1.40 
   5  -1   0   37.68    1.39 
  -5   1   0   37.13    1.39 
  -5   1   0   37.35    1.36 
  -5   1   0   37.83    1.41 
  -5   1   0   36.64    1.42 
   4  -1   0   15.40    0.63 
   4  -1   0   16.08    0.63 
  -4   1   0   16.41    0.63 
  -4   1   0   15.99    0.61 
  -4   1   0   16.77    0.66 
  -4   1   0   16.71    0.65 
   3  -1   0  102.84    3.67 
   3  -1   0   98.00    3.67 
  -3   1   0  103.38    3.67 
  -3   1   0  105.99    3.69 
  -3   1   0  107.05    3.65 
  -3   1   0  104.05    3.68 
   2  -1   0  814.49   26.56 
  -2   1   0  765.48   26.63 
  -2   1   0  750.49   26.52 
  -2   1   0  691.64   26.51 
  -2   1   0  744.36   26.43 
   1  -1   0  382.73   12.44 
   1  -1   0  335.29   12.43 
  -1   1   0  339.51   12.41 
  -1   1   0  378.34   12.36 
  -1   1   0  339.99   12.35 
  -1   1   0  339.16   12.47 
   0  -1   0   84.30    2.98 
  -1  -1   0    7.68    0.30 
   1   1   0    7.56    0.30 
   1   1   0    7.44    0.28 
   1   1   0    8.10    0.29 
  -2  -1   0    7.64    0.31 
  -2  -1   0    7.66    0.32 
  -2  -1   0    7.91    0.29 
   2   1   0    7.90    0.28 
   2   1   0    7.63    0.30 
   2   1   0    7.39    0.31 
  -3  -1   0    9.13    0.39 
  -3  -1   0    9.28    0.35 
  -3  -1   0    9.08    0.39 
   3   1   0    9.47    0.37 
  -4  -1   0   13.26    0.57 
  -4  -1   0   15.12    0.55 
  -4  -1   0   13.40    0.58 
  -4  -1   0   14.09    0.53 
   4   1   0   13.46    0.56 
   4   1   0   13.86    0.55 
  -5  -1   0   76.30    2.73 
  -5  -1   0   73.61    2.75 
  -5  -1   0   75.54    2.77 
  -5  -1   0   76.06    2.70 
   5   1   0   75.98    2.73 
   5   1   0   76.66    2.74 
  -6  -1   0   17.47    0.68 
  -6  -1   0   16.39    0.75 
  -6  -1   0   17.83    0.71 
  -6  -1   0   17.48    0.75 
   6   1   0   18.12    0.72 
   6   1   0   17.55    0.71 
  -7  -1   0    1.35    0.19 
  -7  -1   0    1.29    0.13 
  -7  -1   0    0.96    0.18 
   7   1   0    1.34    0.15 
   7   1   0    1.25    0.16 
  -8  -1   0   14.99    0.70 
  -8  -1   0   13.38    0.70 
  -8  -1   0   14.46    0.60 
   8   1   0   14.77    0.66 
   8   1   0   14.04    0.63 
  -9  -1   0    5.46    0.30 
  -9  -1   0    4.95    0.39 
  -9  -1   0    5.44    0.41 
   9   1   0    5.78    0.35 
 -10  -1   0    1.80    0.29 
 -10  -1   0    1.97    0.20 
 -10  -1   0    2.83    0.33 
  10   1   0    2.26    0.23 
 -11  -1   0    2.04    0.32 
 -11  -1   0    1.78    0.30 
 -11  -1   0    1.91    0.22 
  11   1   0    2.02    0.25 
  11  -2   0    1.34    0.22 
 -11   2   0    1.30    0.23 
 -11   2   0    1.20    0.16 
  10  -2   0    3.61    0.29 
 -10   2   0    3.46    0.32 
 -10   2   0    3.49    0.31 
 -10   2   0    3.55    0.23 
   9  -2   0    3.66    0.28 
  -9   2   0    3.85    0.22 
  -9   2   0    3.32    0.29 
  -9   2   0    3.94    0.31 
   8  -2   0    2.15    0.20 
  -8   2   0    2.31    0.24 
  -8   2   0    1.97    0.19 
  -8   2   0    1.86    0.22 
  -8   2   0    2.03    0.16 
   7  -2   0    0.89    0.14 
  -7   2   0    0.99    0.18 
  -7   2   0    1.10    0.14 
  -7   2   0    1.15    0.11 
  -7   2   0    0.94    0.16 
   6  -2   0   77.23    2.80 
   6  -2   0   79.97    2.81 
  -6   2   0   75.77    2.75 
  -6   2   0   74.28    2.81 
  -6   2   0   76.02    2.83 
  -6   2   0   79.74    2.80 
   5  -2   0    3.47    0.20 
   5  -2   0    3.65    0.21 
  -5   2   0    3.39    0.17 
  -5   2   0    3.65    0.23 
  -5   2   0    3.62    0.21 
  -5   2   0    3.56    0.22 
   4  -2   0  124.90    4.49 
   4  -2   0  131.31    4.50 
  -4   2   0  124.44    4.51 
  -4   2   0  126.61    4.46 
  -4   2   0  125.68    4.49 
  -4   2   0  126.66    4.50 
   3  -2   0    1.62    0.11 
  -3   2   0    1.42    0.11 
  -3   2   0    1.46    0.10 
  -3   2   0    1.69    0.08 
  -3   2   0    1.59    0.12 
   2  -2   0   19.23    0.75 
  -2   2   0   20.27    0.73 
  -2   2   0   23.23    0.76 
  -2   2   0   20.57    0.76 
  -2   2   0   19.05    0.76 
  -2   2   0   20.85    0.73 
   1  -2   0    0.25    0.03 
  -1   2   0    0.13    0.03 
  -1   2   0    0.13    0.02 
  -1   2   0    0.11    0.03 
   0  -2   0   16.66    0.63 
   0   2   0   17.25    0.61 
   0   2   0   17.13    0.64 
   0   2   0   18.59    0.62 
  -1  -2   0  530.83   19.36 
   1   2   0  565.06   19.23 
  -2  -2   0   36.64    1.28 
  -2  -2   0   35.12    1.28 
  -2  -2   0   33.92    1.23 
   2   2   0   35.82    1.26 
   2   2   0   33.08    1.25 
  -3  -2   0  126.74    4.43 
  -3  -2   0  123.36    4.37 
   3   2   0  121.80    4.39 
   3   2   0  125.61    4.40 
  -4  -2   0   11.83    0.46 
  -4  -2   0   11.88    0.52 
  -4  -2   0   11.64    0.51 
   4   2   0   11.94    0.49 
   4   2   0   12.04    0.44 
   4   2   0   12.30    0.48 
  -5  -2   0   85.04    3.13 
  -5  -2   0   83.50    3.14 
  -5  -2   0   92.12    3.07 
   5   2   0   87.49    3.04 
   5   2   0   85.54    3.11 
   5   2   0   83.23    3.09 
  -6  -2   0    5.08    0.33 
  -6  -2   0    5.44    0.32 
  -6  -2   0    5.55    0.25 
   6   2   0    4.80    0.28 
   6   2   0    5.13    0.27 
  -7  -2   0   -0.01    0.11 
  -7  -2   0    0.03    0.09 
  -7  -2   0    0.07    0.06 
   7   2   0    0.03    0.06 
   7   2   0   -0.02    0.05 
  -8  -2   0    2.05    0.18 
  -8  -2   0    2.29    0.28 
  -8  -2   0    2.30    0.24 
   8   2   0    2.37    0.20 
   8   2   0    2.33    0.20 
  -9  -2   0   11.40    0.63 
  -9  -2   0   11.07    0.61 
  -9  -2   0   11.29    0.50 
   9   2   0   10.69    0.55 
   9   2   0   10.83    0.54 
 -10  -2   0   12.23    0.66 
 -10  -2   0   12.30    0.68 
 -10  -2   0   11.55    0.54 
  10   2   0   10.89    0.58 
 -11  -2   0   -0.15    0.14 
 -11  -2   0    0.13    0.18 
 -11  -2   0    0.07    0.10 
  11   2   0    0.02    0.10 
  11  -3   0    6.74    0.44 
 -11   3   0    6.77    0.33 
 -11   3   0    6.81    0.45 
  10  -3   0    0.01    0.10 
 -10   3   0    0.08    0.11 
 -10   3   0    0.03    0.06 
 -10   3   0    0.18    0.13 
   9  -3   0   14.98    0.70 
  -9   3   0   15.61    0.71 
  -9   3   0   14.51    0.60 
  -9   3   0   14.88    0.73 
   8  -3   0   22.76    0.95 
  -8   3   0   22.65    0.98 
  -8   3   0   22.98    0.95 
  -8   3   0   23.02    0.96 
  -8   3   0   22.63    0.87 
   7  -3   0    1.98    0.18 
  -7   3   0    2.02    0.13 
  -7   3   0    2.08    0.21 
  -7   3   0    1.92    0.18 
  -7   3   0    1.92    0.19 
   6  -3   0    0.94    0.12 
  -6   3   0    0.98    0.14 
  -6   3   0    0.80    0.13 
  -6   3   0    0.74    0.13 
  -6   3   0    0.76    0.08 
   5  -3   0   19.02    0.73 
   5  -3   0   17.17    0.73 
  -5   3   0   19.19    0.68 
  -5   3   0   17.74    0.74 
  -5   3   0   19.96    0.74 
  -5   3   0   17.73    0.75 
   4  -3   0   11.98    0.49 
  -4   3   0   11.65    0.44 
  -4   3   0   12.22    0.49 
  -4   3   0   12.00    0.44 
  -4   3   0   11.63    0.49 
   3  -3   0    1.69    0.11 
  -3   3   0    1.60    0.07 
  -3   3   0    1.54    0.12 
  -3   3   0    1.60    0.07 
  -3   3   0    1.44    0.10 
  -3   3   0    1.55    0.11 
   2  -3   0   66.02    2.37 
  -2   3   0   66.23    2.38 
  -2   3   0   67.68    2.38 
  -2   3   0   66.76    2.36 
   1  -3   0    8.60    0.33 
  -1   3   0    8.98    0.35 
  -1   3   0    8.95    0.35 
  -1   3   0    9.06    0.33 
   0   3   0    0.70    0.04 
   0   3   0    0.71    0.06 
   0   3   0    0.79    0.04 
  -1  -3   0   61.28    2.20 
   1   3   0   58.56    2.18 
   1   3   0   59.34    2.17 
   1   3   0   67.43    2.17 
  -2  -3   0   36.17    1.34 
  -2  -3   0   37.02    1.34 
   2   3   0   37.33    1.30 
   2   3   0   35.07    1.31 
  -3  -3   0  321.72   11.41 
  -3  -3   0  337.51   11.49 
  -3  -3   0  325.53   11.39 
   3   3   0  322.62   11.38 
   3   3   0  314.01   11.43 
  -4  -3   0   30.65    1.17 
  -4  -3   0   30.69    1.17 
  -4  -3   0   31.21    1.10 
   4   3   0   29.41    1.14 
   4   3   0   30.04    1.12 
  -5  -3   0   13.20    0.57 
  -5  -3   0   12.82    0.58 
  -5  -3   0   13.21    0.50 
   5   3   0   12.35    0.54 
   5   3   0   12.38    0.52 
  -6  -3   0    1.62    0.19 
  -6  -3   0    1.91    0.19 
  -6  -3   0    1.69    0.13 
   6   3   0    1.64    0.14 
   6   3   0    1.82    0.16 
  -7  -3   0   24.82    0.91 
  -7  -3   0   23.33    1.01 
  -7  -3   0   23.58    0.99 
   7   3   0   22.93    0.95 
   7   3   0   22.32    0.93 
  -8  -3   0   10.07    0.46 
  -8  -3   0   10.48    0.57 
  -8  -3   0    9.77    0.55 
   8   3   0   10.19    0.51 
   8   3   0   10.94    0.50 
  -9  -3   0    8.96    0.56 
  -9  -3   0    9.63    0.45 
  -9  -3   0    8.90    0.54 
   9   3   0    9.74    0.50 
   9   3   0    9.51    0.48 
 -10  -3   0    0.10    0.09 
 -10  -3   0   -0.04    0.14 
 -10  -3   0   -0.08    0.14 
  10   3   0    0.08    0.09 
  10   3   0    0.17    0.11 
 -11  -3   0    1.59    0.21 
 -11  -3   0    1.32    0.28 
 -11  -3   0    1.63    0.29 
  11   3   0    1.56    0.22 
  11  -4   0   -0.01    0.10 
 -11   4   0   -0.09    0.05 
  10  -4   0    5.68    0.38 
 -10   4   0    5.68    0.40 
 -10   4   0    5.98    0.39 
 -10   4   0    5.82    0.27 
   9  -4   0    4.47    0.31 
  -9   4   0    4.22    0.34 
  -9   4   0    3.97    0.33 
  -9   4   0    4.70    0.32 
  -9   4   0    3.97    0.21 
   8  -4   0    0.28    0.10 
  -8   4   0    0.12    0.09 
  -8   4   0    0.44    0.12 
  -8   4   0    0.46    0.12 
  -8   4   0    0.27    0.06 
   7  -4   0    8.16    0.42 
  -7   4   0    8.43    0.43 
  -7   4   0    8.26    0.34 
  -7   4   0    8.85    0.43 
  -7   4   0    9.11    0.46 
   6  -4   0   53.28    2.00 
  -6   4   0   55.36    2.00 
  -6   4   0   53.93    2.00 
  -6   4   0   52.95    1.92 
  -6   4   0   54.27    2.03 
   5  -4   0   14.38    0.60 
  -5   4   0   14.78    0.54 
  -5   4   0   15.07    0.61 
  -5   4   0   14.93    0.54 
  -5   4   0   14.43    0.62 
  -5   4   0   14.65    0.61 
   4  -4   0    0.99    0.10 
  -4   4   0    1.00    0.11 
  -4   4   0    1.19    0.10 
  -4   4   0    1.16    0.12 
   3  -4   0  133.09    4.71 
  -3   4   0  129.98    4.73 
  -3   4   0  133.86    4.71 
  -3   4   0  135.46    4.72 
   2  -4   0    7.64    0.31 
  -2   4   0    7.74    0.33 
  -2   4   0    7.60    0.32 
  -2   4   0    7.65    0.31 
   1  -4   0   27.93    1.01 
  -1   4   0   28.58    1.04 
  -1   4   0   29.30    1.01 
  -1   4   0   25.84    1.01 
  -1   4   0   28.98    1.04 
   0  -4   0   14.16    0.54 
   0   4   0   15.13    0.53 
  -1  -4   0   24.69    0.87 
   1   4   0   22.61    0.82 
   1   4   0   21.57    0.82 
   1   4   0   23.43    0.83 
  -2  -4   0  146.04    5.00 
  -2  -4   0  143.70    5.00 
   2   4   0  133.29    4.95 
   2   4   0  138.24    4.96 
   2   4   0  142.96    4.95 
  -3  -4   0   90.51    3.24 
  -3  -4   0   91.70    3.24 
   3   4   0   86.06    3.20 
   3   4   0   91.74    3.19 
  -4  -4   0   31.09    1.16 
  -4  -4   0   28.57    1.15 
  -4  -4   0   29.42    1.07 
   4   4   0   30.59    1.10 
   4   4   0   29.17    1.12 
  -5  -4   0    4.11    0.19 
  -5  -4   0    3.97    0.27 
  -5  -4   0    3.98    0.26 
   5   4   0    4.42    0.24 
   5   4   0    3.91    0.22 
  -6  -4   0   26.31    1.06 
  -6  -4   0   24.63    0.95 
  -6  -4   0   24.77    1.05 
   6   4   0   26.29    0.99 
   6   4   0   25.11    1.00 
  -7  -4   0    7.89    0.47 
  -7  -4   0    8.90    0.38 
  -7  -4   0    8.38    0.46 
   7   4   0    7.87    0.41 
   7   4   0    8.40    0.40 
  -8  -4   0    3.93    0.24 
  -8  -4   0    3.91    0.32 
  -8  -4   0    3.84    0.35 
   8   4   0    4.07    0.27 
   8   4   0    3.80    0.27 
  -9  -4   0    3.55    0.24 
  -9  -4   0    3.55    0.34 
  -9  -4   0    3.20    0.35 
   9   4   0    4.04    0.29 
   9   4   0    3.62    0.27 
 -10  -4   0   -0.06    0.15 
 -10  -4   0    0.11    0.16 
 -10  -4   0    0.05    0.09 
  10   4   0    0.13    0.11 
  10   4   0    0.19    0.10 
 -11  -4   0    0.09    0.18 
 -11  -4   0    0.25    0.11 
  11   4   0    0.11    0.12 
  10  -5   0    0.57    0.15 
   9  -5   0    5.68    0.36 
  -9   5   0    5.33    0.36 
  -9   5   0    5.44    0.35 
  -9   5   0    5.64    0.38 
   8  -5   0   37.95    1.50 
  -8   5   0   35.95    1.49 
  -8   5   0   40.17    1.50 
  -8   5   0   38.88    1.53 
   7  -5   0   37.44    1.47 
  -7   5   0   39.12    1.50 
  -7   5   0   38.18    1.48 
  -7   5   0   37.34    1.46 
   6  -5   0    0.19    0.08 
  -6   5   0    0.19    0.08 
  -6   5   0    0.30    0.10 
  -6   5   0    0.41    0.09 
   5  -5   0   13.74    0.56 
  -5   5   0   12.94    0.56 
  -5   5   0   13.00    0.56 
  -5   5   0   13.35    0.58 
   4  -5   0    6.25    0.29 
  -4   5   0    6.13    0.30 
  -4   5   0    5.96    0.29 
  -4   5   0    5.78    0.29 
   3  -5   0   19.77    0.77 
  -3   5   0   20.64    0.80 
  -3   5   0   19.85    0.79 
  -3   5   0   21.43    0.78 
   2  -5   0    1.42    0.09 
  -2   5   0    1.30    0.09 
  -2   5   0    1.47    0.09 
  -2   5   0    1.17    0.10 
  -2   5   0    1.37    0.11 
   1  -5   0    9.17    0.38 
  -1   5   0   10.32    0.37 
  -1   5   0    9.83    0.41 
  -1   5   0    9.79    0.41 
  -1   5   0   10.27    0.38 
   0  -5   0    3.63    0.15 
   0   5   0    3.43    0.15 
   0   5   0    3.68    0.14 
  -1  -5   0   59.67    2.10 
   1   5   0   58.36    2.03 
   1   5   0   54.95    2.03 
  -2  -5   0  106.24    3.66 
   2   5   0  103.51    3.59 
   2   5   0   96.12    3.59 
  -3  -5   0   27.11    1.06 
  -3  -5   0   27.54    1.06 
   3   5   0   27.27    1.00 
   3   5   0   27.79    1.00 
   3   5   0   26.75    1.01 
  -4  -5   0    7.64    0.29 
  -4  -5   0    7.19    0.38 
  -4  -5   0    7.16    0.38 
   4   5   0    7.61    0.33 
   4   5   0    7.89    0.34 
   4   5   0    7.43    0.32 
  -5  -5   0    9.01    0.44 
  -5  -5   0    8.80    0.45 
  -5  -5   0    8.40    0.36 
   5   5   0    9.02    0.38 
   5   5   0    8.43    0.39 
  -6  -5   0    1.33    0.18 
  -6  -5   0    0.95    0.15 
   6   5   0    1.03    0.12 
   6   5   0    1.13    0.14 
  -7  -5   0    4.24    0.32 
  -7  -5   0    4.28    0.34 
   7   5   0    4.07    0.26 
   7   5   0    4.24    0.27 
  -8  -5   0   31.58    1.36 
  -8  -5   0   31.18    1.35 
   8   5   0   33.56    1.28 
   8   5   0   32.70    1.29 
  -9  -5   0    0.98    0.20 
  -9  -5   0    0.99    0.22 
   9   5   0    1.54    0.19 
   9   5   0    1.60    0.19 
 -10  -5   0    0.84    0.20 
 -10  -5   0    0.79    0.22 
  10   5   0    1.02    0.18 
  10   5   0    0.94    0.17 
 -11  -5   0    6.90    0.54 
  11   5   0    6.84    0.44 
  11   5   0    7.10    0.43 
   9  -6   0    9.53    0.51 
  -9   6   0    9.50    0.53 
  -9   6   0   10.34    0.55 
  -9   6   0    9.62    0.51 
   8  -6   0    1.44    0.18 
  -8   6   0    1.50    0.20 
  -8   6   0    1.48    0.18 
  -8   6   0    1.89    0.22 
   7  -6   0    7.38    0.39 
  -7   6   0    7.42    0.40 
  -7   6   0    7.27    0.41 
  -7   6   0    7.56    0.39 
   6  -6   0   15.85    0.65 
  -6   6   0   13.44    0.64 
  -6   6   0   15.40    0.66 
  -6   6   0   16.43    0.68 
   5  -6   0    0.06    0.05 
  -5   6   0    0.09    0.06 
  -5   6   0    0.20    0.07 
  -5   6   0    0.11    0.07 
   4  -6   0    2.73    0.17 
  -4   6   0    2.86    0.18 
  -4   6   0    2.64    0.19 
  -4   6   0    2.83    0.17 
   3  -6   0    0.22    0.05 
  -3   6   0    0.41    0.08 
  -3   6   0    0.25    0.06 
  -3   6   0    0.32    0.06 
   2  -6   0    9.50    0.39 
  -2   6   0   10.05    0.43 
  -2   6   0   10.16    0.40 
  -2   6   0    9.56    0.42 
  -2   6   0    9.89    0.39 
   1  -6   0   10.69    0.44 
  -1   6   0   11.16    0.49 
  -1   6   0   11.99    0.44 
  -1   6   0   12.75    0.45 
   0  -6   0   24.06    0.85 
   0   6   0   22.57    0.84 
   0   6   0   22.90    0.83 
  -1  -6   0   58.83    2.14 
   1   6   0   60.17    2.07 
   1   6   0   56.54    2.07 
  -2  -6   0    0.20    0.06 
   2   6   0    0.17    0.03 
   2   6   0    0.21    0.04 
   2   6   0    0.30    0.04 
  -3  -6   0    1.54    0.15 
  -3  -6   0    1.58    0.15 
   3   6   0    1.96    0.12 
   3   6   0    2.18    0.11 
   3   6   0    1.69    0.10 
   3   6   0    1.83    0.10 
  -4  -6   0    1.59    0.16 
  -4  -6   0    1.26    0.16 
   4   6   0    1.51    0.11 
   4   6   0    1.55    0.12 
  -5  -6   0    1.34    0.18 
  -5  -6   0    1.49    0.18 
   5   6   0    1.72    0.13 
   5   6   0    1.42    0.13 
  -6  -6   0   13.01    0.65 
  -6  -6   0   14.24    0.67 
   6   6   0   13.44    0.58 
   6   6   0   14.41    0.60 
  -7  -6   0   14.41    0.72 
  -7  -6   0   13.61    0.70 
   7   6   0   15.32    0.63 
   7   6   0   14.02    0.63 
  -8  -6   0    1.86    0.26 
  -8  -6   0    2.29    0.29 
   8   6   0    2.36    0.21 
   8   6   0    2.14    0.20 
  -9  -6   0    1.91    0.29 
  -9  -6   0    2.04    0.29 
   9   6   0    2.17    0.22 
   9   6   0    2.22    0.22 
 -10  -6   0    2.29    0.33 
 -10  -6   0    2.19    0.36 
  10   6   0    2.42    0.26 
  10   6   0    2.36    0.24 
 -11  -6   0    1.04    0.27 
  11   6   0    0.97    0.18 
  11   6   0    0.87    0.18 
  -9   7   0    1.64    0.23 
  -9   7   0    1.89    0.23 
  -8   7   0    0.05    0.09 
  -8   7   0    0.04    0.10 
  -8   7   0    0.03    0.08 
   7  -7   0    2.81    0.22 
  -7   7   0    2.47    0.22 
  -7   7   0    2.60    0.23 
  -7   7   0    3.15    0.24 
   6  -7   0    0.21    0.08 
  -6   7   0    0.12    0.08 
  -6   7   0    0.02    0.07 
  -6   7   0    0.02    0.06 
   5  -7   0    5.91    0.30 
  -5   7   0    5.83    0.33 
  -5   7   0    5.36    0.31 
  -5   7   0    6.35    0.32 
   4  -7   0    6.08    0.30 
  -4   7   0    6.21    0.33 
  -4   7   0    6.14    0.31 
  -4   7   0    5.84    0.30 
   3  -7   0    0.74    0.09 
  -3   7   0    0.70    0.09 
  -3   7   0    0.69    0.10 
  -3   7   0    0.82    0.11 
   2  -7   0    5.95    0.25 
  -2   7   0    5.00    0.26 
  -2   7   0    6.01    0.29 
  -2   7   0    5.70    0.29 
  -2   7   0    5.96    0.25 
   1  -7   0   25.04    0.96 
  -1   7   0   24.86    1.01 
  -1   7   0   26.81    0.96 
  -1   7   0   27.72    0.95 
   0  -7   0   12.85    0.52 
   0   7   0   13.39    0.51 
   0   7   0   14.92    0.52 
  -1  -7   0    1.44    0.14 
   1   7   0    1.54    0.08 
   1   7   0    1.51    0.08 
  -2  -7   0    4.26    0.26 
   2   7   0    4.72    0.21 
   2   7   0    4.52    0.19 
   2   7   0    4.28    0.19 
  -3  -7   0    4.33    0.27 
   3   7   0    4.19    0.19 
   3   7   0    4.09    0.19 
  -4  -7   0   27.21    1.11 
  -4  -7   0   25.66    1.10 
   4   7   0   28.15    1.04 
   4   7   0   27.66    1.02 
  -5  -7   0   11.54    0.58 
  -5  -7   0   11.33    0.57 
   5   7   0   10.94    0.50 
   5   7   0   12.72    0.50 
  -6  -7   0    6.05    0.41 
   6   7   0    6.63    0.35 
   6   7   0    7.52    0.34 
  -7  -7   0    0.89    0.18 
  -7  -7   0    0.86    0.18 
   7   7   0    0.67    0.12 
   7   7   0    1.09    0.14 
  -8  -7   0    1.59    0.24 
  -8  -7   0    0.94    0.20 
   8   7   0    0.98    0.15 
   8   7   0    1.01    0.17 
  -9  -7   0   -0.12    0.14 
  -9  -7   0    0.06    0.12 
   9   7   0    0.04    0.09 
   9   7   0    0.01    0.08 
 -10  -7   0    0.05    0.16 
 -10  -7   0   -0.03    0.17 
  10   7   0   -0.06    0.09 
  10   7   0    0.07    0.09 
  -9   8   0    1.83    0.25 
  -8   8   0    0.47    0.13 
  -8   8   0    0.45    0.13 
  -7   8   0   11.78    0.60 
  -7   8   0   12.32    0.58 
  -7   8   0   12.79    0.59 
  -6   8   0   11.70    0.55 
  -6   8   0   12.34    0.58 
  -6   8   0   11.51    0.55 
  -5   8   0    7.19    0.39 
  -5   8   0    7.15    0.38 
  -5   8   0    7.61    0.37 
  -4   8   0    0.35    0.08 
  -4   8   0    0.59    0.11 
  -4   8   0    0.48    0.10 
   3  -8   0    2.38    0.16 
  -3   8   0    2.69    0.20 
  -3   8   0    2.66    0.19 
  -3   8   0    2.85    0.17 
   2  -8   0    8.85    0.38 
  -2   8   0    8.86    0.43 
  -2   8   0    9.96    0.39 
  -2   8   0    9.27    0.44 
   1  -8   0    7.43    0.32 
  -1   8   0    8.07    0.32 
   0  -8   0   86.15    3.36 
   0  -8   0   97.99    3.29 
   0   8   0   91.69    3.28 
   0   8   0   94.71    3.27 
  -1  -8   0    3.06    0.22 
   1   8   0    2.99    0.14 
   1   8   0    3.12    0.14 
  -2  -8   0    3.73    0.25 
   2   8   0    3.59    0.16 
   2   8   0    3.51    0.16 
  -3  -8   0   16.04    0.70 
  -3  -8   0   15.87    0.70 
   3   8   0   14.95    0.59 
   3   8   0   15.14    0.61 
  -4  -8   0   20.09    0.90 
  -4  -8   0   20.84    0.91 
   4   8   0   21.16    0.82 
   4   8   0   21.43    0.80 
  -5  -8   0    0.40    0.13 
  -5  -8   0    0.21    0.10 
   5   8   0    0.42    0.07 
   5   8   0    0.28    0.08 
  -6  -8   0    3.80    0.32 
  -6  -8   0    4.38    0.35 
   6   8   0    4.51    0.25 
   6   8   0    4.58    0.26 
  -7  -8   0    0.14    0.12 
  -7  -8   0    0.14    0.13 
   7   8   0    0.19    0.08 
   7   8   0    0.13    0.08 
  -8  -8   0    6.45    0.47 
  -8  -8   0    6.06    0.45 
   8   8   0    5.74    0.34 
   8   8   0    5.72    0.35 
  -9  -8   0    1.22    0.26 
  -9  -8   0    0.98    0.23 
   9   8   0    1.20    0.18 
   9   8   0    1.11    0.18 
 -10  -8   0    2.31    0.33 
  10   8   0    2.41    0.26 
  10   8   0    2.54    0.26 
  -8   9   0    6.38    0.41 
  -7   9   0    2.19    0.24 
  -7   9   0    2.14    0.22 
  -7   9   0    2.32    0.23 
  -6   9   0    3.26    0.26 
  -6   9   0    3.56    0.26 
  -6   9   0    4.13    0.29 
  -5   9   0    2.49    0.20 
  -5   9   0    2.57    0.22 
  -5   9   0    2.77    0.22 
  -4   9   0    0.64    0.12 
  -4   9   0    0.76    0.13 
  -4   9   0    0.72    0.11 
  -3   9   0    1.46    0.13 
  -3   9   0    1.45    0.16 
  -3   9   0    1.45    0.16 
  -2   9   0   61.29    2.06 
  -2   9   0   49.09    1.98 
  -1   9   0   20.31    0.76 
   0  -9   0    0.49    0.07 
   0  -9   0    0.53    0.10 
   0   9   0    0.58    0.06 
  -1  -9   0    4.26    0.21 
  -1  -9   0    4.10    0.28 
   1   9   0    4.64    0.20 
   1   9   0    4.48    0.19 
  -2  -9   0    5.66    0.34 
   2   9   0    5.69    0.24 
  -3  -9   0    2.68    0.22 
  -3  -9   0    2.44    0.22 
   3   9   0    2.00    0.13 
  -4  -9   0    0.26    0.11 
  -4  -9   0    0.30    0.11 
   4   9   0    0.37    0.06 
  -5  -9   0   42.77    1.74 
  -5  -9   0   44.20    1.74 
   5   9   0   43.22    1.62 
   5   9   0   43.27    1.60 
  -6  -9   0    0.19    0.12 
  -6  -9   0    0.20    0.12 
   6   9   0    0.23    0.07 
   6   9   0    0.41    0.09 
  -7  -9   0    3.60    0.34 
  -7  -9   0    4.23    0.36 
   7   9   0    4.24    0.27 
   7   9   0    3.79    0.25 
  -8  -9   0    9.34    0.59 
  -8  -9   0    8.41    0.57 
   8   9   0   10.18    0.49 
   8   9   0    9.43    0.47 
  -9  -9   0    3.72    0.45 
  -9  -9   0    3.21    0.36 
   9   9   0    3.53    0.28 
   9   9   0    3.64    0.27 
  -7  10   0    0.30    0.12 
  -6  10   0   11.66    0.59 
  -6  10   0   12.71    0.62 
  -6  10   0   13.01    0.59 
  -5  10   0    1.37    0.16 
  -5  10   0    1.34    0.19 
  -5  10   0    1.31    0.17 
  -4  10   0   13.80    0.65 
  -4  10   0   14.31    0.61 
  -4  10   0   15.04    0.66 
  -3  10   0    1.90    0.15 
  -3  10   0    1.76    0.18 
  -2  10   0    1.21    0.11 
  -1  10   0    0.21    0.05 
   0 -10   0    0.10    0.08 
   0  10   0    0.06    0.03 
  -1 -10   0   14.54    0.67 
   1  10   0   14.33    0.55 
  -2 -10   0   22.03    0.96 
   2  10   0   22.24    0.82 
  -3 -10   0   19.76    0.87 
  -3 -10   0   19.05    0.87 
   3  10   0   19.09    0.73 
  -4 -10   0    2.41    0.25 
  -4 -10   0    2.42    0.25 
   4  10   0    2.49    0.17 
   4  10   0    2.20    0.15 
  -5 -10   0    1.87    0.23 
  -5 -10   0    2.04    0.25 
   5  10   0    1.84    0.15 
  -6 -10   0    5.48    0.41 
  -6 -10   0    4.62    0.39 
   6  10   0    5.18    0.30 
   6  10   0    5.18    0.28 
  -7 -10   0    3.13    0.34 
  -7 -10   0    3.36    0.35 
   7  10   0    3.12    0.23 
   7  10   0    2.91    0.23 
  -8 -10   0    1.84    0.30 
  -8 -10   0    1.82    0.30 
   8  10   0    2.28    0.21 
   8  10   0    1.87    0.21 
   9  10   0    2.38    0.24 
  -6  11   0    0.11    0.09 
  -5  11   0    1.38    0.20 
  -5  11   0    1.82    0.22 
  -5  11   0    1.45    0.18 
  -4  11   0    0.80    0.13 
  -4  11   0    1.03    0.16 
  -3  11   0    3.01    0.20 
  -2  11   0    0.10    0.05 
   1 -11   0    8.09    0.48 
  -1  11   0    9.39    0.38 
   0 -11   0   -0.05    0.08 
   0  11   0   -0.04    0.03 
  -1 -11   0   32.64    1.31 
   1  11   0   30.53    1.15 
  -2 -11   0   13.82    0.66 
   2  11   0   12.59    0.51 
  -3 -11   0    9.81    0.54 
  -3 -11   0    9.89    0.55 
   3  11   0   10.07    0.41 
  -4 -11   0    1.75    0.24 
  -4 -11   0    1.63    0.23 
   4  11   0    1.68    0.13 
  -5 -11   0    4.51    0.37 
  -5 -11   0    4.16    0.37 
   5  11   0    4.81    0.25 
  -6 -11   0   -0.03    0.11 
  -6 -11   0   -0.02    0.13 
   6  11   0    0.09    0.06 
  -7 -11   0    1.87    0.30 
  -7 -11   0    1.10    0.23 
   7  11   0    1.36    0.16 
  -8 -11   0    0.58    0.20 
   8  11   0    0.76    0.15 
   8  11   0    0.74    0.13 
  -5  12   0   -0.06    0.07 
  -4  12   0    5.77    0.33 
  -3  12   0   12.95    0.56 
  -2  12   0    0.07    0.05 
   1 -12   0   10.84    0.60 
  -1  12   0   12.99    0.50 
   0 -12   0    5.69    0.38 
   0  12   0    5.46    0.25 
  -1 -12   0   11.73    0.62 
   1  12   0   11.96    0.47 
  -2 -12   0    2.20    0.25 
   2  12   0    2.28    0.14 
  -3 -12   0    1.81    0.23 
  -3 -12   0    1.97    0.25 
   3  12   0    2.03    0.13 
  -4 -12   0    0.43    0.16 
  -4 -12   0    0.54    0.16 
   4  12   0    0.35    0.07 
  -5 -12   0    1.60    0.26 
  -5 -12   0    1.44    0.23 
   5  12   0    1.18    0.13 
  -6 -12   0    0.85    0.21 
  -6 -12   0    0.98    0.21 
   6  12   0    1.48    0.15 
  -7 -12   0    0.44    0.20 
   7  12   0    0.49    0.11 
  -4  13   0    2.51    0.22 
  -3  13   0    0.32    0.09 
   2 -13   0    0.72    0.16 
  -2  13   0    0.41    0.08 
   1 -13   0    1.73    0.22 
  -1  13   0    1.47    0.13 
   0 -13   0    3.19    0.31 
   0  13   0    3.80    0.20 
  -1 -13   0    3.32    0.30 
   1  13   0    2.05    0.14 
  -2 -13   0    5.96    0.42 
  -2 -13   0    6.26    0.44 
   2  13   0    6.46    0.28 
  -3 -13   0    0.14    0.12 
  -3 -13   0    0.38    0.15 
   3  13   0    0.24    0.06 
  -4 -13   0    0.24    0.14 
  -4 -13   0    0.17    0.13 
   4  13   0    0.30    0.07 
  -5 -13   0    7.21    0.53 
   5  13   0    7.82    0.36 
  -1  14   0    1.45    0.14 
   0  14   0    6.50    0.31 
   1  14   0    1.06    0.11 
  -2 -14   0    0.27    0.13 
   2  14   0    0.34    0.06 
  -3 -14   0    0.09    0.12 
   3  14   0   -0.01    0.05 
   4  13  -1    0.57    0.10 
  -4 -13   1    0.83    0.20 
   3  13  -1    0.83    0.11 
  -3 -13   1    0.91    0.21 
   2  13  -1    0.78    0.10 
  -2 -13   1    1.25    0.22 
  -2 -13   1    0.46    0.18 
   1  13  -1   -0.01    0.04 
  -1 -13   1   -0.11    0.09 
   0  13  -1    3.13    0.19 
   0 -13   1    2.70    0.30 
  -1  13  -1    0.66    0.11 
  -2  13  -1    3.05    0.21 
  -3  13  -1    5.69    0.32 
   6  12  -1    2.77    0.21 
  -6 -12   1    2.41    0.33 
   5  12  -1    3.75    0.23 
  -5 -12   1    3.22    0.40 
  -5 -12   1    3.99    0.36 
   4  12  -1   -0.08    0.04 
  -4 -12   1   -0.07    0.09 
  -4 -12   1   -0.04    0.09 
   3  12  -1    0.27    0.06 
  -3 -12   1    0.02    0.10 
  -3 -12   1    0.22    0.13 
   2  12  -1    7.43    0.33 
  -2 -12   1    7.23    0.47 
   1  12  -1    4.19    0.22 
  -1 -12   1    5.09    0.37 
   0  12  -1    0.47    0.08 
   0 -12   1    0.38    0.12 
  -1  12  -1    1.91    0.15 
   1 -12   1    1.82    0.23 
  -2  12  -1    0.81    0.12 
   2 -12   1    0.62    0.15 
  -3  12  -1    8.64    0.41 
  -4  12  -1   -0.02    0.07 
  -5  12  -1    1.11    0.19 
  -5  12  -1    1.13    0.19 
   7  11  -1    0.91    0.14 
  -7 -11   1    1.38    0.27 
   6  11  -1    0.27    0.08 
  -6 -11   1    0.08    0.14 
  -6 -11   1    0.14    0.15 
   5  11  -1    3.74    0.22 
  -5 -11   1    3.18    0.33 
  -5 -11   1    3.64    0.35 
   4  11  -1    2.64    0.17 
  -4 -11   1    2.59    0.27 
  -4 -11   1    2.69    0.29 
   3  11  -1    4.02    0.22 
  -3 -11   1    3.98    0.33 
  -3 -11   1    4.18    0.33 
   2  11  -1   13.92    0.54 
  -2 -11   1   12.71    0.67 
   1  11  -1    2.68    0.16 
  -1 -11   1    2.71    0.27 
   0  11  -1    3.64    0.19 
   0 -11   1    3.33    0.28 
  -1  11  -1    0.33    0.07 
   1 -11   1    0.16    0.09 
  -2  11  -1    2.03    0.16 
  -3  11  -1    4.79    0.27 
  -4  11  -1    3.32    0.28 
  -4  11  -1    3.07    0.23 
  -5  11  -1    1.25    0.20 
  -5  11  -1    1.36    0.18 
  -6  11  -1    4.54    0.34 
  -6  11  -1    4.62    0.32 
   8  10  -1    2.16    0.21 
   8  10  -1    1.79    0.21 
  -8 -10   1    2.25    0.33 
   7  10  -1    5.41    0.40 
   7  10  -1    4.82    0.30 
  -7 -10   1    5.04    0.43 
  -7 -10   1    5.89    0.45 
   6  10  -1    0.47    0.10 
  -6 -10   1    0.57    0.17 
  -6 -10   1    0.69    0.18 
   5  10  -1    5.18    0.27 
  -5 -10   1    5.12    0.38 
  -5 -10   1    4.57    0.38 
   4  10  -1    3.42    0.20 
  -4 -10   1    3.13    0.29 
  -4 -10   1    3.90    0.31 
   3  10  -1   15.13    0.58 
  -3 -10   1   14.20    0.71 
  -3 -10   1   14.06    0.71 
   2  10  -1    5.13    0.23 
  -2 -10   1    4.35    0.33 
   1  10  -1    9.05    0.38 
  -1 -10   1    9.49    0.51 
   0  10  -1    0.05    0.04 
   0 -10   1    0.07    0.08 
  -1  10  -1    0.06    0.04 
   1 -10   1   -0.02    0.08 
  -2  10  -1   16.68    0.67 
  -3  10  -1    0.65    0.13 
  -3  10  -1    0.46    0.09 
  -4  10  -1    0.03    0.06 
  -4  10  -1    0.08    0.09 
  -5  10  -1    6.20    0.34 
  -5  10  -1    6.06    0.37 
  -5  10  -1    5.76    0.37 
  -6  10  -1    5.60    0.37 
  -6  10  -1    5.81    0.35 
  -6  10  -1    5.09    0.35 
  -7  10  -1    0.48    0.13 
  -7  10  -1    0.57    0.14 
   9   9  -1    4.73    0.34 
   9   9  -1    4.78    0.33 
  -9  -9   1    5.15    0.47 
   8   9  -1    1.33    0.18 
   8   9  -1    1.21    0.17 
  -8  -9   1    0.96    0.24 
  -8  -9   1    1.48    0.28 
   7   9  -1    1.44    0.16 
   7   9  -1    1.43    0.17 
  -7  -9   1    0.92    0.21 
  -7  -9   1    1.01    0.21 
   6   9  -1    0.46    0.10 
   6   9  -1    0.61    0.11 
  -6  -9   1    0.57    0.17 
  -6  -9   1    0.34    0.15 
   5   9  -1   17.33    0.69 
  -5  -9   1   16.19    0.81 
  -5  -9   1   18.04    0.84 
   4   9  -1    5.55    0.28 
   4   9  -1    5.87    0.28 
  -4  -9   1    5.17    0.37 
  -4  -9   1    5.42    0.37 
   3   9  -1   37.31    1.35 
   3   9  -1   36.55    1.38 
  -3  -9   1   36.22    1.47 
  -3  -9   1   36.10    1.47 
   2   9  -1   43.39    1.58 
  -2  -9   1   43.83    1.71 
   1   9  -1    0.02    0.03 
  -1  -9   1    0.04    0.07 
   0   9  -1    4.13    0.20 
   0  -9   1    4.27    0.29 
  -1   9  -1   39.02    1.42 
  -2   9  -1    2.40    0.15 
  -2   9  -1    2.22    0.20 
  -3   9  -1   -0.02    0.05 
  -3   9  -1    0.04    0.07 
  -4   9  -1   -0.02    0.07 
  -4   9  -1   -0.10    0.06 
  -4   9  -1   -0.02    0.05 
  -5   9  -1    1.85    0.20 
  -5   9  -1    1.65    0.18 
  -5   9  -1    1.64    0.17 
  -6   9  -1   13.76    0.65 
  -6   9  -1   13.59    0.62 
  -6   9  -1   13.32    0.64 
  -7   9  -1    6.93    0.41 
  -7   9  -1    7.10    0.43 
  -7   9  -1    7.24    0.42 
  -8   9  -1    4.48    0.34 
   9   8  -1    0.12    0.10 
   9   8  -1    0.00    0.09 
  -9  -8   1   -0.13    0.18 
  -9  -8   1   -0.04    0.14 
   8   8  -1    3.05    0.25 
   8   8  -1    2.86    0.24 
  -8  -8   1    3.39    0.35 
  -8  -8   1    3.52    0.37 
   7   8  -1    3.44    0.24 
   7   8  -1    3.09    0.24 
  -7  -8   1    2.99    0.33 
  -7  -8   1    3.54    0.33 
   6   8  -1    2.87    0.21 
   6   8  -1    3.11    0.21 
  -6  -8   1    2.87    0.29 
  -6  -8   1    3.35    0.31 
   5   8  -1   17.21    0.66 
   5   8  -1   15.90    0.67 
  -5  -8   1   16.36    0.77 
  -5  -8   1   15.18    0.76 
   4   8  -1   67.97    2.42 
   4   8  -1   66.65    2.43 
  -4  -8   1   65.65    2.54 
  -4  -8   1   67.95    2.54 
   3   8  -1    7.05    0.32 
   3   8  -1    7.02    0.31 
  -3  -8   1    7.96    0.42 
  -3  -8   1    7.12    0.41 
   2   8  -1    1.71    0.11 
  -2  -8   1    1.78    0.18 
   1   8  -1    1.39    0.09 
  -1  -8   1    1.43    0.16 
   0   8  -1    1.18    0.09 
   0  -8   1    1.02    0.14 
   0  -8   1    1.27    0.10 
  -1   8  -1   20.63    0.77 
  -2   8  -1    3.21    0.18 
  -2   8  -1    3.21    0.23 
  -3   8  -1   13.14    0.56 
  -3   8  -1   14.23    0.61 
  -3   8  -1   14.16    0.61 
  -4   8  -1    9.32    0.46 
  -4   8  -1    9.30    0.42 
  -4   8  -1    9.44    0.46 
  -5   8  -1   18.97    0.78 
  -5   8  -1   18.56    0.81 
  -5   8  -1   19.27    0.81 
  -6   8  -1    9.77    0.50 
  -6   8  -1   10.09    0.48 
  -6   8  -1    9.06    0.48 
  -7   8  -1    3.23    0.27 
  -7   8  -1    3.53    0.28 
  -7   8  -1    3.40    0.26 
  -8   8  -1    0.44    0.13 
  -8   8  -1    0.44    0.14 
  -8   8  -1    0.31    0.12 
  -9   8  -1    0.58    0.15 
  10   7  -1    0.62    0.14 
  10   7  -1    0.65    0.16 
 -10  -7   1    0.68    0.23 
   9   7  -1    1.75    0.22 
   9   7  -1    1.74    0.21 
  -9  -7   1    1.72    0.29 
  -9  -7   1    2.09    0.30 
   8   7  -1    4.16    0.30 
   8   7  -1    4.60    0.29 
  -8  -7   1    4.44    0.38 
  -8  -7   1    4.37    0.40 
   7   7  -1    0.82    0.14 
   7   7  -1    0.76    0.13 
  -7  -7   1    0.62    0.18 
  -7  -7   1    0.78    0.18 
   6   7  -1   13.56    0.60 
   6   7  -1   13.30    0.58 
  -6  -7   1   14.43    0.70 
  -6  -7   1   14.00    0.69 
   5   7  -1    9.91    0.44 
   5   7  -1    9.97    0.43 
  -5  -7   1    9.53    0.53 
  -5  -7   1    9.75    0.52 
   4   7  -1    0.51    0.08 
  -4  -7   1    0.43    0.11 
  -4  -7   1    0.58    0.13 
   3   7  -1    1.14    0.10 
   3   7  -1    0.98    0.09 
  -3  -7   1    0.91    0.14 
  -3  -7   1    1.01    0.14 
   2   7  -1    5.15    0.23 
   2   7  -1    5.12    0.22 
   2   7  -1    5.01    0.22 
  -2  -7   1    4.62    0.29 
   1   7  -1    4.48    0.19 
   1   7  -1    4.25    0.19 
  -1  -7   1    4.21    0.26 
   0   7  -1   42.31    1.51 
   0   7  -1   42.02    1.51 
   0  -7   1   42.72    1.59 
   0  -7   1   41.04    1.50 
  -1   7  -1   29.63    1.07 
  -1   7  -1   28.88    1.13 
  -1   7  -1   27.87    1.06 
   1  -7   1   30.16    1.06 
  -2   7  -1    9.48    0.43 
  -2   7  -1    9.61    0.38 
  -2   7  -1    9.03    0.43 
   2  -7   1    9.05    0.37 
  -3   7  -1    5.36    0.30 
  -3   7  -1    5.44    0.30 
  -3   7  -1    6.43    0.28 
   3  -7   1    5.54    0.26 
  -4   7  -1    4.58    0.25 
  -4   7  -1    4.48    0.27 
  -4   7  -1    4.38    0.27 
  -5   7  -1    5.31    0.31 
  -5   7  -1    5.14    0.30 
  -5   7  -1    4.87    0.28 
  -6   7  -1    1.36    0.16 
  -6   7  -1    1.40    0.17 
  -6   7  -1    1.39    0.17 
  -7   7  -1    2.38    0.22 
  -7   7  -1    2.36    0.22 
  -7   7  -1    2.26    0.23 
  -8   7  -1    0.36    0.13 
  -8   7  -1    0.37    0.12 
  -8   7  -1    0.44    0.12 
  -9   7  -1    0.53    0.15 
  -9   7  -1    0.71    0.15 
  10   6  -1    8.29    0.47 
  10   6  -1    7.75    0.45 
 -10  -6   1    6.83    0.53 
   9   6  -1    0.57    0.14 
   9   6  -1    0.41    0.11 
  -9  -6   1    0.77    0.20 
  -9  -6   1    0.80    0.21 
   8   6  -1    7.19    0.38 
   8   6  -1    7.53    0.41 
  -8  -6   1    6.04    0.46 
  -8  -6   1    6.61    0.46 
   7   6  -1    3.47    0.23 
   7   6  -1    2.85    0.23 
  -7  -6   1    3.46    0.29 
  -7  -6   1    2.94    0.31 
   6   6  -1    0.62    0.11 
   6   6  -1    0.47    0.10 
  -6  -6   1    0.40    0.12 
  -6  -6   1    0.40    0.14 
   5   6  -1    0.85    0.11 
   5   6  -1    1.10    0.11 
  -5  -6   1    0.90    0.16 
  -5  -6   1    0.94    0.15 
   4   6  -1    6.35    0.31 
   4   6  -1    6.09    0.29 
  -4  -6   1    6.57    0.37 
  -4  -6   1    7.18    0.38 
   3   6  -1    0.05    0.03 
   3   6  -1    0.05    0.04 
   3   6  -1    0.09    0.03 
  -3  -6   1    0.09    0.06 
  -3  -6   1   -0.02    0.04 
   2   6  -1   11.73    0.46 
   2   6  -1   11.49    0.45 
   2   6  -1   12.23    0.46 
  -2  -6   1   11.74    0.53 
   1   6  -1   74.53    2.73 
   1   6  -1   79.17    2.73 
  -1  -6   1   77.82    2.81 
   0   6  -1   10.21    0.40 
   0   6  -1   10.74    0.40 
   0  -6   1    9.97    0.39 
  -1   6  -1    7.42    0.31 
  -1   6  -1    7.29    0.35 
  -1   6  -1    7.71    0.30 
   1  -6   1    7.26    0.29 
  -2   6  -1   17.05    0.70 
  -2   6  -1   17.12    0.67 
  -2   6  -1   17.28    0.66 
  -2   6  -1   18.29    0.71 
   2  -6   1   17.75    0.65 
  -3   6  -1    2.97    0.19 
  -3   6  -1    2.74    0.16 
  -3   6  -1    2.74    0.18 
   3  -6   1    2.95    0.15 
  -4   6  -1    6.81    0.34 
  -4   6  -1    6.98    0.34 
  -4   6  -1    5.82    0.31 
   4  -6   1    6.82    0.30 
  -5   6  -1    1.89    0.17 
  -5   6  -1    2.20    0.19 
  -5   6  -1    2.10    0.17 
   5  -6   1    2.32    0.16 
  -6   6  -1    8.42    0.42 
  -6   6  -1    8.23    0.43 
  -6   6  -1    9.14    0.42 
   6  -6   1    8.03    0.40 
  -7   6  -1    0.28    0.09 
  -7   6  -1    0.25    0.09 
  -7   6  -1    0.21    0.10 
   7  -6   1    0.23    0.08 
  -8   6  -1    4.97    0.34 
  -8   6  -1    5.09    0.35 
  -8   6  -1    5.61    0.34 
  -9   6  -1   16.25    0.81 
  -9   6  -1   18.30    0.81 
  -9   6  -1   18.69    0.83 
 -10   6  -1    0.14    0.11 
  11   5  -1    3.17    0.29 
  10   5  -1    0.40    0.13 
  10   5  -1    0.48    0.14 
 -10  -5   1    0.64    0.23 
 -10  -5   1    0.66    0.21 
   9   5  -1    1.29    0.18 
   9   5  -1    0.81    0.16 
  -9  -5   1    1.01    0.23 
  -9  -5   1    0.97    0.21 
   8   5  -1    0.66    0.13 
   8   5  -1    0.61    0.12 
  -8  -5   1    1.04    0.20 
  -8  -5   1    0.75    0.19 
   7   5  -1    9.29    0.45 
   7   5  -1    9.72    0.47 
  -7  -5   1    9.41    0.52 
  -7  -5   1    9.62    0.55 
   6   5  -1   10.70    0.47 
   6   5  -1   10.64    0.49 
  -6  -5   1   10.36    0.54 
  -6  -5   1   10.03    0.54 
   5   5  -1    8.64    0.39 
   5   5  -1    8.02    0.37 
  -5  -5   1    7.67    0.44 
  -5  -5   1    9.12    0.45 
   4   5  -1    3.65    0.21 
   4   5  -1    3.77    0.20 
  -4  -5   1    3.85    0.17 
  -4  -5   1    3.34    0.24 
  -4  -5   1    3.85    0.25 
   3   5  -1   45.56    1.66 
   3   5  -1   45.12    1.66 
   3   5  -1   46.47    1.67 
  -3  -5   1   45.65    1.73 
  -3  -5   1   48.16    1.74 
   2   5  -1   18.22    0.68 
   2   5  -1   17.36    0.67 
   2   5  -1   18.44    0.68 
  -2  -5   1   18.58    0.74 
   1   5  -1   22.92    0.79 
   1   5  -1   21.37    0.79 
   1   5  -1   20.80    0.79 
  -1  -5   1   22.08    0.86 
   0   5  -1    4.41    0.20 
   0   5  -1    5.63    0.21 
   0  -5   1    4.46    0.19 
  -1   5  -1   -0.07    0.03 
  -1   5  -1   -0.02    0.02 
  -1   5  -1   -0.03    0.02 
  -2   5  -1   12.24    0.47 
  -2   5  -1   12.01    0.50 
  -2   5  -1   11.80    0.51 
  -2   5  -1   12.41    0.51 
   2  -5   1   12.62    0.47 
  -3   5  -1    2.45    0.16 
  -3   5  -1    2.76    0.17 
  -3   5  -1    2.66    0.15 
   3  -5   1    2.51    0.14 
  -4   5  -1   15.41    0.60 
  -4   5  -1   14.31    0.61 
  -4   5  -1   15.09    0.61 
   4  -5   1   14.11    0.58 
  -5   5  -1    0.44    0.09 
  -5   5  -1    0.41    0.08 
  -5   5  -1    0.44    0.09 
   5  -5   1    0.66    0.10 
  -6   5  -1    2.74    0.21 
  -6   5  -1    2.28    0.20 
  -6   5  -1    2.61    0.20 
   6  -5   1    3.01    0.20 
  -7   5  -1   18.76    0.77 
  -7   5  -1   17.57    0.78 
  -7   5  -1   17.10    0.76 
   7  -5   1   18.13    0.75 
  -8   5  -1    6.88    0.39 
  -8   5  -1    7.08    0.40 
  -8   5  -1    6.37    0.40 
   8  -5   1    6.65    0.37 
  -9   5  -1    0.77    0.16 
  -9   5  -1    0.79    0.16 
  -9   5  -1    0.72    0.15 
   9  -5   1    1.01    0.17 
 -10   5  -1    0.08    0.10 
  11   4  -1    0.44    0.15 
 -11  -4   1    0.50    0.22 
 -11  -4   1    0.20    0.11 
  10   4  -1    2.11    0.25 
  10   4  -1    2.36    0.24 
 -10  -4   1    2.52    0.36 
 -10  -4   1    2.10    0.21 
 -10  -4   1    2.32    0.32 
   9   4  -1    1.17    0.19 
   9   4  -1    1.52    0.18 
  -9  -4   1    1.55    0.17 
  -9  -4   1    1.12    0.25 
  -9  -4   1    1.41    0.25 
   8   4  -1   19.53    0.85 
   8   4  -1   19.19    0.86 
  -8  -4   1   19.97    0.94 
  -8  -4   1   21.30    0.82 
  -8  -4   1   21.14    0.93 
   7   4  -1    8.15    0.42 
   7   4  -1    8.75    0.41 
  -7  -4   1    7.76    0.46 
  -7  -4   1    8.09    0.48 
  -7  -4   1    8.19    0.37 
   6   4  -1    3.60    0.22 
   6   4  -1    3.64    0.23 
  -6  -4   1    3.60    0.20 
  -6  -4   1    3.10    0.27 
  -6  -4   1    3.62    0.27 
   5   4  -1    8.85    0.39 
   5   4  -1    7.97    0.39 
  -5  -4   1    8.63    0.35 
  -5  -4   1    8.87    0.45 
  -5  -4   1    8.73    0.43 
   4   4  -1   28.66    1.11 
   4   4  -1   31.17    1.13 
  -4  -4   1   29.82    1.16 
  -4  -4   1   29.44    1.08 
  -4  -4   1   30.00    1.17 
   3   4  -1    0.29    0.05 
   3   4  -1    0.22    0.05 
  -3  -4   1    0.29    0.08 
  -3  -4   1    0.18    0.06 
   2   4  -1  148.45    5.27 
   2   4  -1  145.83    5.28 
   2   4  -1  153.00    5.27 
  -2  -4   1  152.18    5.33 
   1   4  -1   27.00    0.96 
   1   4  -1   24.87    0.96 
   1   4  -1   27.16    0.97 
  -1  -4   1   28.37    1.02 
   0   4  -1   23.82    0.85 
   0   4  -1   23.48    0.89 
  -1   4  -1   22.12    0.84 
  -1   4  -1   23.71    0.84 
  -1   4  -1   23.32    0.87 
  -1   4  -1   22.53    0.87 
   1  -4   1   23.28    0.83 
  -2   4  -1    2.03    0.11 
  -2   4  -1    1.57    0.12 
  -2   4  -1    1.70    0.12 
   2  -4   1    1.82    0.10 
  -3   4  -1  171.79    6.43 
  -3   4  -1  181.66    6.45 
  -3   4  -1  189.54    6.45 
   3  -4   1  186.86    6.42 
  -4   4  -1    1.37    0.13 
  -4   4  -1    1.16    0.12 
  -4   4  -1    1.49    0.12 
   4  -4   1    1.41    0.11 
  -5   4  -1    4.44    0.27 
  -5   4  -1    4.57    0.26 
  -5   4  -1    4.77    0.18 
  -5   4  -1    4.85    0.18 
  -5   4  -1    4.17    0.25 
   5  -4   1    4.75    0.24 
  -6   4  -1    0.00    0.07 
  -6   4  -1    0.12    0.07 
  -6   4  -1    0.03    0.03 
  -6   4  -1    0.02    0.06 
   6  -4   1    0.03    0.06 
  -7   4  -1    2.46    0.13 
  -7   4  -1    2.38    0.21 
  -7   4  -1    2.23    0.20 
  -7   4  -1    2.52    0.22 
   7  -4   1    2.61    0.20 
  -8   4  -1    0.89    0.17 
  -8   4  -1    0.90    0.16 
  -8   4  -1    0.94    0.09 
  -8   4  -1    1.06    0.16 
   8  -4   1    0.99    0.15 
  -9   4  -1   14.22    0.69 
  -9   4  -1   14.11    0.55 
  -9   4  -1   14.23    0.67 
  -9   4  -1   14.51    0.68 
   9  -4   1   14.25    0.66 
 -10   4  -1    4.45    0.34 
 -10   4  -1    5.44    0.39 
 -10   4  -1    4.78    0.23 
  10  -4   1    4.91    0.34 
 -11   4  -1    3.98    0.20 
 -11   4  -1    3.93    0.35 
  11  -4   1    3.56    0.31 
  11   3  -1    0.03    0.10 
 -11  -3   1    0.16    0.10 
 -11  -3   1   -0.25    0.15 
  10   3  -1    3.06    0.27 
  10   3  -1    2.97    0.27 
 -10  -3   1    3.03    0.35 
 -10  -3   1    3.10    0.25 
 -10  -3   1    3.00    0.35 
   9   3  -1   12.04    0.59 
   9   3  -1   12.44    0.57 
  -9  -3   1   11.17    0.52 
  -9  -3   1   11.01    0.63 
  -9  -3   1   11.48    0.66 
   8   3  -1    4.96    0.31 
   8   3  -1    4.53    0.30 
  -8  -3   1    4.36    0.34 
  -8  -3   1    4.34    0.38 
  -8  -3   1    4.81    0.27 
   7   3  -1    0.16    0.07 
   7   3  -1    0.24    0.08 
  -7  -3   1    0.24    0.12 
  -7  -3   1    0.18    0.07 
  -7  -3   1    0.07    0.09 
   6   3  -1    0.48    0.09 
   6   3  -1    0.65    0.10 
  -6  -3   1    0.65    0.14 
  -6  -3   1    0.44    0.07 
  -6  -3   1    0.88    0.15 
   5   3  -1    0.89    0.10 
   5   3  -1    0.79    0.10 
  -5  -3   1    0.82    0.12 
  -5  -3   1    0.76    0.13 
  -5  -3   1    0.84    0.08 
   4   3  -1   49.23    1.74 
   4   3  -1   46.86    1.75 
  -4  -3   1   47.87    1.79 
  -4  -3   1   48.35    1.71 
  -4  -3   1   46.72    1.78 
   3   3  -1   85.35    2.99 
   3   3  -1   72.47    2.97 
  -3  -3   1   85.84    2.95 
  -3  -3   1   89.55    3.02 
  -3  -3   1   85.48    3.02 
   2   3  -1   87.67    3.14 
  -2  -3   1   89.66    3.18 
   1   3  -1    0.11    0.03 
   1   3  -1    0.12    0.03 
  -1  -3   1    0.07    0.04 
   0   3  -1    0.04    0.03 
   0   3  -1    0.05    0.02 
   0   3  -1    0.03    0.01 
  -1   3  -1   11.24    0.44 
  -1   3  -1   11.74    0.46 
  -1   3  -1   11.99    0.46 
   1  -3   1   12.31    0.43 
  -2   3  -1   32.90    1.23 
  -2   3  -1   33.87    1.21 
  -2   3  -1   33.20    1.23 
   2  -3   1   34.24    1.20 
  -3   3  -1   43.61    1.55 
  -3   3  -1   43.83    1.55 
  -3   3  -1   44.99    1.53 
  -3   3  -1   42.62    1.49 
  -3   3  -1   35.98    1.48 
   3  -3   1   42.94    1.52 
  -4   3  -1    6.96    0.34 
  -4   3  -1    7.80    0.33 
  -4   3  -1    7.44    0.29 
  -4   3  -1    7.73    0.35 
  -4   3  -1    7.35    0.29 
   4  -3   1    7.65    0.33 
  -5   3  -1    0.86    0.12 
  -5   3  -1    0.96    0.07 
  -5   3  -1    0.85    0.12 
  -5   3  -1    1.00    0.11 
   5  -3   1    0.84    0.10 
   5  -3   1    0.86    0.10 
  -6   3  -1   26.09    1.10 
  -6   3  -1   29.37    1.10 
  -6   3  -1   27.67    1.01 
  -6   3  -1   28.07    1.08 
   6  -3   1   27.58    1.07 
  -7   3  -1    6.15    0.34 
  -7   3  -1    6.81    0.37 
  -7   3  -1    6.06    0.28 
  -7   3  -1    6.57    0.37 
   7  -3   1    6.49    0.34 
  -8   3  -1   19.90    0.82 
  -8   3  -1   19.50    0.73 
  -8   3  -1   18.14    0.83 
  -8   3  -1   19.32    0.83 
   8  -3   1   18.60    0.81 
  -9   3  -1    1.29    0.21 
  -9   3  -1    1.34    0.21 
  -9   3  -1    1.19    0.12 
   9  -3   1    0.94    0.16 
 -10   3  -1    0.81    0.17 
 -10   3  -1    0.59    0.15 
 -10   3  -1    0.68    0.10 
  10  -3   1    0.50    0.14 
 -11   3  -1    1.03    0.20 
 -11   3  -1    0.92    0.13 
  11  -3   1    0.91    0.18 
  11   2  -1    0.13    0.12 
 -11  -2   1    0.28    0.12 
 -11  -2   1    0.26    0.18 
  10   2  -1    8.95    0.50 
 -10  -2   1    8.72    0.44 
 -10  -2   1    8.40    0.54 
 -10  -2   1    8.63    0.56 
   9   2  -1    2.76    0.24 
   9   2  -1    2.80    0.24 
  -9  -2   1    2.63    0.30 
  -9  -2   1    2.41    0.21 
  -9  -2   1    2.51    0.32 
   8   2  -1    0.06    0.08 
   8   2  -1    0.08    0.07 
  -8  -2   1    0.22    0.08 
  -8  -2   1   -0.07    0.10 
  -8  -2   1    0.02    0.13 
   7   2  -1   12.06    0.56 
   7   2  -1   12.71    0.55 
  -7  -2   1   12.17    0.62 
  -7  -2   1   12.24    0.59 
  -7  -2   1   11.57    0.51 
   6   2  -1   39.43    1.50 
   6   2  -1   38.66    1.48 
  -6  -2   1   40.53    1.45 
  -6  -2   1   39.82    1.55 
  -6  -2   1   38.46    1.52 
   5   2  -1   18.14    0.66 
   5   2  -1   18.34    0.72 
   5   2  -1   18.79    0.73 
  -5  -2   1   17.27    0.68 
  -5  -2   1   17.18    0.74 
  -5  -2   1   18.24    0.77 
   4   2  -1   22.26    0.84 
   4   2  -1   21.65    0.80 
   4   2  -1   21.65    0.85 
  -4  -2   1   22.24    0.82 
  -4  -2   1   22.32    0.87 
  -4  -2   1   22.63    0.89 
   3   2  -1  165.39    5.65 
   3   2  -1  157.09    5.63 
  -3  -2   1  158.33    5.66 
  -3  -2   1  150.42    5.61 
  -3  -2   1  167.97    5.68 
   2   2  -1   59.83    2.12 
   2   2  -1   62.50    2.13 
  -2  -2   1   59.77    2.15 
  -2  -2   1   60.93    2.15 
  -2  -2   1   55.36    2.10 
   1   2  -1   74.34    2.75 
   1   2  -1   79.11    2.75 
  -1  -2   1   80.40    2.78 
   0   2  -1    2.78    0.12 
   0   2  -1    2.85    0.11 
  -1   2  -1    8.78    0.33 
  -1   2  -1    8.76    0.35 
   1  -2   1    8.63    0.32 
  -2   2  -1   26.37    0.96 
  -2   2  -1   26.56    0.97 
  -2   2  -1   25.44    0.97 
  -2   2  -1   27.09    0.93 
   2  -2   1   26.02    0.95 
  -3   2  -1    3.76    0.15 
  -3   2  -1    3.84    0.18 
  -3   2  -1    3.59    0.19 
  -3   2  -1    3.62    0.19 
   3  -2   1    3.57    0.17 
  -4   2  -1    0.16    0.06 
  -4   2  -1    0.18    0.05 
  -4   2  -1    0.21    0.04 
  -4   2  -1    0.26    0.07 
   4  -2   1    0.23    0.05 
   4  -2   1    0.19    0.05 
  -5   2  -1  126.88    4.40 
  -5   2  -1  123.76    4.44 
  -5   2  -1  120.41    4.46 
  -5   2  -1  126.83    4.46 
   5  -2   1  123.81    4.44 
   5  -2   1  126.53    4.44 
  -6   2  -1   38.30    1.40 
  -6   2  -1   38.93    1.48 
  -6   2  -1   39.53    1.48 
  -6   2  -1   38.87    1.45 
   6  -2   1   38.51    1.45 
   6  -2   1   37.77    1.45 
  -7   2  -1    2.21    0.19 
  -7   2  -1    1.87    0.19 
  -7   2  -1    1.86    0.14 
  -7   2  -1    1.94    0.20 
   7  -2   1    1.91    0.17 
  -8   2  -1    0.15    0.06 
  -8   2  -1    0.06    0.07 
  -8   2  -1    0.04    0.10 
  -8   2  -1    0.14    0.11 
   8  -2   1    0.20    0.09 
  -9   2  -1   -0.04    0.09 
  -9   2  -1   -0.06    0.10 
  -9   2  -1    0.12    0.06 
   9  -2   1    0.15    0.09 
 -10   2  -1    0.88    0.14 
 -10   2  -1    1.01    0.19 
 -10   2  -1    1.02    0.20 
  10  -2   1    0.74    0.15 
 -11   2  -1    0.54    0.17 
 -11   2  -1    0.33    0.10 
  11  -2   1    0.67    0.16 
  11   1  -1    0.34    0.14 
 -11  -1   1    0.32    0.18 
 -11  -1   1    0.51    0.13 
  10   1  -1    4.48    0.33 
 -10  -1   1    4.26    0.40 
 -10  -1   1    4.68    0.39 
 -10  -1   1    4.02    0.28 
   9   1  -1   15.95    0.75 
  -9  -1   1   16.72    0.70 
  -9  -1   1   17.14    0.80 
  -9  -1   1   16.80    0.83 
   8   1  -1    7.67    0.42 
   8   1  -1    8.22    0.44 
  -8  -1   1    7.97    0.48 
  -8  -1   1    8.71    0.48 
  -8  -1   1    8.43    0.39 
   7   1  -1    3.02    0.24 
   7   1  -1    3.40    0.23 
  -7  -1   1    3.36    0.30 
  -7  -1   1    3.38    0.27 
  -7  -1   1    3.29    0.20 
   6   1  -1   61.93    2.32 
   6   1  -1   64.86    2.31 
  -6  -1   1   62.08    2.27 
  -6  -1   1   63.42    2.34 
  -6  -1   1   64.59    2.37 
  -6  -1   1   61.38    2.29 
   5   1  -1  126.70    4.59 
   5   1  -1  129.65    4.58 
  -5  -1   1  130.11    4.55 
  -5  -1   1  128.55    4.62 
  -5  -1   1  128.09    4.57 
  -5  -1   1  127.97    4.60 
   4   1  -1    4.59    0.22 
  -4  -1   1    3.97    0.19 
  -4  -1   1    3.83    0.20 
  -4  -1   1    4.08    0.24 
  -4  -1   1    4.08    0.23 
   3   1  -1   30.11    1.11 
   3   1  -1   29.85    1.10 
  -3  -1   1   31.40    1.13 
  -3  -1   1   28.58    1.11 
  -3  -1   1   30.08    1.08 
   2   1  -1    0.01    0.03 
   2   1  -1    0.03    0.03 
   2   1  -1    0.10    0.02 
  -2  -1   1   -0.01    0.04 
  -2  -1   1    0.03    0.02 
  -2  -1   1    0.14    0.04 
   1   1  -1   15.05    0.57 
  -1  -1   1   16.51    0.59 
   0   1  -1   20.52    0.73 
   0   1  -1   21.07    0.72 
   0   1  -1   19.70    0.74 
  -1   1  -1  209.71    7.29 
  -1   1  -1  181.60    7.32 
  -1   1  -1  208.76    7.39 
   1  -1   1  201.21    7.33 
   1  -1   1  234.65    7.30 
  -2   1  -1   37.32    1.34 
  -2   1  -1   36.56    1.35 
  -2   1  -1   38.11    1.33 
  -2   1  -1   37.36    1.35 
   2  -1   1   37.62    1.34 
  -3   1  -1   98.51    3.54 
  -3   1  -1   99.49    3.50 
  -3   1  -1  100.95    3.52 
   3  -1   1  100.27    3.52 
   3  -1   1   97.98    3.52 
  -4   1  -1   39.73    1.50 
  -4   1  -1   40.06    1.48 
  -4   1  -1   41.33    1.46 
  -4   1  -1   40.31    1.50 
   4  -1   1   42.09    1.49 
   4  -1   1   40.04    1.48 
  -5   1  -1   60.23    2.21 
  -5   1  -1   55.90    2.18 
  -5   1  -1   61.11    2.15 
  -5   1  -1   61.31    2.22 
   5  -1   1   60.64    2.19 
   5  -1   1   61.94    2.19 
  -6   1  -1    2.23    0.17 
  -6   1  -1    2.26    0.14 
  -6   1  -1    2.19    0.19 
  -6   1  -1    2.25    0.19 
   6  -1   1    1.98    0.16 
  -7   1  -1   17.53    0.72 
  -7   1  -1   18.17    0.76 
  -7   1  -1   16.46    0.67 
  -7   1  -1   16.80    0.75 
   7  -1   1   17.37    0.73 
  -8   1  -1    0.41    0.08 
  -8   1  -1    0.31    0.12 
  -8   1  -1    0.32    0.13 
   8  -1   1    0.26    0.09 
  -9   1  -1    0.44    0.09 
  -9   1  -1    0.24    0.14 
  -9   1  -1    0.21    0.13 
   9  -1   1    0.19    0.09 
 -10   1  -1    4.38    0.27 
 -10   1  -1    4.52    0.36 
 -10   1  -1    4.68    0.36 
  10  -1   1    4.21    0.31 
 -11   1  -1    5.41    0.43 
 -11   1  -1    5.82    0.33 
 -11   1  -1    5.55    0.42 
  11  -1   1    6.17    0.40 
  11   0  -1   11.31    0.62 
 -11   0   1   10.87    0.65 
 -11   0   1   12.46    0.55 
  10   0  -1    4.95    0.35 
 -10   0   1    4.59    0.40 
 -10   0   1    4.14    0.37 
 -10   0   1    4.82    0.29 
   9   0  -1    5.55    0.36 
  -9   0   1    5.81    0.31 
  -9   0   1    5.79    0.40 
  -9   0   1    5.14    0.41 
   8   0  -1    2.13    0.21 
   8   0  -1    1.89    0.19 
  -8   0   1    1.85    0.23 
  -8   0   1    2.09    0.25 
  -8   0   1    1.64    0.16 
   7   0  -1   53.76    1.91 
   7   0  -1   52.51    1.92 
  -7   0   1   46.15    1.92 
  -7   0   1   49.52    1.85 
  -7   0   1   51.64    1.96 
   6   0  -1   40.67    1.56 
   6   0  -1   41.20    1.55 
  -6   0   1   43.30    1.55 
  -6   0   1   39.96    1.60 
  -6   0   1   40.97    1.57 
  -6   0   1   41.45    1.51 
   5   0  -1   83.50    2.99 
   5   0  -1   83.10    2.98 
  -5   0   1   83.32    3.00 
  -5   0   1   82.35    2.97 
  -5   0   1   81.10    3.02 
  -5   0   1   82.89    2.95 
   4   0  -1   10.57    0.44 
   4   0  -1   10.42    0.44 
  -4   0   1   11.32    0.48 
  -4   0   1    9.86    0.45 
  -4   0   1   10.49    0.43 
  -4   0   1   10.88    0.42 
   3   0  -1    7.59    0.32 
   3   0  -1    7.23    0.32 
  -3   0   1    7.28    0.32 
  -3   0   1    7.82    0.32 
  -3   0   1    7.84    0.30 
  -3   0   1    7.85    0.35 
   2   0  -1   24.62    0.92 
   2   0  -1   25.86    0.91 
  -2   0   1   25.36    0.90 
  -2   0   1   24.77    0.91 
  -2   0   1   24.42    0.93 
   1   0  -1  231.17    8.83 
   1   0  -1  244.19    8.85 
   1   0  -1  262.62    8.87 
  -1   0   1  254.85    8.84 
  -1   0   1  260.42    8.84 
   0   0  -1  248.82    8.18 
   0   0  -1  219.29    8.19 
   0   0  -1  229.34    8.19 
  -1   0  -1    4.55    0.17 
  -1   0  -1    4.47    0.18 
  -1   0  -1    4.24    0.17 
   1   0   1    4.33    0.17 
   1   0   1    4.46    0.17 
  -2   0  -1  183.36    6.39 
  -2   0  -1  181.57    6.36 
  -2   0  -1  179.91    6.33 
  -2   0  -1  176.82    6.36 
   2   0   1  179.56    6.32 
   2   0   1  178.66    6.36 
  -3   0  -1   14.85    0.59 
  -3   0  -1   15.30    0.55 
  -3   0  -1   15.35    0.59 
  -3   0  -1   13.06    0.56 
   3   0   1   15.36    0.57 
   3   0   1   15.43    0.57 
  -4   0  -1   31.91    1.13 
  -4   0  -1   29.46    1.15 
  -4   0  -1   30.89    1.11 
  -4   0  -1   31.22    1.16 
   4   0   1   30.19    1.13 
   4   0   1   29.82    1.13 
  -5   0  -1   33.09    1.17 
  -5   0  -1   30.91    1.14 
  -5   0  -1   29.68    1.19 
  -5   0  -1   30.80    1.19 
   5   0   1   30.34    1.16 
   5   0   1   31.29    1.17 
  -6   0  -1   66.92    2.45 
  -6   0  -1   65.77    2.45 
  -6   0  -1   63.94    2.38 
  -6   0  -1   67.82    2.41 
   6   0   1   66.47    2.42 
   6   0   1   66.64    2.42 
  -7   0  -1    5.78    0.31 
  -7   0  -1    6.55    0.37 
  -7   0  -1    5.74    0.35 
  -7   0  -1    5.87    0.29 
   7   0   1    5.98    0.32 
   7   0   1    5.96    0.32 
  -8   0  -1   15.44    0.74 
  -8   0  -1   16.42    0.75 
  -8   0  -1   16.57    0.66 
   8   0   1   16.63    0.72 
   8   0   1   16.59    0.71 
  -9   0  -1   26.93    1.16 
  -9   0  -1   28.58    1.17 
  -9   0  -1   27.31    1.05 
   9   0   1   26.08    1.11 
 -10   0  -1    4.04    0.27 
 -10   0  -1    3.92    0.35 
 -10   0  -1    4.51    0.37 
  10   0   1    3.88    0.31 
 -11   0  -1    1.21    0.23 
 -11   0  -1    1.10    0.15 
 -11   0  -1    1.47    0.27 
  11   0   1    1.39    0.22 
  11  -1  -1    3.26    0.31 
 -11   1   1    3.92    0.36 
 -11   1   1    3.75    0.27 
  10  -1  -1    0.02    0.09 
 -10   1   1   -0.01    0.14 
 -10   1   1   -0.03    0.07 
 -10   1   1    0.04    0.13 
   9  -1  -1    1.09    0.17 
  -9   1   1    0.93    0.14 
  -9   1   1    1.16    0.22 
  -9   1   1    0.77    0.17 
   8  -1  -1    0.05    0.08 
  -8   1   1    0.05    0.11 
  -8   1   1    0.16    0.07 
  -8   1   1    0.15    0.12 
   7  -1  -1    0.30    0.08 
   7  -1  -1    0.27    0.09 
  -7   1   1    0.36    0.09 
  -7   1   1    0.50    0.08 
  -7   1   1    0.29    0.12 
  -7   1   1    0.50    0.13 
   6  -1  -1   57.09    2.10 
   6  -1  -1   56.18    2.09 
  -6   1   1   57.73    2.05 
  -6   1   1   56.00    2.13 
  -6   1   1   58.03    2.11 
  -6   1   1   55.50    2.09 
   5  -1  -1   29.52    1.10 
   5  -1  -1   29.18    1.09 
  -5   1   1   28.75    1.06 
  -5   1   1   27.49    1.12 
  -5   1   1   28.50    1.10 
   4  -1  -1   15.18    0.60 
   4  -1  -1   15.01    0.61 
  -4   1   1   14.10    0.63 
  -4   1   1   16.92    0.61 
  -4   1   1   14.70    0.58 
  -4   1   1   15.12    0.61 
   3  -1  -1   98.06    3.40 
   3  -1  -1   99.34    3.39 
  -3   1   1   84.92    3.37 
  -3   1   1   99.06    3.39 
  -3   1   1   96.64    3.42 
   2  -1  -1   42.00    1.57 
  -2   1   1   44.32    1.57 
  -2   1   1   41.90    1.58 
  -2   1   1   47.54    1.56 
  -2   1   1   43.46    1.57 
   1  -1  -1   57.15    2.03 
   1  -1  -1   56.63    2.01 
   1  -1  -1   59.20    2.02 
  -1   1   1   54.39    2.01 
  -1   1   1   56.49    2.01 
  -1   1   1   61.01    2.03 
  -1   1   1   54.15    2.01 
   0  -1  -1   67.99    2.44 
   0  -1  -1   71.31    2.43 
   0   1   1   66.51    2.42 
  -1  -1  -1  115.84    4.05 
  -1  -1  -1  118.63    4.09 
  -1  -1  -1  116.11    4.10 
   1   1   1  116.88    4.06 
   1   1   1  104.80    4.03 
   1   1   1  117.04    4.08 
   1   1   1  115.86    4.03 
  -2  -1  -1   98.53    3.54 
  -2  -1  -1  101.01    3.54 
  -2  -1  -1   98.79    3.52 
   2   1   1   95.83    3.53 
   2   1   1  100.10    3.53 
   2   1   1  105.24    3.56 
   2   1   1  101.73    3.53 
  -3  -1  -1   81.47    2.87 
  -3  -1  -1   80.88    2.83 
  -3  -1  -1   78.25    2.86 
   3   1   1   78.35    2.85 
   3   1   1   81.66    2.85 
  -4  -1  -1   10.59    0.45 
  -4  -1  -1   10.21    0.42 
  -4  -1  -1   10.40    0.40 
  -4  -1  -1   10.18    0.45 
   4   1   1    9.55    0.42 
   4   1   1   10.94    0.43 
  -5  -1  -1    2.17    0.14 
  -5  -1  -1    1.84    0.12 
  -5  -1  -1    2.06    0.17 
  -5  -1  -1    2.01    0.18 
   5   1   1    2.09    0.14 
   5   1   1    2.03    0.14 
  -6  -1  -1   11.78    0.47 
  -6  -1  -1   11.74    0.54 
  -6  -1  -1   11.60    0.54 
  -6  -1  -1   10.83    0.48 
   6   1   1   11.12    0.49 
   6   1   1   11.57    0.50 
  -7  -1  -1   11.23    0.55 
  -7  -1  -1   11.29    0.47 
  -7  -1  -1   10.39    0.54 
   7   1   1   11.23    0.51 
  -8  -1  -1    9.48    0.51 
  -8  -1  -1    9.43    0.43 
  -8  -1  -1    8.91    0.50 
   8   1   1    9.61    0.47 
   8   1   1    9.88    0.46 
  -9  -1  -1    6.94    0.36 
  -9  -1  -1    7.30    0.46 
  -9  -1  -1    7.31    0.46 
   9   1   1    7.09    0.40 
 -10  -1  -1    5.65    0.43 
 -10  -1  -1    5.74    0.33 
 -10  -1  -1    6.09    0.44 
  10   1   1    6.13    0.38 
 -11  -1  -1    1.08    0.21 
 -11  -1  -1    1.14    0.23 
 -11  -1  -1    1.46    0.19 
  11   1   1    0.97    0.18 
  11  -2  -1    1.66    0.25 
 -11   2   1    1.69    0.19 
  10  -2  -1    4.78    0.36 
 -10   2   1    4.94    0.39 
 -10   2   1    5.17    0.29 
 -10   2   1    5.16    0.37 
   9  -2  -1   -0.02    0.09 
  -9   2   1    0.19    0.13 
  -9   2   1    0.05    0.11 
  -9   2   1   -0.02    0.06 
   8  -2  -1   12.00    0.58 
  -8   2   1   11.91    0.50 
  -8   2   1   11.58    0.60 
  -8   2   1   12.49    0.58 
   7  -2  -1    6.04    0.35 
  -7   2   1    7.01    0.35 
  -7   2   1    6.16    0.30 
  -7   2   1    6.74    0.37 
  -7   2   1    6.53    0.38 
   6  -2  -1   25.93    1.00 
   6  -2  -1   24.87    1.01 
  -6   2   1   25.18    1.00 
  -6   2   1   26.04    1.02 
  -6   2   1   26.06    0.96 
   5  -2  -1    2.47    0.16 
   5  -2  -1    2.44    0.17 
  -5   2   1    2.67    0.18 
  -5   2   1    2.78    0.14 
  -5   2   1    2.33    0.20 
  -5   2   1    2.55    0.17 
   4  -2  -1    7.50    0.34 
   4  -2  -1    7.69    0.33 
  -4   2   1    7.09    0.30 
  -4   2   1    7.85    0.36 
  -4   2   1    7.60    0.33 
   3  -2  -1   13.23    0.51 
  -3   2   1   12.90    0.53 
  -3   2   1   12.76    0.48 
  -3   2   1   13.12    0.51 
  -3   2   1   12.97    0.51 
   2  -2  -1  196.32    6.64 
   2  -2  -1  196.35    6.64 
  -2   2   1  187.73    6.61 
  -2   2   1  177.73    6.60 
  -2   2   1  188.26    6.60 
  -2   2   1  182.31    6.62 
  -2   2   1  186.08    6.62 
   1  -2  -1  474.73   17.52 
   1  -2  -1  501.43   17.42 
   1  -2  -1  546.31   17.33 
  -1   2   1  479.12   17.39 
  -1   2   1  484.77   17.40 
  -1   2   1  479.26   17.47 
   0  -2  -1  317.46   10.70 
   0  -2  -1  288.82   10.67 
  -1  -2  -1  104.66    3.51 
  -1  -2  -1  101.74    3.53 
   1   2   1   98.12    3.52 
   1   2   1   94.34    3.51 
   1   2   1   99.03    3.50 
  -2  -2  -1   14.32    0.54 
  -2  -2  -1   14.44    0.51 
  -2  -2  -1   14.38    0.55 
   2   2   1   14.17    0.53 
   2   2   1   14.07    0.52 
  -3  -2  -1   45.66    1.62 
  -3  -2  -1   45.68    1.67 
  -3  -2  -1   46.71    1.67 
   3   2   1   45.37    1.64 
   3   2   1   45.49    1.61 
   3   2   1   45.29    1.65 
  -4  -2  -1    2.23    0.15 
  -4  -2  -1    1.92    0.16 
  -4  -2  -1    1.98    0.11 
   4   2   1    2.03    0.13 
   4   2   1    2.50    0.14 
   4   2   1    2.16    0.10 
  -5  -2  -1    0.22    0.08 
  -5  -2  -1    0.26    0.05 
  -5  -2  -1    0.23    0.08 
   5   2   1    0.16    0.05 
   5   2   1    0.14    0.05 
  -6  -2  -1    2.18    0.21 
  -6  -2  -1    2.39    0.21 
  -6  -2  -1    2.67    0.17 
  -6  -2  -1    2.20    0.15 
   6   2   1    2.34    0.17 
   6   2   1    2.25    0.16 
  -7  -2  -1    5.56    0.35 
  -7  -2  -1    5.39    0.28 
  -7  -2  -1    5.93    0.37 
   7   2   1    5.49    0.30 
   7   2   1    5.85    0.32 
  -8  -2  -1   18.53    0.82 
  -8  -2  -1   17.90    0.72 
  -8  -2  -1   18.19    0.83 
   8   2   1   17.52    0.76 
   8   2   1   17.58    0.77 
  -9  -2  -1   12.53    0.66 
  -9  -2  -1   13.23    0.57 
  -9  -2  -1   12.86    0.68 
   9   2   1   12.56    0.61 
   9   2   1   13.52    0.61 
 -10  -2  -1    2.22    0.31 
 -10  -2  -1    2.24    0.31 
 -10  -2  -1    2.45    0.21 
  10   2   1    2.77    0.25 
 -11  -2  -1    1.09    0.16 
 -11  -2  -1    0.80    0.21 
 -11  -2  -1    0.98    0.23 
  11   2   1    1.10    0.19 
  11  -3  -1    8.54    0.52 
 -11   3   1    8.64    0.40 
  10  -3  -1    1.56    0.21 
 -10   3   1    1.51    0.23 
 -10   3   1    1.22    0.15 
 -10   3   1    1.53    0.26 
   9  -3  -1   15.73    0.77 
  -9   3   1   18.75    0.83 
  -9   3   1   16.50    0.68 
  -9   3   1   18.26    0.79 
   8  -3  -1    4.15    0.30 
  -8   3   1    4.72    0.30 
  -8   3   1    4.29    0.29 
  -8   3   1    4.44    0.23 
  -8   3   1    3.92    0.32 
   7  -3  -1    1.81    0.17 
  -7   3   1    1.64    0.17 
  -7   3   1    1.83    0.20 
  -7   3   1    2.06    0.19 
  -7   3   1    1.64    0.13 
   6  -3  -1    0.08    0.06 
  -6   3   1    0.14    0.09 
  -6   3   1    0.12    0.06 
  -6   3   1    0.05    0.04 
  -6   3   1    0.20    0.08 
   5  -3  -1    2.96    0.19 
   5  -3  -1    2.77    0.17 
  -5   3   1    2.50    0.14 
  -5   3   1    2.73    0.21 
  -5   3   1    3.12    0.19 
   4  -3  -1   64.69    2.27 
  -4   3   1   60.45    2.28 
  -4   3   1   61.13    2.21 
  -4   3   1   66.85    2.22 
  -4   3   1   59.31    2.26 
   3  -3  -1  739.41   25.13 
  -3   3   1  699.69   24.89 
  -3   3   1  729.31   24.90 
  -3   3   1  702.73   25.17 
  -3   3   1  696.49   25.10 
  -3   3   1  692.75   25.10 
   2  -3  -1  425.50   14.26 
   2  -3  -1  422.30   14.41 
  -2   3   1  399.24   14.37 
  -2   3   1  407.83   14.36 
  -2   3   1  374.44   14.37 
   1  -3  -1   99.98    3.33 
  -1   3   1   98.49    3.34 
  -1   3   1   82.63    3.32 
  -1   3   1   96.95    3.33 
   0  -3  -1   18.70    0.69 
   0   3   1   19.43    0.70 
  -1  -3  -1    0.03    0.02 
   1   3   1    0.03    0.02 
  -2  -3  -1   95.31    3.50 
  -2  -3  -1   94.29    3.51 
   2   3   1   98.20    3.49 
   2   3   1  109.89    3.47 
   2   3   1   95.70    3.47 
  -3  -3  -1    0.91    0.05 
  -3  -3  -1    1.03    0.10 
   3   3   1    0.85    0.08 
   3   3   1    0.92    0.07 
  -4  -3  -1   75.17    2.71 
  -4  -3  -1   75.17    2.71 
  -4  -3  -1   75.54    2.65 
   4   3   1   73.27    2.68 
   4   3   1   74.81    2.67 
  -5  -3  -1   38.55    1.49 
  -5  -3  -1   38.18    1.42 
  -5  -3  -1   39.43    1.49 
   5   3   1   40.58    1.38 
   5   3   1   39.44    1.45 
   5   3   1   38.81    1.46 
  -6  -3  -1    1.96    0.20 
  -6  -3  -1    1.88    0.13 
  -6  -3  -1    1.84    0.18 
   6   3   1    1.87    0.09 
   6   3   1    1.91    0.15 
   6   3   1    1.62    0.15 
  -7  -3  -1   62.92    2.28 
  -7  -3  -1   63.47    2.38 
  -7  -3  -1   62.95    2.39 
   7   3   1   64.09    2.34 
   7   3   1   61.99    2.32 
  -8  -3  -1    7.98    0.49 
  -8  -3  -1    8.50    0.39 
  -8  -3  -1    7.79    0.47 
   8   3   1    8.03    0.42 
   8   3   1    8.34    0.42 
  -9  -3  -1    1.18    0.22 
  -9  -3  -1    1.46    0.16 
  -9  -3  -1    1.13    0.21 
   9   3   1    1.44    0.18 
   9   3   1    1.36    0.18 
 -10  -3  -1    5.08    0.42 
 -10  -3  -1    5.02    0.42 
 -10  -3  -1    4.82    0.30 
  10   3   1    5.02    0.33 
  10   3   1    4.94    0.35 
 -11  -3  -1    1.71    0.31 
 -11  -3  -1    1.77    0.32 
 -11  -3  -1    1.31    0.18 
  11   3   1    1.55    0.22 
  10  -4  -1    0.27    0.12 
 -10   4   1    0.01    0.05 
 -10   4   1    0.17    0.12 
   9  -4  -1    0.24    0.10 
  -9   4   1    0.20    0.06 
  -9   4   1    0.32    0.12 
  -9   4   1    0.23    0.11 
   8  -4  -1    4.85    0.32 
  -8   4   1    4.73    0.23 
  -8   4   1    4.94    0.34 
  -8   4   1    4.66    0.31 
  -8   4   1    5.17    0.32 
   7  -4  -1    5.55    0.33 
  -7   4   1    6.02    0.36 
  -7   4   1    5.83    0.25 
  -7   4   1    5.53    0.33 
  -7   4   1    5.66    0.33 
   6  -4  -1    0.46    0.10 
  -6   4   1    0.51    0.07 
  -6   4   1    0.56    0.11 
  -6   4   1    0.59    0.12 
   5  -4  -1   26.95    1.06 
  -5   4   1   28.37    1.06 
  -5   4   1   27.10    0.99 
  -5   4   1   27.63    1.08 
   4  -4  -1  119.12    3.90 
  -4   4   1  118.84    3.82 
  -4   4   1   97.15    3.88 
  -4   4   1  108.61    3.91 
  -4   4   1  101.79    3.88 
   3  -4  -1  138.47    4.87 
  -3   4   1  134.15    4.86 
  -3   4   1  136.96    4.88 
  -3   4   1  140.61    4.86 
   2  -4  -1   44.65    1.60 
   2  -4  -1   44.83    1.62 
  -2   4   1   44.06    1.63 
  -2   4   1   47.06    1.62 
  -2   4   1   44.51    1.62 
   1  -4  -1    5.09    0.21 
  -1   4   1    5.17    0.20 
  -1   4   1    4.86    0.22 
  -1   4   1    4.77    0.20 
   0  -4  -1    2.01    0.10 
  -1  -4  -1    2.04    0.12 
  -2  -4  -1   76.69    2.68 
  -2  -4  -1   74.29    2.67 
   2   4   1   71.17    2.65 
   2   4   1   81.51    2.63 
   2   4   1   69.68    2.63 
  -3  -4  -1  165.26    5.74 
  -3  -4  -1  158.46    5.74 
   3   4   1  167.27    5.71 
   3   4   1  139.87    5.69 
   3   4   1  178.28    5.69 
  -4  -4  -1   35.35    1.32 
  -4  -4  -1   34.83    1.24 
  -4  -4  -1   35.16    1.33 
   4   4   1   35.76    1.28 
   4   4   1   32.98    1.29 
  -5  -4  -1    5.25    0.24 
  -5  -4  -1    5.66    0.32 
   5   4   1    5.52    0.28 
   5   4   1    6.32    0.28 
  -6  -4  -1   31.52    1.14 
  -6  -4  -1   30.81    1.23 
  -6  -4  -1   30.52    1.23 
   6   4   1   31.11    1.18 
   6   4   1   30.54    1.19 
  -7  -4  -1   13.76    0.57 
  -7  -4  -1   13.80    0.66 
  -7  -4  -1   14.49    0.68 
   7   4   1   13.67    0.60 
   7   4   1   14.24    0.62 
  -8  -4  -1   -0.15    0.12 
  -8  -4  -1    0.08    0.12 
  -8  -4  -1    0.06    0.06 
   8   4   1    0.07    0.07 
   8   4   1    0.12    0.07 
  -9  -4  -1    5.38    0.41 
  -9  -4  -1    5.21    0.30 
  -9  -4  -1    5.24    0.41 
   9   4   1    5.00    0.33 
   9   4   1    5.72    0.34 
 -10  -4  -1    0.10    0.16 
 -10  -4  -1    0.01    0.15 
 -10  -4  -1    0.29    0.10 
  10   4   1   -0.03    0.08 
  10   4   1    0.06    0.08 
 -11  -4  -1    1.20    0.17 
 -11  -4  -1    0.87    0.25 
 -11  -4  -1    0.99    0.24 
  11   4   1    1.65    0.22 
  11   4   1    1.68    0.22 
  10  -5  -1    1.37    0.22 
   9  -5  -1   17.58    0.79 
  -9   5   1   17.96    0.79 
  -9   5   1   16.62    0.80 
  -9   5   1   16.40    0.63 
   8  -5  -1    5.86    0.37 
  -8   5   1    7.10    0.39 
  -8   5   1    7.02    0.41 
  -8   5   1    6.35    0.26 
   7  -5  -1    3.08    0.23 
  -7   5   1    2.32    0.22 
  -7   5   1    2.66    0.24 
   6  -5  -1    4.62    0.28 
  -6   5   1    4.47    0.28 
  -6   5   1    5.89    0.32 
   5  -5  -1    2.00    0.17 
  -5   5   1    2.20    0.17 
  -5   5   1    2.12    0.18 
   4  -5  -1   11.16    0.49 
  -4   5   1   11.60    0.51 
  -4   5   1   12.31    0.49 
   3  -5  -1    8.04    0.34 
  -3   5   1    7.85    0.33 
  -3   5   1    7.57    0.35 
   2  -5  -1   71.09    2.46 
  -2   5   1   72.73    2.48 
  -2   5   1   61.54    2.45 
  -2   5   1   70.88    2.46 
   1  -5  -1    2.39    0.13 
  -1   5   1    2.78    0.12 
  -1   5   1    2.31    0.11 
  -1   5   1    2.73    0.15 
   0  -5  -1    7.24    0.29 
   0   5   1    7.63    0.27 
   0   5   1    7.60    0.27 
  -1  -5  -1  281.95   10.03 
  -2  -5  -1  180.08    5.99 
  -2  -5  -1  170.43    5.99 
   2   5   1  170.25    5.95 
   2   5   1  152.84    5.93 
   2   5   1  171.64    5.94 
  -3  -5  -1   95.80    3.46 
  -3  -5  -1   95.07    3.45 
   3   5   1  101.54    3.39 
   3   5   1   93.60    3.42 
   3   5   1   94.39    3.39 
  -4  -5  -1    0.71    0.10 
  -4  -5  -1    0.60    0.11 
   4   5   1    0.63    0.06 
   4   5   1    0.53    0.07 
   4   5   1    0.55    0.07 
  -5  -5  -1    0.06    0.07 
  -5  -5  -1    0.06    0.07 
  -5  -5  -1    0.20    0.04 
   5   5   1    0.18    0.06 
  -6  -5  -1   12.72    0.62 
  -6  -5  -1   12.95    0.62 
   6   5   1   13.04    0.57 
   6   5   1   13.39    0.55 
  -7  -5  -1    2.94    0.26 
  -7  -5  -1    3.18    0.27 
   7   5   1    2.81    0.21 
   7   5   1    2.73    0.20 
  -8  -5  -1   55.81    2.21 
  -8  -5  -1   57.80    2.22 
   8   5   1   57.42    2.15 
   8   5   1   57.07    2.13 
  -9  -5  -1    1.19    0.23 
  -9  -5  -1    1.32    0.25 
   9   5   1    1.04    0.18 
   9   5   1    1.41    0.18 
 -10  -5  -1    4.47    0.41 
 -10  -5  -1    3.52    0.39 
  10   5   1    4.30    0.32 
  10   5   1    4.62    0.32 
 -11  -5  -1    3.79    0.43 
 -11  -5  -1    4.06    0.41 
  11   5   1    3.93    0.33 
  11   5   1    3.94    0.33 
  10  -6  -1    1.97    0.24 
   9  -6  -1    1.94    0.22 
  -9   6   1    1.80    0.22 
  -9   6   1    1.38    0.21 
   8  -6  -1    0.03    0.08 
  -8   6   1   -0.09    0.07 
  -8   6   1    0.05    0.10 
   7  -6  -1    4.62    0.30 
  -7   6   1    4.91    0.32 
  -7   6   1    5.11    0.31 
   6  -6  -1    3.29    0.23 
  -6   6   1    2.64    0.22 
  -6   6   1    3.06    0.23 
   5  -6  -1    0.99    0.13 
  -5   6   1    0.98    0.12 
  -5   6   1    1.15    0.14 
   4  -6  -1    1.41    0.13 
  -4   6   1    1.47    0.12 
  -4   6   1    1.20    0.13 
   3  -6  -1    5.23    0.26 
   3  -6  -1    5.37    0.22 
  -3   6   1    5.16    0.27 
  -3   6   1    6.04    0.26 
   2  -6  -1    4.56    0.21 
  -2   6   1    3.63    0.19 
  -2   6   1    4.28    0.23 
  -2   6   1    5.15    0.21 
   1  -6  -1   20.15    0.75 
  -1   6   1   20.22    0.77 
  -1   6   1   19.78    0.73 
  -1   6   1   20.03    0.77 
   0  -6  -1   89.41    3.25 
   0   6   1   85.64    3.22 
   0   6   1  100.33    3.22 
  -1  -6  -1   59.95    2.18 
  -2  -6  -1    4.46    0.25 
  -2  -6  -1    4.82    0.25 
   2   6   1    4.65    0.19 
   2   6   1    4.97    0.19 
   2   6   1    5.14    0.22 
  -3  -6  -1    9.37    0.42 
  -3  -6  -1    9.01    0.42 
   3   6   1    8.81    0.35 
   3   6   1    8.25    0.37 
   3   6   1    8.95    0.34 
  -4  -6  -1    9.96    0.47 
  -4  -6  -1    9.79    0.46 
   4   6   1    9.85    0.40 
   4   6   1    9.37    0.39 
   4   6   1    9.80    0.42 
  -5  -6  -1   25.52    1.06 
  -5  -6  -1   25.89    1.06 
   5   6   1   25.87    0.98 
   5   6   1   26.24    1.00 
  -6  -6  -1   17.06    0.77 
  -6  -6  -1   17.29    0.78 
   6   6   1   18.25    0.72 
   6   6   1   16.56    0.69 
  -7  -6  -1   16.47    0.77 
  -7  -6  -1   17.60    0.79 
   7   6   1   15.97    0.71 
   7   6   1   16.26    0.69 
  -8  -6  -1    0.21    0.13 
  -8  -6  -1    0.16    0.14 
   8   6   1    0.23    0.08 
   8   6   1    0.06    0.08 
  -9  -6  -1    1.27    0.23 
  -9  -6  -1    1.22    0.23 
   9   6   1    1.63    0.19 
   9   6   1    1.68    0.20 
 -10  -6  -1    3.93    0.41 
 -10  -6  -1    4.44    0.42 
  10   6   1    4.20    0.32 
  10   6   1    4.30    0.32 
 -11  -6  -1    2.47    0.38 
  11   6   1    2.68    0.27 
  11   6   1    2.13    0.25 
   9  -7  -1    1.91    0.23 
  -9   7   1    1.93    0.24 
  -9   7   1    2.21    0.25 
   8  -7  -1    8.31    0.46 
  -8   7   1    8.40    0.46 
  -8   7   1    8.26    0.47 
   7  -7  -1    0.12    0.08 
  -7   7   1    0.10    0.08 
  -7   7   1    0.13    0.09 
   6  -7  -1    1.13    0.15 
  -6   7   1    0.78    0.14 
  -6   7   1    0.93    0.16 
   5  -7  -1   10.69    0.49 
  -5   7   1   10.87    0.51 
  -5   7   1   11.33    0.49 
   4  -7  -1    0.13    0.06 
  -4   7   1    0.00    0.06 
  -4   7   1    0.07    0.05 
   3  -7  -1    6.09    0.29 
  -3   7   1    5.74    0.30 
  -3   7   1    6.06    0.28 
   2  -7  -1    9.16    0.38 
  -2   7   1    9.07    0.37 
  -2   7   1    8.91    0.37 
  -2   7   1    9.55    0.41 
  -2   7   1    9.03    0.40 
   1  -7  -1   32.91    1.18 
  -1   7   1   31.76    1.17 
  -1   7   1   32.08    1.22 
  -1   7   1   32.50    1.16 
  -1   7   1   32.55    1.22 
   0  -7  -1   17.58    0.68 
   0   7   1   18.83    0.66 
  -1  -7  -1   15.02    0.61 
   1   7   1   13.93    0.52 
   1   7   1   14.38    0.52 
  -2  -7  -1   24.38    0.94 
   2   7   1   23.39    0.85 
  -3  -7  -1    0.14    0.07 
  -3  -7  -1    0.03    0.06 
   3   7   1    0.11    0.03 
   3   7   1    0.06    0.04 
   3   7   1    0.08    0.03 
  -4  -7  -1   35.76    1.40 
  -4  -7  -1   37.31    1.40 
   4   7   1   36.80    1.33 
   4   7   1   36.95    1.31 
   4   7   1   32.01    1.29 
  -5  -7  -1   19.62    0.86 
  -5  -7  -1   19.98    0.86 
   5   7   1   19.56    0.77 
   5   7   1   20.16    0.79 
  -6  -7  -1    2.00    0.22 
  -6  -7  -1    1.85    0.21 
   6   7   1    2.05    0.17 
   6   7   1    2.35    0.16 
  -7  -7  -1   -0.05    0.08 
  -7  -7  -1    0.02    0.11 
   7   7   1    0.11    0.07 
   7   7   1    0.13    0.07 
  -8  -7  -1    3.33    0.33 
  -8  -7  -1    2.90    0.31 
   8   7   1    2.51    0.22 
   8   7   1    2.79    0.23 
  -9  -7  -1    0.47    0.17 
  -9  -7  -1    0.31    0.18 
   9   7   1    0.50    0.12 
   9   7   1    0.27    0.11 
 -10  -7  -1    3.71    0.38 
 -10  -7  -1    3.47    0.41 
  10   7   1    3.88    0.30 
  10   7   1    4.17    0.31 
 -11  -7  -1    5.35    0.50 
  11   7   1    4.83    0.35 
  11   7   1    4.18    0.34 
  -9   8   1    3.88    0.32 
  -8   8   1    1.20    0.20 
  -8   8   1    0.94    0.16 
   7  -8  -1   12.81    0.63 
  -7   8   1   11.31    0.58 
  -7   8   1   13.38    0.61 
   6  -8  -1    5.68    0.33 
  -6   8   1    5.30    0.33 
  -6   8   1    6.00    0.33 
   5  -8  -1    1.45    0.16 
  -5   8   1    1.69    0.16 
  -5   8   1    1.33    0.16 
   4  -8  -1    0.18    0.07 
  -4   8   1    0.34    0.09 
  -4   8   1    0.28    0.07 
   3  -8  -1    0.60    0.10 
  -3   8   1    0.87    0.11 
  -3   8   1    0.88    0.11 
  -3   8   1    0.68    0.09 
   2  -8  -1    0.40    0.07 
  -2   8   1    0.43    0.07 
  -2   8   1    0.32    0.07 
  -2   8   1    0.32    0.07 
   1  -8  -1   97.45    3.68 
  -1   8   1  102.90    3.67 
  -1   8   1  110.85    3.67 
   0  -8  -1   48.12    1.70 
   0   8   1   44.85    1.67 
   0   8   1   48.64    1.68 
  -1  -8  -1    4.22    0.21 
  -1  -8  -1    4.73    0.27 
   1   8   1    4.69    0.19 
   1   8   1    5.14    0.19 
  -2  -8  -1   36.37    1.36 
   2   8   1   34.96    1.25 
   2   8   1   34.45    1.25 
  -3  -8  -1   10.28    0.48 
  -3  -8  -1    9.25    0.46 
   3   8   1    8.83    0.36 
   3   8   1    9.56    0.37 
   3   8   1    9.53    0.40 
   3   8   1    9.03    0.37 
  -4  -8  -1    1.93    0.19 
  -4  -8  -1    1.42    0.18 
   4   8   1    1.61    0.12 
   4   8   1    1.60    0.13 
  -5  -8  -1    7.47    0.42 
   5   8   1    6.73    0.32 
   5   8   1    7.26    0.34 
  -6  -8  -1    9.72    0.54 
  -6  -8  -1   10.03    0.54 
   6   8   1    9.66    0.45 
   6   8   1   10.11    0.44 
  -7  -8  -1    1.49    0.23 
  -7  -8  -1    1.77    0.24 
   7   8   1    1.09    0.14 
  -8  -8  -1    3.72    0.36 
  -8  -8  -1    4.43    0.38 
   8   8   1    4.64    0.29 
   8   8   1    4.26    0.29 
  -9  -8  -1    8.71    0.58 
  -9  -8  -1    8.47    0.57 
   9   8   1    9.70    0.48 
   9   8   1    9.50    0.49 
 -10  -8  -1    0.25    0.19 
 -10  -8  -1    0.31    0.18 
  10   8   1    0.33    0.11 
  10   8   1    0.38    0.12 
  -8   9   1    2.51    0.26 
  -7   9   1    0.27    0.11 
  -7   9   1    0.29    0.11 
  -6   9   1    2.09    0.21 
  -6   9   1    1.97    0.20 
  -5   9   1    1.56    0.16 
  -5   9   1    1.95    0.19 
   4  -9  -1    2.55    0.25 
  -4   9   1    2.46    0.18 
  -4   9   1    2.53    0.21 
  -4   9   1    2.89    0.21 
   3  -9  -1    7.52    0.37 
  -3   9   1    8.02    0.39 
  -3   9   1    8.46    0.37 
  -3   9   1    8.27    0.41 
   2  -9  -1   29.23    1.13 
  -2   9   1   32.44    1.12 
  -2   9   1   28.68    1.17 
   1  -9  -1   12.92    0.48 
  -1   9   1   10.71    0.45 
   0  -9  -1    0.09    0.04 
   0   9   1    0.02    0.02 
   0   9   1    0.05    0.02 
  -1  -9  -1    9.98    0.40 
  -1  -9  -1   10.13    0.48 
   1   9   1    9.82    0.37 
   1   9   1    9.69    0.37 
  -2  -9  -1    4.17    0.28 
   2   9   1    4.18    0.18 
   2   9   1    4.44    0.18 
  -3  -9  -1    2.96    0.23 
  -3  -9  -1    3.22    0.25 
   3   9   1    3.14    0.15 
   3   9   1    3.12    0.15 
  -4  -9  -1    4.52    0.31 
  -4  -9  -1    4.04    0.30 
   4   9   1    4.32    0.21 
   4   9   1    4.29    0.23 
  -5  -9  -1   15.91    0.75 
  -5  -9  -1   15.73    0.75 
   5   9   1   15.82    0.66 
   5   9   1   16.22    0.64 
  -6  -9  -1    1.98    0.24 
  -6  -9  -1    2.06    0.25 
   6   9   1    2.40    0.17 
   6   9   1    1.92    0.17 
  -7  -9  -1    6.41    0.44 
  -7  -9  -1    6.62    0.46 
   7   9   1    6.55    0.35 
   7   9   1    7.63    0.38 
  -8  -9  -1    3.61    0.37 
  -8  -9  -1    4.20    0.38 
   8   9   1    3.41    0.25 
   8   9   1    3.94    0.28 
  -9  -9  -1    0.06    0.17 
  -9  -9  -1    0.35    0.16 
   9   9   1    0.34    0.11 
   9   9   1    0.50    0.12 
 -10  -9  -1    0.85    0.24 
  10   9   1    1.55    0.21 
  10   9   1    1.39    0.21 
  -7  10   1    3.18    0.28 
  -7  10   1    3.96    0.30 
  -6  10   1    8.61    0.44 
  -6  10   1    7.97    0.46 
  -5  10   1    0.43    0.12 
  -5  10   1    0.25    0.09 
  -4  10   1    7.23    0.36 
  -4  10   1    7.68    0.41 
  -4  10   1    7.27    0.39 
  -3  10   1    6.83    0.33 
  -3  10   1    6.98    0.38 
  -3  10   1    7.01    0.37 
  -2  10   1    1.87    0.13 
  -1  10   1    0.38    0.07 
   0 -10  -1   12.17    0.60 
   0 -10  -1   13.37    0.53 
   0  10   1   13.67    0.50 
  -1 -10  -1    0.59    0.12 
  -1 -10  -1    0.69    0.08 
   1  10   1    0.93    0.06 
   1  10   1    0.83    0.06 
  -2 -10  -1   10.41    0.52 
   2  10   1   10.72    0.41 
   2  10   1   10.66    0.41 
  -3 -10  -1   12.32    0.60 
  -3 -10  -1   11.94    0.59 
   3  10   1   11.98    0.47 
  -4 -10  -1    4.97    0.35 
  -4 -10  -1    5.13    0.35 
   4  10   1    4.97    0.23 
  -5 -10  -1    0.50    0.14 
  -5 -10  -1    0.51    0.15 
   5  10   1    0.35    0.08 
   5  10   1    0.46    0.08 
  -6 -10  -1    0.49    0.16 
  -6 -10  -1    0.38    0.14 
   6  10   1    0.33    0.09 
   6  10   1    0.21    0.07 
  -7 -10  -1    0.01    0.12 
  -7 -10  -1    0.03    0.12 
   7  10   1    0.06    0.08 
   7  10   1    0.14    0.07 
  -8 -10  -1    4.23    0.41 
  -8 -10  -1    5.08    0.43 
   8  10   1    4.63    0.30 
   8  10   1    4.80    0.30 
  -9 -10  -1    0.55    0.32 
  -9 -10  -1    0.67    0.22 
   9  10   1    0.51    0.13 
   9  10   1    0.72    0.14 
  -7  11   1    0.30    0.12 
  -6  11   1    0.38    0.11 
  -6  11   1    0.35    0.12 
  -5  11   1    1.30    0.18 
  -5  11   1    1.42    0.17 
  -4  11   1    0.90    0.15 
  -4  11   1    0.76    0.14 
  -4  11   1    1.04    0.14 
  -3  11   1    6.81    0.33 
  -2  11   1    2.08    0.15 
  -1  11   1    0.64    0.08 
   0 -11  -1    3.56    0.27 
   0  11   1    3.84    0.18 
  -1 -11  -1    7.70    0.43 
   1  11   1    7.49    0.30 
  -2 -11  -1   27.73    1.14 
  -2 -11  -1   27.00    1.14 
   2  11   1   26.74    0.99 
  -3 -11  -1   -0.01    0.09 
  -3 -11  -1   -0.03    0.08 
   3  11   1    0.09    0.04 
  -4 -11  -1    1.55    0.22 
  -4 -11  -1    1.72    0.22 
   4  11   1    1.32    0.11 
  -5 -11  -1    3.75    0.33 
  -5 -11  -1    4.04    0.33 
   5  11   1    3.68    0.21 
  -6 -11  -1    0.45    0.16 
  -6 -11  -1    0.38    0.15 
   6  11   1    0.89    0.12 
   6  11   1    0.41    0.10 
  -7 -11  -1    1.29    0.25 
  -7 -11  -1    0.91    0.21 
   7  11   1    1.16    0.16 
   7  11   1    1.29    0.15 
  -8 -11  -1    3.24    0.37 
  -8 -11  -1    4.07    0.40 
   8  11   1    3.47    0.26 
   8  11   1    3.47    0.25 
  -6  12   1    1.62    0.21 
  -5  12   1    2.39    0.25 
  -5  12   1    2.44    0.22 
  -4  12   1   10.24    0.48 
  -3  12   1    5.28    0.29 
  -2  12   1    0.36    0.07 
   1 -12  -1   11.39    0.59 
  -1  12   1   11.66    0.47 
   0 -12  -1    6.14    0.39 
   0  12   1    6.93    0.29 
  -1 -12  -1    0.70    0.15 
   1  12   1    0.58    0.07 
  -2 -12  -1   10.77    0.57 
  -2 -12  -1   10.73    0.57 
   2  12   1   10.55    0.41 
  -3 -12  -1    2.07    0.24 
  -3 -12  -1    2.16    0.25 
   3  12   1    2.16    0.13 
  -4 -12  -1    1.78    0.24 
  -4 -12  -1    2.13    0.26 
   4  12   1    2.34    0.14 
  -5 -12  -1    3.85    0.36 
  -5 -12  -1    3.90    0.35 
   5  12   1    4.04    0.22 
  -6 -12  -1    5.41    0.45 
  -6 -12  -1    6.11    0.45 
   6  12   1    6.38    0.31 
  -7 -12  -1    1.08    0.23 
  -7 -12  -1    1.16    0.26 
   7  12   1    1.22    0.15 
  -4  13   1    0.06    0.08 
  -3  13   1    0.26    0.08 
  -2  13   1    0.06    0.06 
   1 -13  -1    1.23    0.20 
  -1  13   1    1.56    0.12 
   0 -13  -1    4.30    0.34 
   0  13   1    4.76    0.22 
  -1 -13  -1    6.94    0.45 
   1  13   1    7.57    0.31 
  -2 -13  -1    3.19    0.30 
  -2 -13  -1    2.82    0.28 
   2  13   1    3.25    0.16 
  -3 -13  -1    0.14    0.12 
  -3 -13  -1    0.10    0.11 
   3  13   1    0.05    0.04 
  -4 -13  -1    2.65    0.30 
  -4 -13  -1    2.40    0.28 
   4  13   1    2.93    0.16 
  -5 -13  -1    3.68    0.35 
  -5 -13  -1    3.79    0.36 
   5  13   1    3.79    0.21 
  -6 -13  -1    1.19    0.25 
   6  13   1    1.75    0.16 
  -2  14   1    0.02    0.06 
   1 -14  -1    5.17    0.39 
  -1  14   1    5.23    0.26 
   0 -14  -1    7.62    0.48 
   0  14   1    7.50    0.33 
  -1 -14  -1    1.68    0.23 
   1  14   1    1.71    0.12 
  -2 -14  -1    1.34    0.23 
  -2 -14  -1    1.96    0.26 
   2  14   1    2.01    0.12 
  -3 -14  -1   -0.17    0.09 
  -3 -14  -1    0.03    0.11 
   3  14   1   -0.05    0.03 
  -4 -14  -1    0.16    0.14 
   4  14   1    0.07    0.05 
   2  13  -2    1.06    0.12 
   1  13  -2    0.32    0.07 
   0  13  -2    2.28    0.17 
  -1  13  -2    1.67    0.16 
   5  12  -2    0.73    0.12 
  -5 -12   2    0.68    0.20 
   4  12  -2    0.13    0.07 
  -4 -12   2    0.01    0.12 
   3  12  -2    1.50    0.14 
  -3 -12   2    1.37    0.25 
  -3 -12   2    1.54    0.23 
   2  12  -2    0.51    0.08 
  -2 -12   2    0.36    0.16 
   1  12  -2    5.99    0.30 
  -1 -12   2    6.60    0.44 
   0  12  -2    0.01    0.05 
   0 -12   2    0.01    0.11 
  -1  12  -2    2.46    0.18 
   1 -12   2    2.38    0.26 
  -2  12  -2    0.02    0.06 
   2 -12   2    0.20    0.11 
  -3  12  -2    1.94    0.19 
  -4  12  -2    3.38    0.25 
   6  11  -2    1.29    0.16 
  -6 -11   2    1.22    0.25 
   5  11  -2    0.10    0.07 
  -5 -11   2    0.12    0.14 
  -5 -11   2    0.26    0.14 
   4  11  -2    0.18    0.07 
  -4 -11   2    0.20    0.13 
  -4 -11   2    0.23    0.12 
   3  11  -2    3.48    0.20 
  -3 -11   2    3.17    0.31 
  -3 -11   2    2.97    0.31 
   2  11  -2    4.95    0.25 
  -2 -11   2    5.05    0.38 
   1  11  -2    0.17    0.06 
  -1 -11   2    0.29    0.13 
   0  11  -2    2.65    0.17 
   0 -11   2    2.46    0.26 
  -1  11  -2    1.64    0.14 
   1 -11   2    1.48    0.22 
  -2  11  -2    5.71    0.29 
   2 -11   2    4.91    0.36 
  -3  11  -2   10.42    0.48 
  -4  11  -2   10.10    0.48 
  -4  11  -2   10.09    0.55 
  -5  11  -2    0.06    0.08 
  -5  11  -2    0.13    0.11 
   7  10  -2    3.09    0.24 
  -7 -10   2    2.43    0.32 
   6  10  -2    1.32    0.16 
  -6 -10   2    1.13    0.23 
  -6 -10   2    0.80    0.21 
   5  10  -2    7.50    0.37 
  -5 -10   2    6.74    0.48 
  -5 -10   2    7.83    0.51 
   4  10  -2    0.09    0.06 
  -4 -10   2    0.00    0.09 
  -4 -10   2    0.13    0.11 
   3  10  -2    2.95    0.18 
  -3 -10   2    2.99    0.28 
  -3 -10   2    2.57    0.27 
   2  10  -2    2.75    0.17 
  -2 -10   2    2.42    0.26 
   1  10  -2    0.00    0.04 
  -1 -10   2   -0.10    0.08 
   0  10  -2   10.74    0.44 
   0 -10   2   10.13    0.55 
  -1  10  -2   32.57    1.18 
   1 -10   2   30.38    1.29 
  -2  10  -2   29.12    1.11 
  -3  10  -2    0.92    0.16 
  -3  10  -2    0.81    0.13 
  -4  10  -2    0.51    0.13 
  -4  10  -2    0.56    0.10 
  -5  10  -2    0.22    0.12 
  -5  10  -2    0.15    0.11 
  -5  10  -2    0.15    0.08 
  -6  10  -2    0.15    0.10 
  -6  10  -2    0.20    0.12 
  -6  10  -2    0.27    0.18 
  -7  10  -2    0.39    0.14 
  -7  10  -2    0.41    0.13 
   8   9  -2    6.36    0.39 
   8   9  -2    6.70    0.38 
  -8  -9   2    6.78    0.50 
   7   9  -2    1.28    0.17 
   7   9  -2    1.62    0.18 
  -7  -9   2    1.53    0.29 
  -7  -9   2    1.88    0.28 
   6   9  -2    0.59    0.11 
  -6  -9   2    0.38    0.15 
  -6  -9   2    0.56    0.18 
   5   9  -2    1.20    0.14 
  -5  -9   2    1.14    0.21 
  -5  -9   2    1.06    0.20 
   4   9  -2   20.80    0.82 
  -4  -9   2   19.85    0.94 
  -4  -9   2   22.02    0.97 
   3   9  -2    4.64    0.23 
  -3  -9   2    4.13    0.32 
  -3  -9   2    4.22    0.32 
   2   9  -2    1.85    0.13 
  -2  -9   2    1.64    0.21 
   1   9  -2   13.58    0.55 
  -1  -9   2   14.12    0.67 
   0   9  -2   47.14    1.70 
   0  -9   2   46.30    1.81 
  -1   9  -2    0.31    0.06 
   1  -9   2    0.17    0.10 
  -2   9  -2    0.23    0.09 
  -2   9  -2    0.21    0.06 
  -3   9  -2    0.50    0.12 
  -3   9  -2    0.30    0.07 
  -4   9  -2    1.70    0.16 
  -4   9  -2    1.78    0.20 
  -4   9  -2    1.64    0.19 
  -5   9  -2    5.07    0.34 
  -5   9  -2    4.73    0.32 
  -5   9  -2    4.92    0.30 
  -6   9  -2   15.61    0.74 
  -6   9  -2   16.56    0.72 
  -6   9  -2   16.56    0.75 
  -7   9  -2   13.64    0.67 
  -7   9  -2   14.33    0.71 
  -7   9  -2   14.52    0.69 
  -8   9  -2   -0.02    0.10 
  -8   9  -2    0.08    0.11 
   9   8  -2    0.65    0.14 
   9   8  -2    0.67    0.14 
  -9  -8   2    0.64    0.21 
   8   8  -2    1.70    0.20 
   8   8  -2    1.58    0.19 
  -8  -8   2    1.70    0.28 
  -8  -8   2    1.48    0.28 
   7   8  -2    1.17    0.16 
   7   8  -2    1.06    0.16 
  -7  -8   2    1.38    0.24 
  -7  -8   2    0.92    0.21 
   6   8  -2    2.21    0.19 
   6   8  -2    2.54    0.19 
  -6  -8   2    2.15    0.25 
  -6  -8   2    2.54    0.30 
   5   8  -2   24.90    0.96 
  -5  -8   2   24.83    1.07 
  -5  -8   2   23.12    1.07 
   4   8  -2   18.56    0.71 
   4   8  -2   18.19    0.71 
  -4  -8   2   17.11    0.82 
  -4  -8   2   17.09    0.82 
   3   8  -2   -0.03    0.04 
   3   8  -2   -0.04    0.04 
  -3  -8   2    0.00    0.08 
   2   8  -2    2.52    0.15 
  -2  -8   2    2.46    0.23 
   1   8  -2    8.21    0.35 
  -1  -8   2    8.51    0.45 
   0   8  -2    2.64    0.15 
   0  -8   2    2.37    0.21 
  -1   8  -2    6.59    0.29 
  -2   8  -2   25.49    0.96 
  -2   8  -2   25.29    1.03 
  -3   8  -2    0.04    0.07 
  -3   8  -2    0.04    0.05 
  -4   8  -2   16.74    0.69 
  -4   8  -2   16.09    0.72 
  -4   8  -2   16.88    0.73 
  -5   8  -2   30.46    1.28 
  -5   8  -2   33.00    1.26 
  -5   8  -2   33.93    1.30 
  -6   8  -2    4.51    0.31 
  -6   8  -2    4.75    0.32 
  -6   8  -2    4.70    0.30 
  -7   8  -2    0.26    0.10 
  -7   8  -2    0.03    0.09 
  -7   8  -2    0.13    0.09 
  -8   8  -2   -0.13    0.08 
  -8   8  -2   -0.03    0.10 
   9   7  -2    0.39    0.12 
   9   7  -2    0.35    0.12 
  -9  -7   2    0.37    0.18 
   8   7  -2    0.03    0.09 
   8   7  -2    0.01    0.08 
  -8  -7   2   -0.08    0.13 
  -8  -7   2   -0.09    0.11 
   7   7  -2    2.18    0.20 
   7   7  -2    2.13    0.19 
  -7  -7   2    1.76    0.26 
  -7  -7   2    2.20    0.28 
   6   7  -2   14.86    0.66 
   6   7  -2   15.78    0.65 
  -6  -7   2   15.06    0.77 
  -6  -7   2   15.62    0.76 
   5   7  -2   10.25    0.46 
   5   7  -2   10.48    0.46 
  -5  -7   2    9.79    0.54 
  -5  -7   2   10.31    0.55 
   4   7  -2    8.17    0.37 
   4   7  -2    8.04    0.37 
  -4  -7   2    8.79    0.47 
  -4  -7   2    7.49    0.44 
   3   7  -2   40.40    1.46 
   3   7  -2   37.77    1.46 
  -3  -7   2   41.59    1.57 
   2   7  -2   18.65    0.72 
   2   7  -2   19.51    0.73 
  -2  -7   2   19.47    0.82 
   1   7  -2    0.73    0.08 
  -1  -7   2    0.76    0.13 
   0   7  -2   33.08    1.19 
   0  -7   2   31.92    1.27 
  -1   7  -2   29.53    1.18 
  -1   7  -2   31.12    1.12 
  -2   7  -2    9.33    0.45 
  -2   7  -2    9.78    0.40 
  -3   7  -2   14.00    0.61 
  -3   7  -2   13.05    0.57 
  -3   7  -2   14.95    0.62 
  -4   7  -2   18.64    0.74 
  -4   7  -2   17.01    0.73 
  -4   7  -2   15.86    0.69 
  -5   7  -2    2.16    0.18 
  -5   7  -2    2.28    0.20 
  -5   7  -2    1.95    0.19 
  -6   7  -2   10.54    0.51 
  -6   7  -2   10.97    0.54 
  -6   7  -2   10.99    0.53 
  -7   7  -2    1.65    0.19 
  -7   7  -2    1.34    0.18 
  -7   7  -2    1.54    0.20 
  -8   7  -2    0.15    0.10 
  -8   7  -2   -0.06    0.08 
  -8   7  -2    0.05    0.10 
  -9   7  -2    5.21    0.38 
  -9   7  -2    5.45    0.38 
  10   6  -2    0.32    0.13 
  10   6  -2    0.30    0.13 
 -10  -6   2    0.48    0.19 
   9   6  -2    0.02    0.09 
   9   6  -2    0.00    0.08 
  -9  -6   2    0.01    0.11 
  -9  -6   2    0.04    0.16 
   8   6  -2   10.03    0.51 
   8   6  -2   10.28    0.50 
  -8  -6   2    9.59    0.60 
  -8  -6   2    9.67    0.58 
   7   6  -2    3.88    0.26 
   7   6  -2    3.27    0.25 
  -7  -6   2    4.04    0.34 
  -7  -6   2    4.01    0.35 
   6   6  -2   27.78    1.08 
   6   6  -2   27.52    1.06 
  -6  -6   2   26.12    1.16 
  -6  -6   2   26.60    1.15 
   5   6  -2   50.35    1.81 
   5   6  -2   47.58    1.79 
  -5  -6   2   47.70    1.88 
  -5  -6   2   48.47    1.90 
   4   6  -2   41.85    1.55 
  -4  -6   2   42.83    1.64 
  -4  -6   2   41.43    1.64 
   3   6  -2    3.75    0.20 
   3   6  -2    4.03    0.20 
  -3  -6   2    3.92    0.26 
  -3  -6   2    3.94    0.26 
   2   6  -2   33.69    1.24 
   2   6  -2   34.86    1.23 
  -2  -6   2   32.78    1.32 
   1   6  -2   55.77    2.01 
   1   6  -2   56.02    2.01 
  -1  -6   2   56.30    2.09 
   0   6  -2    0.66    0.07 
   0   6  -2    0.65    0.07 
   0  -6   2    0.64    0.10 
   0  -6   2    0.70    0.05 
  -1   6  -2    2.72    0.14 
  -1   6  -2    2.56    0.18 
  -1   6  -2    2.18    0.13 
   1  -6   2    2.41    0.11 
  -2   6  -2   20.50    0.85 
  -2   6  -2   21.97    0.81 
   2  -6   2   21.74    0.78 
  -3   6  -2   21.60    0.80 
  -3   6  -2   19.97    0.83 
  -3   6  -2   20.38    0.83 
  -4   6  -2   16.55    0.70 
  -4   6  -2   16.03    0.67 
  -4   6  -2   17.61    0.71 
  -5   6  -2   11.95    0.54 
  -5   6  -2   11.83    0.52 
  -5   6  -2   11.48    0.54 
  -6   6  -2    2.09    0.19 
  -6   6  -2    2.66    0.22 
  -6   6  -2    2.21    0.20 
  -7   6  -2    0.99    0.17 
  -7   6  -2    1.02    0.16 
  -7   6  -2    1.22    0.17 
  -8   6  -2   16.81    0.76 
  -8   6  -2   15.89    0.76 
  -8   6  -2   17.46    0.76 
  -9   6  -2    4.36    0.33 
  -9   6  -2    4.12    0.32 
  -9   6  -2    3.24    0.31 
 -10   6  -2    0.13    0.11 
  10   5  -2    0.45    0.14 
  10   5  -2    0.57    0.15 
 -10  -5   2    0.77    0.21 
   9   5  -2    0.06    0.09 
   9   5  -2    0.15    0.10 
  -9  -5   2   -0.16    0.14 
  -9  -5   2   -0.15    0.12 
   8   5  -2    3.16    0.26 
   8   5  -2    2.77    0.23 
  -8  -5   2    2.54    0.29 
  -8  -5   2    3.17    0.32 
   7   5  -2   57.73    2.17 
   7   5  -2   59.96    2.16 
  -7  -5   2   55.34    2.23 
  -7  -5   2   58.01    2.26 
   6   5  -2   28.00    1.13 
   6   5  -2   28.81    1.11 
  -6  -5   2   28.63    1.19 
  -6  -5   2   29.13    1.22 
   5   5  -2    6.10    0.31 
   5   5  -2    7.10    0.34 
  -5  -5   2    7.16    0.39 
  -5  -5   2    6.03    0.39 
   4   5  -2   21.18    0.80 
   4   5  -2   19.68    0.79 
  -4  -5   2   19.14    0.85 
  -4  -5   2   21.67    0.88 
   3   5  -2   29.68    1.11 
   3   5  -2   32.25    1.13 
  -3  -5   2   28.23    1.17 
  -3  -5   2   30.07    1.19 
   2   5  -2    7.87    0.31 
   2   5  -2    7.59    0.31 
   2   5  -2    7.54    0.32 
  -2  -5   2    7.02    0.37 
   1   5  -2    1.61    0.09 
   1   5  -2    1.36    0.09 
   1   5  -2    1.42    0.08 
  -1  -5   2    1.54    0.13 
   0   5  -2   33.30    1.18 
   0   5  -2   32.12    1.18 
   0  -5   2   32.22    1.24 
  -1   5  -2    1.13    0.08 
  -1   5  -2    0.89    0.10 
  -1   5  -2    1.17    0.08 
   1  -5   2    1.17    0.06 
  -2   5  -2    4.21    0.20 
  -2   5  -2    4.49    0.24 
  -2   5  -2    4.34    0.24 
   2  -5   2    4.73    0.18 
  -3   5  -2   60.31    2.17 
  -3   5  -2   62.85    2.17 
  -3   5  -2   54.52    2.13 
   3  -5   2   58.99    2.10 
  -4   5  -2    7.73    0.34 
  -4   5  -2    7.31    0.36 
  -4   5  -2    7.38    0.36 
   4  -5   2    7.35    0.32 
  -5   5  -2    3.05    0.21 
  -5   5  -2    3.25    0.20 
  -5   5  -2    2.61    0.21 
   5  -5   2    3.03    0.18 
  -6   5  -2    2.80    0.23 
  -6   5  -2    3.48    0.22 
  -6   5  -2    3.15    0.23 
   6  -5   2    3.03    0.19 
  -7   5  -2    0.04    0.08 
  -7   5  -2    0.20    0.10 
  -7   5  -2    0.00    0.06 
   7  -5   2   -0.04    0.05 
  -8   5  -2   10.77    0.55 
  -8   5  -2   10.48    0.54 
  -8   5  -2   11.32    0.54 
  -9   5  -2    4.04    0.32 
  -9   5  -2    4.46    0.32 
  -9   5  -2    4.16    0.31 
 -10   5  -2    4.54    0.35 
  10   4  -2    0.42    0.14 
  10   4  -2    0.59    0.15 
 -10  -4   2    0.51    0.13 
 -10  -4   2    0.22    0.17 
 -10  -4   2    0.57    0.22 
   9   4  -2    7.69    0.44 
   9   4  -2    7.59    0.42 
  -9  -4   2    6.75    0.51 
  -9  -4   2    6.43    0.45 
  -9  -4   2    6.82    0.50 
   8   4  -2   10.94    0.54 
   8   4  -2   11.16    0.53 
  -8  -4   2   11.25    0.60 
  -8  -4   2   10.31    0.53 
  -8  -4   2   10.71    0.63 
   7   4  -2   10.27    0.50 
   7   4  -2   11.01    0.50 
  -7  -4   2    9.55    0.54 
  -7  -4   2   10.06    0.58 
  -7  -4   2   10.85    0.46 
   6   4  -2    6.87    0.34 
   6   4  -2    6.39    0.35 
  -6  -4   2    6.66    0.31 
  -6  -4   2    6.36    0.39 
  -6  -4   2    7.23    0.43 
   5   4  -2    0.64    0.11 
   5   4  -2    0.88    0.11 
  -5  -4   2    1.10    0.17 
  -5  -4   2    0.97    0.15 
  -5  -4   2    0.94    0.09 
   4   4  -2    0.92    0.10 
   4   4  -2    0.79    0.10 
  -4  -4   2    0.92    0.08 
  -4  -4   2    0.73    0.12 
  -4  -4   2    0.99    0.14 
   3   4  -2   10.83    0.43 
  -3  -4   2   10.65    0.48 
  -3  -4   2   10.21    0.47 
   2   4  -2   49.03    1.82 
   2   4  -2   52.28    1.82 
  -2  -4   2   50.61    1.87 
   1   4  -2   99.35    3.46 
   1   4  -2   99.30    3.43 
   1   4  -2   93.50    3.44 
  -1  -4   2   97.51    3.50 
   0   4  -2   49.38    1.82 
   0   4  -2   50.12    1.81 
   0   4  -2   49.57    1.85 
   0  -4   2   54.04    1.86 
  -1   4  -2    0.10    0.04 
  -1   4  -2    0.17    0.03 
   1  -4   2    0.12    0.02 
  -2   4  -2   21.87    0.88 
  -2   4  -2   24.02    0.86 
  -2   4  -2   23.28    0.88 
   2  -4   2   23.06    0.83 
  -3   4  -2   55.24    1.96 
  -3   4  -2   55.43    1.99 
  -3   4  -2   52.37    1.98 
   3  -4   2   54.06    1.93 
  -4   4  -2   25.40    0.96 
  -4   4  -2   24.04    0.96 
  -4   4  -2   24.44    0.94 
   4  -4   2   24.80    0.92 
  -5   4  -2    0.13    0.08 
  -5   4  -2    0.25    0.03 
  -5   4  -2    0.30    0.07 
  -5   4  -2    0.27    0.08 
   5  -4   2    0.39    0.07 
  -6   4  -2    3.78    0.25 
  -6   4  -2    3.76    0.25 
  -6   4  -2    3.67    0.24 
  -6   4  -2    3.63    0.16 
   6  -4   2    3.77    0.22 
  -7   4  -2   18.36    0.73 
  -7   4  -2   16.04    0.72 
  -7   4  -2   16.66    0.62 
  -7   4  -2   15.72    0.72 
   7  -4   2   16.38    0.70 
  -8   4  -2   26.83    1.08 
  -8   4  -2   26.65    1.06 
  -8   4  -2   25.75    1.06 
  -8   4  -2   24.70    0.94 
   8  -4   2   24.48    1.03 
  -9   4  -2   14.69    0.57 
  -9   4  -2   15.46    0.72 
  -9   4  -2   15.39    0.71 
  -9   4  -2   14.99    0.71 
   9  -4   2   14.66    0.68 
 -10   4  -2    0.21    0.12 
 -10   4  -2    0.12    0.11 
 -10   4  -2    0.00    0.04 
  10  -4   2   -0.08    0.09 
 -11   4  -2    4.41    0.35 
  11   3  -2    0.11    0.12 
 -11  -3   2   -0.15    0.15 
 -11  -3   2   -0.16    0.09 
  10   3  -2    2.64    0.27 
 -10  -3   2    2.13    0.31 
 -10  -3   2    2.10    0.34 
 -10  -3   2    2.54    0.23 
   9   3  -2    1.10    0.19 
   9   3  -2    1.11    0.18 
  -9  -3   2    0.72    0.13 
  -9  -3   2    0.94    0.20 
  -9  -3   2    1.16    0.24 
   8   3  -2    0.16    0.09 
   8   3  -2    0.06    0.07 
  -8  -3   2    0.08    0.07 
  -8  -3   2    0.09    0.11 
  -8  -3   2    0.02    0.14 
   7   3  -2   14.01    0.65 
   7   3  -2   14.57    0.64 
  -7  -3   2   15.02    0.69 
  -7  -3   2   15.33    0.61 
  -7  -3   2   14.74    0.73 
   6   3  -2   28.14    1.09 
   6   3  -2   28.59    1.11 
  -6  -3   2   28.33    1.14 
  -6  -3   2   26.83    1.16 
  -6  -3   2   28.23    1.06 
   5   3  -2    4.75    0.25 
   5   3  -2    4.81    0.27 
  -5  -3   2    4.85    0.31 
  -5  -3   2    4.78    0.23 
  -5  -3   2    4.93    0.29 
   4   3  -2    0.12    0.05 
   4   3  -2    0.12    0.04 
  -4  -3   2    0.14    0.07 
  -4  -3   2    0.23    0.04 
  -4  -3   2    0.12    0.07 
   3   3  -2  127.33    4.71 
   3   3  -2  127.55    4.70 
  -3  -3   2  138.16    4.68 
  -3  -3   2  136.83    4.75 
  -3  -3   2  135.27    4.76 
   2   3  -2  118.69    4.11 
   2   3  -2  117.90    4.10 
  -2  -3   2  111.70    4.15 
   1   3  -2   16.14    0.59 
   1   3  -2   15.97    0.60 
  -1  -3   2   16.12    0.64 
   0   3  -2   12.44    0.48 
   0   3  -2   12.31    0.51 
   0   3  -2   13.03    0.46 
   0  -3   2   13.06    0.51 
  -1   3  -2    3.64    0.19 
  -1   3  -2    3.65    0.16 
  -2   3  -2    9.13    0.39 
  -2   3  -2    9.35    0.39 
  -2   3  -2    8.99    0.37 
   2  -3   2    9.74    0.35 
  -3   3  -2    1.74    0.12 
  -3   3  -2    1.75    0.08 
  -3   3  -2    1.68    0.11 
  -3   3  -2    1.60    0.07 
  -3   3  -2    1.75    0.13 
   3  -3   2    1.75    0.10 
  -4   3  -2   47.54    1.76 
  -4   3  -2   46.74    1.73 
  -4   3  -2   46.87    1.75 
  -4   3  -2   48.83    1.69 
   4  -3   2   47.83    1.72 
  -5   3  -2    6.40    0.34 
  -5   3  -2    7.34    0.36 
  -5   3  -2    7.33    0.29 
  -5   3  -2    7.67    0.36 
   5  -3   2    7.94    0.33 
  -6   3  -2   77.26    2.85 
  -6   3  -2   77.00    2.76 
  -6   3  -2   74.84    2.83 
  -6   3  -2   78.71    2.85 
   6  -3   2   81.47    2.82 
  -7   3  -2    3.45    0.24 
  -7   3  -2    3.21    0.25 
  -7   3  -2    3.79    0.26 
  -7   3  -2    3.26    0.17 
   7  -3   2    3.25    0.22 
  -8   3  -2    1.27    0.19 
  -8   3  -2    1.32    0.18 
  -8   3  -2    1.35    0.12 
  -8   3  -2    1.30    0.17 
   8  -3   2    1.46    0.16 
  -9   3  -2    0.09    0.11 
  -9   3  -2    0.15    0.11 
  -9   3  -2   -0.03    0.05 
   9  -3   2   -0.04    0.07 
 -10   3  -2   -0.01    0.05 
 -10   3  -2    0.01    0.11 
 -10   3  -2    0.04    0.11 
  10  -3   2    0.11    0.09 
 -11   3  -2   -0.03    0.06 
 -11   3  -2    0.11    0.13 
  11  -3   2    0.18    0.10 
  11   2  -2    0.52    0.16 
 -11  -2   2    0.52    0.21 
 -11  -2   2    0.57    0.14 
  10   2  -2    0.31    0.13 
 -10  -2   2    0.12    0.15 
 -10  -2   2    0.15    0.09 
 -10  -2   2    0.23    0.18 
   9   2  -2    0.68    0.13 
   9   2  -2    1.14    0.18 
  -9  -2   2    0.69    0.18 
  -9  -2   2    0.71    0.19 
  -9  -2   2    0.80    0.13 
   8   2  -2    8.25    0.44 
   8   2  -2    7.30    0.40 
  -8  -2   2    7.45    0.38 
  -8  -2   2    7.94    0.45 
  -8  -2   2    7.77    0.50 
   7   2  -2    0.00    0.07 
   7   2  -2    0.00    0.05 
  -7  -2   2   -0.04    0.09 
  -7  -2   2    0.21    0.07 
  -7  -2   2    0.16    0.12 
   6   2  -2    0.07    0.05 
   6   2  -2    0.07    0.07 
  -6  -2   2    0.11    0.09 
  -6  -2   2    0.08    0.08 
  -6  -2   2    0.05    0.05 
   5   2  -2   45.29    1.69 
   5   2  -2   45.11    1.70 
  -5  -2   2   43.41    1.74 
  -5  -2   2   47.97    1.73 
  -5  -2   2   46.62    1.66 
   4   2  -2   37.89    1.43 
   4   2  -2   38.56    1.44 
  -4  -2   2   40.42    1.48 
  -4  -2   2   38.44    1.40 
  -4  -2   2   38.19    1.46 
   3   2  -2    3.46    0.19 
   3   2  -2    3.61    0.18 
  -3  -2   2    3.87    0.22 
  -3  -2   2    3.67    0.17 
  -3  -2   2    3.76    0.20 
   2   2  -2    1.62    0.10 
  -2  -2   2    1.86    0.09 
   1   2  -2   35.58    1.25 
   1   2  -2   35.55    1.26 
  -1  -2   2   33.79    1.28 
   0   2  -2    2.13    0.12 
   0   2  -2    2.33    0.09 
   0   2  -2    2.02    0.10 
   0  -2   2    2.08    0.12 
  -1   2  -2   50.64    1.83 
  -1   2  -2   50.93    1.79 
  -1   2  -2   50.49    1.83 
  -1   2  -2   52.06    1.82 
  -2   2  -2   17.35    0.67 
  -2   2  -2   17.68    0.65 
  -2   2  -2   17.84    0.68 
  -2   2  -2   18.85    0.69 
   2  -2   2   18.28    0.65 
  -3   2  -2    2.62    0.12 
  -3   2  -2    2.76    0.14 
  -3   2  -2    2.67    0.16 
  -3   2  -2    2.51    0.15 
   3  -2   2    2.71    0.13 
  -4   2  -2   15.82    0.64 
  -4   2  -2   16.35    0.65 
  -4   2  -2   16.16    0.60 
  -4   2  -2   16.24    0.63 
   4  -2   2   16.24    0.62 
   4  -2   2   16.07    0.63 
  -5   2  -2   12.27    0.54 
  -5   2  -2   12.56    0.53 
  -5   2  -2   12.10    0.51 
  -5   2  -2   12.51    0.47 
   5  -2   2   11.94    0.51 
   5  -2   2   12.44    0.51 
  -6   2  -2   12.79    0.56 
  -6   2  -2   12.09    0.49 
  -6   2  -2   11.73    0.55 
  -6   2  -2   13.30    0.55 
   6  -2   2   12.56    0.53 
  -7   2  -2    5.45    0.32 
  -7   2  -2    5.67    0.30 
  -7   2  -2    5.02    0.25 
  -7   2  -2    5.11    0.33 
   7  -2   2    4.93    0.29 
  -8   2  -2    0.87    0.11 
  -8   2  -2    1.02    0.19 
  -8   2  -2    1.13    0.18 
  -8   2  -2    1.29    0.16 
   8  -2   2    0.86    0.14 
  -9   2  -2    2.24    0.25 
  -9   2  -2    2.47    0.17 
  -9   2  -2    2.78    0.26 
   9  -2   2    2.52    0.22 
 -10   2  -2   -0.01    0.12 
 -10   2  -2    0.16    0.07 
 -10   2  -2   -0.01    0.10 
  10  -2   2    0.19    0.09 
 -11   2  -2    7.92    0.70 
 -11   2  -2    7.28    0.36 
 -11   2  -2    7.39    0.49 
  11  -2   2    7.59    0.45 
  11   1  -2    2.38    0.29 
 -11  -1   2    2.36    0.24 
 -11  -1   2    2.19    0.34 
  10   1  -2    9.54    0.54 
 -10  -1   2   10.38    0.49 
 -10  -1   2    9.69    0.60 
 -10  -1   2    9.46    0.57 
   9   1  -2   11.20    0.58 
  -9  -1   2   11.59    0.64 
  -9  -1   2   11.49    0.52 
  -9  -1   2   10.45    0.59 
   8   1  -2   17.53    0.79 
   8   1  -2   17.52    0.76 
  -8  -1   2   17.22    0.84 
  -8  -1   2   18.63    0.73 
  -8  -1   2   17.30    0.81 
   7   1  -2   22.29    0.92 
   7   1  -2   22.76    0.90 
  -7  -1   2   22.64    0.94 
  -7  -1   2   20.73    0.86 
  -7  -1   2   22.00    0.97 
   6   1  -2   63.75    2.39 
   6   1  -2   64.61    2.41 
  -6  -1   2   68.39    2.36 
  -6  -1   2   66.96    2.46 
  -6  -1   2   62.85    2.42 
   5   1  -2   11.69    0.51 
   5   1  -2   11.34    0.50 
  -5  -1   2   11.87    0.47 
  -5  -1   2   12.14    0.50 
  -5  -1   2   11.82    0.55 
  -5  -1   2   11.54    0.52 
   4   1  -2   63.49    2.32 
   4   1  -2   65.46    2.34 
  -4  -1   2   62.92    2.32 
  -4  -1   2   66.78    2.32 
  -4  -1   2   66.80    2.38 
  -4  -1   2   59.98    2.34 
  -4  -1   2   65.72    2.30 
   3   1  -2    0.25    0.05 
   3   1  -2    0.12    0.04 
  -3  -1   2    0.18    0.06 
  -3  -1   2    0.14    0.03 
  -3  -1   2    0.18    0.04 
  -3  -1   2    0.11    0.03 
  -3  -1   2    0.22    0.05 
   2   1  -2   25.70    0.96 
   2   1  -2   26.67    0.97 
  -2  -1   2   26.62    0.98 
  -2  -1   2   25.36    0.95 
  -2  -1   2   27.34    0.99 
   1   1  -2   84.25    2.95 
   1   1  -2   83.19    2.95 
  -1  -1   2   83.23    2.97 
   0   1  -2 1000.00   34.59 
   0   1  -2  920.66   37.10 
   0   1  -2  989.88   34.85 
   0   1  -2  972.10   35.92 
   0  -1   2  935.28   33.94 
  -1   1  -2   41.68    1.52 
  -1   1  -2   43.41    1.49 
  -1   1  -2   42.43    1.51 
  -1   1  -2   41.70    1.50 
  -2   1  -2    4.46    0.20 
  -2   1  -2    4.63    0.21 
  -2   1  -2    4.73    0.19 
  -2   1  -2    4.79    0.20 
   2  -1   2    4.82    0.19 
  -3   1  -2    0.70    0.06 
  -3   1  -2    0.88    0.07 
  -3   1  -2    0.72    0.09 
  -3   1  -2    0.73    0.08 
   3  -1   2    0.69    0.07 
   3  -1   2    0.73    0.06 
  -4   1  -2    0.93    0.12 
  -4   1  -2    1.06    0.10 
  -4   1  -2    1.18    0.10 
  -4   1  -2    1.24    0.08 
   4  -1   2    1.13    0.09 
   4  -1   2    1.07    0.09 
  -5   1  -2   12.68    0.53 
  -5   1  -2   12.40    0.53 
  -5   1  -2   11.77    0.47 
  -5   1  -2   11.58    0.50 
   5  -1   2   12.43    0.50 
   5  -1   2   12.22    0.51 
  -6   1  -2   26.11    1.06 
  -6   1  -2   27.37    0.99 
  -6   1  -2   26.52    1.03 
  -6   1  -2   26.30    1.05 
   6  -1   2   26.79    1.03 
   6  -1   2   26.66    1.03 
  -7   1  -2   61.12    2.27 
  -7   1  -2   61.39    2.24 
  -7   1  -2   60.37    2.27 
  -7   1  -2   59.57    2.19 
   7  -1   2   60.17    2.24 
   7  -1   2   61.41    2.26 
  -8   1  -2   15.47    0.73 
  -8   1  -2   16.11    0.65 
  -8   1  -2   16.83    0.74 
   8  -1   2   16.27    0.70 
  -9   1  -2    2.89    0.28 
  -9   1  -2    2.94    0.29 
  -9   1  -2    2.69    0.20 
   9  -1   2    2.95    0.24 
 -10   1  -2   10.70    0.49 
 -10   1  -2   10.47    0.58 
 -10   1  -2   11.16    0.60 
  10  -1   2   11.77    0.57 
 -11   1  -2    7.73    0.49 
 -11   1  -2    7.86    0.51 
 -11   1  -2    8.20    0.40 
  11  -1   2    7.93    0.47 
  11   0  -2    6.77    0.45 
 -11   0   2    6.71    0.38 
 -11   0   2    6.61    0.68 
  10   0  -2    5.46    0.39 
 -10   0   2    6.55    0.35 
 -10   0   2    6.14    0.47 
 -10   0   2    5.55    0.42 
   9   0  -2    0.08    0.09 
  -9   0   2    0.52    0.16 
  -9   0   2    0.23    0.16 
  -9   0   2    0.40    0.10 
   8   0  -2    0.22    0.09 
  -8   0   2    0.10    0.13 
  -8   0   2    0.11    0.08 
  -8   0   2    0.16    0.12 
   7   0  -2    2.91    0.21 
   7   0  -2    2.73    0.22 
  -7   0   2    2.51    0.26 
  -7   0   2    2.81    0.19 
  -7   0   2    2.61    0.24 
   6   0  -2   46.14    1.65 
   6   0  -2   43.98    1.66 
  -6   0   2   43.45    1.67 
  -6   0   2   43.71    1.61 
  -6   0   2   43.08    1.63 
  -6   0   2   43.14    1.70 
   5   0  -2   60.49    2.20 
   5   0  -2   59.81    2.22 
  -5   0   2   58.45    2.21 
  -5   0   2   60.74    2.19 
  -5   0   2   61.64    2.26 
  -5   0   2   61.07    2.17 
   4   0  -2    3.45    0.19 
   4   0  -2    3.75    0.21 
  -4   0   2    3.45    0.23 
  -4   0   2    3.35    0.18 
  -4   0   2    3.84    0.19 
  -4   0   2    3.94    0.21 
   3   0  -2   25.71    1.03 
   3   0  -2   27.50    1.05 
  -3   0   2   28.44    1.07 
  -3   0   2   29.22    1.04 
  -3   0   2   28.91    1.02 
   2   0  -2  146.58    5.17 
   2   0  -2  146.58    5.17 
  -2   0   2  150.34    5.17 
  -2   0   2  145.42    5.15 
  -2   0   2  146.38    5.17 
  -2   0   2  144.80    5.19 
   1   0  -2    0.51    0.05 
   1   0  -2    0.34    0.04 
   1   0  -2    0.32    0.03 
  -1   0   2    0.34    0.05 
  -1   0   2    0.32    0.04 
  -1   0   2    0.35    0.05 
   0   0  -2   59.12    2.02 
   0   0  -2   58.18    2.02 
   0   0  -2   56.31    2.02 
   0   0  -2   55.46    2.02 
  -1   0  -2  134.19    4.76 
  -1   0  -2  134.19    4.79 
  -1   0  -2  136.62    4.84 
  -1   0  -2  141.33    4.78 
   1   0   2  129.63    4.74 
  -3   0  -2   27.13    0.96 
  -3   0  -2   25.59    0.99 
  -3   0  -2   26.19    0.98 
  -3   0  -2   27.27    1.00 
   3   0   2   27.41    0.98 
   3   0   2   26.53    0.97 
  -4   0  -2   26.04    1.01 
  -4   0  -2   26.17    1.00 
  -4   0  -2   25.69    0.96 
  -4   0  -2   26.06    0.98 
   4   0   2   26.47    0.98 
   4   0   2   26.87    0.98 
  -5   0  -2  125.45    4.46 
  -5   0  -2  124.82    4.45 
  -5   0  -2  122.14    4.42 
  -5   0  -2  125.04    4.40 
   5   0   2  128.09    4.43 
   5   0   2  120.74    4.43 
  -6   0  -2    0.39    0.12 
  -6   0  -2    0.35    0.07 
  -6   0  -2    0.27    0.06 
  -6   0  -2    0.17    0.08 
   6   0   2    0.32    0.07 
   6   0   2    0.55    0.09 
  -7   0  -2    0.13    0.09 
  -7   0  -2    0.45    0.09 
  -7   0  -2    0.39    0.07 
  -7   0  -2    0.17    0.10 
   7   0   2    0.19    0.07 
   7   0   2    0.36    0.08 
  -8   0  -2   10.99    0.56 
  -8   0  -2   11.59    0.57 
  -8   0  -2   11.67    0.48 
   8   0   2   10.60    0.54 
   8   0   2   10.35    0.51 
  -9   0  -2    9.48    0.52 
  -9   0  -2   10.07    0.55 
  -9   0  -2    9.32    0.44 
   9   0   2    9.92    0.49 
 -10   0  -2    3.03    0.22 
 -10   0  -2    2.68    0.30 
 -10   0  -2    2.67    0.31 
  10   0   2    3.13    0.25 
 -11   0  -2    0.06    0.12 
 -11   0  -2    0.22    0.16 
 -11   0  -2    0.15    0.10 
  11   0   2    0.02    0.09 
  11  -1  -2   -0.01    0.12 
 -11   1   2    0.17    0.10 
  10  -1  -2   -0.04    0.10 
 -10   1   2    0.05    0.09 
 -10   1   2   -0.14    0.12 
 -10   1   2    0.08    0.14 
   9  -1  -2    1.35    0.19 
  -9   1   2    1.39    0.24 
  -9   1   2    1.35    0.16 
  -9   1   2    1.32    0.22 
   8  -1  -2    0.20    0.10 
  -8   1   2    0.30    0.13 
  -8   1   2    0.30    0.13 
  -8   1   2    0.35    0.08 
   7  -1  -2    0.22    0.08 
   7  -1  -2    0.00    0.07 
  -7   1   2    0.44    0.14 
  -7   1   2    0.26    0.07 
  -7   1   2    0.42    0.11 
  -7   1   2    0.26    0.11 
   6  -1  -2  100.47    3.58 
   6  -1  -2  101.29    3.61 
  -6   1   2  109.53    3.66 
  -6   1   2   91.11    3.58 
  -6   1   2  101.04    3.55 
  -6   1   2   94.08    3.60 
   5  -1  -2   15.45    0.64 
   5  -1  -2   16.61    0.63 
  -5   1   2   15.13    0.60 
  -5   1   2   13.52    0.62 
  -5   1   2   16.52    0.68 
   4  -1  -2   48.29    1.75 
   4  -1  -2   48.37    1.74 
  -4   1   2   51.18    1.72 
  -4   1   2   49.91    1.78 
  -4   1   2   44.03    1.73 
  -4   1   2   44.36    1.74 
   3  -1  -2   11.93    0.47 
   3  -1  -2   11.62    0.48 
  -3   1   2   11.62    0.45 
  -3   1   2   11.77    0.47 
  -3   1   2   11.72    0.50 
  -3   1   2   12.15    0.47 
   2  -1  -2    0.14    0.04 
   2  -1  -2    0.13    0.03 
   2  -1  -2    0.12    0.03 
  -2   1   2    0.09    0.03 
  -2   1   2    0.12    0.03 
  -2   1   2    0.11    0.03 
  -2   1   2    0.19    0.05 
   1  -1  -2    1.95    0.10 
   1  -1  -2    1.88    0.09 
   1  -1  -2    1.93    0.11 
  -1   1   2    1.96    0.09 
  -1   1   2    1.93    0.09 
   0  -1  -2  109.45    4.02 
   0  -1  -2  114.12    4.00 
   0  -1  -2  112.84    4.01 
   0  -1  -2  125.36    4.01 
   0   1   2  108.91    3.97 
   0   1   2  111.15    3.98 
   0   1   2  115.39    4.00 
   0   1   2  109.26    4.00 
  -1  -1  -2  287.43    9.75 
  -1  -1  -2  267.88    9.64 
  -1  -1  -2  274.82    9.67 
   1   1   2  276.68    9.65 
   1   1   2  266.61    9.64 
   1   1   2  271.18    9.70 
  -2  -1  -2  325.44   11.10 
  -2  -1  -2  318.72   11.16 
  -2  -1  -2  311.21   11.12 
   2   1   2  318.21   11.07 
   2   1   2  294.97   11.07 
   2   1   2  318.01   11.10 
  -3  -1  -2  108.04    3.88 
  -3  -1  -2  109.99    3.89 
  -3  -1  -2  111.15    3.87 
  -3  -1  -2  108.30    3.90 
   3   1   2  109.21    3.88 
   3   1   2  111.74    3.88 
  -4  -1  -2    3.17    0.16 
  -4  -1  -2    3.09    0.19 
  -4  -1  -2    3.12    0.15 
  -4  -1  -2    3.35    0.20 
   4   1   2    2.97    0.17 
   4   1   2    3.16    0.17 
  -5  -1  -2    2.66    0.16 
  -5  -1  -2    2.89    0.19 
  -5  -1  -2    2.94    0.15 
  -5  -1  -2    2.47    0.20 
   5   1   2    2.83    0.17 
   5   1   2    2.51    0.16 
  -6  -1  -2    2.67    0.17 
  -6  -1  -2    3.03    0.23 
  -6  -1  -2    2.98    0.18 
  -6  -1  -2    2.92    0.22 
   6   1   2    2.95    0.19 
   6   1   2    2.87    0.19 
  -7  -1  -2    2.37    0.23 
  -7  -1  -2    2.54    0.24 
  -7  -1  -2    2.37    0.16 
   7   1   2    2.11    0.18 
   7   1   2    2.53    0.19 
  -8  -1  -2    0.60    0.15 
  -8  -1  -2    0.57    0.14 
  -8  -1  -2    0.66    0.10 
   8   1   2    0.57    0.11 
   8   1   2    0.60    0.11 
  -9  -1  -2    8.14    0.48 
  -9  -1  -2    7.65    0.38 
  -9  -1  -2    7.77    0.48 
   9   1   2    8.27    0.43 
 -10  -1  -2    3.43    0.25 
 -10  -1  -2    3.68    0.33 
 -10  -1  -2    4.45    0.36 
  10   1   2    3.82    0.30 
 -11  -1  -2    0.34    0.16 
 -11  -1  -2    0.04    0.09 
 -11  -1  -2    0.05    0.14 
  11   1   2   -0.06    0.09 
 -12  -1  -2    0.15    0.18 
 -12  -1  -2    0.16    0.11 
  12   1   2    0.30    0.14 
  11  -2  -2    9.91    0.58 
 -11   2   2    9.87    0.47 
  10  -2  -2    0.84    0.18 
 -10   2   2    0.41    0.17 
 -10   2   2    0.60    0.11 
   9  -2  -2    3.01    0.28 
  -9   2   2    4.09    0.35 
  -9   2   2    3.21    0.22 
  -9   2   2    3.23    0.28 
   8  -2  -2   28.41    1.17 
  -8   2   2   29.27    1.20 
  -8   2   2   27.03    1.16 
  -8   2   2   29.01    1.08 
   7  -2  -2   20.32    0.89 
  -7   2   2   20.61    0.82 
  -7   2   2   20.88    0.92 
  -7   2   2   23.61    0.88 
   6  -2  -2    0.88    0.11 
   6  -2  -2    1.00    0.13 
  -6   2   2    0.93    0.16 
  -6   2   2    1.07    0.13 
  -6   2   2    1.01    0.11 
   5  -2  -2    3.75    0.23 
   5  -2  -2    4.05    0.21 
  -5   2   2    4.11    0.23 
  -5   2   2    3.49    0.19 
  -5   2   2    3.61    0.22 
  -5   2   2    3.54    0.25 
   4  -2  -2   10.74    0.44 
   4  -2  -2    9.98    0.42 
  -4   2   2   10.86    0.43 
  -4   2   2    8.52    0.42 
  -4   2   2   10.56    0.46 
  -4   2   2    9.32    0.39 
   3  -2  -2  173.66    6.12 
   3  -2  -2  176.99    6.14 
  -3   2   2  167.32    6.15 
  -3   2   2  177.54    6.10 
  -3   2   2  173.03    6.12 
   2  -2  -2   83.65    3.05 
   2  -2  -2   86.56    3.03 
  -2   2   2   85.99    3.03 
  -2   2   2   86.01    3.06 
  -2   2   2   87.48    3.03 
   1  -2  -2   76.21    2.56 
   1  -2  -2   65.70    2.56 
   1  -2  -2   72.01    2.54 
  -1   2   2   71.66    2.53 
  -1   2   2   71.69    2.55 
  -1   2   2   75.94    2.54 
  -1   2   2   71.78    2.53 
   0  -2  -2   52.35    1.81 
   0  -2  -2   47.82    1.82 
   0  -2  -2   52.40    1.81 
   0   2   2   49.17    1.81 
   0   2   2   51.65    1.81 
   0   2   2   54.78    1.81 
  -1  -2  -2  325.07   11.31 
  -1  -2  -2  325.30   11.40 
   1   2   2  320.41   11.32 
   1   2   2  315.14   11.29 
  -2  -2  -2    3.47    0.16 
  -2  -2  -2    3.53    0.17 
  -2  -2  -2    3.60    0.14 
   2   2   2    3.44    0.16 
   2   2   2    3.67    0.15 
   2   2   2    3.35    0.15 
  -3  -2  -2   17.37    0.66 
  -3  -2  -2   18.29    0.69 
  -3  -2  -2   18.38    0.71 
   3   2   2   17.92    0.65 
   3   2   2   17.68    0.68 
   3   2   2   18.79    0.68 
  -4  -2  -2    7.50    0.35 
  -4  -2  -2    7.39    0.34 
  -4  -2  -2    7.16    0.30 
   4   2   2    7.60    0.29 
   4   2   2    7.07    0.32 
   4   2   2    7.44    0.32 
  -5  -2  -2    4.86    0.22 
  -5  -2  -2    4.56    0.23 
  -5  -2  -2    4.86    0.28 
  -5  -2  -2    5.00    0.28 
   5   2   2    4.68    0.24 
   5   2   2    4.65    0.24 
  -6  -2  -2    4.90    0.24 
  -6  -2  -2    5.02    0.31 
  -6  -2  -2    4.81    0.25 
  -6  -2  -2    5.26    0.32 
   6   2   2    5.49    0.27 
   6   2   2    5.21    0.27 
  -7  -2  -2    2.27    0.16 
  -7  -2  -2    2.69    0.25 
  -7  -2  -2    2.17    0.22 
   7   2   2    2.56    0.19 
   7   2   2    2.39    0.18 
  -8  -2  -2   25.96    1.09 
  -8  -2  -2   24.61    1.09 
  -8  -2  -2   26.78    1.00 
   8   2   2   26.29    1.05 
   8   2   2   25.76    1.04 
  -9  -2  -2    4.61    0.38 
  -9  -2  -2    4.96    0.38 
  -9  -2  -2    4.80    0.28 
   9   2   2    5.19    0.32 
   9   2   2    5.01    0.31 
 -10  -2  -2    0.24    0.15 
 -10  -2  -2    0.37    0.16 
 -10  -2  -2    0.16    0.09 
  10   2   2    0.21    0.10 
 -11  -2  -2   -0.02    0.15 
 -11  -2  -2    0.11    0.10 
 -11  -2  -2    0.17    0.15 
  11   2   2    0.10    0.09 
 -12  -2  -2    1.85    0.33 
 -12  -2  -2    1.91    0.23 
  12   2   2    1.63    0.24 
  11  -3  -2    2.22    0.28 
 -11   3   2    2.20    0.19 
  10  -3  -2    6.67    0.43 
 -10   3   2    7.15    0.48 
 -10   3   2    6.94    0.34 
   9  -3  -2   15.61    0.76 
  -9   3   2   16.89    0.66 
  -9   3   2   16.22    0.79 
   8  -3  -2    7.50    0.42 
  -8   3   2    7.33    0.33 
  -8   3   2    6.80    0.44 
  -8   3   2    7.16    0.40 
   7  -3  -2    9.00    0.47 
  -7   3   2    8.77    0.49 
  -7   3   2   10.41    0.48 
  -7   3   2    9.56    0.40 
   6  -3  -2    3.49    0.23 
  -6   3   2    3.48    0.27 
  -6   3   2    3.84    0.24 
  -6   3   2    3.69    0.18 
  -6   3   2    3.14    0.23 
   5  -3  -2    0.19    0.07 
   5  -3  -2    0.04    0.04 
  -5   3   2    0.01    0.05 
  -5   3   2    0.06    0.07 
  -5   3   2   -0.03    0.03 
  -5   3   2    0.00    0.06 
   4  -3  -2   58.41    2.11 
   4  -3  -2   58.52    2.10 
  -4   3   2   58.89    2.09 
  -4   3   2   55.33    2.12 
  -4   3   2   56.75    2.05 
  -4   3   2   58.98    2.10 
   3  -3  -2  301.15   10.09 
   3  -3  -2  291.92   10.08 
  -3   3   2  294.63   10.11 
  -3   3   2  263.26   10.06 
  -3   3   2  297.56   10.10 
  -3   3   2  269.35   10.07 
  -3   3   2  289.43   10.08 
   2  -3  -2    0.58    0.05 
  -2   3   2    0.61    0.05 
  -2   3   2    0.58    0.07 
  -2   3   2    0.61    0.06 
  -2   3   2    0.52    0.03 
   1  -3  -2   62.61    2.22 
  -1   3   2   60.96    2.20 
  -1   3   2   63.50    2.21 
   0  -3  -2   18.41    0.62 
   0  -3  -2   17.38    0.62 
   0   3   2   16.30    0.60 
   0   3   2   14.53    0.60 
   0   3   2   17.94    0.62 
  -1  -3  -2    2.30    0.11 
  -1  -3  -2    2.09    0.10 
   1   3   2    2.25    0.09 
   1   3   2    2.11    0.09 
  -2  -3  -2   51.53    1.88 
  -2  -3  -2   50.89    1.86 
   2   3   2   53.75    1.84 
   2   3   2   51.72    1.86 
  -3  -3  -2  100.86    3.48 
  -3  -3  -2   97.16    3.44 
  -3  -3  -2   98.82    3.50 
   3   3   2   93.56    3.46 
   3   3   2   98.89    3.47 
  -4  -3  -2   24.54    0.90 
  -4  -3  -2   24.19    0.96 
  -4  -3  -2   24.97    0.95 
   4   3   2   25.52    0.92 
   4   3   2   24.32    0.93 
  -5  -3  -2    4.13    0.25 
  -5  -3  -2    3.73    0.19 
  -5  -3  -2    3.84    0.24 
   5   3   2    4.14    0.16 
   5   3   2    3.73    0.21 
   5   3   2    4.09    0.22 
  -6  -3  -2   57.99    2.22 
  -6  -3  -2   60.81    2.23 
  -6  -3  -2   59.14    2.14 
   6   3   2   60.01    2.11 
   6   3   2   59.68    2.18 
   6   3   2   59.46    2.18 
  -7  -3  -2   30.56    1.13 
  -7  -3  -2   32.04    1.24 
  -7  -3  -2   28.86    1.21 
   7   3   2   29.84    1.17 
   7   3   2   29.06    1.17 
  -8  -3  -2   18.47    0.85 
  -8  -3  -2   19.13    0.85 
  -8  -3  -2   18.40    0.74 
   8   3   2   18.53    0.79 
   8   3   2   18.45    0.78 
  -9  -3  -2   -0.04    0.12 
  -9  -3  -2   -0.03    0.06 
  -9  -3  -2   -0.02    0.13 
   9   3   2    0.07    0.07 
   9   3   2    0.13    0.09 
 -10  -3  -2    1.62    0.25 
 -10  -3  -2    1.52    0.28 
 -10  -3  -2    1.46    0.18 
  10   3   2    1.53    0.19 
  10   3   2    1.66    0.21 
 -11  -3  -2    0.57    0.20 
 -11  -3  -2    0.50    0.20 
 -11  -3  -2    0.81    0.14 
  11   3   2    0.65    0.16 
 -12  -3  -2    4.13    0.44 
 -12  -3  -2    4.85    0.33 
  12   3   2    4.58    0.36 
  10  -4  -2    0.23    0.12 
 -10   4   2    0.09    0.14 
 -10   4   2    0.16    0.07 
   9  -4  -2    7.17    0.44 
  -9   4   2    7.96    0.34 
  -9   4   2    7.61    0.47 
   8  -4  -2   21.28    0.95 
  -8   4   2   21.61    0.97 
  -8   4   2   24.78    0.97 
  -8   4   2   24.27    1.10 
  -8   4   2   21.15    0.84 
   7  -4  -2    8.88    0.45 
  -7   4   2    8.49    0.35 
  -7   4   2    8.66    0.42 
  -7   4   2    8.17    0.43 
  -7   4   2    7.91    0.45 
   6  -4  -2    2.31    0.19 
  -6   4   2    2.22    0.13 
  -6   4   2    2.29    0.18 
  -6   4   2    2.25    0.21 
  -6   4   2    2.41    0.18 
   5  -4  -2    2.46    0.18 
  -5   4   2    2.51    0.17 
  -5   4   2    2.49    0.17 
  -5   4   2    2.34    0.12 
  -5   4   2    2.08    0.18 
   4  -4  -2   19.48    0.75 
  -4   4   2   17.50    0.73 
  -4   4   2   18.45    0.67 
  -4   4   2   18.81    0.67 
  -4   4   2   19.08    0.76 
  -4   4   2   19.35    0.72 
   3  -4  -2   26.26    0.97 
   3  -4  -2   26.85    1.01 
  -3   4   2   25.30    0.98 
  -3   4   2   29.47    1.00 
  -3   4   2   26.04    1.02 
   2  -4  -2  240.77    8.31 
   2  -4  -2  256.74    8.32 
  -2   4   2  229.58    8.32 
  -2   4   2  240.07    8.29 
  -2   4   2  215.02    8.30 
   1  -4  -2   67.80    2.35 
  -1   4   2   64.17    2.33 
  -1   4   2   67.81    2.35 
  -1   4   2   66.74    2.33 
  -1   4   2   63.04    2.33 
   0  -4  -2    0.03    0.02 
   0   4   2    0.00    0.01 
   0   4   2    0.02    0.01 
   0   4   2    0.08    0.01 
  -1  -4  -2   76.93    2.76 
  -1  -4  -2   78.59    2.76 
  -2  -4  -2   76.47    2.68 
  -2  -4  -2   76.80    2.70 
   2   4   2   76.80    2.65 
   2   4   2   67.10    2.65 
   2   4   2   79.63    2.67 
  -3  -4  -2  137.28    5.02 
   3   4   2  136.41    4.99 
   3   4   2  137.28    5.00 
   3   4   2  155.76    4.99 
  -4  -4  -2    2.93    0.20 
  -4  -4  -2    2.72    0.12 
  -4  -4  -2    2.72    0.18 
   4   4   2    2.91    0.15 
   4   4   2    2.73    0.16 
  -5  -4  -2   42.83    1.56 
  -5  -4  -2   45.03    1.65 
  -5  -4  -2   44.82    1.64 
   5   4   2   43.09    1.60 
   5   4   2   41.32    1.59 
  -6  -4  -2   47.46    1.86 
  -6  -4  -2   50.34    1.86 
  -6  -4  -2   48.44    1.77 
   6   4   2   50.46    1.81 
   6   4   2   47.92    1.81 
  -7  -4  -2   27.48    1.15 
  -7  -4  -2   27.48    1.05 
  -7  -4  -2   27.07    1.14 
   7   4   2   28.22    1.10 
   7   4   2   28.49    1.09 
  -8  -4  -2    4.21    0.34 
  -8  -4  -2    3.78    0.33 
  -8  -4  -2    4.44    0.24 
   8   4   2    3.77    0.26 
   8   4   2    3.63    0.25 
  -9  -4  -2    1.03    0.15 
  -9  -4  -2    1.08    0.21 
  -9  -4  -2    1.17    0.22 
   9   4   2    1.03    0.17 
   9   4   2    1.04    0.16 
 -10  -4  -2    1.84    0.29 
 -10  -4  -2    1.68    0.19 
 -10  -4  -2    1.97    0.30 
  10   4   2    2.15    0.22 
  10   4   2    2.17    0.22 
 -11  -4  -2   13.07    0.73 
 -11  -4  -2   12.95    0.73 
 -11  -4  -2   12.90    0.59 
  11   4   2   12.69    0.64 
  11   4   2   12.18    0.64 
  10  -5  -2    0.73    0.16 
   9  -5  -2    9.91    0.53 
  -9   5   2    9.78    0.38 
  -9   5   2    7.63    0.56 
  -9   5   2   10.09    0.55 
   8  -5  -2    2.85    0.26 
  -8   5   2    3.02    0.15 
  -8   5   2    2.63    0.27 
  -8   5   2    3.39    0.26 
   7  -5  -2    1.12    0.16 
  -7   5   2    1.12    0.17 
  -7   5   2    1.08    0.14 
  -7   5   2    0.92    0.07 
  -7   5   2    0.90    0.15 
   6  -5  -2    1.90    0.19 
  -6   5   2    1.97    0.20 
  -6   5   2    2.44    0.18 
  -6   5   2    2.27    0.19 
   5  -5  -2   15.45    0.67 
  -5   5   2   16.73    0.65 
  -5   5   2   16.75    0.69 
  -5   5   2   15.49    0.66 
   4  -5  -2  113.69    4.17 
  -4   5   2  115.87    4.18 
  -4   5   2  117.57    4.15 
  -4   5   2  119.90    4.17 
   3  -5  -2  172.76    5.83 
   3  -5  -2  164.26    5.87 
  -3   5   2  155.56    5.87 
  -3   5   2  161.09    5.85 
  -3   5   2  175.39    5.86 
   2  -5  -2  130.69    4.62 
  -2   5   2  118.09    4.61 
  -2   5   2  130.39    4.61 
  -2   5   2  143.57    4.64 
  -2   5   2  130.71    4.63 
   1  -5  -2   13.08    0.49 
  -1   5   2   13.16    0.49 
  -1   5   2   10.72    0.46 
  -1   5   2   13.13    0.48 
  -1   5   2   12.79    0.47 
   0  -5  -2   42.89    1.58 
   0   5   2   45.37    1.55 
   0   5   2   44.18    1.55 
  -1  -5  -2   35.25    1.29 
  -2  -5  -2   46.06    1.67 
  -2  -5  -2   46.38    1.66 
   2   5   2   44.52    1.64 
   2   5   2   45.41    1.61 
  -3  -5  -2    0.45    0.08 
  -3  -5  -2    0.60    0.08 
   3   5   2    0.55    0.05 
   3   5   2    0.49    0.06 
   3   5   2    0.45    0.05 
  -4  -5  -2   27.90    1.08 
  -4  -5  -2   28.83    1.08 
   4   5   2   26.64    1.02 
   4   5   2   28.88    1.04 
   4   5   2   26.39    1.02 
  -5  -5  -2   18.59    0.79 
  -5  -5  -2   18.42    0.69 
  -5  -5  -2   18.97    0.78 
   5   5   2   19.61    0.74 
   5   5   2   17.73    0.72 
  -6  -5  -2   29.21    1.09 
  -6  -5  -2   28.02    1.18 
  -6  -5  -2   29.40    1.18 
   6   5   2   30.02    1.12 
   6   5   2   30.73    1.14 
  -7  -5  -2   11.23    0.56 
  -7  -5  -2   10.83    0.54 
   7   5   2    9.90    0.47 
   7   5   2   10.49    0.49 
  -8  -5  -2    1.27    0.21 
  -8  -5  -2    1.05    0.20 
   8   5   2    1.56    0.16 
   8   5   2    1.12    0.16 
  -9  -5  -2    0.71    0.19 
  -9  -5  -2    0.82    0.21 
   9   5   2    0.77    0.14 
   9   5   2    0.64    0.13 
 -10  -5  -2    9.04    0.57 
 -10  -5  -2    8.71    0.56 
  10   5   2    8.93    0.49 
  10   5   2    8.66    0.47 
 -11  -5  -2    8.39    0.60 
 -11  -5  -2    8.31    0.56 
  11   5   2    8.22    0.48 
  11   5   2    8.33    0.48 
  10  -6  -2    0.07    0.12 
   9  -6  -2    0.55    0.14 
  -9   6   2    0.22    0.12 
  -9   6   2    0.31    0.13 
   8  -6  -2    3.71    0.30 
  -8   6   2    4.29    0.31 
  -8   6   2    4.23    0.30 
   7  -6  -2    0.47    0.11 
  -7   6   2    0.41    0.11 
  -7   6   2    0.41    0.10 
  -7   6   2    0.37    0.10 
   6  -6  -2   17.52    0.76 
  -6   6   2   17.87    0.77 
  -6   6   2   18.17    0.75 
  -6   6   2   17.91    0.73 
   5  -6  -2  107.68    3.90 
  -5   6   2  105.34    3.91 
  -5   6   2  108.07    3.87 
  -5   6   2  111.49    3.89 
   4  -6  -2   30.97    1.18 
  -4   6   2   32.25    1.16 
  -4   6   2   30.10    1.18 
  -4   6   2   30.15    1.17 
   3  -6  -2    4.06    0.22 
   3  -6  -2    4.12    0.18 
  -3   6   2    3.92    0.20 
  -3   6   2    4.41    0.21 
  -3   6   2    4.07    0.22 
   2  -6  -2   10.24    0.44 
  -2   6   2   10.99    0.45 
  -2   6   2   10.41    0.43 
  -2   6   2   11.52    0.43 
   1  -6  -2    2.21    0.13 
  -1   6   2    2.07    0.11 
  -1   6   2    2.09    0.12 
  -1   6   2    2.35    0.14 
   0  -6  -2   10.75    0.41 
   0   6   2   11.07    0.37 
   0   6   2    9.34    0.37 
  -1  -6  -2   22.76    0.87 
  -2  -6  -2   14.80    0.57 
  -2  -6  -2   15.01    0.59 
   2   6   2   13.36    0.50 
   2   6   2   13.73    0.50 
  -3  -6  -2    0.81    0.11 
  -3  -6  -2    0.71    0.09 
   3   6   2    0.70    0.08 
   3   6   2    0.57    0.05 
   3   6   2    0.75    0.06 
  -4  -6  -2   13.55    0.60 
  -4  -6  -2   13.32    0.58 
   4   6   2   13.38    0.52 
   4   6   2   13.94    0.53 
   4   6   2   13.90    0.55 
  -5  -6  -2   11.44    0.53 
  -5  -6  -2   11.74    0.53 
   5   6   2   10.88    0.48 
   5   6   2   11.13    0.46 
  -6  -6  -2   16.54    0.73 
  -6  -6  -2   15.34    0.71 
   6   6   2   16.10    0.66 
   6   6   2   15.46    0.64 
  -7  -6  -2    2.68    0.26 
  -7  -6  -2    2.77    0.25 
   7   6   2    3.06    0.20 
   7   6   2    2.80    0.21 
  -8  -6  -2    0.06    0.12 
  -8  -6  -2    0.29    0.14 
   8   6   2    0.29    0.09 
   8   6   2    0.13    0.08 
  -9  -6  -2    1.55    0.25 
  -9  -6  -2    1.28    0.24 
   9   6   2    1.43    0.18 
   9   6   2    1.51    0.18 
 -10  -6  -2    1.90    0.31 
 -10  -6  -2    1.79    0.29 
  10   6   2    1.82    0.22 
  10   6   2    1.83    0.22 
 -11  -6  -2    7.15    0.55 
 -11  -6  -2    6.64    0.54 
  11   6   2    7.77    0.45 
  11   6   2    8.02    0.46 
   9  -7  -2    1.44    0.21 
  -9   7   2    1.22    0.21 
  -9   7   2    1.57    0.23 
   8  -7  -2    0.42    0.13 
  -8   7   2    0.18    0.11 
  -8   7   2    0.32    0.11 
   7  -7  -2   20.88    0.90 
  -7   7   2   21.32    0.89 
  -7   7   2   20.78    0.90 
   6  -7  -2   47.25    1.81 
  -6   7   2   50.41    1.81 
  -6   7   2   46.93    1.82 
  -6   7   2   46.39    1.78 
   5  -7  -2    1.25    0.16 
  -5   7   2    1.25    0.13 
  -5   7   2    1.61    0.15 
  -5   7   2    1.30    0.15 
   4  -7  -2    3.19    0.21 
  -4   7   2    3.29    0.19 
  -4   7   2    3.15    0.21 
  -4   7   2    3.53    0.20 
   3  -7  -2    0.55    0.09 
  -3   7   2    0.53    0.08 
  -3   7   2    0.55    0.08 
  -3   7   2    0.45    0.09 
   2  -7  -2    0.45    0.07 
  -2   7   2    0.38    0.06 
  -2   7   2    0.36    0.07 
  -2   7   2    0.41    0.06 
  -2   7   2    0.45    0.08 
   1  -7  -2    0.29    0.06 
  -1   7   2    0.31    0.06 
  -1   7   2    0.34    0.04 
   0  -7  -2  120.49    3.99 
   0   7   2  119.39    3.95 
   0   7   2   98.13    3.95 
  -1  -7  -2   34.80    1.31 
  -1  -7  -2   37.43    1.35 
  -2  -7  -2    6.71    0.33 
  -2  -7  -2    7.40    0.35 
  -3  -7  -2    0.23    0.07 
  -3  -7  -2    0.17    0.06 
   3   7   2    0.07    0.04 
   3   7   2    0.08    0.03 
   3   7   2    0.10    0.03 
  -4  -7  -2   36.24    1.39 
  -4  -7  -2   34.88    1.39 
   4   7   2   35.40    1.33 
   4   7   2   35.12    1.30 
   4   7   2   37.84    1.31 
  -5  -7  -2    7.94    0.41 
  -5  -7  -2    7.75    0.42 
   5   7   2    7.43    0.35 
   5   7   2    7.42    0.33 
  -6  -7  -2    4.97    0.34 
  -6  -7  -2    4.67    0.33 
   6   7   2    4.91    0.26 
   6   7   2    5.39    0.28 
  -7  -7  -2    2.88    0.28 
  -7  -7  -2    3.06    0.28 
   7   7   2    3.21    0.21 
   7   7   2    3.00    0.22 
  -8  -7  -2    2.21    0.27 
  -8  -7  -2    2.07    0.27 
   8   7   2    1.86    0.19 
   8   7   2    2.04    0.19 
  -9  -7  -2    3.24    0.34 
  -9  -7  -2    2.46    0.30 
   9   7   2    2.71    0.24 
   9   7   2    2.73    0.23 
 -10  -7  -2    3.88    0.39 
 -10  -7  -2    4.08    0.40 
  10   7   2    3.94    0.31 
  10   7   2    3.94    0.30 
 -11  -7  -2    2.74    0.41 
  11   7   2    3.00    0.29 
  11   7   2    2.92    0.29 
   9  -8  -2    1.25    0.21 
  -9   8   2    1.72    0.24 
   8  -8  -2    3.43    0.29 
  -8   8   2    3.99    0.31 
  -8   8   2    4.09    0.30 
   7  -8  -2    1.21    0.18 
  -7   8   2    0.88    0.15 
  -7   8   2    1.24    0.19 
   6  -8  -2    3.65    0.26 
  -6   8   2    3.20    0.24 
  -6   8   2    3.85    0.27 
   5  -8  -2    0.85    0.14 
  -5   8   2    0.78    0.13 
  -5   8   2    0.83    0.12 
  -5   8   2    0.89    0.13 
   4  -8  -2    0.92    0.13 
  -4   8   2    0.77    0.11 
  -4   8   2    0.88    0.12 
  -4   8   2    0.94    0.11 
   3  -8  -2   18.10    0.74 
  -3   8   2   18.79    0.76 
  -3   8   2   19.06    0.73 
  -3   8   2   18.45    0.74 
   2  -8  -2   91.08    3.18 
  -2   8   2   84.54    3.16 
  -2   8   2   88.34    3.20 
  -2   8   2   91.36    3.19 
   1  -8  -2   93.86    3.27 
  -1   8   2   89.75    3.24 
   0  -8  -2   90.62    3.15 
   0   8   2   79.23    3.11 
   0   8   2   95.78    3.11 
  -1  -8  -2   12.13    0.53 
  -1  -8  -2   12.33    0.49 
  -2  -8  -2   24.97    0.99 
  -2  -8  -2   25.10    0.99 
  -3  -8  -2    3.29    0.23 
  -3  -8  -2    3.36    0.22 
   3   8   2    3.08    0.14 
   3   8   2    3.07    0.14 
  -4  -8  -2    1.38    0.16 
  -4  -8  -2    1.17    0.15 
   4   8   2    1.38    0.09 
   4   8   2    1.20    0.12 
   4   8   2    1.60    0.10 
  -5  -8  -2   95.99    3.43 
  -5  -8  -2   92.54    3.44 
   5   8   2   89.43    3.33 
   5   8   2   95.40    3.36 
  -6  -8  -2    0.56    0.14 
  -6  -8  -2    0.62    0.15 
   6   8   2    0.72    0.10 
   6   8   2    0.58    0.10 
  -7  -8  -2    0.28    0.12 
  -7  -8  -2    0.26    0.14 
   7   8   2    0.27    0.08 
   7   8   2    0.60    0.11 
  -8  -8  -2   12.22    0.67 
  -8  -8  -2   11.94    0.67 
   8   8   2   13.32    0.59 
   8   8   2   12.73    0.58 
  -9  -8  -2    8.41    0.54 
  -9  -8  -2    6.79    0.50 
   9   8   2    7.73    0.42 
   9   8   2    7.82    0.43 
 -10  -8  -2    0.87    0.22 
 -10  -8  -2    1.00    0.25 
  10   8   2    0.75    0.15 
  10   8   2    0.80    0.15 
  -8   9   2    1.53    0.22 
  -8   9   2    1.66    0.23 
  -7   9   2    0.21    0.10 
  -7   9   2    0.21    0.10 
   6  -9  -2    4.89    0.32 
  -6   9   2    5.27    0.33 
  -6   9   2    4.97    0.31 
   5  -9  -2    8.48    0.41 
  -5   9   2    8.31    0.43 
  -5   9   2    7.58    0.41 
  -5   9   2    7.40    0.39 
   4  -9  -2   14.55    0.63 
  -4   9   2   15.04    0.65 
  -4   9   2   14.79    0.61 
  -4   9   2   14.28    0.62 
   3  -9  -2    6.31    0.32 
  -3   9   2    6.13    0.30 
  -3   9   2    6.52    0.32 
  -3   9   2    6.45    0.34 
   2  -9  -2   45.83    1.73 
  -2   9   2   46.32    1.76 
  -2   9   2   49.02    1.71 
   1  -9  -2    8.61    0.37 
  -1   9   2    8.65    0.34 
  -1   9   2    7.88    0.33 
   0  -9  -2   11.17    0.44 
   0   9   2    9.87    0.40 
   0   9   2   11.24    0.40 
  -1  -9  -2    4.31    0.26 
  -1  -9  -2    4.68    0.22 
  -2  -9  -2    5.79    0.33 
  -2  -9  -2    6.35    0.34 
   2   9   2    6.40    0.23 
   2   9   2    5.97    0.23 
  -3  -9  -2   17.36    0.72 
  -3  -9  -2   17.07    0.73 
   3   9   2   14.71    0.61 
   3   9   2   17.13    0.61 
  -4  -9  -2    6.71    0.38 
  -4  -9  -2    6.89    0.40 
   4   9   2    6.69    0.29 
   4   9   2    6.55    0.32 
  -5  -9  -2   18.86    0.83 
  -5  -9  -2   18.30    0.83 
   5   9   2   18.89    0.75 
   5   9   2   17.99    0.72 
  -6  -9  -2    0.08    0.10 
  -6  -9  -2    0.07    0.10 
   6   9   2    0.12    0.07 
   6   9   2    0.11    0.06 
  -7  -9  -2    2.83    0.29 
  -7  -9  -2    2.94    0.29 
   7   9   2    2.67    0.20 
   7   9   2    3.05    0.22 
  -8  -9  -2    6.10    0.45 
  -8  -9  -2    6.11    0.45 
   8   9   2    6.37    0.36 
   8   9   2    5.78    0.34 
  -9  -9  -2    4.17    0.40 
  -9  -9  -2    4.04    0.40 
   9   9   2    4.09    0.29 
   9   9   2    4.32    0.30 
 -10  -9  -2    0.07    0.18 
 -10  -9  -2   -0.06    0.17 
  10   9   2    0.14    0.10 
  10   9   2   -0.04    0.08 
  -8  10   2    5.44    0.38 
  -7  10   2    4.78    0.34 
  -7  10   2    4.07    0.31 
  -6  10   2    0.64    0.13 
  -6  10   2    0.59    0.13 
  -5  10   2    1.99    0.18 
  -5  10   2    1.63    0.18 
   4 -10  -2    4.93    0.39 
  -4  10   2    5.29    0.29 
  -4  10   2    5.55    0.32 
  -4  10   2    5.15    0.30 
   3 -10  -2   17.13    0.69 
  -3  10   2   16.09    0.67 
  -3  10   2   16.91    0.72 
   2 -10  -2    3.92    0.23 
  -2  10   2    4.55    0.22 
   1 -10  -2   38.97    1.44 
  -1  10   2   38.56    1.40 
   0 -10  -2    0.58    0.09 
   0  10   2    0.40    0.05 
   0  10   2    0.56    0.05 
  -1 -10  -2   10.77    0.44 
  -1 -10  -2   10.21    0.49 
   1  10   2   10.58    0.38 
   1  10   2   10.08    0.38 
  -2 -10  -2    1.12    0.10 
  -2 -10  -2    0.99    0.15 
  -2 -10  -2    1.06    0.15 
   2  10   2    1.17    0.06 
   2  10   2    1.02    0.06 
  -3 -10  -2   16.43    0.73 
  -3 -10  -2   16.31    0.72 
   3  10   2   15.55    0.59 
   3  10   2   15.84    0.59 
  -4 -10  -2    0.78    0.15 
  -4 -10  -2    0.66    0.13 
   4  10   2    0.75    0.08 
  -5 -10  -2    1.69    0.21 
  -5 -10  -2    1.85    0.23 
   5  10   2    1.47    0.15 
   5  10   2    1.93    0.13 
  -6 -10  -2    2.82    0.28 
  -6 -10  -2    2.71    0.28 
   6  10   2    2.54    0.18 
   6  10   2    3.03    0.21 
  -7 -10  -2    8.49    0.54 
  -7 -10  -2    8.47    0.53 
   7  10   2    8.65    0.42 
   7  10   2    9.19    0.44 
  -8 -10  -2    3.99    0.38 
  -8 -10  -2    3.97    0.38 
   8  10   2    4.62    0.29 
   8  10   2    4.62    0.30 
  -9 -10  -2    0.06    0.16 
  -9 -10  -2    0.35    0.17 
   9  10   2    0.40    0.12 
   9  10   2    0.32    0.11 
  -7  11   2    1.91    0.23 
  -6  11   2   -0.11    0.07 
  -6  11   2    0.03    0.08 
  -5  11   2    0.03    0.08 
  -5  11   2    0.01    0.07 
  -4  11   2    7.02    0.39 
  -4  11   2    6.47    0.34 
  -3  11   2   17.14    0.71 
  -3  11   2   18.11    0.77 
  -2  11   2    0.27    0.06 
  -1  11   2    3.61    0.18 
   0 -11  -2    1.60    0.13 
   0 -11  -2    1.58    0.17 
   0  11   2    1.31    0.09 
  -1 -11  -2    0.65    0.13 
  -1 -11  -2    0.71    0.09 
   1  11   2    0.73    0.06 
   1  11   2    0.72    0.05 
  -2 -11  -2    3.24    0.26 
  -2 -11  -2    3.01    0.25 
  -2 -11  -2    3.53    0.19 
   2  11   2    3.09    0.14 
   2  11   2    3.07    0.14 
  -3 -11  -2    7.01    0.42 
  -3 -11  -2    7.14    0.41 
   3  11   2    6.82    0.28 
  -4 -11  -2    0.53    0.14 
  -4 -11  -2    0.60    0.14 
   4  11   2    0.53    0.07 
  -5 -11  -2    2.44    0.26 
  -5 -11  -2    2.69    0.28 
   5  11   2    2.76    0.17 
  -6 -11  -2    4.66    0.37 
  -6 -11  -2    5.13    0.40 
   6  11   2    4.82    0.29 
   6  11   2    5.22    0.27 
  -7 -11  -2    0.43    0.15 
  -7 -11  -2    0.89    0.20 
   7  11   2    0.55    0.11 
   7  11   2    0.71    0.11 
  -8 -11  -2    3.12    0.37 
  -8 -11  -2    2.68    0.34 
   8  11   2    3.16    0.24 
   8  11   2    3.52    0.24 
  -9 -11  -2    0.09    0.17 
   9  11   2    0.01    0.08 
   9  11   2   -0.05    0.09 
  -6  12   2    0.21    0.10 
  -5  12   2    6.07    0.39 
  -5  12   2    6.90    0.37 
  -4  12   2    7.47    0.39 
  -4  12   2    8.29    0.45 
  -3  12   2    0.04    0.06 
  -2  12   2    1.72    0.14 
  -1  12   2    4.87    0.23 
   0 -12  -2   -0.02    0.07 
   0  12   2   -0.02    0.03 
  -1 -12  -2    2.83    0.25 
   1  12   2    2.69    0.13 
  -2 -12  -2   11.89    0.59 
  -2 -12  -2   11.59    0.59 
   2  12   2   11.30    0.43 
  -3 -12  -2    0.35    0.11 
  -3 -12  -2    0.40    0.08 
  -3 -12  -2    0.27    0.11 
   3  12   2    0.45    0.06 
  -4 -12  -2    0.54    0.14 
  -4 -12  -2    0.47    0.14 
   4  12   2    0.56    0.07 
  -5 -12  -2    5.43    0.40 
  -5 -12  -2    5.23    0.39 
   5  12   2    5.76    0.27 
  -6 -12  -2    2.70    0.30 
  -6 -12  -2    3.63    0.35 
   6  12   2    3.14    0.20 
  -7 -12  -2    0.78    0.21 
  -7 -12  -2    1.04    0.24 
   7  12   2    0.87    0.13 
   7  12   2    0.67    0.13 
  -8 -12  -2   -0.03    0.16 
  -8 -12  -2    0.11    0.16 
   8  12   2    0.01    0.07 
   8  12   2   -0.04    0.08 
  -4  13   2    0.73    0.12 
  -3  13   2    3.28    0.22 
  -2  13   2    0.42    0.08 
   1 -13  -2    2.90    0.26 
  -1  13   2    2.71    0.16 
   0 -13  -2    6.66    0.42 
   0  13   2    7.14    0.29 
  -1 -13  -2    2.94    0.27 
   1  13   2    3.15    0.15 
  -2 -13  -2    2.28    0.24 
  -2 -13  -2    2.38    0.25 
   2  13   2    2.19    0.11 
  -3 -13  -2   -0.03    0.09 
  -3 -13  -2   -0.05    0.09 
   3  13   2    0.00    0.03 
  -4 -13  -2    1.42    0.23 
  -4 -13  -2    1.65    0.24 
   4  13   2    1.54    0.11 
  -5 -13  -2    1.18    0.22 
  -5 -13  -2    1.27    0.23 
   5  13   2    1.33    0.12 
  -6 -13  -2    1.65    0.27 
  -6 -13  -2    1.99    0.28 
   6  13   2    2.06    0.16 
  -7 -13  -2    0.21    0.28 
  -7 -13  -2    1.06    0.25 
   7  13   2    0.86    0.13 
  -3  14   2    0.06    0.07 
  -2  14   2    1.80    0.15 
   1 -14  -2    3.14    0.29 
  -1  14   2    3.30    0.19 
   0 -14  -2    3.45    0.31 
   0  14   2    3.91    0.19 
  -1 -14  -2    1.38    0.21 
  -1 -14  -2    1.31    0.20 
   1  14   2    1.08    0.09 
  -2 -14  -2    1.16    0.20 
  -2 -14  -2    1.07    0.20 
   2  14   2    1.09    0.08 
  -3 -14  -2   -0.07    0.08 
  -3 -14  -2    0.02    0.09 
   3  14   2    0.03    0.03 
  -4 -14  -2    0.38    0.15 
  -4 -14  -2    0.32    0.15 
   4  14   2    0.35    0.06 
  -5 -14  -2    0.60    0.19 
  -5 -14  -2    0.66    0.18 
   5  14   2    1.05    0.11 
  -1 -15  -2   -0.15    0.08 
   1  15   2    0.02    0.04 
  -2 -15  -2    0.86    0.19 
   2  15   2    0.82    0.07 
   3  12  -3    2.14    0.18 
  -3 -12   3    1.96    0.28 
   2  12  -3    2.97    0.20 
   1  12  -3    0.92    0.12 
   0  12  -3   -0.03    0.05 
  -1  12  -3    0.96    0.13 
  -2  12  -3    0.03    0.07 
  -3  12  -3    1.48    0.18 
   5  11  -3    0.86    0.15 
  -5 -11   3    0.93    0.21 
   4  11  -3    0.76    0.12 
  -4 -11   3    0.67    0.18 
   3  11  -3    1.23    0.14 
  -3 -11   3    1.12    0.22 
  -3 -11   3    1.18    0.23 
   2  11  -3    0.44    0.08 
  -2 -11   3    0.42    0.14 
   1  11  -3    0.06    0.06 
  -1 -11   3    0.10    0.10 
   0  11  -3    0.02    0.05 
   0 -11   3    0.10    0.11 
  -1  11  -3    1.13    0.13 
   1 -11   3    0.94    0.18 
  -2  11  -3    1.86    0.17 
   2 -11   3    1.54    0.21 
  -3  11  -3    0.21    0.08 
  -4  11  -3    0.99    0.19 
  -4  11  -3    0.50    0.11 
  -5  11  -3    1.25    0.23 
  -5  11  -3    1.37    0.20 
   6  10  -3    0.19    0.09 
  -6 -10   3    0.20    0.14 
   5  10  -3    5.42    0.30 
  -5 -10   3    4.61    0.40 
  -5 -10   3    5.01    0.41 
   4  10  -3    0.05    0.06 
  -4 -10   3   -0.06    0.09 
  -4 -10   3    0.10    0.11 
   3  10  -3    2.26    0.17 
  -3 -10   3    2.46    0.28 
  -3 -10   3    2.23    0.26 
   2  10  -3    6.23    0.30 
  -2 -10   3    5.47    0.41 
   1  10  -3    0.89    0.11 
  -1 -10   3    0.94    0.18 
   0  10  -3    4.96    0.25 
   0 -10   3    4.96    0.35 
  -1  10  -3   11.53    0.49 
   1 -10   3   11.53    0.60 
  -2  10  -3    3.12    0.21 
   2 -10   3    3.25    0.28 
  -3  10  -3    0.01    0.10 
  -3  10  -3    0.03    0.06 
  -4  10  -3    0.65    0.12 
  -4  10  -3    0.70    0.15 
  -5  10  -3    0.83    0.17 
  -5  10  -3    0.79    0.14 
  -6  10  -3    1.79    0.22 
  -6  10  -3    1.97    0.25 
   7   9  -3    0.25    0.10 
  -7  -9   3   -0.02    0.13 
   6   9  -3    0.14    0.08 
  -6  -9   3   -0.04    0.13 
  -6  -9   3    0.03    0.13 
   5   9  -3    0.91    0.14 
  -5  -9   3    1.16    0.21 
  -5  -9   3    1.01    0.20 
   4   9  -3   22.16    0.88 
  -4  -9   3   22.40    1.02 
  -4  -9   3   22.02    1.01 
   3   9  -3    3.65    0.22 
  -3  -9   3    4.41    0.34 
   2   9  -3    0.00    0.04 
  -2  -9   3    0.09    0.10 
   1   9  -3    3.49    0.20 
  -1  -9   3    3.63    0.29 
   0   9  -3   24.94    0.94 
   0  -9   3   24.46    1.06 
  -1   9  -3    7.05    0.33 
   1  -9   3    7.20    0.42 
  -2   9  -3    4.80    0.33 
  -2   9  -3    5.22    0.27 
  -3   9  -3   19.81    0.79 
  -3   9  -3   19.50    0.86 
  -4   9  -3    3.54    0.27 
  -4   9  -3    3.41    0.23 
  -5   9  -3    3.66    0.29 
  -5   9  -3    3.58    0.29 
  -5   9  -3    3.56    0.25 
  -6   9  -3    8.62    0.49 
  -6   9  -3    9.86    0.48 
  -6   9  -3    8.18    0.48 
  -7   9  -3    1.92    0.24 
  -7   9  -3    1.39    0.22 
   8   8  -3    1.36    0.19 
   8   8  -3    1.31    0.19 
  -8  -8   3    1.67    0.27 
   7   8  -3    0.46    0.11 
   7   8  -3    0.42    0.11 
  -7  -8   3    0.51    0.19 
  -7  -8   3    0.43    0.16 
   6   8  -3    3.22    0.23 
  -6  -8   3    2.89    0.31 
  -6  -8   3    3.15    0.32 
   5   8  -3   10.75    0.48 
  -5  -8   3    9.86    0.58 
  -5  -8   3   10.26    0.59 
   4   8  -3    6.83    0.34 
  -4  -8   3    7.01    0.44 
  -4  -8   3    6.98    0.43 
   3   8  -3    4.93    0.25 
  -3  -8   3    4.57    0.34 
   2   8  -3    0.83    0.10 
  -2  -8   3    0.90    0.16 
   1   8  -3   15.93    0.64 
  -1  -8   3   16.30    0.75 
   0   8  -3   13.76    0.55 
   0  -8   3   13.34    0.64 
  -1   8  -3   27.58    1.07 
   1  -8   3   29.94    1.18 
  -2   8  -3    6.08    0.35 
  -2   8  -3    5.53    0.28 
  -3   8  -3    0.68    0.13 
  -3   8  -3    0.71    0.11 
  -4   8  -3    4.39    0.30 
  -4   8  -3    5.01    0.33 
  -4   8  -3    4.98    0.28 
  -5   8  -3    1.61    0.17 
  -5   8  -3    1.61    0.19 
  -5   8  -3    1.82    0.21 
  -6   8  -3    0.10    0.08 
  -6   8  -3    0.20    0.12 
  -6   8  -3   -0.01    0.07 
  -7   8  -3    0.02    0.09 
  -7   8  -3    0.06    0.09 
  -7   8  -3    0.09    0.11 
  -8   8  -3    0.12    0.11 
  -8   8  -3    0.18    0.11 
   9   7  -3    0.36    0.13 
   9   7  -3    0.42    0.14 
  -9  -7   3    0.29    0.18 
   8   7  -3    1.15    0.18 
   8   7  -3    0.89    0.16 
  -8  -7   3    0.86    0.21 
  -8  -7   3    0.89    0.23 
   7   7  -3    0.28    0.10 
   7   7  -3    0.36    0.10 
  -7  -7   3    0.67    0.18 
  -7  -7   3    0.56    0.19 
   6   7  -3    4.09    0.27 
   6   7  -3    4.60    0.28 
  -6  -7   3    4.00    0.37 
  -6  -7   3    4.90    0.37 
   5   7  -3    4.43    0.25 
   5   7  -3    3.80    0.28 
  -5  -7   3    3.86    0.31 
  -5  -7   3    4.14    0.34 
   4   7  -3    0.31    0.07 
   4   7  -3    0.28    0.07 
  -4  -7   3    0.36    0.12 
  -4  -7   3    0.18    0.11 
   3   7  -3    0.29    0.07 
   3   7  -3    0.25    0.06 
  -3  -7   3    0.15    0.09 
   2   7  -3   29.47    1.09 
  -2  -7   3   28.71    1.19 
   1   7  -3   51.54    1.85 
  -1  -7   3   49.97    1.94 
   0   7  -3    2.34    0.15 
   0  -7   3    2.44    0.21 
  -1   7  -3    8.94    0.44 
  -1   7  -3    8.89    0.38 
  -2   7  -3    3.07    0.23 
  -2   7  -3    3.32    0.18 
  -3   7  -3    2.04    0.15 
  -3   7  -3    2.18    0.20 
  -4   7  -3    0.42    0.08 
  -4   7  -3    0.54    0.12 
  -4   7  -3    0.61    0.12 
  -5   7  -3   11.89    0.53 
  -5   7  -3   11.24    0.55 
  -5   7  -3   11.75    0.55 
  -6   7  -3    6.84    0.41 
  -6   7  -3    7.81    0.39 
  -6   7  -3    7.21    0.41 
  -7   7  -3    0.19    0.09 
  -7   7  -3    0.16    0.10 
  -7   7  -3    0.30    0.12 
  -8   7  -3    0.17    0.10 
  -8   7  -3    0.05    0.10 
  -8   7  -3   -0.04    0.08 
  -9   7  -3    9.08    0.53 
  -9   7  -3    9.99    0.55 
   9   6  -3    0.76    0.15 
   9   6  -3    0.61    0.14 
  -9  -6   3    0.51    0.20 
   8   6  -3    0.26    0.10 
   8   6  -3    0.15    0.10 
  -8  -6   3    0.09    0.12 
  -8  -6   3   -0.01    0.14 
   7   6  -3    4.65    0.31 
   7   6  -3    4.96    0.30 
  -7  -6   3    4.84    0.40 
  -7  -6   3    4.79    0.37 
   6   6  -3   12.50    0.57 
   6   6  -3   13.16    0.56 
  -6  -6   3   12.39    0.66 
  -6  -6   3   12.59    0.65 
   5   6  -3    3.70    0.23 
   5   6  -3    3.67    0.23 
  -5  -6   3    4.27    0.31 
  -5  -6   3    3.27    0.28 
   4   6  -3    4.72    0.24 
   4   6  -3    3.86    0.23 
  -4  -6   3    4.13    0.30 
  -4  -6   3    4.22    0.31 
   3   6  -3   23.52    0.85 
   3   6  -3   21.36    0.85 
  -3  -6   3   21.61    0.94 
   2   6  -3   25.65    0.93 
   2   6  -3   25.11    0.95 
  -2  -6   3   24.64    1.03 
   1   6  -3    0.20    0.03 
   1   6  -3    0.21    0.05 
  -1  -6   3    0.18    0.07 
   0   6  -3    9.31    0.39 
   0  -6   3    9.79    0.46 
  -1   6  -3    0.23    0.08 
  -1   6  -3    0.10    0.04 
  -2   6  -3   12.44    0.51 
  -2   6  -3   12.87    0.56 
  -3   6  -3   46.94    1.76 
  -3   6  -3   46.52    1.75 
  -3   6  -3   46.83    1.72 
  -4   6  -3   31.84    1.22 
  -4   6  -3   33.42    1.22 
  -4   6  -3   28.03    1.18 
  -5   6  -3    8.27    0.40 
  -5   6  -3    8.26    0.42 
  -5   6  -3    8.09    0.42 
  -6   6  -3    0.38    0.09 
  -6   6  -3    0.25    0.10 
  -6   6  -3    0.32    0.10 
  -7   6  -3   12.04    0.59 
  -7   6  -3   12.06    0.59 
  -7   6  -3   11.78    0.57 
  -8   6  -3    3.11    0.28 
  -8   6  -3    2.68    0.26 
  -8   6  -3    3.05    0.27 
  -9   6  -3    3.97    0.32 
  -9   6  -3    3.90    0.32 
  -9   6  -3    3.95    0.31 
  10   5  -3    2.26    0.26 
  10   5  -3    2.18    0.25 
 -10  -5   3    1.82    0.32 
   9   5  -3   -0.01    0.08 
   9   5  -3    0.02    0.09 
  -9  -5   3   -0.12    0.15 
  -9  -5   3    0.02    0.13 
   8   5  -3    8.48    0.45 
   8   5  -3    8.13    0.46 
  -8  -5   3    8.21    0.54 
  -8  -5   3    8.75    0.53 
   7   5  -3   19.09    0.81 
   7   5  -3   19.30    0.83 
  -7  -5   3   20.20    0.91 
  -7  -5   3   18.77    0.92 
   6   5  -3   14.14    0.61 
   6   5  -3   13.84    0.62 
  -6  -5   3   14.06    0.68 
  -6  -5   3   14.17    0.71 
   5   5  -3    6.57    0.33 
   5   5  -3    6.87    0.34 
  -5  -5   3    6.47    0.39 
  -5  -5   3    6.43    0.41 
   4   5  -3    0.04    0.05 
  -4  -5   3    0.05    0.09 
  -4  -5   3    0.04    0.07 
   3   5  -3    2.94    0.18 
   3   5  -3    3.26    0.18 
  -3  -5   3    2.87    0.23 
   2   5  -3    7.44    0.33 
   2   5  -3    8.01    0.32 
  -2  -5   3    7.83    0.40 
   1   5  -3   19.09    0.72 
   1   5  -3   18.47    0.69 
  -1  -5   3   19.24    0.78 
   0   5  -3    6.47    0.28 
   0  -5   3    6.67    0.34 
  -1   5  -3    5.09    0.28 
  -1   5  -3    5.26    0.24 
  -2   5  -3   82.01    2.91 
  -2   5  -3   81.09    2.96 
  -3   5  -3  127.42    4.53 
  -3   5  -3  122.99    4.48 
  -3   5  -3  128.49    4.52 
  -4   5  -3    7.00    0.34 
  -4   5  -3    7.30    0.36 
  -4   5  -3    7.08    0.36 
  -5   5  -3    0.07    0.06 
  -5   5  -3    0.02    0.05 
  -5   5  -3   -0.07    0.06 
  -6   5  -3   -0.02    0.07 
  -6   5  -3   -0.02    0.07 
  -6   5  -3   -0.07    0.05 
  -7   5  -3    0.26    0.11 
  -7   5  -3    0.24    0.09 
  -7   5  -3    0.26    0.10 
  -8   5  -3    5.92    0.36 
  -8   5  -3    5.43    0.35 
  -8   5  -3    5.38    0.36 
  -9   5  -3   17.47    0.79 
  -9   5  -3   16.50    0.79 
  -9   5  -3   17.49    0.80 
 -10   5  -3    5.39    0.39 
  10   4  -3    0.24    0.14 
  10   4  -3    0.14    0.11 
 -10  -4   3    0.39    0.19 
   9   4  -3    3.71    0.28 
   9   4  -3    3.66    0.29 
  -9  -4   3    3.25    0.39 
  -9  -4   3    4.05    0.35 
   8   4  -3   18.25    0.80 
   8   4  -3   17.57    0.78 
  -8  -4   3   17.66    0.85 
  -8  -4   3   18.34    0.90 
   7   4  -3   28.32    1.12 
   7   4  -3   27.94    1.14 
  -7  -4   3   28.26    1.19 
  -7  -4   3   28.08    1.22 
   6   4  -3   16.50    0.68 
   6   4  -3   16.53    0.70 
  -6  -4   3   15.31    0.65 
  -6  -4   3   15.77    0.74 
  -6  -4   3   16.80    0.78 
   5   4  -3   53.71    1.95 
   5   4  -3   51.86    1.96 
  -5  -4   3   53.34    2.01 
  -5  -4   3   51.59    1.91 
  -5  -4   3   53.34    2.03 
   4   4  -3    1.83    0.14 
   4   4  -3    1.77    0.13 
  -4  -4   3    1.70    0.12 
  -4  -4   3    1.85    0.19 
  -4  -4   3    1.52    0.16 
   3   4  -3   38.81    1.41 
   3   4  -3   36.42    1.41 
  -3  -4   3   37.92    1.47 
  -3  -4   3   40.82    1.39 
  -3  -4   3   37.43    1.46 
   2   4  -3   21.17    0.80 
   2   4  -3   21.33    0.80 
  -2  -4   3   21.16    0.86 
   1   4  -3   26.74    1.00 
   1   4  -3   28.21    0.98 
  -1  -4   3   26.35    1.05 
   0   4  -3   10.28    0.40 
   0   4  -3    9.61    0.43 
   0  -4   3   10.13    0.44 
  -1   4  -3   69.18    2.54 
  -1   4  -3   73.18    2.58 
  -2   4  -3   57.16    2.14 
  -2   4  -3   59.89    2.11 
  -2   4  -3   59.28    2.15 
  -3   4  -3   40.38    1.52 
  -3   4  -3   40.99    1.53 
  -3   4  -3   42.35    1.50 
   3  -4   3   39.75    1.45 
  -4   4  -3   23.02    0.94 
  -4   4  -3   23.99    0.92 
  -4   4  -3   24.08    0.95 
   4  -4   3   24.84    0.89 
  -5   4  -3    3.36    0.14 
  -5   4  -3    3.21    0.23 
  -5   4  -3    3.32    0.22 
  -5   4  -3    3.45    0.21 
   5  -4   3    3.29    0.18 
  -6   4  -3    2.37    0.19 
  -6   4  -3    2.66    0.19 
  -6   4  -3    2.43    0.11 
  -6   4  -3    2.23    0.20 
   6  -4   3    2.22    0.16 
  -7   4  -3   16.94    0.75 
  -7   4  -3   17.07    0.74 
  -7   4  -3   17.23    0.73 
  -7   4  -3   16.82    0.62 
   7  -4   3   16.18    0.69 
  -8   4  -3   54.75    1.98 
  -8   4  -3   50.83    1.98 
  -8   4  -3   50.23    1.98 
  -8   4  -3   51.35    1.85 
  -9   4  -3    1.72    0.23 
  -9   4  -3    1.48    0.11 
  -9   4  -3    1.46    0.21 
  -9   4  -3    1.38    0.20 
 -10   4  -3    0.26    0.12 
 -10   4  -3    0.17    0.05 
 -10   4  -3    0.19    0.12 
  10   3  -3   10.73    0.59 
 -10  -3   3   10.73    0.64 
 -10  -3   3   11.00    0.53 
   9   3  -3    7.16    0.44 
   9   3  -3    7.14    0.42 
  -9  -3   3    7.58    0.49 
  -9  -3   3    6.94    0.53 
  -9  -3   3    8.07    0.40 
   8   3  -3   12.94    0.65 
   8   3  -3   14.69    0.64 
  -8  -3   3   13.42    0.73 
  -8  -3   3   14.29    0.61 
  -8  -3   3   14.06    0.70 
   7   3  -3   35.20    1.35 
   7   3  -3   32.95    1.36 
  -7  -3   3   35.31    1.31 
  -7  -3   3   34.17    1.43 
  -7  -3   3   35.11    1.41 
   6   3  -3    0.76    0.13 
   6   3  -3    0.98    0.13 
  -6  -3   3    0.80    0.15 
  -6  -3   3    0.84    0.12 
  -6  -3   3    0.85    0.17 
   5   3  -3    3.60    0.23 
   5   3  -3    3.95    0.23 
  -5  -3   3    3.88    0.29 
  -5  -3   3    3.70    0.20 
  -5  -3   3    3.56    0.26 
   4   3  -3    9.00    0.40 
   4   3  -3    8.86    0.41 
  -4  -3   3    9.19    0.44 
  -4  -3   3    9.24    0.46 
  -4  -3   3    9.16    0.37 
   3   3  -3   54.41    2.02 
  -3  -3   3   57.84    2.07 
  -3  -3   3   56.15    2.08 
  -3  -3   3   55.73    2.00 
   2   3  -3    0.73    0.08 
   2   3  -3    0.83    0.08 
  -2  -3   3    0.91    0.11 
   1   3  -3   45.96    1.67 
   1   3  -3   47.58    1.68 
  -1  -3   3   46.62    1.72 
   0   3  -3    7.23    0.27 
   0   3  -3    7.09    0.30 
   0  -3   3    7.68    0.34 
  -1   3  -3   28.86    1.08 
  -1   3  -3   30.25    1.11 
  -2   3  -3   16.87    0.68 
  -2   3  -3   17.32    0.65 
  -2   3  -3   17.12    0.67 
  -3   3  -3   84.26    2.96 
  -3   3  -3   84.17    3.02 
  -3   3  -3   83.18    3.03 
  -3   3  -3   85.31    3.00 
   3  -3   3   83.87    2.97 
  -4   3  -3   22.51    0.87 
  -4   3  -3   22.66    0.80 
  -4   3  -3   21.93    0.88 
  -4   3  -3   22.52    0.86 
   4  -3   3   21.63    0.82 
  -5   3  -3   39.96    1.42 
  -5   3  -3   39.79    1.51 
  -5   3  -3   38.16    1.49 
  -5   3  -3   40.03    1.48 
   5  -3   3   40.55    1.46 
  -6   3  -3   47.00    1.77 
  -6   3  -3   46.73    1.68 
  -6   3  -3   45.21    1.75 
  -6   3  -3   46.17    1.76 
   6  -3   3   48.89    1.73 
  -7   3  -3    2.48    0.20 
  -7   3  -3    2.51    0.21 
  -7   3  -3    2.11    0.14 
  -7   3  -3    2.30    0.21 
   7  -3   3    2.21    0.17 
  -8   3  -3    0.02    0.10 
  -8   3  -3    0.05    0.05 
  -8   3  -3    0.04    0.07 
  -8   3  -3    0.17    0.09 
   8  -3   3    0.08    0.07 
  -9   3  -3    0.30    0.13 
  -9   3  -3    0.35    0.12 
  -9   3  -3    0.31    0.07 
   9  -3   3    0.24    0.09 
 -10   3  -3    0.61    0.15 
 -10   3  -3    0.58    0.09 
 -10   3  -3    0.82    0.18 
  10  -3   3    0.48    0.12 
 -11   3  -3    0.11    0.07 
 -11   3  -3    0.10    0.13 
  10   2  -3    2.13    0.26 
 -10  -2   3    2.21    0.22 
 -10  -2   3    1.52    0.30 
 -10  -2   3    1.86    0.30 
   9   2  -3   24.27    1.22 
   9   2  -3   24.67    1.05 
  -9  -2   3   23.58    1.12 
  -9  -2   3   24.34    0.97 
  -9  -2   3   23.49    1.07 
   8   2  -3    4.27    0.30 
   8   2  -3    3.65    0.27 
  -8  -2   3    3.72    0.24 
  -8  -2   3    3.28    0.35 
  -8  -2   3    3.58    0.30 
   7   2  -3    2.33    0.21 
   7   2  -3    2.33    0.20 
  -7  -2   3    2.30    0.18 
  -7  -2   3    2.56    0.27 
  -7  -2   3    2.55    0.24 
   6   2  -3    1.33    0.16 
   6   2  -3    1.15    0.13 
  -6  -2   3    1.16    0.16 
  -6  -2   3    1.24    0.13 
  -6  -2   3    1.62    0.22 
   5   2  -3   31.37    1.20 
   5   2  -3   30.28    1.18 
  -5  -2   3   30.23    1.22 
  -5  -2   3   31.03    1.25 
  -5  -2   3   32.82    1.16 
   4   2  -3    0.89    0.11 
   4   2  -3    0.89    0.10 
  -4  -2   3    0.96    0.12 
  -4  -2   3    0.85    0.13 
  -4  -2   3    0.75    0.08 
   3   2  -3   13.18    0.53 
   3   2  -3   13.04    0.54 
  -3  -2   3   13.47    0.58 
  -3  -2   3   12.92    0.55 
  -3  -2   3   13.86    0.51 
   2   2  -3   30.50    1.13 
   2   2  -3   30.72    1.13 
  -2  -2   3   30.23    1.17 
  -2  -2   3   31.82    1.11 
   1   2  -3    0.07    0.03 
   1   2  -3    0.06    0.03 
  -1  -2   3    0.11    0.04 
   0   2  -3    6.42    0.23 
   0   2  -3    5.85    0.25 
   0  -2   3    5.94    0.27 
  -1   2  -3    5.70    0.22 
  -1   2  -3    5.66    0.26 
  -1   2  -3    6.28    0.25 
  -2   2  -3   49.54    1.81 
  -2   2  -3   51.17    1.84 
  -2   2  -3   50.81    1.79 
  -2   2  -3   48.37    1.82 
   2  -2   3   52.69    1.78 
  -3   2  -3    0.26    0.05 
  -3   2  -3    0.13    0.05 
  -3   2  -3    0.22    0.03 
  -3   2  -3    0.20    0.04 
   3  -2   3    0.27    0.04 
  -4   2  -3    8.32    0.32 
  -4   2  -3    8.19    0.38 
  -4   2  -3    7.90    0.36 
  -4   2  -3    8.33    0.37 
   4  -2   3    8.32    0.36 
   4  -2   3    8.00    0.33 
  -5   2  -3   10.06    0.43 
  -5   2  -3    9.45    0.44 
  -5   2  -3    9.97    0.39 
   5  -2   3   10.00    0.44 
   5  -2   3   10.18    0.42 
  -6   2  -3    3.25    0.17 
  -6   2  -3    3.69    0.25 
  -6   2  -3    3.58    0.23 
  -6   2  -3    3.55    0.22 
   6  -2   3    3.54    0.21 
  -7   2  -3    8.45    0.45 
  -7   2  -3    8.85    0.44 
  -7   2  -3    8.65    0.43 
  -7   2  -3    8.68    0.37 
   7  -2   3    8.58    0.40 
  -8   2  -3   -0.01    0.10 
  -8   2  -3    0.05    0.07 
  -8   2  -3    0.08    0.09 
  -8   2  -3    0.08    0.06 
   8  -2   3    0.07    0.07 
  -9   2  -3    3.19    0.20 
  -9   2  -3    3.33    0.30 
  -9   2  -3    3.55    0.28 
   9  -2   3    3.19    0.24 
 -10   2  -3    3.75    0.32 
 -10   2  -3    3.30    0.21 
 -10   2  -3    2.93    0.31 
  10  -2   3    3.25    0.26 
 -11   2  -3    5.81    0.43 
 -11   2  -3    6.01    0.31 
  11  -2   3    5.95    0.38 
  10   1  -3    0.25    0.14 
 -10  -1   3    0.05    0.18 
 -10  -1   3    0.20    0.10 
 -10  -1   3    0.24    0.17 
   9   1  -3    3.24    0.28 
  -9  -1   3    3.32    0.24 
  -9  -1   3    3.20    0.31 
  -9  -1   3    3.03    0.35 
   8   1  -3    0.47    0.11 
   8   1  -3    0.55    0.13 
  -8  -1   3    0.19    0.09 
  -8  -1   3    0.32    0.12 
  -8  -1   3    0.24    0.15 
   7   1  -3   15.72    0.72 
   7   1  -3   16.61    0.71 
  -7  -1   3   16.72    0.68 
  -7  -1   3   17.34    0.75 
  -7  -1   3   16.43    0.79 
   6   1  -3    2.19    0.19 
   6   1  -3    2.19    0.18 
  -6  -1   3    2.24    0.20 
  -6  -1   3    2.71    0.18 
  -6  -1   3    2.68    0.25 
   5   1  -3   67.47    2.55 
   5   1  -3   68.59    2.57 
  -5  -1   3   68.86    2.53 
  -5  -1   3   70.04    2.58 
  -5  -1   3   73.95    2.62 
  -5  -1   3   74.86    2.56 
  -5  -1   3   68.75    2.54 
   4   1  -3   32.97    1.26 
   4   1  -3   35.22    1.28 
  -4  -1   3   31.53    1.30 
  -4  -1   3   33.13    1.28 
  -4  -1   3   33.54    1.25 
  -4  -1   3   36.36    1.24 
   3   1  -3   65.04    2.38 
   3   1  -3   65.40    2.39 
  -3  -1   3   63.17    2.39 
  -3  -1   3   62.73    2.37 
  -3  -1   3   71.38    2.43 
  -3  -1   3   69.63    2.36 
   2   1  -3   63.15    2.38 
   2   1  -3   66.13    2.38 
  -2  -1   3   68.94    2.41 
  -2  -1   3   68.40    2.37 
   1   1  -3   50.12    1.84 
   1   1  -3   50.87    1.83 
  -1  -1   3   53.39    1.86 
   0   1  -3  445.00   14.45 
   0   1  -3  422.44   14.44 
   0   1  -3  392.13   14.50 
   0  -1   3  381.80   14.52 
  -1   1  -3    4.66    0.18 
  -1   1  -3    4.37    0.16 
  -1   1  -3    4.18    0.19 
  -1   1  -3    4.25    0.20 
  -2   1  -3    0.42    0.05 
  -2   1  -3    0.40    0.05 
  -2   1  -3    0.39    0.06 
  -2   1  -3    0.39    0.04 
   2  -1   3    0.39    0.06 
   2  -1   3    0.35    0.03 
  -3   1  -3    0.40    0.05 
  -3   1  -3    0.42    0.06 
  -3   1  -3    0.48    0.08 
  -3   1  -3    0.45    0.06 
   3  -1   3    0.35    0.06 
   3  -1   3    0.44    0.05 
  -4   1  -3    0.94    0.07 
  -4   1  -3    0.96    0.12 
  -4   1  -3    1.01    0.09 
  -4   1  -3    1.04    0.10 
   4  -1   3    0.84    0.09 
   4  -1   3    0.96    0.08 
  -5   1  -3   34.15    1.28 
  -5   1  -3   33.94    1.25 
  -5   1  -3   34.39    1.31 
  -5   1  -3   34.09    1.30 
   5  -1   3   35.42    1.29 
   5  -1   3   34.08    1.27 
  -6   1  -3  108.56    3.89 
  -6   1  -3  109.96    3.93 
  -6   1  -3  109.96    3.85 
  -6   1  -3  108.26    3.91 
   6  -1   3  111.95    3.88 
   6  -1   3  102.32    3.89 
  -7   1  -3   20.71    0.81 
  -7   1  -3   19.47    0.84 
  -7   1  -3   18.80    0.75 
  -7   1  -3   19.73    0.82 
   7  -1   3   19.27    0.79 
  -8   1  -3    8.16    0.44 
  -8   1  -3    8.27    0.37 
  -8   1  -3    8.10    0.45 
   8  -1   3    8.24    0.41 
  -9   1  -3    6.78    0.33 
  -9   1  -3    6.10    0.41 
  -9   1  -3    7.25    0.42 
   9  -1   3    6.59    0.37 
 -10   1  -3    5.25    0.39 
 -10   1  -3    5.89    0.39 
 -10   1  -3    6.00    0.31 
  10  -1   3    6.04    0.36 
 -11   1  -3    5.23    0.42 
 -11   1  -3    5.62    0.40 
 -11   1  -3    6.40    0.32 
  11  -1   3    5.37    0.37 
  11   0  -3    0.29    0.14 
 -11   0   3   -0.01    0.10 
  10   0  -3    0.23    0.12 
 -10   0   3    0.08    0.09 
 -10   0   3    0.04    0.16 
 -10   0   3    0.08    0.16 
   9   0  -3    0.00    0.08 
  -9   0   3   -0.05    0.13 
  -9   0   3    0.09    0.08 
  -9   0   3   -0.13    0.11 
   8   0  -3    0.09    0.08 
  -8   0   3    0.01    0.07 
  -8   0   3    0.06    0.11 
  -8   0   3   -0.03    0.11 
   7   0  -3    1.33    0.17 
   7   0  -3    1.17    0.15 
  -7   0   3    1.05    0.20 
  -7   0   3    1.22    0.14 
  -7   0   3    1.59    0.19 
   6   0  -3   84.40    3.12 
   6   0  -3   84.32    3.14 
  -6   0   3   85.58    3.14 
  -6   0   3   87.72    3.19 
  -6   0   3   87.86    3.09 
   5   0  -3   53.08    1.92 
   5   0  -3   53.32    1.94 
  -5   0   3   46.42    1.93 
  -5   0   3   54.76    1.99 
  -5   0   3   54.26    1.92 
  -5   0   3   50.29    1.91 
  -5   0   3   54.06    1.90 
   4   0  -3   45.92    1.73 
   4   0  -3   44.88    1.74 
  -4   0   3   48.01    1.71 
  -4   0   3   46.40    1.73 
  -4   0   3   48.90    1.78 
  -4   0   3   49.37    1.73 
   3   0  -3   47.96    1.66 
   3   0  -3   46.95    1.65 
  -3   0   3   46.03    1.69 
  -3   0   3   40.87    1.65 
  -3   0   3   43.99    1.63 
  -3   0   3   46.63    1.65 
   2   0  -3    7.25    0.31 
   2   0  -3    7.77    0.31 
  -2   0   3    7.62    0.33 
  -2   0   3    7.11    0.30 
  -2   0   3    7.10    0.29 
  -2   0   3    7.49    0.31 
   1   0  -3    9.20    0.34 
   1   0  -3    9.31    0.36 
  -1   0   3    8.42    0.35 
  -1   0   3    8.90    0.34 
  -1   0   3    9.04    0.37 
   0   0  -3  122.51    4.13 
   0   0  -3  124.43    4.16 
   0   0  -3  111.72    4.12 
   0   0  -3  116.84    4.13 
   0   0   3  111.04    4.13 
  -1   0  -3  291.61   10.30 
  -1   0  -3  304.26   10.31 
  -1   0  -3  295.21   10.40 
  -1   0  -3  284.05   10.28 
   1   0   3  301.89   10.36 
   1   0   3  280.74   10.35 
  -2   0  -3    1.15    0.07 
  -2   0  -3    1.27    0.07 
  -2   0  -3    1.18    0.08 
   2   0   3    1.22    0.08 
   2   0   3    1.21    0.06 
  -3   0  -3   21.88    0.83 
  -3   0  -3   21.83    0.79 
  -3   0  -3   21.55    0.81 
  -3   0  -3   21.47    0.81 
   3   0   3   21.27    0.81 
   3   0   3   21.91    0.79 
  -4   0  -3   71.44    2.54 
  -4   0  -3   72.39    2.51 
  -4   0  -3   69.14    2.54 
  -4   0  -3   68.83    2.56 
   4   0   3   70.13    2.54 
   4   0   3   72.30    2.53 
  -5   0  -3   43.32    1.58 
  -5   0  -3   43.62    1.55 
  -5   0  -3   42.05    1.61 
  -5   0  -3   42.47    1.60 
   5   0   3   43.31    1.59 
   5   0   3   43.14    1.58 
  -6   0  -3   14.35    0.63 
  -6   0  -3   14.81    0.65 
  -6   0  -3   14.81    0.58 
  -6   0  -3   15.43    0.62 
   6   0   3   14.71    0.60 
   6   0   3   14.36    0.61 
  -7   0  -3    1.92    0.14 
  -7   0  -3    1.77    0.20 
  -7   0  -3    1.78    0.19 
  -7   0  -3    1.90    0.16 
   7   0   3    1.94    0.17 
   7   0   3    2.00    0.16 
  -8   0  -3    0.30    0.11 
  -8   0  -3    0.25    0.13 
  -8   0  -3    0.17    0.07 
   8   0   3    0.15    0.07 
  -9   0  -3    8.78    0.49 
  -9   0  -3    9.36    0.41 
  -9   0  -3    8.94    0.51 
   9   0   3    8.30    0.45 
 -10   0  -3    7.10    0.44 
 -10   0  -3    6.66    0.35 
 -10   0  -3    6.88    0.46 
  10   0   3    6.53    0.39 
 -11   0  -3    3.48    0.24 
 -11   0  -3    3.91    0.34 
 -11   0  -3    3.20    0.34 
  11   0   3    3.19    0.28 
  11  -1  -3   -0.05    0.11 
 -11   1   3   -0.06    0.09 
  10  -1  -3    3.58    0.32 
 -10   1   3    3.36    0.25 
 -10   1   3    2.69    0.35 
   9  -1  -3   -0.02    0.08 
  -9   1   3    0.03    0.07 
  -9   1   3    0.14    0.14 
  -9   1   3    0.04    0.12 
   8  -1  -3    3.74    0.28 
  -8   1   3    3.46    0.33 
  -8   1   3    3.68    0.23 
   7  -1  -3    4.94    0.31 
  -7   1   3    4.24    0.35 
  -7   1   3    4.49    0.25 
   6  -1  -3   75.40    2.78 
   6  -1  -3   75.86    2.75 
  -6   1   3   77.65    2.82 
  -6   1   3   74.91    2.75 
  -6   1   3   73.76    2.71 
   5  -1  -3    0.39    0.09 
   5  -1  -3    0.14    0.05 
  -5   1   3    0.20    0.07 
  -5   1   3    0.21    0.06 
  -5   1   3    0.28    0.10 
  -5   1   3    0.16    0.05 
   4  -1  -3    8.91    0.40 
   4  -1  -3    8.77    0.38 
  -4   1   3    9.29    0.39 
  -4   1   3    8.35    0.42 
  -4   1   3    8.03    0.37 
   3  -1  -3   33.16    1.26 
   3  -1  -3   34.04    1.27 
  -3   1   3   32.97    1.25 
  -3   1   3   31.51    1.26 
  -3   1   3   38.69    1.25 
  -3   1   3   35.30    1.29 
   2  -1  -3   38.71    1.40 
   2  -1  -3   40.13    1.41 
   2  -1  -3   38.72    1.39 
  -2   1   3   37.41    1.40 
  -2   1   3   40.69    1.41 
  -2   1   3   40.35    1.43 
  -2   1   3   34.40    1.39 
  -2   1   3   39.95    1.39 
   1  -1  -3    1.42    0.08 
   1  -1  -3    1.38    0.09 
   1  -1  -3    1.41    0.08 
  -1   1   3    1.28    0.09 
  -1   1   3    1.50    0.09 
  -1   1   3    1.51    0.08 
   0  -1  -3   35.90    1.39 
   0  -1  -3   39.90    1.39 
   0  -1  -3   39.81    1.40 
   0  -1  -3   39.06    1.40 
   0  -1  -3   41.16    1.39 
   0   1   3   38.69    1.39 
   0   1   3   40.40    1.40 
  -1  -1  -3  295.43   10.53 
  -1  -1  -3  311.32   10.59 
   1   1   3  296.77   10.59 
   1   1   3  293.52   10.54 
  -2  -1  -3  236.56    8.11 
  -2  -1  -3  217.36    8.04 
  -2  -1  -3  221.04    8.05 
  -2  -1  -3  235.22    8.15 
   2   1   3  232.03    8.13 
   2   1   3  232.84    8.08 
   2   1   3  232.78    8.09 
  -3  -1  -3   73.69    2.68 
  -3  -1  -3   74.52    2.66 
  -3  -1  -3   73.47    2.68 
  -3  -1  -3   76.57    2.71 
   3   1   3   78.00    2.68 
   3   1   3   75.55    2.67 
  -4  -1  -3    0.20    0.04 
  -4  -1  -3    0.16    0.05 
  -4  -1  -3    0.14    0.07 
  -4  -1  -3    0.18    0.04 
   4   1   3    0.12    0.04 
   4   1   3    0.12    0.04 
  -5  -1  -3    9.43    0.40 
  -5  -1  -3    9.43    0.44 
  -5  -1  -3    8.80    0.38 
  -5  -1  -3    9.45    0.42 
   5   1   3    9.35    0.40 
   5   1   3    9.23    0.40 
  -6  -1  -3    2.57    0.16 
  -6  -1  -3    2.31    0.22 
  -6  -1  -3    2.58    0.15 
  -6  -1  -3    2.15    0.18 
   6   1   3    2.36    0.17 
   6   1   3    2.22    0.16 
  -7  -1  -3    4.91    0.26 
  -7  -1  -3    5.85    0.35 
  -7  -1  -3    5.20    0.31 
   7   1   3    5.30    0.29 
   7   1   3    5.07    0.28 
  -8  -1  -3    0.60    0.14 
  -8  -1  -3    0.74    0.16 
  -8  -1  -3    0.82    0.13 
   8   1   3    0.72    0.12 
   8   1   3    0.57    0.11 
  -9  -1  -3   29.98    1.22 
  -9  -1  -3   28.93    1.23 
  -9  -1  -3   28.65    1.12 
   9   1   3   28.89    1.17 
 -10  -1  -3    6.06    0.40 
 -10  -1  -3    5.61    0.40 
 -10  -1  -3    4.99    0.30 
  10   1   3    4.88    0.34 
 -11  -1  -3    0.05    0.14 
 -11  -1  -3    0.05    0.09 
 -11  -1  -3    0.16    0.15 
  11   1   3    0.16    0.11 
 -12  -1  -3    0.40    0.12 
 -12  -1  -3    0.43    0.20 
  12   1   3    0.41    0.13 
  10  -2  -3    1.35    0.22 
 -10   2   3    1.19    0.17 
 -10   2   3    1.52    0.28 
   9  -2  -3   14.16    0.71 
  -9   2   3   14.64    0.62 
  -9   2   3   15.81    0.77 
   8  -2  -3    9.00    0.48 
  -8   2   3    9.02    0.52 
  -8   2   3    8.55    0.40 
   7  -2  -3   12.33    0.57 
  -7   2   3   11.99    0.55 
  -7   2   3   12.30    0.56 
  -7   2   3   12.15    0.61 
  -7   2   3   11.37    0.50 
   6  -2  -3    1.11    0.18 
   6  -2  -3    0.99    0.14 
  -6   2   3    1.11    0.13 
  -6   2   3    0.91    0.14 
  -6   2   3    0.99    0.18 
  -6   2   3    1.03    0.11 
   5  -2  -3   18.90    0.80 
   5  -2  -3   19.81    0.78 
  -5   2   3   19.33    0.82 
  -5   2   3   19.86    0.75 
  -5   2   3   19.27    0.78 
  -5   2   3   20.20    0.78 
   4  -2  -3    2.07    0.15 
   4  -2  -3    1.65    0.12 
  -4   2   3    1.76    0.17 
  -4   2   3    1.46    0.11 
  -4   2   3    1.50    0.12 
  -4   2   3    1.53    0.13 
   3  -2  -3  100.54    3.44 
   3  -2  -3   98.91    3.45 
  -3   2   3   98.61    3.47 
  -3   2   3   97.66    3.41 
  -3   2   3   86.55    3.42 
  -3   2   3   97.34    3.44 
   2  -2  -3  116.28    4.29 
   2  -2  -3  125.12    4.30 
   2  -2  -3  117.20    4.27 
  -2   2   3  120.49    4.29 
  -2   2   3  122.86    4.27 
  -2   2   3  127.99    4.27 
  -2   2   3  119.24    4.31 
   1  -2  -3    5.88    0.25 
   1  -2  -3    6.43    0.24 
  -1   2   3    6.44    0.26 
  -1   2   3    5.86    0.23 
  -1   2   3    7.01    0.26 
  -1   2   3    6.07    0.25 
  -1   2   3    6.19    0.24 
  -1   2   3    5.50    0.23 
   0  -2  -3    0.02    0.02 
   0  -2  -3    0.05    0.03 
   0  -2  -3   -0.01    0.02 
   0  -2  -3    0.04    0.02 
   0   2   3   -0.02    0.02 
   0   2   3    0.03    0.03 
   0   2   3    0.10    0.02 
   0   2   3   -0.01    0.02 
  -1  -2  -3  287.78   10.80 
  -1  -2  -3  311.81   10.76 
   1   2   3  306.21   10.74 
   1   2   3  301.29   10.78 
   1   2   3  321.76   10.74 
  -2  -2  -3   25.89    0.93 
  -2  -2  -3   25.18    0.96 
  -2  -2  -3   26.95    0.93 
   2   2   3   25.74    0.94 
   2   2   3   25.17    0.92 
   2   2   3   26.52    0.93 
   2   2   3   25.11    0.94 
   2   2   3   26.22    0.92 
  -3  -2  -3    5.07    0.23 
  -3  -2  -3    4.93    0.21 
  -3  -2  -3    5.31    0.25 
   3   2   3    5.09    0.22 
   3   2   3    5.12    0.23 
   3   2   3    5.11    0.20 
  -4  -2  -3   38.78    1.43 
  -4  -2  -3   36.97    1.41 
  -4  -2  -3   38.82    1.37 
   4   2   3   37.70    1.40 
   4   2   3   38.49    1.39 
  -5  -2  -3   28.17    1.10 
  -5  -2  -3   27.42    1.05 
  -5  -2  -3   28.50    1.08 
  -5  -2  -3   27.84    1.03 
   5   2   3   28.21    1.06 
   5   2   3   28.28    1.06 
  -6  -2  -3    1.70    0.18 
  -6  -2  -3    1.60    0.13 
  -6  -2  -3    1.62    0.12 
  -6  -2  -3    1.34    0.17 
   6   2   3    1.53    0.13 
   6   2   3    1.66    0.14 
  -7  -2  -3   34.99    1.32 
  -7  -2  -3   35.23    1.41 
  -7  -2  -3   35.81    1.40 
   7   2   3   37.10    1.37 
   7   2   3   35.35    1.36 
  -8  -2  -3   15.95    0.74 
  -8  -2  -3   15.06    0.71 
  -8  -2  -3   15.81    0.64 
   8   2   3   15.57    0.68 
   8   2   3   15.75    0.68 
  -9  -2  -3    6.84    0.43 
  -9  -2  -3    7.17    0.45 
  -9  -2  -3    7.09    0.35 
   9   2   3    6.72    0.39 
   9   2   3    7.31    0.39 
 -10  -2  -3    0.17    0.14 
 -10  -2  -3    0.42    0.10 
 -10  -2  -3    0.35    0.13 
  10   2   3    0.37    0.11 
 -11  -2  -3   -0.11    0.12 
 -11  -2  -3    0.07    0.09 
 -11  -2  -3    0.08    0.15 
  11   2   3    0.18    0.11 
 -12  -2  -3    0.46    0.13 
 -12  -2  -3    0.51    0.20 
  12   2   3    0.46    0.14 
  10  -3  -3    1.78    0.26 
 -10   3   3    2.63    0.20 
 -10   3   3    2.35    0.31 
   9  -3  -3    1.98    0.23 
  -9   3   3    2.60    0.30 
  -9   3   3    2.20    0.18 
   8  -3  -3   12.56    0.61 
  -8   3   3   13.12    0.59 
  -8   3   3   11.53    0.51 
  -8   3   3   12.52    0.64 
   7  -3  -3   14.55    0.68 
  -7   3   3   14.27    0.60 
  -7   3   3   14.51    0.65 
  -7   3   3   17.25    0.67 
  -7   3   3   14.71    0.71 
   6  -3  -3    1.90    0.17 
  -6   3   3    1.53    0.20 
  -6   3   3    1.70    0.16 
  -6   3   3    1.64    0.13 
  -6   3   3    1.87    0.17 
   5  -3  -3    2.09    0.17 
   5  -3  -3    1.93    0.14 
  -5   3   3    1.95    0.12 
  -5   3   3    1.88    0.15 
  -5   3   3    1.91    0.19 
  -5   3   3    1.83    0.15 
   4  -3  -3   45.07    1.68 
   4  -3  -3   46.30    1.71 
  -4   3   3   47.42    1.72 
  -4   3   3   44.52    1.65 
  -4   3   3   45.08    1.69 
  -4   3   3   47.83    1.68 
   3  -3  -3  116.56    4.00 
   3  -3  -3  113.70    3.96 
  -3   3   3  108.80    3.95 
  -3   3   3  116.51    3.97 
  -3   3   3  113.15    3.99 
  -3   3   3   97.16    3.95 
  -3   3   3  120.12    4.01 
   2  -3  -3    7.08    0.31 
   2  -3  -3    7.07    0.28 
  -2   3   3    6.94    0.27 
  -2   3   3    7.38    0.28 
  -2   3   3    7.88    0.27 
  -2   3   3    7.03    0.31 
  -2   3   3    6.55    0.30 
   1  -3  -3    0.08    0.03 
   1  -3  -3    0.07    0.02 
  -1   3   3    0.07    0.03 
  -1   3   3    0.08    0.03 
   0  -3  -3   43.32    1.80 
   0  -3  -3   50.88    1.79 
   0  -3  -3   53.32    1.78 
   0   3   3   51.63    1.80 
   0   3   3   53.78    1.79 
  -1  -3  -3   14.09    0.51 
  -1  -3  -3   14.17    0.51 
  -1  -3  -3   15.08    0.54 
   1   3   3   13.88    0.52 
  -2  -3  -3    8.42    0.31 
  -2  -3  -3    8.17    0.35 
  -2  -3  -3    9.06    0.33 
   2   3   3    8.45    0.32 
   2   3   3    8.65    0.33 
   2   3   3    8.31    0.33 
  -3  -3  -3    2.84    0.13 
  -3  -3  -3    2.83    0.17 
  -3  -3  -3    3.01    0.16 
   3   3   3    2.91    0.15 
   3   3   3    2.95    0.15 
  -4  -3  -3    8.74    0.40 
  -4  -3  -3    8.82    0.34 
  -4  -3  -3    8.40    0.38 
   4   3   3    8.68    0.32 
   4   3   3    8.67    0.37 
   4   3   3    8.87    0.36 
  -5  -3  -3   57.88    2.11 
  -5  -3  -3   59.74    2.17 
  -5  -3  -3   61.19    2.19 
   5   3   3   58.19    2.09 
   5   3   3   58.35    2.14 
   5   3   3   59.14    2.14 
  -6  -3  -3    8.74    0.37 
  -6  -3  -3    8.54    0.44 
   6   3   3    9.10    0.41 
   6   3   3    8.90    0.40 
  -7  -3  -3   20.16    0.87 
  -7  -3  -3   20.82    0.90 
  -7  -3  -3   19.82    0.80 
   7   3   3   22.08    0.84 
   7   3   3   20.53    0.84 
  -8  -3  -3    4.66    0.35 
  -8  -3  -3    4.30    0.25 
  -8  -3  -3    4.37    0.31 
   8   3   3    3.98    0.27 
   8   3   3    4.33    0.28 
  -9  -3  -3    0.37    0.09 
  -9  -3  -3    0.35    0.15 
  -9  -3  -3    0.43    0.16 
   9   3   3    0.39    0.10 
   9   3   3    0.21    0.09 
 -10  -3  -3    0.05    0.13 
 -10  -3  -3    0.13    0.08 
 -10  -3  -3    0.15    0.16 
  10   3   3    0.13    0.10 
  10   3   3    0.07    0.08 
 -11  -3  -3    0.93    0.22 
 -11  -3  -3    1.20    0.19 
 -11  -3  -3    0.78    0.20 
  11   3   3    1.17    0.20 
 -12  -3  -3    5.67    0.36 
 -12  -3  -3    5.81    0.49 
  12   3   3    5.91    0.40 
  10  -4  -3    0.28    0.14 
 -10   4   3    0.42    0.19 
 -10   4   3    0.36    0.08 
   9  -4  -3   23.77    1.06 
  -9   4   3   24.23    0.93 
  -9   4   3   25.06    1.09 
   8  -4  -3   22.73    0.96 
  -8   4   3   20.97    0.93 
  -8   4   3   21.92    0.84 
  -8   4   3   22.68    0.98 
   7  -4  -3    2.11    0.21 
  -7   4   3    2.64    0.21 
  -7   4   3    2.50    0.21 
  -7   4   3    2.30    0.15 
  -7   4   3    2.02    0.22 
   6  -4  -3    7.77    0.41 
  -6   4   3    8.07    0.43 
  -6   4   3    8.43    0.40 
  -6   4   3    7.68    0.38 
  -6   4   3    8.02    0.33 
   5  -4  -3    0.04    0.06 
  -5   4   3    0.15    0.04 
  -5   4   3    0.09    0.05 
  -5   4   3    0.03    0.07 
  -5   4   3    0.18    0.06 
   4  -4  -3   14.66    0.63 
  -4   4   3   15.78    0.56 
  -4   4   3   16.28    0.65 
  -4   4   3   15.12    0.57 
  -4   4   3   15.38    0.63 
  -4   4   3   15.22    0.60 
   3  -4  -3   40.84    1.56 
   3  -4  -3   41.91    1.52 
  -3   4   3   47.34    1.56 
  -3   4   3   40.36    1.49 
  -3   4   3   41.92    1.56 
  -3   4   3   42.04    1.52 
   2  -4  -3  123.54    4.10 
   2  -4  -3  122.37    4.14 
  -2   4   3  115.35    4.13 
  -2   4   3  101.10    4.12 
  -2   4   3  120.22    4.10 
   1  -4  -3   10.20    0.41 
  -1   4   3   10.34    0.40 
  -1   4   3   10.61    0.41 
   0  -4  -3   10.58    0.42 
   0  -4  -3   11.59    0.41 
   0   4   3   10.61    0.41 
   0   4   3   11.07    0.41 
   0   4   3   11.10    0.41 
  -1  -4  -3   56.33    1.95 
  -1  -4  -3   55.11    1.95 
  -1  -4  -3   58.58    1.97 
   1   4   3   52.47    1.94 
   1   4   3   53.09    1.94 
  -2  -4  -3   21.46    0.77 
  -2  -4  -3   20.56    0.74 
   2   4   3   20.77    0.73 
   2   4   3   20.29    0.75 
   2   4   3   17.81    0.72 
  -3  -4  -3   27.43    1.05 
  -3  -4  -3   28.57    1.03 
   3   4   3   27.17    1.02 
   3   4   3   28.05    1.01 
  -4  -4  -3    2.28    0.17 
  -4  -4  -3    2.12    0.15 
  -4  -4  -3    2.16    0.11 
   4   4   3    2.13    0.13 
   4   4   3    2.25    0.13 
  -5  -4  -3    4.44    0.19 
  -5  -4  -3    3.84    0.25 
  -5  -4  -3    4.17    0.26 
   5   4   3    4.19    0.22 
   5   4   3    3.98    0.21 
  -6  -4  -3   16.05    0.70 
  -6  -4  -3   15.70    0.71 
  -6  -4  -3   16.21    0.62 
   6   4   3   15.73    0.66 
   6   4   3   16.26    0.65 
  -7  -4  -3    8.16    0.37 
  -7  -4  -3    8.55    0.46 
  -7  -4  -3    8.48    0.47 
   7   4   3    8.40    0.40 
   7   4   3    8.49    0.41 
  -8  -4  -3   34.33    1.26 
  -8  -4  -3   33.60    1.36 
  -8  -4  -3   32.68    1.37 
   8   4   3   32.78    1.30 
   8   4   3   33.63    1.31 
  -9  -4  -3    1.60    0.25 
  -9  -4  -3    1.77    0.28 
  -9  -4  -3    1.55    0.16 
   9   4   3    2.00    0.19 
   9   4   3    2.07    0.20 
 -10  -4  -3    1.45    0.18 
 -10  -4  -3    1.48    0.26 
 -10  -4  -3    1.35    0.25 
  10   4   3    1.74    0.20 
  10   4   3    1.56    0.19 
 -11  -4  -3    2.63    0.34 
 -11  -4  -3    3.02    0.25 
 -11  -4  -3    2.60    0.33 
  11   4   3    3.11    0.28 
  11   4   3    2.68    0.27 
 -12  -4  -3    2.41    0.38 
 -12  -4  -3    2.77    0.26 
  12   4   3    2.69    0.27 
  10  -5  -3    5.59    0.41 
   9  -5  -3    4.54    0.35 
  -9   5   3    5.15    0.37 
  -9   5   3    5.16    0.23 
   8  -5  -3    0.11    0.10 
  -8   5   3    0.11    0.04 
  -8   5   3    0.18    0.09 
  -8   5   3    0.18    0.11 
   7  -5  -3    0.90    0.16 
  -7   5   3    1.25    0.09 
  -7   5   3    1.00    0.18 
  -7   5   3    1.08    0.16 
   6  -5  -3    3.90    0.27 
  -6   5   3    3.97    0.24 
  -6   5   3    5.02    0.29 
  -6   5   3    4.30    0.29 
  -6   5   3    4.31    0.18 
   5  -5  -3    5.06    0.30 
  -5   5   3    5.18    0.29 
  -5   5   3    5.75    0.27 
  -5   5   3    5.25    0.31 
   4  -5  -3   77.43    2.72 
  -4   5   3   80.01    2.72 
  -4   5   3   68.33    2.69 
  -4   5   3   73.06    2.67 
   3  -5  -3   38.87    1.35 
   3  -5  -3   37.80    1.40 
  -3   5   3   35.11    1.39 
  -3   5   3   38.10    1.38 
  -3   5   3   37.53    1.35 
   2  -5  -3    2.10    0.10 
   2  -5  -3    2.13    0.14 
  -2   5   3    2.07    0.11 
  -2   5   3    2.18    0.13 
  -2   5   3    2.22    0.14 
   1  -5  -3   56.03    2.05 
  -1   5   3   58.82    2.04 
  -1   5   3   56.83    2.03 
   0  -5  -3   19.03    0.70 
   0   5   3   18.59    0.69 
   0   5   3   18.72    0.67 
  -1  -5  -3   66.87    2.17 
  -1  -5  -3   64.04    2.16 
   1   5   3   58.69    2.12 
   1   5   3   52.42    2.12 
  -2  -5  -3    0.81    0.08 
  -2  -5  -3    0.75    0.07 
   2   5   3    0.75    0.05 
   2   5   3    0.81    0.05 
  -3  -5  -3   43.18    1.58 
  -3  -5  -3   44.51    1.60 
   3   5   3   44.14    1.54 
   3   5   3   40.36    1.54 
   3   5   3   43.33    1.56 
  -4  -5  -3    1.87    0.16 
  -4  -5  -3    2.12    0.15 
   4   5   3    1.90    0.11 
   4   5   3    1.85    0.11 
  -5  -5  -3   29.94    1.13 
  -5  -5  -3   29.55    1.15 
  -5  -5  -3   28.55    1.05 
   5   5   3   29.05    1.10 
   5   5   3   28.20    1.08 
  -6  -5  -3   37.64    1.46 
  -6  -5  -3   38.31    1.38 
  -6  -5  -3   37.24    1.48 
   6   5   3   38.72    1.42 
   6   5   3   36.83    1.41 
  -7  -5  -3    6.57    0.31 
  -7  -5  -3    6.07    0.37 
  -7  -5  -3    6.86    0.40 
   7   5   3    6.10    0.33 
   7   5   3    6.62    0.33 
  -8  -5  -3    4.13    0.35 
  -8  -5  -3    4.12    0.33 
   8   5   3    4.27    0.27 
   8   5   3    4.42    0.27 
  -9  -5  -3    0.14    0.15 
  -9  -5  -3    0.08    0.13 
   9   5   3   -0.03    0.06 
   9   5   3   -0.05    0.06 
 -10  -5  -3    2.28    0.31 
 -10  -5  -3    1.95    0.32 
  10   5   3    1.92    0.22 
  10   5   3    1.98    0.21 
 -11  -5  -3    2.01    0.33 
 -11  -5  -3    2.19    0.30 
  11   5   3    2.41    0.26 
  11   5   3    2.40    0.26 
  10  -6  -3    0.00    0.11 
   9  -6  -3    0.55    0.15 
  -9   6   3    1.31    0.21 
  -9   6   3    0.72    0.15 
   8  -6  -3    1.73    0.22 
  -8   6   3    1.73    0.21 
  -8   6   3    1.81    0.22 
   7  -6  -3    1.31    0.19 
  -7   6   3    1.29    0.20 
  -7   6   3    1.75    0.20 
   6  -6  -3    6.63    0.37 
  -6   6   3    6.66    0.38 
  -6   6   3    6.57    0.36 
   5  -6  -3   74.15    2.73 
  -5   6   3   71.66    2.71 
  -5   6   3   77.92    2.74 
  -5   6   3   74.19    2.68 
   4  -6  -3    0.69    0.12 
   4  -6  -3    0.55    0.07 
  -4   6   3    0.46    0.07 
  -4   6   3    0.38    0.09 
   3  -6  -3    0.44    0.08 
   3  -6  -3    0.73    0.06 
  -3   6   3    0.62    0.09 
  -3   6   3    0.50    0.06 
  -3   6   3    0.58    0.08 
   2  -6  -3    1.65    0.13 
  -2   6   3    1.90    0.12 
  -2   6   3    1.80    0.11 
  -2   6   3    1.93    0.13 
  -2   6   3    2.06    0.12 
   1  -6  -3   64.61    2.39 
  -1   6   3   67.82    2.36 
  -1   6   3   64.93    2.36 
  -1   6   3   69.00    2.39 
   0  -6  -3    1.95    0.12 
   0   6   3    2.09    0.09 
   0   6   3    1.86    0.09 
  -1  -6  -3    5.12    0.22 
  -1  -6  -3    4.96    0.24 
  -1  -6  -3    5.00    0.23 
  -2  -6  -3   54.95    1.97 
  -2  -6  -3   55.11    1.95 
   2   6   3   53.35    1.90 
   2   6   3   52.47    1.90 
  -3  -6  -3   16.81    0.68 
  -3  -6  -3   17.16    0.67 
   3   6   3   16.47    0.62 
   3   6   3   16.63    0.65 
   3   6   3   16.75    0.62 
  -4  -6  -3   67.04    2.49 
  -4  -6  -3   68.49    2.48 
   4   6   3   74.41    2.43 
   4   6   3   67.80    2.45 
   4   6   3   61.76    2.42 
  -5  -6  -3   22.87    0.91 
  -5  -6  -3   22.58    0.93 
   5   6   3   22.19    0.85 
   5   6   3   22.10    0.87 
  -6  -6  -3    2.76    0.23 
  -6  -6  -3    2.97    0.24 
   6   6   3    2.65    0.18 
   6   6   3    2.76    0.19 
  -7  -6  -3    4.24    0.32 
  -7  -6  -3    5.11    0.34 
   7   6   3    4.54    0.26 
   7   6   3    4.85    0.28 
  -8  -6  -3    0.48    0.15 
  -8  -6  -3    0.55    0.16 
   8   6   3    0.52    0.10 
   8   6   3    0.47    0.11 
  -9  -6  -3    0.86    0.20 
  -9  -6  -3    0.80    0.19 
   9   6   3    1.48    0.17 
   9   6   3    1.08    0.16 
 -10  -6  -3   18.09    0.89 
 -10  -6  -3   16.92    0.85 
  10   6   3   16.55    0.76 
  10   6   3   16.09    0.76 
 -11  -6  -3   11.23    0.68 
 -11  -6  -3   10.92    0.71 
  11   6   3   11.99    0.60 
  11   6   3   11.55    0.59 
   9  -7  -3    4.67    0.36 
  -9   7   3    4.36    0.33 
  -9   7   3    4.28    0.34 
   8  -7  -3    1.42    0.21 
  -8   7   3    1.24    0.21 
  -8   7   3    1.46    0.22 
   7  -7  -3   15.49    0.74 
  -7   7   3   17.63    0.74 
  -7   7   3   15.63    0.74 
   6  -7  -3   20.94    0.90 
  -6   7   3   22.70    0.89 
  -6   7   3   20.91    0.90 
   5  -7  -3   23.08    0.95 
  -5   7   3   22.35    0.90 
  -5   7   3   24.94    0.94 
  -5   7   3   23.32    0.95 
   4  -7  -3    1.06    0.14 
  -4   7   3    0.94    0.10 
  -4   7   3    1.17    0.12 
  -4   7   3    1.07    0.13 
   3  -7  -3    3.24    0.20 
  -3   7   3    3.06    0.20 
  -3   7   3    3.69    0.19 
  -3   7   3    3.13    0.17 
   2  -7  -3    0.04    0.04 
  -2   7   3    0.05    0.03 
  -2   7   3    0.11    0.04 
  -2   7   3    0.10    0.05 
  -2   7   3    0.02    0.03 
   1  -7  -3   65.34    2.24 
  -1   7   3   53.32    2.20 
  -1   7   3   62.94    2.21 
  -1   7   3   67.13    2.25 
   0  -7  -3   88.41    3.22 
   0   7   3   88.40    3.18 
   0   7   3   94.33    3.18 
  -1  -7  -3    8.33    0.34 
  -1  -7  -3    7.84    0.35 
  -1  -7  -3    8.02    0.36 
  -2  -7  -3   19.72    0.76 
  -2  -7  -3   18.40    0.74 
  -3  -7  -3   89.12    3.12 
  -3  -7  -3   87.39    3.10 
   3   7   3   82.09    3.03 
   3   7   3   83.78    3.03 
   3   7   3   87.48    3.07 
  -4  -7  -3    5.98    0.32 
  -4  -7  -3    5.29    0.29 
   4   7   3    5.25    0.23 
   4   7   3    5.24    0.26 
   4   7   3    5.65    0.24 
  -5  -7  -3   21.69    0.89 
  -5  -7  -3   21.16    0.87 
   5   7   3   20.20    0.80 
   5   7   3   20.64    0.82 
  -6  -7  -3   13.25    0.60 
  -6  -7  -3   13.00    0.61 
   6   7   3   10.33    0.51 
   6   7   3   13.07    0.54 
  -7  -7  -3    1.34    0.20 
  -7  -7  -3    1.38    0.21 
   7   7   3    1.40    0.15 
   7   7   3    1.38    0.14 
  -8  -7  -3    9.58    0.54 
  -8  -7  -3    9.71    0.55 
   8   7   3    9.70    0.46 
   8   7   3    9.49    0.47 
  -9  -7  -3   30.25    1.33 
  -9  -7  -3   30.86    1.35 
   9   7   3   31.20    1.24 
   9   7   3   32.18    1.26 
 -10  -7  -3    7.18    0.52 
 -10  -7  -3    7.78    0.54 
  10   7   3    8.05    0.44 
  10   7   3    7.86    0.45 
 -11  -7  -3    1.19    0.25 
 -11  -7  -3    1.11    0.28 
  11   7   3    1.60    0.22 
  11   7   3    1.52    0.22 
   9  -8  -3    2.20    0.27 
  -9   8   3    2.71    0.27 
   8  -8  -3    0.90    0.17 
  -8   8   3    1.12    0.18 
  -8   8   3    1.10    0.18 
   7  -8  -3    6.76    0.41 
  -7   8   3    7.20    0.40 
  -7   8   3    6.84    0.41 
   6  -8  -3   27.51    1.13 
  -6   8   3   28.39    1.13 
  -6   8   3   27.25    1.11 
   5  -8  -3    5.20    0.31 
  -5   8   3    5.10    0.29 
  -5   8   3    5.06    0.31 
   4  -8  -3   22.30    0.91 
  -4   8   3   22.82    0.88 
  -4   8   3   22.74    0.89 
  -4   8   3   22.85    0.91 
   3  -8  -3    4.89    0.27 
  -3   8   3    4.94    0.27 
  -3   8   3    4.87    0.25 
  -3   8   3    5.29    0.26 
   2  -8  -3   45.30    1.70 
  -2   8   3   46.40    1.67 
  -2   8   3   46.50    1.71 
   1  -8  -3   37.59    1.37 
  -1   8   3   36.77    1.34 
  -1   8   3   36.89    1.38 
   0  -8  -3    7.92    0.36 
   0   8   3    7.83    0.31 
   0   8   3    9.24    0.32 
  -1  -8  -3    3.96    0.20 
  -1  -8  -3    3.70    0.21 
  -2  -8  -3   15.65    0.65 
  -2  -8  -3   16.10    0.66 
  -3  -8  -3    8.39    0.40 
  -3  -8  -3    7.64    0.40 
   3   8   3    8.56    0.32 
   3   8   3    8.46    0.32 
  -4  -8  -3   34.95    1.30 
  -4  -8  -3   31.67    1.26 
   4   8   3   33.29    1.22 
   4   8   3   31.37    1.18 
   4   8   3   31.98    1.19 
  -5  -8  -3   39.29    1.50 
  -5  -8  -3   38.45    1.47 
   5   8   3   35.71    1.38 
   5   8   3   37.91    1.42 
  -6  -8  -3    0.59    0.15 
  -6  -8  -3    0.39    0.12 
   6   8   3    0.43    0.08 
   6   8   3    0.52    0.10 
  -7  -8  -3   15.38    0.77 
  -7  -8  -3   16.81    0.77 
   7   8   3   17.48    0.70 
   7   8   3   15.32    0.67 
  -8  -8  -3   20.99    0.97 
  -8  -8  -3   20.31    0.94 
   8   8   3   20.62    0.85 
   8   8   3   20.09    0.86 
  -9  -8  -3    6.32    0.48 
  -9  -8  -3    7.46    0.50 
   9   8   3    7.44    0.40 
   9   8   3    6.95    0.40 
 -10  -8  -3    0.98    0.23 
 -10  -8  -3    0.78    0.23 
  10   8   3    1.13    0.19 
  10   8   3    1.00    0.17 
 -11  -8  -3   -0.27    0.14 
 -11  -8  -3   -0.09    0.26 
  11   8   3    0.01    0.10 
  11   8   3    0.13    0.11 
   8  -9  -3    0.79    0.16 
  -8   9   3    0.52    0.14 
  -8   9   3    0.63    0.15 
   7  -9  -3   11.84    0.59 
  -7   9   3   10.70    0.56 
  -7   9   3   12.43    0.59 
   6  -9  -3   20.75    0.93 
  -6   9   3   22.63    0.93 
  -6   9   3   22.22    0.91 
   5  -9  -3    0.01    0.08 
  -5   9   3    0.02    0.06 
  -5   9   3    0.04    0.07 
   4  -9  -3    1.05    0.14 
  -4   9   3    0.97    0.13 
  -4   9   3    1.01    0.12 
   3  -9  -3    6.06    0.31 
  -3   9   3    5.97    0.32 
  -3   9   3    5.97    0.29 
  -3   9   3    5.25    0.28 
   2  -9  -3    1.84    0.15 
  -2   9   3    1.85    0.15 
  -2   9   3    1.87    0.13 
   1  -9  -3    8.56    0.37 
  -1   9   3    7.89    0.33 
  -1   9   3    7.86    0.33 
   0  -9  -3   34.73    1.28 
   0   9   3   34.01    1.22 
  -1  -9  -3    4.70    0.26 
  -1  -9  -3    4.05    0.22 
  -2  -9  -3   49.61    1.87 
  -2  -9  -3   50.47    1.88 
  -3  -9  -3    7.87    0.40 
  -3  -9  -3    7.39    0.38 
   3   9   3    7.30    0.29 
   3   9   3    7.69    0.29 
  -4  -9  -3    9.06    0.48 
  -4  -9  -3    9.29    0.46 
   4   9   3    9.13    0.37 
   4   9   3    9.95    0.38 
  -5  -9  -3    1.78    0.20 
  -5  -9  -3    2.22    0.22 
   5   9   3    1.81    0.13 
   5   9   3    2.08    0.16 
  -6  -9  -3    1.22    0.19 
  -6  -9  -3    1.20    0.19 
   6   9   3    0.86    0.11 
   6   9   3    1.35    0.15 
  -7  -9  -3    0.52    0.16 
  -7  -9  -3    0.30    0.13 
   7   9   3    0.40    0.09 
   7   9   3    0.33    0.08 
  -8  -9  -3    9.00    0.57 
  -8  -9  -3    9.51    0.56 
   8   9   3   10.01    0.46 
   8   9   3    9.43    0.48 
  -9  -9  -3    3.63    0.36 
  -9  -9  -3    3.71    0.38 
   9   9   3    3.56    0.26 
   9   9   3    3.59    0.28 
 -10  -9  -3    0.11    0.17 
 -10  -9  -3    0.28    0.19 
  10   9   3    0.32    0.11 
  10   9   3    0.17    0.11 
  -8  10   3   10.78    0.58 
  -7  10   3    1.49    0.21 
  -7  10   3    1.54    0.20 
   6 -10  -3    0.84    0.15 
  -6  10   3    1.16    0.18 
  -6  10   3    1.23    0.17 
   5 -10  -3    0.07    0.08 
  -5  10   3    0.21    0.09 
  -5  10   3    0.22    0.08 
   4 -10  -3    0.10    0.08 
  -4  10   3    0.01    0.05 
  -4  10   3    0.11    0.07 
   3 -10  -3   10.85    0.50 
  -3  10   3   11.01    0.51 
  -3  10   3   11.32    0.48 
   2 -10  -3   12.30    0.54 
  -2  10   3   12.86    0.56 
  -2  10   3   12.96    0.51 
   1 -10  -3   21.57    0.79 
  -1  10   3   18.30    0.74 
   0 -10  -3   -0.02    0.04 
   0  10   3   -0.01    0.02 
   0  10   3    0.03    0.02 
  -1 -10  -3   20.20    0.83 
  -1 -10  -3   19.86    0.78 
  -2 -10  -3    3.38    0.19 
  -2 -10  -3    3.04    0.23 
  -2 -10  -3    3.29    0.23 
  -3 -10  -3    0.16    0.07 
  -3 -10  -3    0.15    0.08 
   3  10   3    0.22    0.04 
   3  10   3    0.20    0.03 
  -4 -10  -3    8.54    0.47 
  -4 -10  -3    8.14    0.45 
   4  10   3    8.80    0.35 
  -5 -10  -3    0.30    0.12 
  -5 -10  -3   -0.01    0.08 
   5  10   3    0.15    0.05 
   5  10   3    0.01    0.06 
  -6 -10  -3    2.93    0.28 
  -6 -10  -3    2.95    0.28 
   6  10   3    2.88    0.18 
   6  10   3    2.84    0.21 
  -7 -10  -3    5.69    0.41 
  -7 -10  -3    5.31    0.39 
   7  10   3    4.95    0.30 
   7  10   3    5.02    0.28 
  -8 -10  -3    8.94    0.57 
  -8 -10  -3    8.74    0.55 
   8  10   3    8.94    0.44 
   8  10   3    9.00    0.46 
  -9 -10  -3    0.19    0.15 
  -9 -10  -3    0.09    0.16 
   9  10   3    0.28    0.10 
   9  10   3    0.07    0.09 
 -10 -10  -3    1.24    0.27 
 -10 -10  -3    1.06    0.26 
  10  10   3    1.21    0.20 
  10  10   3    1.19    0.20 
  -7  11   3    0.31    0.12 
  -6  11   3    1.98    0.22 
  -6  11   3    2.27    0.22 
  -5  11   3    0.13    0.08 
  -5  11   3    0.19    0.09 
  -4  11   3   33.18    1.29 
  -4  11   3   34.24    1.33 
   3 -11  -3   24.66    0.99 
  -3  11   3   24.83    1.01 
  -3  11   3   24.91    0.96 
   2 -11  -3    0.68    0.11 
  -2  11   3    0.51    0.08 
   1 -11  -3    4.97    0.26 
  -1  11   3    4.31    0.21 
   0 -11  -3    1.49    0.16 
   0 -11  -3    1.33    0.13 
   0  11   3    1.44    0.09 
   0  11   3    1.29    0.08 
  -1 -11  -3    1.20    0.11 
  -1 -11  -3    1.00    0.14 
  -2 -11  -3   12.19    0.59 
  -2 -11  -3   12.47    0.59 
  -2 -11  -3   12.62    0.52 
  -3 -11  -3   28.25    1.14 
  -3 -11  -3   27.37    1.14 
   3  11   3   26.55    0.99 
   3  11   3   28.57    0.99 
  -4 -11  -3    0.79    0.15 
  -4 -11  -3    0.95    0.18 
   4  11   3    0.93    0.08 
  -5 -11  -3    2.82    0.27 
  -5 -11  -3    2.32    0.24 
   5  11   3    2.73    0.16 
  -6 -11  -3    7.50    0.47 
  -6 -11  -3    7.61    0.49 
   6  11   3    7.27    0.38 
   6  11   3    8.08    0.36 
  -7 -11  -3    3.94    0.36 
  -7 -11  -3    5.29    0.41 
   7  11   3    4.87    0.27 
   7  11   3    4.74    0.29 
  -8 -11  -3    0.00    0.14 
  -8 -11  -3    0.02    0.14 
   8  11   3    0.16    0.10 
   8  11   3    0.03    0.07 
  -9 -11  -3   -0.20    0.13 
  -9 -11  -3   -0.05    0.13 
   9  11   3    0.04    0.09 
   9  11   3    0.01    0.09 
  -6  12   3    1.16    0.19 
  -5  12   3   11.92    0.60 
  -5  12   3   12.50    0.57 
  -4  12   3    3.52    0.24 
  -4  12   3    3.72    0.28 
  -3  12   3    2.67    0.19 
  -2  12   3    3.01    0.18 
  -1  12   3    0.06    0.04 
   0 -12  -3    5.86    0.31 
   0 -12  -3    6.05    0.36 
   0  12   3    6.29    0.25 
  -1 -12  -3    5.59    0.35 
  -1 -12  -3    5.73    0.35 
  -1 -12  -3    5.86    0.30 
   1  12   3    5.67    0.23 
   1  12   3    6.43    0.23 
  -2 -12  -3   30.42    1.27 
  -2 -12  -3   31.86    1.27 
  -2 -12  -3   31.00    1.18 
  -3 -12  -3    0.63    0.14 
  -3 -12  -3    0.57    0.14 
  -3 -12  -3    0.31    0.08 
   3  12   3    0.52    0.05 
  -4 -12  -3    1.28    0.21 
  -4 -12  -3    1.18    0.19 
   4  12   3    1.30    0.09 
  -5 -12  -3    9.37    0.55 
  -5 -12  -3    9.11    0.53 
   5  12   3    9.25    0.39 
  -6 -12  -3    3.39    0.32 
  -6 -12  -3    4.17    0.36 
   6  12   3    3.61    0.22 
  -7 -12  -3    0.23    0.14 
  -7 -12  -3    0.13    0.14 
   7  12   3    0.06    0.08 
   7  12   3    0.23    0.07 
  -8 -12  -3    0.00    0.13 
  -8 -12  -3   -0.08    0.13 
   8  12   3    0.00    0.08 
   8  12   3    0.00    0.07 
  -5  13   3    0.14    0.09 
  -4  13   3    4.05    0.26 
  -3  13   3    5.85    0.31 
  -2  13   3    0.09    0.05 
  -1  13   3   11.65    0.47 
   0 -13  -3    5.85    0.37 
   0  13   3    6.05    0.25 
  -1 -13  -3    3.91    0.29 
  -1 -13  -3    3.60    0.28 
   1  13   3    3.41    0.15 
  -2 -13  -3    0.35    0.12 
  -2 -13  -3    0.58    0.14 
  -3 -13  -3    0.07    0.08 
  -3 -13  -3    0.05    0.09 
   3  13   3    0.03    0.02 
  -4 -13  -3    1.93    0.24 
  -4 -13  -3    1.78    0.24 
   4  13   3    1.75    0.11 
  -5 -13  -3    1.19    0.22 
  -5 -13  -3    0.89    0.18 
   5  13   3    1.23    0.11 
  -6 -13  -3    3.05    0.32 
  -6 -13  -3    3.01    0.34 
   6  13   3    3.14    0.19 
  -7 -13  -3    0.84    0.21 
  -7 -13  -3    0.79    0.21 
   7  13   3    1.01    0.14 
  -3  14   3    1.86    0.17 
  -2  14   3    0.08    0.06 
   1 -14  -3    2.23    0.23 
  -1  14   3    2.40    0.15 
   0 -14  -3    0.13    0.10 
   0  14   3    0.11    0.04 
  -1 -14  -3    0.07    0.09 
  -1 -14  -3    0.21    0.11 
   1  14   3    0.26    0.04 
  -2 -14  -3    0.09    0.10 
  -2 -14  -3    0.17    0.10 
  -3 -14  -3    0.20    0.11 
  -3 -14  -3    0.07    0.11 
  -4 -14  -3    0.85    0.19 
  -4 -14  -3    1.08    0.20 
   4  14   3    1.02    0.08 
  -5 -14  -3    1.38    0.23 
  -5 -14  -3    0.98    0.22 
   5  14   3    1.41    0.11 
  -6 -14  -3    2.94    0.33 
  -6 -14  -3    2.51    0.33 
   6  14   3    2.59    0.17 
   1 -15  -3    0.11    0.10 
  -1  15   3    0.05    0.05 
   0 -15  -3    4.00    0.33 
   0  15   3    3.99    0.19 
  -1 -15  -3    0.01    0.10 
  -1 -15  -3    0.05    0.10 
   1  15   3    0.00    0.03 
  -2 -15  -3    1.37    0.23 
  -2 -15  -3    1.68    0.24 
  -3 -15  -3    4.72    0.38 
  -3 -15  -3    4.18    0.35 
  -4 -15  -3    0.51    0.17 
  -4 -15  -3    0.31    0.15 
   4  15   3    0.42    0.06 
   4  11  -4    0.40    0.10 
  -4 -11   4    0.40    0.17 
   3  11  -4    1.05    0.15 
  -3 -11   4    1.48    0.25 
   2  11  -4    0.10    0.07 
   1  11  -4    3.31    0.22 
  -1 -11   4    3.37    0.36 
   0  11  -4    0.57    0.10 
   0 -11   4    0.71    0.18 
  -1  11  -4    5.27    0.29 
   1 -11   4    5.05    0.43 
  -2  11  -4    7.96    0.40 
  -3  11  -4    0.34    0.10 
  -4  11  -4    0.69    0.13 
  -4  11  -4    0.88    0.19 
   5  10  -4    0.01    0.07 
  -5 -10   4   -0.02    0.12 
   4  10  -4    2.44    0.20 
  -4 -10   4    2.28    0.28 
  -4 -10   4    2.76    0.32 
   3  10  -4    2.02    0.18 
  -3 -10   4    1.98    0.26 
  -3 -10   4    2.23    0.27 
   2  10  -4    7.68    0.37 
  -2 -10   4    7.77    0.50 
   1  10  -4    0.49    0.09 
  -1 -10   4    0.19    0.12 
   0  10  -4    9.27    0.42 
   0 -10   4    9.67    0.55 
  -1  10  -4    7.90    0.38 
   1 -10   4    7.93    0.48 
  -2  10  -4    0.15    0.07 
   2 -10   4    0.04    0.08 
  -3  10  -4    2.27    0.26 
  -3  10  -4    2.36    0.20 
  -4  10  -4    1.57    0.18 
  -4  10  -4    1.55    0.24 
  -5  10  -4   -0.02    0.09 
  -5  10  -4    0.43    0.11 
   6   9  -4    0.01    0.07 
  -6  -9   4    0.06    0.12 
   5   9  -4    6.01    0.32 
  -5  -9   4    5.45    0.42 
  -5  -9   4    4.80    0.42 
   4   9  -4   12.96    0.56 
  -4  -9   4   12.19    0.68 
  -4  -9   4   12.36    0.68 
   3   9  -4    0.14    0.07 
  -3  -9   4    0.07    0.11 
   2   9  -4    1.18    0.14 
  -2  -9   4    1.67    0.23 
   1   9  -4    0.73    0.11 
  -1  -9   4    0.72    0.16 
   0   9  -4    3.70    0.22 
   0  -9   4    4.15    0.32 
  -1   9  -4    4.47    0.25 
   1  -9   4    4.83    0.34 
  -2   9  -4   10.31    0.45 
   2  -9   4    9.06    0.52 
  -3   9  -4    0.17    0.12 
  -3   9  -4    0.17    0.08 
  -4   9  -4    7.84    0.40 
  -4   9  -4    7.57    0.46 
  -5   9  -4    5.27    0.32 
  -5   9  -4    5.10    0.37 
  -6   9  -4    1.17    0.22 
  -6   9  -4    1.20    0.19 
  -7   9  -4    0.30    0.12 
  -7   9  -4    0.43    0.14 
   7   8  -4    0.62    0.13 
  -7  -8   4    0.45    0.17 
   6   8  -4    3.35    0.24 
  -6  -8   4    2.88    0.33 
  -6  -8   4    3.06    0.33 
   5   8  -4    1.62    0.17 
  -5  -8   4    1.63    0.23 
  -5  -8   4    1.31    0.23 
   4   8  -4    0.14    0.07 
  -4  -8   4    0.11    0.11 
  -4  -8   4    0.14    0.10 
   3   8  -4    0.83    0.12 
  -3  -8   4    0.78    0.17 
   2   8  -4    0.00    0.05 
  -2  -8   4    0.03    0.08 
   1   8  -4    1.11    0.12 
  -1  -8   4    1.23    0.18 
   0   8  -4   21.66    0.83 
   0  -8   4   20.89    0.93 
  -1   8  -4    0.05    0.05 
   1  -8   4   -0.01    0.07 
  -2   8  -4    0.10    0.09 
  -2   8  -4    0.19    0.06 
  -3   8  -4    1.24    0.14 
  -3   8  -4    1.45    0.18 
  -4   8  -4    0.19    0.08 
  -4   8  -4    0.25    0.11 
  -5   8  -4   -0.03    0.08 
  -5   8  -4    0.08    0.10 
  -5   8  -4    0.04    0.07 
  -6   8  -4    7.03    0.40 
  -6   8  -4    7.20    0.44 
  -6   8  -4    7.35    0.43 
  -7   8  -4    3.46    0.28 
  -7   8  -4    3.12    0.28 
  -7   8  -4    3.77    0.32 
  -8   8  -4    0.14    0.11 
  -8   8  -4    0.12    0.12 
   8   7  -4    7.67    0.44 
   8   7  -4    7.09    0.42 
  -8  -7   4    7.46    0.53 
   7   7  -4    0.03    0.08 
   7   7  -4   -0.01    0.07 
  -7  -7   4   -0.06    0.14 
  -7  -7   4    0.13    0.13 
   6   7  -4    0.45    0.11 
  -6  -7   4    0.31    0.15 
  -6  -7   4    0.36    0.14 
   5   7  -4    7.10    0.36 
  -5  -7   4    5.98    0.42 
  -5  -7   4    7.83    0.48 
   4   7  -4    3.91    0.24 
  -4  -7   4    3.57    0.32 
  -4  -7   4    3.72    0.30 
   3   7  -4    2.84    0.19 
  -3  -7   4    2.46    0.26 
   2   7  -4   15.24    0.61 
  -2  -7   4   14.67    0.70 
   1   7  -4   24.11    0.91 
  -1  -7   4   23.00    1.00 
   0   7  -4    2.09    0.14 
   0  -7   4    1.73    0.19 
  -1   7  -4    3.47    0.26 
  -1   7  -4    3.32    0.19 
   1  -7   4    3.59    0.25 
  -2   7  -4    1.30    0.12 
  -2   7  -4    1.27    0.17 
  -3   7  -4    0.12    0.08 
  -3   7  -4    0.05    0.05 
  -4   7  -4   12.93    0.63 
  -4   7  -4   14.15    0.59 
  -5   7  -4   13.07    0.57 
  -5   7  -4   12.23    0.59 
  -5   7  -4   12.32    0.60 
  -6   7  -4    4.07    0.29 
  -6   7  -4    3.94    0.28 
  -6   7  -4    4.26    0.31 
  -7   7  -4    2.02    0.21 
  -7   7  -4    1.94    0.23 
  -7   7  -4    1.64    0.21 
  -8   7  -4    6.08    0.40 
  -8   7  -4    6.13    0.41 
  -8   7  -4    6.50    0.42 
   9   6  -4    0.19    0.12 
   9   6  -4    0.22    0.11 
  -9  -6   4    0.23    0.17 
   8   6  -4    0.00    0.08 
   8   6  -4    0.14    0.09 
  -8  -6   4    0.01    0.12 
  -8  -6   4   -0.07    0.13 
   7   6  -4   12.20    0.57 
   7   6  -4   11.53    0.56 
  -7  -6   4   11.64    0.65 
  -7  -6   4   11.19    0.67 
   6   6  -4   15.63    0.66 
   6   6  -4   14.26    0.65 
  -6  -6   4   15.15    0.77 
  -6  -6   4   14.51    0.74 
   5   6  -4    3.35    0.22 
  -5  -6   4    2.83    0.27 
  -5  -6   4    3.10    0.30 
   4   6  -4   10.97    0.48 
   4   6  -4   10.80    0.47 
  -4  -6   4   10.45    0.57 
  -4  -6   4   10.71    0.56 
   3   6  -4   21.74    0.85 
   3   6  -4   22.01    0.86 
  -3  -6   4   21.52    0.94 
   2   6  -4   12.04    0.50 
  -2  -6   4   12.25    0.59 
   1   6  -4    8.74    0.39 
  -1  -6   4    9.39    0.46 
   0   6  -4   25.89    0.97 
   0  -6   4   24.97    1.04 
  -1   6  -4    4.79    0.24 
  -1   6  -4    4.74    0.29 
   1  -6   4    4.70    0.29 
  -2   6  -4   23.25    0.90 
  -2   6  -4   23.51    0.95 
  -3   6  -4   44.04    1.64 
  -3   6  -4   44.67    1.70 
  -4   6  -4    5.47    0.33 
  -4   6  -4    5.61    0.31 
  -4   6  -4    5.38    0.29 
  -5   6  -4    0.38    0.12 
  -5   6  -4    0.22    0.09 
  -5   6  -4    0.31    0.09 
  -6   6  -4   11.56    0.56 
  -6   6  -4   11.76    0.58 
  -6   6  -4   11.98    0.55 
  -7   6  -4    1.22    0.17 
  -7   6  -4    1.03    0.17 
  -7   6  -4    0.90    0.17 
  -8   6  -4    2.63    0.27 
  -8   6  -4    1.97    0.24 
  -8   6  -4    2.35    0.24 
  -9   6  -4    1.18    0.22 
  -9   6  -4    0.65    0.16 
   9   5  -4    1.14    0.18 
   9   5  -4    1.29    0.20 
  -9  -5   4    0.99    0.22 
   8   5  -4    4.31    0.32 
   8   5  -4    4.36    0.31 
  -8  -5   4    4.60    0.41 
  -8  -5   4    4.97    0.39 
   7   5  -4   19.99    0.83 
   7   5  -4   20.82    0.85 
  -7  -5   4   18.94    0.91 
  -7  -5   4   17.86    0.93 
   6   5  -4    1.73    0.17 
   6   5  -4    1.78    0.18 
  -6  -5   4    1.38    0.24 
  -6  -5   4    1.41    0.21 
   5   5  -4    0.32    0.09 
   5   5  -4    0.40    0.09 
  -5  -5   4    0.25    0.11 
  -5  -5   4    0.35    0.13 
   4   5  -4    2.99    0.20 
   4   5  -4    3.17    0.20 
  -4  -5   4    3.26    0.26 
  -4  -5   4    3.78    0.28 
   3   5  -4   27.54    1.11 
   3   5  -4   31.22    1.11 
  -3  -5   4   29.86    1.20 
   2   5  -4   86.88    3.02 
   2   5  -4   86.65    3.04 
  -2  -5   4   80.41    3.11 
   1   5  -4   19.00    0.69 
   1   5  -4   18.84    0.73 
  -1  -5   4   18.31    0.79 
   0   5  -4   14.17    0.57 
   0  -5   4   14.32    0.62 
  -1   5  -4   23.10    0.91 
  -1   5  -4   21.81    0.85 
  -2   5  -4   16.17    0.64 
  -2   5  -4   16.12    0.68 
  -3   5  -4   23.90    0.98 
  -3   5  -4   25.74    0.95 
  -4   5  -4    0.83    0.11 
  -4   5  -4    0.79    0.14 
  -4   5  -4    0.77    0.12 
  -5   5  -4    0.53    0.10 
  -5   5  -4    0.31    0.10 
  -5   5  -4    0.40    0.09 
  -6   5  -4    0.04    0.08 
  -6   5  -4    0.08    0.07 
  -6   5  -4    0.04    0.07 
  -7   5  -4    0.02    0.07 
  -7   5  -4   -0.04    0.08 
  -7   5  -4    0.01    0.07 
  -8   5  -4    7.10    0.40 
  -8   5  -4    6.51    0.39 
  -8   5  -4    5.96    0.40 
  -9   5  -4   10.15    0.55 
  -9   5  -4   10.01    0.54 
  -9   5  -4    9.73    0.53 
 -10   5  -4   -0.08    0.11 
   9   4  -4    3.74    0.29 
   9   4  -4    3.75    0.31 
  -9  -4   4    3.63    0.36 
  -9  -4   4    2.88    0.37 
   8   4  -4    6.28    0.39 
   8   4  -4    6.42    0.37 
  -8  -4   4    6.04    0.43 
  -8  -4   4    6.15    0.46 
   7   4  -4    0.28    0.09 
   7   4  -4    0.50    0.12 
  -7  -4   4    0.42    0.14 
  -7  -4   4    0.19    0.14 
   6   4  -4   11.16    0.51 
   6   4  -4   11.01    0.53 
  -6  -4   4   11.13    0.57 
  -6  -4   4   11.06    0.61 
   5   4  -4   17.96    0.71 
   5   4  -4   17.45    0.70 
  -5  -4   4   15.37    0.71 
  -5  -4   4   16.41    0.78 
  -5  -4   4   16.62    0.76 
   4   4  -4   17.61    0.69 
  -4  -4   4   16.30    0.73 
  -4  -4   4   17.22    0.76 
  -4  -4   4   16.02    0.65 
   3   4  -4   81.70    2.87 
   3   4  -4   82.65    2.88 
  -3  -4   4   79.14    2.95 
  -3  -4   4   76.13    2.84 
   2   4  -4   18.15    0.66 
   2   4  -4   17.23    0.67 
  -2  -4   4   15.34    0.71 
   1   4  -4    2.52    0.12 
   1   4  -4    2.20    0.14 
  -1  -4   4    2.11    0.17 
   0   4  -4    2.17    0.17 
   0   4  -4    2.33    0.14 
   0   4  -4    2.35    0.10 
   0  -4   4    2.56    0.18 
  -1   4  -4    3.13    0.17 
  -1   4  -4    3.23    0.20 
  -2   4  -4   33.77    1.22 
  -2   4  -4   32.40    1.26 
  -3   4  -4   10.05    0.45 
  -3   4  -4   10.19    0.46 
  -3   4  -4   10.16    0.43 
  -4   4  -4   48.99    1.77 
  -4   4  -4   47.60    1.75 
  -4   4  -4   44.03    1.73 
  -5   4  -4    0.03    0.07 
  -5   4  -4    0.02    0.05 
  -5   4  -4    0.01    0.05 
  -6   4  -4   15.18    0.65 
  -6   4  -4   14.63    0.64 
  -6   4  -4   14.45    0.66 
  -7   4  -4    4.39    0.30 
  -7   4  -4    4.59    0.30 
  -7   4  -4    4.46    0.19 
  -7   4  -4    4.58    0.29 
  -8   4  -4   12.00    0.59 
  -8   4  -4   10.55    0.56 
  -8   4  -4   12.20    0.58 
  -8   4  -4   12.35    0.46 
  -9   4  -4    1.07    0.26 
  -9   4  -4    1.50    0.19 
  -9   4  -4    1.09    0.09 
  -9   4  -4    1.33    0.22 
 -10   4  -4    0.17    0.11 
 -10   4  -4    0.26    0.13 
  10   3  -4    1.71    0.25 
 -10  -3   4    1.26    0.26 
 -10  -3   4    1.62    0.21 
   9   3  -4    2.39    0.25 
   9   3  -4    2.47    0.24 
  -9  -3   4    2.17    0.22 
  -9  -3   4    1.96    0.28 
  -9  -3   4    2.30    0.35 
   8   3  -4   11.10    0.59 
   8   3  -4   12.20    0.58 
  -8  -3   4   11.51    0.63 
  -8  -3   4   12.54    0.55 
  -8  -3   4   12.98    0.69 
   7   3  -4    0.13    0.08 
   7   3  -4    0.08    0.07 
  -7  -3   4    0.08    0.13 
  -7  -3   4    0.05    0.06 
  -7  -3   4   -0.10    0.08 
   6   3  -4    9.56    0.47 
   6   3  -4   10.02    0.49 
  -6  -3   4   10.56    0.56 
  -6  -3   4    9.47    0.51 
  -6  -3   4   10.65    0.45 
   5   3  -4    3.92    0.25 
   5   3  -4    4.17    0.24 
  -5  -3   4    4.39    0.32 
  -5  -3   4    4.07    0.22 
  -5  -3   4    4.05    0.28 
   4   3  -4    0.29    0.07 
   4   3  -4    0.48    0.09 
  -4  -3   4    0.36    0.10 
  -4  -3   4    0.42    0.09 
  -4  -3   4    0.36    0.06 
   3   3  -4    4.60    0.23 
   3   3  -4    4.20    0.23 
  -3  -3   4    4.39    0.25 
  -3  -3   4    4.49    0.21 
  -3  -3   4    4.25    0.27 
   2   3  -4    0.96    0.09 
   2   3  -4    0.84    0.09 
  -2  -3   4    0.88    0.11 
   1   3  -4    1.21    0.10 
   1   3  -4    1.23    0.09 
  -1  -3   4    1.37    0.12 
   0   3  -4   45.18    1.65 
   0   3  -4   45.50    1.69 
   0   3  -4   46.23    1.61 
   0  -3   4   45.46    1.69 
  -1   3  -4   20.26    0.77 
  -1   3  -4   20.22    0.80 
  -2   3  -4   73.38    2.63 
  -2   3  -4   73.82    2.67 
  -3   3  -4   22.56    0.90 
  -3   3  -4   22.86    0.88 
  -3   3  -4   23.78    0.87 
  -3   3  -4   21.81    0.82 
   3  -3   4   23.69    0.81 
  -4   3  -4    5.87    0.30 
  -4   3  -4    6.52    0.30 
  -4   3  -4    5.70    0.24 
   4  -3   4    6.31    0.25 
  -5   3  -4   36.09    1.29 
  -5   3  -4   36.25    1.36 
  -5   3  -4   34.94    1.38 
  -5   3  -4   35.64    1.37 
   5  -3   4   36.91    1.31 
  -6   3  -4    8.48    0.34 
  -6   3  -4    8.46    0.42 
  -6   3  -4    8.88    0.41 
  -6   3  -4    8.27    0.43 
   6  -3   4    8.20    0.37 
  -7   3  -4    4.61    0.29 
  -7   3  -4    4.20    0.21 
  -7   3  -4    4.26    0.28 
  -7   3  -4    4.51    0.31 
   7  -3   4    4.68    0.25 
  -8   3  -4    2.67    0.25 
  -8   3  -4    2.50    0.22 
  -8   3  -4    2.75    0.16 
  -8   3  -4    2.46    0.22 
  -9   3  -4    0.59    0.14 
  -9   3  -4    0.71    0.16 
  -9   3  -4    0.53    0.08 
 -10   3  -4    0.52    0.16 
 -10   3  -4    0.35    0.12 
 -10   3  -4    0.26    0.07 
 -11   3  -4    3.25    0.32 
 -11   3  -4    2.70    0.18 
  10   2  -4    7.59    0.47 
 -10  -2   4    7.83    0.43 
 -10  -2   4    7.46    0.53 
   9   2  -4    7.35    0.45 
  -9  -2   4    7.68    0.55 
  -9  -2   4    7.13    0.40 
  -9  -2   4    7.20    0.47 
   8   2  -4   16.02    0.71 
   8   2  -4   13.74    0.71 
  -8  -2   4   16.41    0.76 
  -8  -2   4   15.89    0.67 
  -8  -2   4   16.61    0.82 
   7   2  -4    2.11    0.21 
  -7  -2   4    2.35    0.24 
  -7  -2   4    2.53    0.19 
  -7  -2   4    2.36    0.28 
   6   2  -4    0.64    0.12 
   6   2  -4    0.56    0.10 
  -6  -2   4    0.48    0.09 
  -6  -2   4    0.27    0.14 
  -6  -2   4    0.54    0.12 
   5   2  -4    8.09    0.39 
   5   2  -4    7.30    0.37 
  -5  -2   4    7.77    0.35 
  -5  -2   4    7.58    0.43 
  -5  -2   4    7.97    0.40 
   4   2  -4   24.55    0.94 
   4   2  -4   23.56    0.92 
  -4  -2   4   22.52    0.98 
  -4  -2   4   23.84    0.90 
  -4  -2   4   24.81    0.96 
   3   2  -4    9.61    0.43 
   3   2  -4   10.15    0.44 
  -3  -2   4   10.50    0.49 
  -3  -2   4   11.06    0.42 
  -3  -2   4   10.70    0.47 
   2   2  -4   25.69    0.94 
   2   2  -4   23.98    0.94 
  -2  -2   4   25.48    0.93 
  -2  -2   4   25.51    0.99 
   1   2  -4   30.35    1.13 
   1   2  -4   30.77    1.11 
  -1  -2   4   30.62    1.16 
   0   2  -4  611.22   21.58 
   0   2  -4  611.91   21.61 
   0   2  -4  626.37   21.74 
   0  -2   4  607.28   21.76 
  -1   2  -4   72.65    2.60 
  -1   2  -4   73.05    2.57 
  -1   2  -4   72.74    2.62 
  -2   2  -4   18.42    0.66 
  -2   2  -4   17.88    0.69 
  -2   2  -4   17.62    0.71 
  -2   2  -4   18.18    0.69 
  -3   2  -4    6.17    0.28 
  -3   2  -4    6.25    0.25 
  -3   2  -4    6.03    0.28 
  -3   2  -4    5.85    0.30 
   3  -2   4    6.47    0.24 
  -4   2  -4   11.18    0.42 
  -4   2  -4   10.59    0.46 
  -4   2  -4   11.30    0.46 
  -4   2  -4   10.31    0.47 
   4  -2   4   11.13    0.46 
   4  -2   4   10.21    0.41 
  -5   2  -4   10.86    0.51 
  -5   2  -4   10.89    0.49 
  -5   2  -4   11.22    0.48 
  -5   2  -4   11.27    0.44 
   5  -2   4   11.68    0.45 
  -6   2  -4   49.23    1.86 
  -6   2  -4   50.14    1.84 
  -6   2  -4   48.60    1.84 
  -6   2  -4   49.31    1.77 
   6  -2   4   49.35    1.80 
  -7   2  -4   64.88    2.37 
  -7   2  -4   63.36    2.28 
  -7   2  -4   62.41    2.38 
   7  -2   4   63.63    2.32 
  -8   2  -4    5.38    0.31 
  -8   2  -4    4.12    0.22 
  -8   2  -4    4.16    0.30 
  -8   2  -4    4.30    0.31 
   8  -2   4    4.66    0.27 
  -9   2  -4    0.13    0.06 
  -9   2  -4    0.40    0.14 
  -9   2  -4    0.24    0.10 
   9  -2   4    0.15    0.08 
 -10   2  -4    1.95    0.24 
 -10   2  -4    2.19    0.24 
 -10   2  -4    1.66    0.15 
  10  -2   4    1.32    0.18 
 -11   2  -4    2.81    0.31 
 -11   2  -4    2.05    0.18 
  10   1  -4    5.73    0.40 
 -10  -1   4    5.39    0.34 
   9   1  -4   13.64    0.67 
  -9  -1   4   12.92    0.68 
  -9  -1   4   13.23    0.59 
  -9  -1   4   12.44    0.73 
   8   1  -4   15.19    0.73 
  -8  -1   4   17.06    0.75 
  -8  -1   4   14.77    0.79 
  -8  -1   4   15.11    0.66 
   7   1  -4    7.64    0.42 
   7   1  -4    7.41    0.39 
  -7  -1   4    7.09    0.41 
  -7  -1   4    6.84    0.36 
  -7  -1   4    8.14    0.49 
   6   1  -4    1.57    0.16 
   6   1  -4    1.52    0.18 
  -6  -1   4    1.57    0.18 
  -6  -1   4    1.49    0.14 
  -6  -1   4    1.29    0.22 
   5   1  -4   66.87    2.40 
   5   1  -4   62.81    2.38 
  -5  -1   4   66.23    2.35 
  -5  -1   4   62.47    2.40 
  -5  -1   4   67.49    2.45 
   4   1  -4   24.42    0.95 
   4   1  -4   24.70    0.97 
  -4  -1   4   23.28    0.97 
  -4  -1   4   26.06    0.94 
  -4  -1   4   26.20    1.02 
  -4  -1   4   24.47    0.95 
   3   1  -4    1.69    0.13 
   3   1  -4    1.20    0.11 
  -3  -1   4    1.18    0.10 
  -3  -1   4    1.21    0.14 
  -3  -1   4    1.23    0.10 
  -3  -1   4    1.24    0.12 
   2   1  -4   93.52    3.33 
  -2  -1   4   95.62    3.32 
  -2  -1   4   89.59    3.31 
  -2  -1   4   94.89    3.36 
   1   1  -4  275.72   10.10 
   1   1  -4  295.47   10.13 
   1   1  -4  284.76   10.07 
  -1  -1   4  303.53   10.09 
  -1  -1   4  284.32   10.11 
  -1  -1   4  276.75   10.09 
   0   1  -4  125.68    4.46 
   0   1  -4  126.75    4.44 
   0   1  -4  119.48    4.42 
   0   1  -4  129.26    4.42 
   0  -1   4  127.91    4.46 
  -1   1  -4   19.62    0.69 
  -1   1  -4   18.91    0.72 
  -1   1  -4   19.08    0.70 
  -1   1  -4   18.89    0.73 
   1  -1   4   19.69    0.74 
  -2   1  -4    7.59    0.29 
  -2   1  -4    7.58    0.31 
  -2   1  -4    7.48    0.33 
  -2   1  -4    7.29    0.31 
   2  -1   4    7.55    0.32 
  -3   1  -4    6.71    0.29 
  -3   1  -4    6.72    0.29 
  -3   1  -4    6.92    0.31 
  -3   1  -4    6.42    0.27 
   3  -1   4    6.61    0.30 
   3  -1   4    6.48    0.26 
  -4   1  -4   48.96    1.80 
  -4   1  -4   49.34    1.82 
  -4   1  -4   50.29    1.76 
   4  -1   4   49.16    1.80 
   4  -1   4   48.60    1.77 
  -5   1  -4  122.28    4.48 
  -5   1  -4  127.15    4.44 
  -5   1  -4  124.60    4.51 
  -5   1  -4  127.13    4.48 
   5  -1   4  126.00    4.49 
   5  -1   4  127.21    4.46 
  -6   1  -4   58.83    2.10 
  -6   1  -4   57.53    2.05 
  -6   1  -4   58.36    2.11 
  -6   1  -4   56.97    2.13 
   6  -1   4   54.72    2.10 
   6  -1   4   56.05    2.08 
  -7   1  -4    0.04    0.05 
  -7   1  -4    0.05    0.06 
  -7   1  -4    0.08    0.07 
  -7   1  -4   -0.01    0.09 
   7  -1   4    0.04    0.05 
  -8   1  -4    6.88    0.32 
  -8   1  -4    7.48    0.42 
  -8   1  -4    7.09    0.39 
   8  -1   4    6.38    0.35 
  -9   1  -4    3.74    0.22 
  -9   1  -4    4.10    0.33 
  -9   1  -4    3.96    0.29 
   9  -1   4    3.71    0.26 
 -10   1  -4    3.98    0.24 
 -10   1  -4    3.99    0.32 
 -10   1  -4    4.08    0.35 
  10  -1   4    3.40    0.27 
 -11   1  -4    1.80    0.28 
 -11   1  -4    0.98    0.16 
 -11   1  -4    1.76    0.25 
  11  -1   4    1.34    0.19 
  10   0  -4    6.53    0.44 
 -10   0   4    5.57    0.56 
 -10   0   4    6.49    0.37 
   9   0  -4   11.78    0.63 
  -9   0   4   13.73    0.73 
  -9   0   4   13.10    0.57 
  -9   0   4   11.65    0.70 
   8   0  -4    0.46    0.13 
  -8   0   4    0.33    0.16 
  -8   0   4    0.35    0.09 
  -8   0   4    0.47    0.23 
   7   0  -4    1.06    0.15 
   7   0  -4    1.49    0.18 
  -7   0   4    1.52    0.23 
  -7   0   4    1.41    0.15 
   6   0  -4   71.17    2.64 
   6   0  -4   72.83    2.67 
  -6   0   4   74.22    2.72 
  -6   0   4   70.59    2.61 
   5   0  -4   17.31    0.74 
   5   0  -4   17.28    0.72 
  -5   0   4   18.54    0.70 
  -5   0   4   17.69    0.78 
  -5   0   4   17.85    0.72 
   4   0  -4   25.79    1.06 
   4   0  -4   26.93    1.04 
  -4   0   4   28.50    1.02 
  -4   0   4   28.02    1.06 
  -4   0   4   27.07    1.09 
  -4   0   4   28.34    1.04 
   3   0  -4    3.69    0.21 
  -3   0   4    3.67    0.20 
  -3   0   4    3.88    0.24 
  -3   0   4    3.82    0.20 
  -3   0   4    3.97    0.19 
   2   0  -4    0.04    0.03 
   2   0  -4    0.08    0.03 
   2   0  -4    0.04    0.04 
  -2   0   4    0.07    0.03 
  -2   0   4    0.10    0.05 
   1   0  -4   31.27    1.10 
   1   0  -4   29.90    1.12 
  -1   0   4   32.01    1.13 
  -1   0   4   28.95    1.10 
  -1   0   4   30.51    1.12 
   0   0  -4   16.80    0.59 
   0   0  -4   15.14    0.59 
   0   0  -4   15.78    0.60 
   0   0  -4   17.11    0.60 
   0   0   4   14.08    0.60 
   0   0   4   16.75    0.60 
  -1   0  -4  157.94    5.82 
  -1   0  -4  168.90    5.84 
  -1   0  -4  165.66    5.81 
  -1   0  -4  168.24    5.83 
   1   0   4  167.49    5.83 
  -2   0  -4    0.88    0.07 
  -2   0  -4    0.97    0.07 
  -2   0  -4    1.02    0.07 
  -2   0  -4    1.03    0.09 
   2   0   4    1.06    0.08 
  -3   0  -4  120.11    4.18 
  -3   0  -4  117.43    4.20 
  -3   0  -4  115.36    4.22 
  -3   0  -4  118.77    4.20 
   3   0   4  121.83    4.18 
   3   0   4  118.39    4.21 
  -4   0  -4    1.97    0.15 
  -4   0  -4    2.03    0.13 
  -4   0  -4    1.94    0.12 
  -4   0  -4    1.94    0.13 
   4   0   4    2.02    0.14 
   4   0   4    2.24    0.12 
  -5   0  -4    9.33    0.41 
  -5   0  -4    9.52    0.41 
  -5   0  -4    9.56    0.38 
  -5   0  -4    9.18    0.44 
   5   0   4    9.30    0.41 
   5   0   4    9.41    0.39 
  -6   0  -4    4.67    0.26 
  -6   0  -4    4.47    0.24 
  -6   0  -4    4.35    0.22 
  -6   0  -4    4.36    0.28 
   6   0   4    3.99    0.23 
  -7   0  -4    1.01    0.17 
  -7   0  -4    1.16    0.14 
  -7   0  -4    1.07    0.15 
  -7   0  -4    1.06    0.12 
   7   0   4    1.14    0.14 
   7   0   4    0.89    0.12 
  -8   0  -4    0.02    0.08 
  -8   0  -4    0.00    0.06 
  -8   0  -4   -0.08    0.09 
   8   0   4    0.06    0.06 
  -9   0  -4    8.31    0.45 
  -9   0  -4    7.38    0.36 
  -9   0  -4    7.22    0.46 
   9   0   4    7.72    0.40 
 -10   0  -4   17.81    0.86 
 -10   0  -4   18.26    0.74 
 -10   0  -4   18.62    0.83 
  10   0   4   17.90    0.79 
 -11   0  -4    2.74    0.28 
 -11   0  -4    2.56    0.30 
 -11   0  -4    2.86    0.22 
  11   0   4    2.98    0.26 
  10  -1  -4    1.62    0.25 
 -10   1   4    1.02    0.25 
 -10   1   4    0.69    0.13 
   9  -1  -4    3.36    0.30 
  -9   1   4    3.84    0.26 
  -9   1   4    3.75    0.38 
   8  -1  -4    6.01    0.39 
  -8   1   4    5.81    0.42 
  -8   1   4    6.06    0.52 
  -8   1   4    6.36    0.33 
   7  -1  -4    4.37    0.29 
  -7   1   4    3.87    0.28 
  -7   1   4    4.06    0.34 
  -7   1   4    3.67    0.23 
   6  -1  -4    1.69    0.18 
   6  -1  -4    1.52    0.15 
  -6   1   4    1.78    0.15 
  -6   1   4    1.29    0.20 
  -6   1   4    1.61    0.17 
  -6   1   4    1.41    0.15 
  -6   1   4    1.35    0.14 
   5  -1  -4   10.32    0.47 
   5  -1  -4   11.45    0.50 
  -5   1   4   11.68    0.54 
  -5   1   4   10.51    0.45 
  -5   1   4   10.79    0.48 
  -5   1   4   10.90    0.48 
  -5   1   4   10.29    0.47 
   4  -1  -4   19.31    0.78 
   4  -1  -4   20.34    0.80 
  -4   1   4   19.66    0.76 
  -4   1   4   20.91    0.84 
  -4   1   4   20.79    0.79 
  -4   1   4   19.42    0.78 
   3  -1  -4   10.35    0.46 
  -3   1   4   10.93    0.46 
  -3   1   4   11.41    0.49 
  -3   1   4   11.62    0.46 
  -3   1   4   11.18    0.44 
   2  -1  -4    1.46    0.10 
   2  -1  -4    1.49    0.09 
   2  -1  -4    1.58    0.11 
  -2   1   4    1.58    0.12 
  -2   1   4    1.46    0.10 
  -2   1   4    1.49    0.09 
  -2   1   4    1.51    0.09 
   1  -1  -4   25.95    0.91 
   1  -1  -4   25.17    0.90 
   1  -1  -4   25.54    0.89 
  -1   1   4   24.56    0.89 
  -1   1   4   24.27    0.91 
  -1   1   4   21.11    0.90 
   0  -1  -4   45.92    1.58 
   0  -1  -4   44.03    1.60 
   0  -1  -4   43.49    1.59 
   0  -1  -4   42.76    1.60 
   0   1   4   43.78    1.60 
   0   1   4   42.58    1.59 
   0   1   4   48.59    1.59 
  -1  -1  -4   25.12    0.92 
  -1  -1  -4   24.70    0.91 
  -1  -1  -4   24.90    0.90 
  -1  -1  -4   24.62    0.90 
   1   1   4   26.59    0.91 
   1   1   4   24.67    0.90 
  -2  -1  -4    0.41    0.07 
  -2  -1  -4    0.27    0.04 
  -2  -1  -4    0.28    0.04 
  -2  -1  -4    0.16    0.03 
   2   1   4    0.28    0.05 
  -3  -1  -4    6.51    0.27 
  -3  -1  -4    6.58    0.28 
  -3  -1  -4    6.37    0.26 
  -3  -1  -4    6.28    0.29 
   3   1   4    6.26    0.28 
   3   1   4    6.28    0.26 
  -4  -1  -4   19.69    0.75 
  -4  -1  -4   19.13    0.75 
  -4  -1  -4   19.64    0.74 
  -4  -1  -4   20.60    0.79 
   4   1   4   20.27    0.77 
   4   1   4   19.42    0.74 
  -5  -1  -4   18.55    0.77 
  -5  -1  -4   18.60    0.74 
  -5  -1  -4   18.64    0.73 
  -5  -1  -4   18.68    0.70 
   5   1   4   18.25    0.72 
   5   1   4   18.64    0.73 
  -6  -1  -4    6.53    0.33 
  -6  -1  -4    6.55    0.31 
   6   1   4    6.18    0.32 
   6   1   4    6.42    0.31 
  -7  -1  -4    0.70    0.12 
  -7  -1  -4    0.66    0.14 
  -7  -1  -4    0.91    0.11 
   7   1   4    0.96    0.12 
   7   1   4    0.79    0.12 
  -8  -1  -4   19.64    0.84 
  -8  -1  -4   19.34    0.77 
  -8  -1  -4   18.31    0.86 
   8   1   4   19.69    0.81 
   8   1   4   21.00    0.83 
  -9  -1  -4   18.38    0.73 
  -9  -1  -4   16.86    0.82 
  -9  -1  -4   18.08    0.80 
   9   1   4   17.83    0.77 
 -10  -1  -4    6.36    0.34 
 -10  -1  -4    7.15    0.43 
 -10  -1  -4    5.94    0.43 
  10   1   4    6.34    0.38 
 -11  -1  -4    0.47    0.15 
 -11  -1  -4    0.36    0.11 
 -11  -1  -4    0.32    0.18 
  11   1   4    0.56    0.14 
 -12  -1  -4    0.68    0.14 
 -12  -1  -4    0.74    0.22 
  12   1   4    0.68    0.16 
  10  -2  -4    5.91    0.42 
 -10   2   4    6.07    0.34 
 -10   2   4    6.28    0.54 
   9  -2  -4    8.47    0.51 
  -9   2   4    9.17    0.43 
  -9   2   4    8.86    0.54 
   8  -2  -4    0.34    0.11 
  -8   2   4    0.33    0.09 
  -8   2   4    0.42    0.16 
   7  -2  -4   14.23    0.68 
  -7   2   4   14.18    0.71 
  -7   2   4   14.64    0.61 
  -7   2   4   16.26    0.67 
   6  -2  -4   22.26    0.92 
  -6   2   4   22.57    0.85 
  -6   2   4   20.13    0.88 
  -6   2   4   22.17    0.95 
  -6   2   4   23.13    0.90 
   5  -2  -4   26.50    1.04 
   5  -2  -4   25.73    1.07 
  -5   2   4   26.41    1.01 
  -5   2   4   27.83    1.05 
  -5   2   4   27.84    1.10 
  -5   2   4   28.26    1.05 
   4  -2  -4    0.89    0.11 
   4  -2  -4    0.84    0.09 
  -4   2   4    0.91    0.14 
  -4   2   4    0.66    0.08 
  -4   2   4    0.90    0.10 
   3  -2  -4  121.15    4.36 
   3  -2  -4  124.36    4.32 
   3  -2  -4  122.83    4.34 
  -3   2   4  123.43    4.32 
  -3   2   4  114.51    4.34 
  -3   2   4  124.90    4.33 
  -3   2   4  125.84    4.35 
  -3   2   4  121.43    4.37 
   2  -2  -4    6.44    0.24 
   2  -2  -4    5.50    0.25 
   2  -2  -4    4.94    0.26 
  -2   2   4    6.39    0.24 
  -2   2   4    5.25    0.25 
  -2   2   4    5.64    0.24 
   1  -2  -4    6.53    0.27 
   1  -2  -4    6.67    0.28 
  -1   2   4    6.80    0.26 
  -1   2   4    6.98    0.29 
  -1   2   4    6.51    0.28 
   0  -2  -4    0.02    0.02 
   0  -2  -4    0.02    0.02 
   0  -2  -4    0.01    0.02 
   0  -2  -4    0.03    0.03 
   0   2   4    0.07    0.03 
   0   2   4    0.00    0.02 
   0   2   4    0.03    0.02 
  -1  -2  -4   14.30    0.55 
  -1  -2  -4   14.05    0.54 
  -1  -2  -4   15.19    0.55 
   1   2   4   15.12    0.53 
   1   2   4   14.90    0.54 
   1   2   4   14.90    0.53 
   1   2   4   15.41    0.56 
  -2  -2  -4  233.08    8.09 
  -2  -2  -4  233.00    8.09 
  -2  -2  -4  226.79    8.07 
   2   2   4  220.63    8.04 
   2   2   4  230.83    8.07 
  -3  -2  -4   17.44    0.66 
  -3  -2  -4   18.11    0.70 
  -3  -2  -4   17.20    0.66 
   3   2   4   18.10    0.67 
   3   2   4   18.28    0.68 
  -4  -2  -4   50.32    1.85 
  -4  -2  -4   53.47    1.91 
  -4  -2  -4   52.01    1.87 
  -4  -2  -4   51.67    1.87 
   4   2   4   51.35    1.87 
   4   2   4   51.91    1.88 
  -5  -2  -4    1.40    0.17 
  -5  -2  -4    1.74    0.12 
  -5  -2  -4    1.53    0.13 
  -5  -2  -4    1.58    0.11 
   5   2   4    1.67    0.13 
   5   2   4    1.63    0.12 
  -6  -2  -4   18.70    0.73 
  -6  -2  -4   18.74    0.75 
  -6  -2  -4   18.21    0.77 
  -6  -2  -4   19.21    0.81 
   6   2   4   19.74    0.76 
   6   2   4   18.78    0.75 
  -7  -2  -4    5.27    0.32 
  -7  -2  -4    5.36    0.35 
  -7  -2  -4    5.59    0.27 
   7   2   4    5.09    0.29 
   7   2   4    5.37    0.29 
  -8  -2  -4   16.60    0.66 
  -8  -2  -4   16.38    0.73 
  -8  -2  -4   15.20    0.75 
   8   2   4   16.86    0.71 
   8   2   4   16.31    0.70 
  -9  -2  -4    8.37    0.51 
  -9  -2  -4    8.33    0.47 
  -9  -2  -4    8.74    0.40 
   9   2   4    7.66    0.42 
   9   2   4    8.49    0.44 
 -10  -2  -4    1.32    0.22 
 -10  -2  -4    0.73    0.19 
 -10  -2  -4    1.12    0.16 
  10   2   4    0.78    0.15 
 -11  -2  -4    0.57    0.20 
 -11  -2  -4    0.36    0.16 
 -11  -2  -4    0.25    0.11 
  11   2   4    0.25    0.11 
 -12  -2  -4    0.95    0.24 
 -12  -2  -4    1.02    0.16 
  12   2   4    0.48    0.14 
  10  -3  -4    0.15    0.13 
 -10   3   4    0.42    0.10 
   9  -3  -4    7.13    0.45 
  -9   3   4    6.87    0.34 
  -9   3   4    6.62    0.45 
   8  -3  -4   36.16    1.42 
  -8   3   4   34.92    1.44 
  -8   3   4   33.61    1.30 
   7  -3  -4   28.48    1.17 
  -7   3   4   27.86    1.08 
  -7   3   4   32.87    1.32 
  -7   3   4   28.41    1.20 
  -7   3   4   27.33    1.14 
   6  -3  -4    0.31    0.10 
  -6   3   4    0.51    0.14 
  -6   3   4    0.48    0.11 
  -6   3   4    0.46    0.09 
  -6   3   4    0.37    0.07 
   5  -3  -4    8.19    0.40 
  -5   3   4    8.10    0.42 
  -5   3   4    8.34    0.34 
  -5   3   4    8.11    0.38 
  -5   3   4    7.71    0.37 
   4  -3  -4    0.49    0.09 
   4  -3  -4    0.68    0.08 
  -4   3   4    0.43    0.10 
  -4   3   4    0.62    0.09 
  -4   3   4    0.60    0.07 
  -4   3   4    0.50    0.09 
   3  -3  -4    1.51    0.11 
   3  -3  -4    1.67    0.12 
   3  -3  -4    1.53    0.13 
  -3   3   4    1.82    0.13 
  -3   3   4    1.80    0.10 
  -3   3   4    1.60    0.15 
  -3   3   4    1.71    0.11 
   2  -3  -4   57.83    2.01 
  -2   3   4   52.49    2.02 
  -2   3   4   52.59    1.99 
  -2   3   4   54.69    1.99 
  -2   3   4   57.44    2.00 
  -2   3   4   62.98    2.04 
   1  -3  -4    0.08    0.03 
   1  -3  -4    0.06    0.03 
  -1   3   4    0.08    0.03 
  -1   3   4    0.13    0.04 
  -1   3   4    0.03    0.02 
  -1   3   4    0.07    0.02 
   0  -3  -4    0.05    0.02 
   0  -3  -4    0.02    0.01 
   0  -3  -4    0.02    0.02 
   0  -3  -4    0.00    0.02 
   0   3   4    0.07    0.02 
   0   3   4    0.06    0.02 
   0   3   4    0.17    0.04 
  -1  -3  -4  202.26    6.83 
  -1  -3  -4  199.00    6.82 
  -1  -3  -4  184.02    6.78 
   1   3   4  186.84    6.80 
  -2  -3  -4    8.17    0.30 
  -2  -3  -4    7.38    0.29 
  -2  -3  -4    7.79    0.33 
   2   3   4    7.85    0.31 
   2   3   4    7.83    0.29 
  -3  -3  -4   97.46    3.58 
  -3  -3  -4  100.96    3.55 
  -3  -3  -4  101.91    3.53 
   3   3   4   99.74    3.55 
   3   3   4  101.42    3.52 
   3   3   4  100.35    3.52 
  -4  -3  -4    3.56    0.17 
  -4  -3  -4    3.61    0.23 
  -4  -3  -4    3.43    0.19 
   4   3   4    3.36    0.18 
   4   3   4    3.63    0.15 
   4   3   4    3.36    0.18 
  -5  -3  -4    3.85    0.19 
  -5  -3  -4    4.00    0.25 
  -5  -3  -4    3.84    0.22 
   5   3   4    3.53    0.20 
   5   3   4    3.56    0.16 
   5   3   4    3.68    0.20 
  -6  -3  -4   12.85    0.51 
  -6  -3  -4   12.08    0.58 
  -6  -3  -4   12.84    0.56 
   6   3   4   12.15    0.53 
   6   3   4   12.69    0.54 
  -7  -3  -4    8.54    0.37 
  -7  -3  -4    7.94    0.45 
  -7  -3  -4    7.33    0.42 
   7   3   4    8.65    0.40 
   7   3   4    8.43    0.40 
  -8  -3  -4   12.27    0.63 
  -8  -3  -4   12.39    0.54 
  -8  -3  -4   12.13    0.61 
   8   3   4   13.09    0.57 
   8   3   4   13.54    0.59 
  -9  -3  -4    6.70    0.34 
  -9  -3  -4    5.45    0.41 
  -9  -3  -4    6.17    0.40 
   9   3   4    6.49    0.36 
   9   3   4    6.90    0.38 
 -10  -3  -4    0.06    0.08 
 -10  -3  -4   -0.08    0.14 
 -10  -3  -4    0.03    0.11 
  10   3   4    0.03    0.08 
  10   3   4    0.03    0.07 
 -11  -3  -4    2.44    0.34 
 -11  -3  -4    2.31    0.23 
 -11  -3  -4    3.24    0.32 
  11   3   4    2.80    0.26 
 -12  -3  -4    0.81    0.24 
 -12  -3  -4    0.97    0.16 
  12   3   4    0.97    0.18 
  10  -4  -4    2.29    0.27 
 -10   4   4    1.90    0.17 
   9  -4  -4   27.56    1.20 
  -9   4   4   27.80    1.06 
  -9   4   4   28.37    1.21 
   8  -4  -4   13.24    0.66 
  -8   4   4   13.08    0.68 
  -8   4   4   13.77    0.55 
   7  -4  -4    1.31    0.17 
  -7   4   4    1.25    0.12 
  -7   4   4    1.21    0.16 
  -7   4   4    1.35    0.22 
   6  -4  -4    0.22    0.10 
  -6   4   4    0.21    0.05 
  -6   4   4    0.18    0.08 
  -6   4   4    0.33    0.09 
  -6   4   4    0.43    0.13 
   5  -4  -4    1.18    0.14 
  -5   4   4    1.29    0.14 
  -5   4   4    1.32    0.12 
  -5   4   4    1.38    0.17 
  -5   4   4    1.33    0.10 
   4  -4  -4   15.86    0.67 
  -4   4   4   16.81    0.60 
  -4   4   4   16.25    0.62 
  -4   4   4   16.18    0.68 
  -4   4   4   15.77    0.65 
   3  -4  -4   31.40    1.16 
   3  -4  -4   32.73    1.20 
  -3   4   4   32.94    1.13 
  -3   4   4   30.51    1.20 
  -3   4   4   29.73    1.13 
  -3   4   4   33.00    1.18 
  -3   4   4   31.75    1.14 
   2  -4  -4   74.53    2.69 
   2  -4  -4   75.32    2.73 
  -2   4   4   77.77    2.72 
  -2   4   4   76.64    2.67 
   1  -4  -4   27.10    1.03 
   1  -4  -4   28.52    0.99 
  -1   4   4   29.80    1.02 
  -1   4   4   23.41    1.01 
  -1   4   4   29.70    1.02 
   0  -4  -4   45.00    1.65 
   0  -4  -4   41.59    1.62 
   0  -4  -4   47.89    1.63 
   0  -4  -4   49.22    1.64 
   0   4   4   45.40    1.63 
   0   4   4   46.36    1.64 
  -1  -4  -4   69.02    2.43 
  -1  -4  -4   70.14    2.41 
  -1  -4  -4   70.18    2.44 
  -1  -4  -4   68.96    2.41 
   1   4   4   64.08    2.42 
  -2  -4  -4   17.57    0.68 
  -2  -4  -4   16.90    0.64 
   2   4   4   17.96    0.65 
   2   4   4   18.24    0.64 
  -3  -4  -4   75.69    2.67 
  -3  -4  -4   73.10    2.65 
  -3  -4  -4   79.51    2.71 
   3   4   4   74.81    2.67 
   3   4   4   72.39    2.68 
  -4  -4  -4    0.07    0.03 
  -4  -4  -4    0.06    0.06 
  -4  -4  -4    0.07    0.05 
   4   4   4    0.05    0.03 
   4   4   4    0.08    0.04 
  -5  -4  -4    0.05    0.06 
  -5  -4  -4    0.07    0.08 
  -5  -4  -4    0.06    0.03 
   5   4   4    0.00    0.03 
   5   4   4    0.08    0.04 
  -6  -4  -4   23.00    0.95 
  -6  -4  -4   22.51    0.92 
  -6  -4  -4   23.40    0.86 
   6   4   4   22.81    0.89 
   6   4   4   22.42    0.89 
  -7  -4  -4   34.97    1.35 
  -7  -4  -4   34.31    1.38 
  -7  -4  -4   33.51    1.27 
   7   4   4   33.25    1.30 
   7   4   4   34.50    1.31 
  -8  -4  -4   20.44    0.82 
  -8  -4  -4   20.69    0.90 
  -8  -4  -4   20.86    0.94 
   8   4   4   21.21    0.87 
   8   4   4   21.10    0.86 
  -9  -4  -4    0.30    0.09 
  -9  -4  -4    0.45    0.15 
  -9  -4  -4    0.32    0.16 
   9   4   4    0.26    0.09 
   9   4   4    0.27    0.09 
 -10  -4  -4    0.12    0.14 
 -10  -4  -4    0.19    0.15 
 -10  -4  -4    0.27    0.10 
  10   4   4    0.14    0.10 
  10   4   4    0.22    0.10 
 -11  -4  -4    4.31    0.38 
 -11  -4  -4    4.01    0.42 
 -11  -4  -4    4.51    0.30 
  11   4   4    4.64    0.33 
  11   4   4    4.50    0.37 
 -12  -4  -4    0.61    0.22 
 -12  -4  -4    0.56    0.13 
  12   4   4    0.71    0.16 
  10  -5  -4    2.71    0.30 
   9  -5  -4    0.67    0.17 
  -9   5   4    0.43    0.15 
  -9   5   4    0.44    0.07 
   8  -5  -4    3.40    0.30 
  -8   5   4    3.27    0.18 
  -8   5   4    3.68    0.28 
  -8   5   4    4.23    0.33 
   7  -5  -4    0.32    0.11 
  -7   5   4    0.22    0.11 
  -7   5   4    0.33    0.09 
  -7   5   4    0.24    0.05 
   6  -5  -4    1.53    0.17 
  -6   5   4    1.61    0.20 
  -6   5   4    1.19    0.15 
  -6   5   4    1.37    0.09 
   5  -5  -4   13.88    0.62 
  -5   5   4   13.18    0.55 
  -5   5   4   14.57    0.60 
  -5   5   4   13.37    0.61 
  -5   5   4   14.15    0.51 
   4  -5  -4   10.39    0.48 
   4  -5  -4   10.43    0.43 
  -4   5   4   10.15    0.47 
  -4   5   4   10.70    0.46 
  -4   5   4   10.42    0.41 
   3  -5  -4    0.03    0.03 
   3  -5  -4    0.01    0.05 
  -3   5   4    0.05    0.02 
  -3   5   4    0.06    0.05 
  -3   5   4    0.09    0.04 
   2  -5  -4   27.78    1.08 
   2  -5  -4   28.63    1.04 
  -2   5   4   29.42    1.07 
  -2   5   4   29.12    1.03 
   1  -5  -4    2.04    0.13 
  -1   5   4    2.17    0.12 
  -1   5   4    2.06    0.12 
   0  -5  -4  145.90    5.07 
   0  -5  -4  149.17    5.05 
   0   5   4  146.21    5.05 
   0   5   4  132.86    5.05 
   0   5   4  144.44    5.05 
   0   5   4  143.21    5.05 
  -1  -5  -4   50.80    1.79 
  -1  -5  -4   54.75    1.81 
  -1  -5  -4   47.30    1.80 
  -1  -5  -4   51.93    1.79 
   1   5   4   48.06    1.78 
   1   5   4   48.78    1.78 
  -2  -5  -4   21.28    0.82 
  -2  -5  -4   21.77    0.79 
   2   5   4   21.88    0.78 
   2   5   4   21.21    0.78 
  -3  -5  -4    0.57    0.07 
  -3  -5  -4    0.74    0.10 
   3   5   4    0.56    0.07 
   3   5   4    0.59    0.05 
   3   5   4    0.71    0.06 
  -4  -5  -4    1.29    0.07 
  -4  -5  -4    1.33    0.14 
  -4  -5  -4    1.32    0.12 
   4   5   4    1.28    0.10 
   4   5   4    1.35    0.10 
  -5  -5  -4   62.14    2.30 
  -5  -5  -4   60.60    2.26 
  -5  -5  -4   62.41    2.20 
   5   5   4   63.27    2.23 
   5   5   4   60.35    2.24 
  -6  -5  -4   14.36    0.56 
  -6  -5  -4   14.19    0.63 
  -6  -5  -4   14.73    0.66 
   6   5   4   14.03    0.59 
   6   5   4   14.83    0.60 
  -7  -5  -4    2.46    0.17 
  -7  -5  -4    2.76    0.27 
  -7  -5  -4    2.73    0.24 
   7   5   4    2.90    0.20 
   7   5   4    2.57    0.19 
  -8  -5  -4    0.79    0.18 
  -8  -5  -4    0.54    0.14 
  -8  -5  -4    0.63    0.11 
   8   5   4    0.49    0.11 
   8   5   4    0.70    0.12 
  -9  -5  -4    0.07    0.12 
  -9  -5  -4   -0.08    0.13 
   9   5   4    0.03    0.08 
   9   5   4    0.07    0.08 
 -10  -5  -4    0.01    0.16 
 -10  -5  -4    0.19    0.14 
  10   5   4    0.19    0.09 
  10   5   4    0.25    0.10 
 -11  -5  -4    5.72    0.49 
 -11  -5  -4    6.00    0.45 
  11   5   4    5.51    0.38 
  11   5   4    5.85    0.39 
 -12  -5  -4    0.03    0.20 
 -12  -5  -4    0.22    0.16 
  12   5   4    0.12    0.11 
   9  -6  -4    0.14    0.11 
  -9   6   4    0.16    0.13 
   8  -6  -4    2.90    0.28 
  -8   6   4    3.04    0.29 
  -8   6   4    2.90    0.25 
   7  -6  -4    7.48    0.43 
  -7   6   4    7.19    0.40 
  -7   6   4    7.37    0.43 
   6  -6  -4    8.56    0.46 
  -6   6   4    9.60    0.44 
  -6   6   4    8.20    0.45 
   5  -6  -4    2.87    0.23 
  -5   6   4    3.45    0.22 
  -5   6   4    3.27    0.23 
   4  -6  -4    5.04    0.29 
   4  -6  -4    5.39    0.24 
  -4   6   4    4.99    0.27 
  -4   6   4    5.22    0.23 
  -4   6   4    5.22    0.29 
   3  -6  -4    0.76    0.10 
   3  -6  -4    0.68    0.07 
  -3   6   4    0.75    0.09 
  -3   6   4    0.70    0.06 
  -3   6   4    0.84    0.10 
   2  -6  -4   10.78    0.46 
   2  -6  -4   10.71    0.41 
  -2   6   4   10.96    0.42 
  -2   6   4   11.61    0.45 
   1  -6  -4    0.43    0.07 
  -1   6   4    0.39    0.06 
  -1   6   4    0.38    0.05 
  -1   6   4    0.45    0.05 
   0  -6  -4   32.98    1.27 
   0  -6  -4   34.89    1.25 
   0   6   4   33.83    1.24 
   0   6   4   34.86    1.25 
   0   6   4   36.32    1.24 
  -1  -6  -4    7.63    0.33 
  -1  -6  -4    8.24    0.33 
  -1  -6  -4    7.46    0.32 
   1   6   4    8.32    0.29 
   1   6   4    7.38    0.29 
  -2  -6  -4    0.02    0.03 
  -2  -6  -4    0.03    0.04 
   2   6   4    0.11    0.02 
   2   6   4    0.03    0.01 
  -3  -6  -4    2.18    0.14 
  -3  -6  -4    2.13    0.16 
   3   6   4    2.11    0.11 
  -4  -6  -4   88.94    3.18 
  -4  -6  -4   88.10    3.15 
   4   6   4   87.70    3.13 
   4   6   4   82.43    3.11 
   4   6   4   90.88    3.12 
  -5  -6  -4    4.82    0.31 
  -5  -6  -4    5.14    0.29 
   5   6   4    5.01    0.24 
   5   6   4    5.18    0.26 
  -6  -6  -4    1.45    0.18 
  -6  -6  -4    1.23    0.19 
   6   6   4    1.46    0.13 
   6   6   4    1.43    0.14 
  -7  -6  -4    0.07    0.11 
  -7  -6  -4    0.17    0.11 
   7   6   4    0.07    0.06 
   7   6   4    0.05    0.06 
  -8  -6  -4    1.45    0.22 
  -8  -6  -4    1.43    0.24 
   8   6   4    1.06    0.15 
   8   6   4    0.94    0.14 
  -9  -6  -4    0.30    0.15 
  -9  -6  -4    0.35    0.17 
   9   6   4    0.32    0.10 
   9   6   4    0.47    0.11 
 -10  -6  -4    4.24    0.40 
 -10  -6  -4    4.34    0.38 
  10   6   4    4.25    0.31 
  10   6   4    4.84    0.32 
 -11  -6  -4    4.60    0.45 
 -11  -6  -4    3.84    0.39 
  11   6   4    4.44    0.33 
  11   6   4    4.43    0.33 
   9  -7  -4    0.45    0.16 
  -9   7   4    0.21    0.11 
  -9   7   4    0.20    0.14 
   8  -7  -4    4.33    0.33 
  -8   7   4    4.25    0.31 
  -8   7   4    3.56    0.31 
   7  -7  -4    1.87    0.22 
  -7   7   4    1.78    0.20 
  -7   7   4    1.99    0.22 
   6  -7  -4   26.28    1.14 
  -6   7   4   29.61    1.13 
  -6   7   4   28.19    1.14 
   5  -7  -4   28.02    1.14 
  -5   7   4   29.06    1.14 
  -5   7   4   28.76    1.13 
   4  -7  -4    0.33    0.09 
  -4   7   4    0.31    0.08 
  -4   7   4    0.32    0.08 
   3  -7  -4    6.42    0.32 
  -3   7   4    6.32    0.31 
  -3   7   4    6.47    0.28 
  -3   7   4    6.69    0.32 
   2  -7  -4   51.83    1.79 
  -2   7   4   44.69    1.75 
  -2   7   4   49.46    1.78 
  -2   7   4   48.17    1.77 
   1  -7  -4   54.57    1.75 
  -1   7   4   41.62    1.72 
  -1   7   4   54.14    1.71 
  -1   7   4   40.49    1.70 
   0  -7  -4    9.94    0.39 
   0  -7  -4    9.62    0.40 
   0   7   4    9.41    0.36 
  -1  -7  -4   11.76    0.46 
  -1  -7  -4   11.98    0.46 
  -1  -7  -4   10.70    0.47 
   1   7   4   11.37    0.42 
   1   7   4   11.82    0.42 
   1   7   4   11.13    0.42 
  -2  -7  -4   74.74    2.69 
  -2  -7  -4   75.69    2.71 
   2   7   4   74.79    2.64 
  -3  -7  -4   14.12    0.57 
  -3  -7  -4   14.24    0.60 
   3   7   4   14.38    0.53 
   3   7   4   13.78    0.52 
  -4  -7  -4    2.81    0.19 
  -4  -7  -4    2.66    0.20 
   4   7   4    2.69    0.17 
   4   7   4    2.63    0.14 
   4   7   4    2.48    0.14 
  -5  -7  -4   53.05    2.05 
  -5  -7  -4   56.20    2.08 
   5   7   4   54.36    2.02 
   5   7   4   56.99    2.00 
  -6  -7  -4    2.28    0.21 
  -6  -7  -4    2.05    0.22 
   6   7   4    2.07    0.15 
   6   7   4    2.00    0.16 
  -7  -7  -4    3.52    0.30 
  -7  -7  -4    3.17    0.27 
   7   7   4    3.28    0.21 
   7   7   4    3.30    0.22 
  -8  -7  -4    6.59    0.42 
  -8  -7  -4    5.94    0.42 
   8   7   4    6.11    0.35 
   8   7   4    7.18    0.36 
  -9  -7  -4    9.97    0.58 
  -9  -7  -4    9.87    0.61 
   9   7   4   11.13    0.52 
   9   7   4   11.05    0.53 
 -10  -7  -4    3.40    0.38 
 -10  -7  -4    2.67    0.33 
  10   7   4    3.41    0.27 
  10   7   4    3.10    0.27 
 -11  -7  -4   -0.28    0.16 
 -11  -7  -4   -0.18    0.12 
  11   7   4    0.12    0.10 
  11   7   4    0.01    0.09 
   9  -8  -4   -0.06    0.11 
  -9   8   4    0.26    0.12 
   8  -8  -4    2.30    0.24 
  -8   8   4    2.03    0.23 
  -8   8   4    1.95    0.22 
   7  -8  -4    8.73    0.49 
  -7   8   4    8.89    0.47 
  -7   8   4    9.15    0.49 
   6  -8  -4   28.00    1.21 
  -6   8   4   29.31    1.20 
  -6   8   4   32.01    1.21 
   5  -8  -4    9.07    0.47 
  -5   8   4    9.41    0.46 
  -5   8   4    9.76    0.46 
   4  -8  -4    9.96    0.48 
  -4   8   4   10.81    0.45 
  -4   8   4    8.99    0.45 
   3  -8  -4    0.72    0.12 
  -3   8   4    1.08    0.12 
  -3   8   4    1.10    0.11 
  -3   8   4    0.84    0.09 
   2  -8  -4   34.50    1.32 
  -2   8   4   35.01    1.32 
  -2   8   4   35.93    1.29 
   1  -8  -4    1.23    0.12 
  -1   8   4    1.45    0.09 
  -1   8   4    1.56    0.10 
   0  -8  -4   13.55    0.55 
   0   8   4   12.93    0.51 
   0   8   4   14.91    0.52 
  -1  -8  -4    2.00    0.13 
  -1  -8  -4    1.96    0.14 
  -1  -8  -4    2.10    0.15 
   1   8   4    2.07    0.09 
   1   8   4    1.87    0.08 
  -2  -8  -4    4.48    0.23 
  -2  -8  -4    4.44    0.24 
   2   8   4    4.28    0.16 
   2   8   4    3.80    0.16 
  -3  -8  -4   70.27    2.32 
  -3  -8  -4   63.85    2.29 
   3   8   4   56.33    2.21 
   3   8   4   60.54    2.21 
  -4  -8  -4    2.98    0.21 
  -4  -8  -4    2.91    0.23 
   4   8   4    3.02    0.18 
   4   8   4    3.30    0.15 
   4   8   4    3.02    0.15 
  -5  -8  -4   28.68    1.17 
  -5  -8  -4   31.89    1.21 
   5   8   4   29.10    1.10 
   5   8   4   28.89    1.13 
  -6  -8  -4    4.54    0.31 
  -6  -8  -4    4.28    0.32 
   6   8   4    4.55    0.26 
   6   8   4    4.50    0.24 
  -7  -8  -4    5.82    0.39 
  -7  -8  -4    5.61    0.37 
   7   8   4    5.90    0.32 
   7   8   4    5.84    0.31 
  -8  -8  -4    9.68    0.54 
  -8  -8  -4    9.32    0.56 
   8   8   4    9.35    0.45 
   8   8   4    9.36    0.47 
  -9  -8  -4    9.85    0.59 
  -9  -8  -4    9.74    0.60 
   9   8   4    9.97    0.51 
   9   8   4   10.52    0.50 
 -10  -8  -4    2.30    0.35 
 -10  -8  -4    1.96    0.30 
  10   8   4    2.14    0.22 
  10   8   4    2.31    0.23 
 -11  -8  -4    0.22    0.21 
 -11  -8  -4    0.06    0.16 
  11   8   4    0.06    0.09 
  11   8   4    0.11    0.11 
   8  -9  -4    5.29    0.39 
  -8   9   4    5.50    0.37 
  -8   9   4    5.45    0.38 
   7  -9  -4   13.78    0.68 
  -7   9   4   13.70    0.66 
  -7   9   4   13.71    0.66 
   6  -9  -4    0.76    0.15 
  -6   9   4    0.27    0.11 
  -6   9   4    1.01    0.16 
   5  -9  -4    0.04    0.08 
  -5   9   4    0.07    0.07 
  -5   9   4   -0.03    0.07 
   4  -9  -4    0.21    0.10 
  -4   9   4    0.32    0.09 
  -4   9   4    0.20    0.07 
   3  -9  -4    4.05    0.25 
  -3   9   4    4.13    0.23 
  -3   9   4    4.17    0.25 
   2  -9  -4    3.44    0.22 
  -2   9   4    3.80    0.22 
  -2   9   4    3.47    0.19 
   1  -9  -4   61.56    2.20 
  -1   9   4   60.07    2.20 
  -1   9   4   59.33    2.16 
   0  -9  -4   24.51    0.91 
   0   9   4   24.16    0.86 
   0   9   4   22.63    0.86 
  -1  -9  -4   15.17    0.63 
  -1  -9  -4   16.10    0.64 
  -1  -9  -4   15.06    0.61 
   1   9   4   14.53    0.54 
  -2  -9  -4   35.33    1.35 
  -2  -9  -4   34.25    1.33 
  -2  -9  -4   36.00    1.31 
  -3  -9  -4   25.10    0.97 
  -3  -9  -4   26.52    1.00 
   3   9   4   22.99    0.88 
   3   9   4   23.78    0.88 
  -4  -9  -4    0.06    0.07 
  -4  -9  -4    0.05    0.06 
   4   9   4    0.05    0.03 
   4   9   4    0.06    0.03 
  -5  -9  -4    2.59    0.21 
  -5  -9  -4    2.52    0.23 
   5   9   4    2.48    0.15 
   5   9   4    2.35    0.17 
  -6  -9  -4    2.36    0.22 
  -6  -9  -4    1.84    0.24 
   6   9   4    1.92    0.15 
   6   9   4    1.89    0.16 
  -7  -9  -4    8.20    0.49 
  -7  -9  -4    7.79    0.46 
   7   9   4    7.87    0.38 
   7   9   4    8.05    0.40 
  -8  -9  -4   23.06    1.04 
  -8  -9  -4   21.94    1.00 
   8   9   4   22.59    0.91 
   8   9   4   22.01    0.92 
  -9  -9  -4    4.65    0.40 
  -9  -9  -4    4.99    0.43 
   9   9   4    4.72    0.31 
   9   9   4    4.64    0.31 
 -10  -9  -4    0.39    0.18 
 -10  -9  -4    0.56    0.21 
  10   9   4    0.61    0.13 
  10   9   4    0.68    0.14 
   7 -10  -4    0.85    0.17 
  -7  10   4    1.16    0.19 
  -7  10   4    0.99    0.18 
   6 -10  -4    0.91    0.17 
  -6  10   4    1.25    0.18 
  -6  10   4    1.29    0.18 
   5 -10  -4    0.89    0.15 
  -5  10   4    1.00    0.16 
  -5  10   4    0.97    0.15 
   4 -10  -4    1.82    0.19 
  -4  10   4    1.82    0.16 
  -4  10   4    1.86    0.18 
   3 -10  -4   38.03    1.44 
  -3  10   4   37.52    1.44 
  -3  10   4   37.24    1.40 
   2 -10  -4   11.10    0.49 
  -2  10   4   10.08    0.45 
  -2  10   4   11.57    0.49 
   1 -10  -4    0.02    0.05 
  -1  10   4    0.05    0.04 
   0 -10  -4   12.16    0.52 
   0  10   4   12.64    0.46 
   0  10   4   12.10    0.46 
  -1 -10  -4   12.18    0.52 
  -1 -10  -4   12.21    0.55 
  -1 -10  -4   13.28    0.56 
  -2 -10  -4   16.15    0.69 
  -2 -10  -4   16.33    0.70 
  -2 -10  -4   16.26    0.65 
  -3 -10  -4    0.36    0.09 
  -3 -10  -4    0.59    0.12 
   3  10   4    0.48    0.04 
   3  10   4    0.50    0.05 
  -4 -10  -4    1.36    0.18 
  -4 -10  -4    1.27    0.15 
   4  10   4    1.25    0.09 
   4  10   4    1.39    0.10 
  -5 -10  -4    4.64    0.33 
  -5 -10  -4    4.31    0.29 
   5  10   4    4.25    0.21 
  -6 -10  -4    9.92    0.53 
  -6 -10  -4    9.63    0.51 
   6  10   4    8.91    0.43 
   6  10   4    8.79    0.40 
  -7 -10  -4    9.01    0.54 
  -7 -10  -4    8.77    0.51 
   7  10   4    9.01    0.41 
   7  10   4    8.66    0.44 
  -8 -10  -4   11.16    0.64 
  -8 -10  -4   11.44    0.62 
   8  10   4   10.85    0.53 
   8  10   4   10.67    0.51 
  -9 -10  -4    0.33    0.17 
  -9 -10  -4    0.52    0.18 
   9  10   4    0.23    0.09 
   9  10   4    0.42    0.13 
 -10 -10  -4    1.33    0.26 
 -10 -10  -4    1.00    0.26 
  10  10   4    0.87    0.15 
  10  10   4    0.75    0.15 
  -7  11   4    2.91    0.28 
   6 -11  -4    0.80    0.17 
  -6  11   4    1.26    0.18 
  -6  11   4    0.90    0.15 
   5 -11  -4    6.82    0.40 
  -5  11   4    6.55    0.36 
  -5  11   4    7.03    0.40 
   4 -11  -4   20.39    0.86 
  -4  11   4   20.71    0.82 
  -4  11   4   19.20    0.85 
   3 -11  -4    3.57    0.24 
  -3  11   4    3.22    0.21 
  -3  11   4    3.22    0.23 
   2 -11  -4    0.21    0.08 
  -2  11   4    0.17    0.06 
  -2  11   4    0.10    0.07 
   1 -11  -4   13.37    0.58 
  -1  11   4   13.74    0.53 
   0 -11  -4    0.15    0.07 
   0  11   4    0.05    0.03 
   0  11   4    0.15    0.04 
  -1 -11  -4    5.64    0.32 
  -1 -11  -4    5.62    0.29 
  -1 -11  -4    5.90    0.32 
  -2 -11  -4    6.85    0.38 
  -2 -11  -4    7.11    0.38 
  -2 -11  -4    6.90    0.33 
  -3 -11  -4   10.96    0.51 
  -3 -11  -4    9.26    0.51 
   3  11   4   10.72    0.39 
  -4 -11  -4    3.08    0.24 
  -4 -11  -4    2.78    0.26 
   4  11   4    2.60    0.14 
  -5 -11  -4    9.90    0.53 
  -5 -11  -4   10.15    0.52 
   5  11   4    9.10    0.40 
  -6 -11  -4   13.87    0.68 
  -6 -11  -4   13.43    0.70 
   6  11   4   13.75    0.56 
  -7 -11  -4    3.88    0.34 
  -7 -11  -4    4.62    0.37 
   7  11   4    4.40    0.28 
   7  11   4    4.21    0.25 
  -8 -11  -4   -0.24    0.10 
  -8 -11  -4    0.22    0.15 
   8  11   4    0.03    0.06 
   8  11   4   -0.03    0.08 
  -9 -11  -4    0.68    0.20 
  -9 -11  -4    0.85    0.23 
   9  11   4    0.46    0.11 
   9  11   4    0.49    0.13 
  -6  12   4    1.58    0.21 
  -6  12   4    1.16    0.19 
  -5  12   4    0.25    0.09 
  -5  12   4    0.19    0.10 
  -4  12   4    2.89    0.22 
  -4  12   4    3.23    0.25 
   3 -12  -4    5.39    0.32 
  -3  12   4    5.17    0.28 
  -3  12   4    5.64    0.33 
   2 -12  -4    4.01    0.26 
  -2  12   4    3.64    0.21 
   1 -12  -4    0.61    0.11 
  -1  12   4    0.83    0.09 
   0 -12  -4   10.56    0.46 
   0 -12  -4    9.84    0.49 
   0  12   4    9.72    0.39 
  -1 -12  -4    6.26    0.36 
  -1 -12  -4    6.32    0.36 
  -1 -12  -4    6.06    0.32 
  -2 -12  -4    4.00    0.28 
  -2 -12  -4    3.73    0.27 
  -2 -12  -4    3.31    0.22 
  -3 -12  -4    7.17    0.34 
  -3 -12  -4    6.30    0.39 
  -3 -12  -4    6.66    0.41 
  -4 -12  -4    5.11    0.34 
  -4 -12  -4    4.75    0.35 
   4  12   4    5.12    0.22 
  -5 -12  -4    4.92    0.36 
  -5 -12  -4    5.10    0.35 
   5  12   4    4.23    0.22 
  -6 -12  -4    4.88    0.37 
  -6 -12  -4    5.03    0.40 
   6  12   4    5.35    0.26 
  -7 -12  -4    2.54    0.31 
  -7 -12  -4    2.13    0.28 
   7  12   4    2.38    0.18 
  -8 -12  -4    0.31    0.18 
  -8 -12  -4    0.12    0.15 
   8  12   4    0.11    0.09 
   8  12   4    0.26    0.09 
  -9 -12  -4    1.02    0.26 
  -9 -12  -4    1.19    0.36 
   9  12   4    0.98    0.17 
   9  12   4    0.85    0.16 
  -5  13   4    0.45    0.13 
  -5  13   4    0.40    0.11 
  -4  13   4    9.24    0.50 
  -4  13   4    9.67    0.45 
  -3  13   4    2.95    0.20 
  -2  13   4    0.23    0.06 
  -1  13   4    3.48    0.18 
   0 -13  -4    6.08    0.34 
   0 -13  -4    6.53    0.38 
   0  13   4    6.81    0.27 
  -1 -13  -4    2.24    0.21 
  -1 -13  -4    2.06    0.17 
  -1 -13  -4    2.48    0.22 
  -2 -13  -4    1.65    0.20 
  -2 -13  -4    1.60    0.15 
  -2 -13  -4    1.43    0.19 
  -3 -13  -4    0.61    0.15 
  -3 -13  -4    0.48    0.13 
  -3 -13  -4    0.45    0.09 
  -4 -13  -4    0.09    0.11 
  -4 -13  -4    0.30    0.12 
   4  13   4    0.22    0.04 
  -5 -13  -4    4.44    0.34 
  -5 -13  -4    4.80    0.37 
   5  13   4    4.25    0.21 
  -6 -13  -4    4.08    0.37 
  -6 -13  -4    3.84    0.34 
   6  13   4    4.76    0.24 
  -7 -13  -4   -0.01    0.14 
  -7 -13  -4    0.06    0.12 
   7  13   4    0.12    0.07 
  -8 -13  -4    0.79    0.23 
   8  13   4    0.45    0.10 
  -3  14   4    0.06    0.07 
  -2  14   4    0.77    0.11 
   1 -14  -4    1.21    0.17 
  -1  14   4    0.81    0.10 
   0 -14  -4    2.65    0.26 
   0  14   4    3.16    0.15 
  -1 -14  -4    2.19    0.30 
  -1 -14  -4    1.21    0.18 
  -2 -14  -4    0.49    0.15 
  -2 -14  -4    0.52    0.13 
  -3 -14  -4    0.96    0.18 
  -3 -14  -4    0.60    0.16 
  -4 -14  -4    2.61    0.20 
  -4 -14  -4    2.31    0.26 
  -4 -14  -4    2.56    0.28 
   4  14   4    2.72    0.13 
  -5 -14  -4    0.44    0.14 
  -5 -14  -4    0.52    0.17 
   5  14   4    0.47    0.08 
  -6 -14  -4    0.16    0.15 
   6  14   4    0.14    0.06 
   1 -15  -4    2.10    0.24 
  -1  15   4    2.56    0.15 
   0 -15  -4    2.38    0.25 
   0  15   4    2.23    0.13 
  -1 -15  -4    0.74    0.16 
  -2 -15  -4    5.94    0.40 
  -2 -15  -4    6.05    0.48 
  -3 -15  -4    2.21    0.27 
  -4 -15  -4    0.02    0.11 
   1  11  -5    1.60    0.17 
   0  11  -5   -0.04    0.07 
  -1  11  -5    4.49    0.28 
  -2  11  -5    3.48    0.26 
   4  10  -5   12.18    0.56 
  -4 -10   5   11.82    0.69 
   3  10  -5    3.17    0.24 
  -3 -10   5    4.10    0.36 
   2  10  -5    0.55    0.10 
  -2 -10   5    0.42    0.16 
   1  10  -5    0.26    0.08 
  -1 -10   5    0.14    0.13 
   0  10  -5    3.71    0.24 
   0 -10   5    3.71    0.34 
  -1  10  -5    0.74    0.13 
   1 -10   5    1.08    0.20 
  -2  10  -5    1.13    0.16 
   2 -10   5    1.18    0.21 
  -3  10  -5    7.39    0.39 
  -4  10  -5    0.02    0.08 
  -4  10  -5   -0.13    0.09 
   5   9  -5    3.38    0.25 
  -5  -9   5    2.72    0.33 
   4   9  -5    2.22    0.21 
  -4  -9   5    2.43    0.30 
  -4  -9   5    2.61    0.30 
   3   9  -5   -0.04    0.06 
  -3  -9   5   -0.08    0.10 
   2   9  -5    1.00    0.14 
  -2  -9   5    1.19    0.22 
   1   9  -5    0.77    0.12 
  -1  -9   5    0.59    0.16 
   0   9  -5    1.38    0.14 
   0  -9   5    1.46    0.21 
  -1   9  -5   20.44    0.83 
   1  -9   5   20.88    0.95 
  -2   9  -5    2.67    0.20 
   2  -9   5    2.59    0.26 
  -3   9  -5   -0.11    0.09 
  -3   9  -5   -0.01    0.07 
  -4   9  -5    4.63    0.30 
  -4   9  -5    4.71    0.36 
  -5   9  -5    1.44    0.23 
  -5   9  -5    1.30    0.19 
  -6   9  -5   -0.06    0.11 
  -6   9  -5    0.16    0.11 
   6   8  -5    0.04    0.08 
  -6  -8   5   -0.09    0.11 
   5   8  -5    0.20    0.09 
  -5  -8   5    0.49    0.17 
  -5  -8   5    0.10    0.12 
   4   8  -5    1.25    0.16 
  -4  -8   5    1.02    0.20 
  -4  -8   5    0.87    0.19 
   3   8  -5    9.91    0.45 
  -3  -8   5    9.33    0.56 
   2   8  -5    0.22    0.08 
  -2  -8   5    0.15    0.10 
   1   8  -5   17.45    0.71 
  -1  -8   5   17.55    0.82 
   0   8  -5    4.79    0.27 
   0  -8   5    5.83    0.38 
  -1   8  -5    4.49    0.25 
   1  -8   5    4.62    0.33 
  -2   8  -5    2.91    0.20 
  -2   8  -5    3.25    0.28 
   2  -8   5    3.20    0.27 
  -3   8  -5    0.91    0.14 
  -3   8  -5    0.90    0.17 
  -4   8  -5    0.60    0.11 
  -4   8  -5    0.93    0.18 
  -5   8  -5    1.94    0.20 
  -5   8  -5    2.26    0.24 
  -6   8  -5    8.43    0.45 
  -6   8  -5    8.51    0.49 
  -7   8  -5    0.98    0.21 
  -7   8  -5    0.96    0.16 
   7   7  -5   -0.08    0.08 
  -7  -7   5    0.16    0.14 
   6   7  -5    2.07    0.21 
  -6  -7   5    2.35    0.31 
  -6  -7   5    2.41    0.28 
   5   7  -5    6.74    0.36 
  -5  -7   5    6.20    0.46 
  -5  -7   5    6.63    0.45 
   4   7  -5    0.89    0.14 
  -4  -7   5    1.29    0.21 
  -4  -7   5    1.16    0.19 
   3   7  -5   16.07    0.67 
  -3  -7   5   16.29    0.79 
   2   7  -5   18.52    0.74 
  -2  -7   5   17.64    0.83 
   1   7  -5    3.36    0.21 
  -1  -7   5    3.51    0.28 
   0   7  -5    0.91    0.11 
   0  -7   5    0.73    0.15 
  -1   7  -5    0.18    0.06 
   1  -7   5    0.20    0.09 
  -2   7  -5    6.48    0.39 
  -2   7  -5    6.44    0.32 
   2  -7   5    6.52    0.39 
  -3   7  -5    6.01    0.36 
  -3   7  -5    5.21    0.29 
  -4   7  -5    6.67    0.34 
  -4   7  -5    6.05    0.38 
  -5   7  -5    7.74    0.40 
  -5   7  -5    7.41    0.44 
  -6   7  -5    1.09    0.18 
  -6   7  -5    1.02    0.16 
  -6   7  -5    0.89    0.17 
  -7   7  -5    3.92    0.32 
  -7   7  -5    3.49    0.29 
  -7   7  -5    3.47    0.28 
  -8   7  -5    0.90    0.18 
  -8   7  -5    1.67    0.25 
   8   6  -5    2.74    0.26 
   8   6  -5    3.04    0.27 
  -8  -6   5    2.71    0.33 
   7   6  -5    7.58    0.42 
   7   6  -5    7.47    0.41 
  -7  -6   5    7.62    0.51 
  -7  -6   5    6.99    0.53 
   6   6  -5    2.55    0.22 
  -6  -6   5    2.00    0.25 
  -6  -6   5    2.22    0.28 
   5   6  -5   -0.02    0.06 
  -5  -6   5    0.15    0.12 
  -5  -6   5   -0.06    0.07 
   4   6  -5   21.38    0.85 
  -4  -6   5   21.04    0.94 
  -4  -6   5   20.63    0.96 
   3   6  -5    1.61    0.15 
  -3  -6   5    1.39    0.19 
   2   6  -5    4.61    0.25 
  -2  -6   5    4.19    0.31 
   1   6  -5    6.39    0.31 
  -1  -6   5    6.32    0.38 
   0   6  -5    8.42    0.38 
   0  -6   5    8.29    0.44 
  -1   6  -5    0.42    0.07 
  -1   6  -5    0.60    0.12 
   1  -6   5    0.80    0.14 
  -2   6  -5    4.32    0.23 
  -2   6  -5    4.19    0.29 
  -3   6  -5   36.05    1.33 
  -3   6  -5   33.90    1.38 
  -4   6  -5    0.47    0.12 
  -4   6  -5    0.34    0.08 
  -5   6  -5    0.05    0.08 
  -5   6  -5    0.01    0.06 
  -5   6  -5    0.10    0.09 
  -6   6  -5    0.14    0.08 
  -6   6  -5    0.16    0.09 
  -6   6  -5    0.15    0.10 
  -7   6  -5    0.00    0.09 
  -7   6  -5    0.06    0.10 
  -7   6  -5   -0.07    0.07 
  -8   6  -5    0.16    0.11 
  -8   6  -5    0.03    0.11 
  -8   6  -5   -0.03    0.08 
  -9   6  -5    2.24    0.26 
  -9   6  -5    2.47    0.29 
   8   5  -5    2.41    0.24 
   8   5  -5    2.85    0.26 
  -8  -5   5    2.59    0.37 
  -8  -5   5    2.03    0.29 
   7   5  -5    1.37    0.19 
   7   5  -5    1.79    0.20 
  -7  -5   5    1.22    0.23 
  -7  -5   5    1.44    0.24 
   6   5  -5    0.08    0.08 
   6   5  -5    0.14    0.08 
  -6  -5   5    0.24    0.11 
  -6  -5   5   -0.05    0.12 
   5   5  -5    2.43    0.20 
  -5  -5   5    1.89    0.25 
  -5  -5   5    2.38    0.24 
   4   5  -5    1.00    0.13 
   4   5  -5    1.18    0.12 
  -4  -5   5    1.38    0.20 
  -4  -5   5    1.03    0.17 
   3   5  -5   19.14    0.78 
   3   5  -5   19.74    0.77 
  -3  -5   5   19.31    0.86 
   2   5  -5   24.55    0.98 
  -2  -5   5   26.93    1.07 
   1   5  -5   13.80    0.56 
  -1  -5   5   13.48    0.62 
   0   5  -5    0.25    0.06 
   0  -5   5    0.20    0.08 
  -1   5  -5    0.56    0.08 
  -1   5  -5    0.48    0.11 
   1  -5   5    0.64    0.12 
  -2   5  -5   25.68    1.03 
  -2   5  -5   25.43    0.98 
  -3   5  -5   10.39    0.50 
  -3   5  -5   10.61    0.46 
  -4   5  -5   18.80    0.81 
  -4   5  -5   19.20    0.77 
  -4   5  -5   19.01    0.79 
  -5   5  -5    0.42    0.10 
  -5   5  -5    0.40    0.09 
  -5   5  -5    0.43    0.12 
  -6   5  -5    0.45    0.10 
  -6   5  -5    0.47    0.12 
  -6   5  -5    0.54    0.11 
  -7   5  -5    2.80    0.26 
  -7   5  -5    2.82    0.24 
  -7   5  -5    3.35    0.25 
  -8   5  -5    9.45    0.51 
  -8   5  -5    9.94    0.52 
  -8   5  -5   10.20    0.55 
  -9   5  -5    3.21    0.29 
  -9   5  -5    2.83    0.28 
  -9   5  -5    3.16    0.29 
   9   4  -5    0.04    0.10 
   9   4  -5    0.28    0.13 
  -9  -4   5    0.00    0.14 
   8   4  -5    0.69    0.14 
   8   4  -5    1.25    0.19 
  -8  -4   5    0.76    0.21 
  -8  -4   5    0.85    0.20 
   7   4  -5    9.84    0.49 
   7   4  -5    9.19    0.49 
  -7  -4   5    9.51    0.55 
  -7  -4   5    9.36    0.59 
   6   4  -5    1.48    0.17 
   6   4  -5    1.28    0.16 
  -6  -4   5    0.63    0.17 
  -6  -4   5    1.05    0.19 
   5   4  -5    5.02    0.29 
   5   4  -5    4.92    0.29 
  -5  -4   5    4.92    0.36 
  -5  -4   5    4.94    0.33 
   4   4  -5   10.67    0.48 
   4   4  -5   10.60    0.48 
  -4  -4   5   10.66    0.55 
  -4  -4   5   10.91    0.54 
   3   4  -5   52.45    1.90 
   3   4  -5   56.82    1.90 
  -3  -4   5   50.58    1.97 
  -3  -4   5   46.37    1.87 
   2   4  -5    3.02    0.16 
   2   4  -5    2.59    0.17 
  -2  -4   5    2.61    0.21 
   1   4  -5    5.11    0.25 
   1   4  -5    4.64    0.21 
  -1  -4   5    4.82    0.29 
   0   4  -5    0.42    0.09 
   0   4  -5    0.43    0.08 
   0  -4   5    0.51    0.10 
  -1   4  -5   22.60    0.88 
  -1   4  -5   21.34    0.83 
   1  -4   5   21.22    0.88 
  -2   4  -5    8.19    0.40 
  -2   4  -5    7.91    0.36 
  -3   4  -5   27.61    1.09 
  -3   4  -5   27.44    1.05 
  -4   4  -5    3.81    0.25 
  -4   4  -5    4.15    0.24 
  -4   4  -5    3.43    0.22 
  -5   4  -5   13.01    0.61 
  -5   4  -5   13.24    0.59 
  -5   4  -5   13.98    0.59 
  -6   4  -5   23.39    0.96 
  -6   4  -5   23.90    0.97 
  -6   4  -5   24.27    1.00 
  -7   4  -5   -0.02    0.09 
  -7   4  -5    0.28    0.09 
  -7   4  -5   -0.06    0.06 
  -8   4  -5    1.25    0.19 
  -8   4  -5    1.44    0.18 
  -8   4  -5    1.24    0.09 
  -8   4  -5    1.43    0.19 
  -9   4  -5    0.27    0.12 
  -9   4  -5    0.49    0.13 
 -10   4  -5    0.12    0.12 
   9   3  -5   16.66    0.79 
  -9  -3   5   16.35    0.73 
  -9  -3   5   16.21    0.82 
   8   3  -5    5.84    0.36 
   8   3  -5    6.19    0.39 
  -8  -3   5    6.05    0.48 
  -8  -3   5    6.27    0.42 
  -8  -3   5    5.63    0.33 
   7   3  -5   -0.14    0.07 
   7   3  -5   -0.04    0.07 
  -7  -3   5    0.00    0.06 
  -7  -3   5   -0.06    0.09 
  -7  -3   5    0.09    0.14 
   6   3  -5   11.99    0.54 
   6   3  -5   11.93    0.55 
  -6  -3   5   10.80    0.60 
  -6  -3   5   11.23    0.50 
  -6  -3   5   10.70    0.57 
   5   3  -5   22.84    0.92 
   5   3  -5   21.79    0.93 
  -5  -3   5   22.81    0.89 
  -5  -3   5   24.96    1.02 
  -5  -3   5   23.17    0.98 
   4   3  -5    4.10    0.24 
   4   3  -5    4.20    0.24 
  -4  -3   5    4.27    0.28 
  -4  -3   5    3.93    0.22 
  -4  -3   5    3.99    0.29 
   3   3  -5    3.42    0.20 
   3   3  -5    3.94    0.21 
  -3  -3   5    3.14    0.25 
  -3  -3   5    3.11    0.18 
   2   3  -5    6.73    0.33 
   2   3  -5    7.23    0.32 
  -2  -3   5    7.99    0.32 
  -2  -3   5    7.32    0.38 
   1   3  -5    8.16    0.34 
   1   3  -5    8.28    0.36 
  -1  -3   5    8.58    0.40 
   0   3  -5   15.56    0.65 
   0   3  -5   16.22    0.63 
   0   3  -5   15.74    0.58 
   0  -3   5   15.81    0.66 
  -1   3  -5   24.99    0.92 
  -1   3  -5   24.18    0.95 
   1  -3   5   23.26    0.94 
  -2   3  -5    2.74    0.16 
  -2   3  -5    3.06    0.19 
  -3   3  -5    1.61    0.12 
  -3   3  -5    1.79    0.14 
  -3   3  -5    1.52    0.15 
  -3   3  -5    1.63    0.08 
  -4   3  -5   13.99    0.60 
  -4   3  -5   13.67    0.62 
  -4   3  -5   14.43    0.59 
  -4   3  -5   15.00    0.53 
  -5   3  -5    0.38    0.06 
  -5   3  -5    0.37    0.08 
  -5   3  -5    0.31    0.09 
  -5   3  -5    0.26    0.08 
  -6   3  -5    1.81    0.17 
  -6   3  -5    2.00    0.17 
  -6   3  -5    1.85    0.12 
  -6   3  -5    2.23    0.21 
  -7   3  -5    1.07    0.18 
  -7   3  -5    0.99    0.10 
  -7   3  -5    1.01    0.15 
  -7   3  -5    0.90    0.15 
  -8   3  -5    0.70    0.16 
  -8   3  -5    0.45    0.11 
  -8   3  -5    0.42    0.11 
  -8   3  -5    0.59    0.08 
  -9   3  -5    0.10    0.08 
  -9   3  -5    0.06    0.10 
  -9   3  -5   -0.04    0.05 
 -10   3  -5    4.10    0.36 
 -10   3  -5    4.21    0.22 
 -10   3  -5    4.55    0.34 
   9   2  -5   10.12    0.56 
  -9  -2   5   10.08    0.50 
  -9  -2   5   10.48    0.61 
  -9  -2   5    9.59    0.65 
   8   2  -5    2.76    0.25 
   8   2  -5    2.67    0.24 
  -8  -2   5    2.17    0.33 
  -8  -2   5    2.86    0.23 
  -8  -2   5    2.86    0.28 
   7   2  -5   11.92    0.55 
   7   2  -5   11.39    0.57 
  -7  -2   5   11.13    0.63 
  -7  -2   5   11.07    0.51 
  -7  -2   5   11.81    0.59 
   6   2  -5   15.26    0.68 
   6   2  -5   16.08    0.67 
  -6  -2   5   15.30    0.64 
  -6  -2   5   14.48    0.70 
  -6  -2   5   15.79    0.76 
   5   2  -5    8.97    0.40 
   5   2  -5    7.59    0.40 
  -5  -2   5    8.18    0.37 
  -5  -2   5    8.29    0.47 
  -5  -2   5    7.49    0.42 
   4   2  -5   33.82    1.26 
   4   2  -5   32.56    1.26 
  -4  -2   5   33.56    1.32 
  -4  -2   5   32.65    1.23 
  -4  -2   5   32.47    1.28 
   3   2  -5   17.58    0.69 
  -3  -2   5   18.12    0.72 
  -3  -2   5   16.42    0.66 
  -3  -2   5   16.67    0.73 
   2   2  -5    7.39    0.35 
   2   2  -5    7.96    0.34 
  -2  -2   5    7.42    0.38 
  -2  -2   5    8.55    0.33 
   1   2  -5   19.45    0.76 
   1   2  -5   20.99    0.75 
  -1  -2   5   19.16    0.80 
   0   2  -5  282.82   10.11 
   0   2  -5  291.14   10.13 
   0   2  -5  271.84   10.10 
   0   2  -5  311.98   10.12 
   0  -2   5  279.55   10.13 
  -1   2  -5    0.16    0.05 
  -1   2  -5    0.04    0.03 
  -1   2  -5    0.26    0.06 
  -1   2  -5    0.15    0.02 
   1  -2   5    0.00    0.04 
  -2   2  -5    1.09    0.11 
  -2   2  -5    1.10    0.10 
  -2   2  -5    1.16    0.07 
  -3   2  -5    0.59    0.06 
  -3   2  -5    0.69    0.08 
  -3   2  -5    0.67    0.08 
  -3   2  -5    0.46    0.09 
   3  -2   5    0.69    0.08 
  -4   2  -5    1.47    0.12 
  -4   2  -5    1.24    0.14 
  -4   2  -5    1.21    0.12 
  -4   2  -5    1.35    0.09 
   4  -2   5    1.39    0.08 
  -5   2  -5   24.57    0.96 
  -5   2  -5   24.53    0.98 
  -5   2  -5   25.29    0.96 
  -5   2  -5   24.16    0.90 
   5  -2   5   24.19    0.91 
  -6   2  -5   33.73    1.25 
  -6   2  -5   33.21    1.31 
  -6   2  -5   34.84    1.35 
  -6   2  -5   35.43    1.32 
   6  -2   5   34.25    1.27 
  -7   2  -5   26.50    1.07 
  -7   2  -5   27.16    1.04 
  -7   2  -5   25.59    0.96 
  -7   2  -5   25.55    1.04 
   7  -2   5   24.38    0.98 
  -8   2  -5   21.28    0.92 
  -8   2  -5   20.93    0.79 
  -8   2  -5   20.54    0.88 
  -8   2  -5   20.23    0.88 
  -9   2  -5    4.18    0.23 
  -9   2  -5    3.94    0.30 
  -9   2  -5    4.16    0.34 
 -10   2  -5    0.55    0.14 
 -10   2  -5    0.42    0.09 
 -10   2  -5    0.54    0.16 
 -11   2  -5    0.58    0.10 
 -11   2  -5    1.00    0.20 
  10   1  -5    3.57    0.34 
 -10  -1   5    3.43    0.28 
   9   1  -5    0.20    0.12 
  -9  -1   5    0.08    0.17 
  -9  -1   5    0.10    0.09 
   8   1  -5    1.35    0.21 
  -8  -1   5    1.72    0.27 
  -8  -1   5    1.08    0.21 
  -8  -1   5    1.46    0.18 
   7   1  -5    0.51    0.11 
   7   1  -5    0.46    0.12 
  -7  -1   5    0.51    0.14 
  -7  -1   5    0.96    0.14 
  -7  -1   5    0.49    0.17 
   6   1  -5   29.80    1.22 
   6   1  -5   32.28    1.21 
  -6  -1   5   29.06    1.22 
  -6  -1   5   31.24    1.17 
  -6  -1   5   31.28    1.29 
   5   1  -5   34.58    1.30 
   5   1  -5   33.86    1.32 
  -5  -1   5   35.29    1.38 
  -5  -1   5   34.33    1.33 
  -5  -1   5   31.99    1.27 
   4   1  -5   31.86    1.19 
   4   1  -5   31.23    1.20 
  -4  -1   5   32.37    1.17 
  -4  -1   5   30.43    1.21 
  -4  -1   5   29.87    1.24 
   3   1  -5    2.46    0.16 
   3   1  -5    2.17    0.16 
  -3  -1   5    2.53    0.15 
  -3  -1   5    2.40    0.17 
  -3  -1   5    2.33    0.19 
  -3  -1   5    2.36    0.15 
   2   1  -5   18.71    0.81 
   2   1  -5   22.21    0.82 
  -2  -1   5   22.23    0.80 
  -2  -1   5   23.99    0.86 
  -2  -1   5   19.82    0.81 
   1   1  -5   65.22    2.33 
   1   1  -5   61.26    2.30 
   1   1  -5   65.51    2.32 
  -1  -1   5   66.09    2.36 
  -1  -1   5   63.52    2.33 
  -1  -1   5   67.50    2.31 
   0   1  -5   13.28    0.48 
   0   1  -5   11.54    0.48 
   0   1  -5   13.02    0.52 
   0   1  -5   12.91    0.51 
   0  -1   5   12.76    0.52 
   0  -1   5   12.81    0.51 
  -1   1  -5  153.16    5.57 
  -1   1  -5  159.15    5.55 
  -1   1  -5  155.00    5.59 
  -1   1  -5  153.42    5.53 
   1  -1   5  169.88    5.59 
   1  -1   5  156.23    5.57 
  -2   1  -5    0.23    0.04 
  -2   1  -5    0.29    0.03 
  -2   1  -5    0.25    0.05 
  -2   1  -5    0.24    0.06 
   2  -1   5    0.22    0.05 
  -3   1  -5    2.33    0.14 
  -3   1  -5    2.41    0.12 
  -3   1  -5    2.62    0.15 
  -3   1  -5    2.32    0.16 
   3  -1   5    2.40    0.15 
  -4   1  -5   72.04    2.62 
  -4   1  -5   72.48    2.65 
  -4   1  -5   73.51    2.65 
  -4   1  -5   75.14    2.68 
   4  -1   5   72.63    2.61 
   4  -1   5   76.22    2.66 
  -5   1  -5   54.03    2.01 
  -5   1  -5   52.09    1.97 
  -5   1  -5   53.91    1.93 
  -5   1  -5   55.40    1.98 
   5  -1   5   53.48    1.98 
   5  -1   5   54.65    1.94 
  -6   1  -5    7.86    0.38 
  -6   1  -5    8.04    0.33 
  -6   1  -5    7.32    0.37 
   6  -1   5    7.62    0.34 
  -7   1  -5    0.32    0.12 
  -7   1  -5    0.50    0.10 
  -7   1  -5    0.40    0.07 
  -7   1  -5    0.62    0.11 
   7  -1   5    0.56    0.09 
  -8   1  -5    0.07    0.11 
  -8   1  -5    0.09    0.08 
  -8   1  -5    0.14    0.06 
   8  -1   5    0.12    0.07 
  -9   1  -5    3.06    0.30 
  -9   1  -5    2.87    0.19 
  -9   1  -5    2.95    0.25 
   9  -1   5    3.11    0.22 
 -10   1  -5    0.29    0.15 
 -10   1  -5    0.42    0.09 
 -10   1  -5    0.49    0.14 
  10  -1   5    0.39    0.11 
 -11   1  -5    2.34    0.20 
 -11   1  -5    2.59    0.28 
 -11   1  -5    3.19    0.33 
  10   0  -5    2.16    0.29 
 -10   0   5    2.68    0.25 
   9   0  -5    1.84    0.24 
  -9   0   5    2.28    0.34 
  -9   0   5    2.43    0.22 
   8   0  -5    0.41    0.13 
  -8   0   5    0.21    0.09 
  -8   0   5    0.09    0.15 
   7   0  -5    0.42    0.12 
  -7   0   5    0.66    0.18 
  -7   0   5    0.51    0.09 
   6   0  -5   28.97    1.20 
   6   0  -5   30.60    1.18 
  -6   0   5   30.49    1.15 
  -6   0   5   30.79    1.26 
  -6   0   5   29.58    1.20 
   5   0  -5    6.66    0.36 
   5   0  -5    6.67    0.34 
  -5   0   5    7.08    0.41 
  -5   0   5    6.72    0.35 
  -5   0   5    6.76    0.32 
   4   0  -5    1.58    0.13 
   4   0  -5    1.36    0.15 
  -4   0   5    1.38    0.12 
  -4   0   5    1.45    0.13 
  -4   0   5    1.47    0.17 
  -4   0   5    1.37    0.13 
   3   0  -5    0.02    0.04 
   3   0  -5   -0.01    0.05 
  -3   0   5    0.11    0.07 
  -3   0   5   -0.01    0.03 
  -3   0   5    0.06    0.04 
  -3   0   5   -0.03    0.04 
   2   0  -5    0.11    0.05 
   2   0  -5    0.04    0.03 
  -2   0   5    0.04    0.05 
  -2   0   5    0.08    0.04 
  -2   0   5    0.08    0.04 
   1   0  -5  125.98    4.33 
   1   0  -5  122.04    4.33 
   1   0  -5  121.22    4.31 
  -1   0   5  121.23    4.33 
  -1   0   5  119.85    4.35 
  -1   0   5  123.45    4.32 
   0   0  -5   70.13    2.38 
   0   0  -5   66.13    2.40 
   0   0  -5   66.63    2.40 
   0   0  -5   67.08    2.38 
   0   0   5   66.74    2.40 
   0   0   5   65.55    2.40 
   0   0   5   66.91    2.38 
  -1   0  -5  235.13    8.33 
  -1   0  -5  238.84    8.33 
  -1   0  -5  229.32    8.32 
   1   0   5  243.19    8.32 
   1   0   5  237.05    8.33 
  -2   0  -5   55.09    1.95 
  -2   0  -5   55.97    1.97 
  -2   0  -5   56.22    1.93 
  -2   0  -5   55.14    1.92 
   2   0   5   48.80    1.95 
  -3   0  -5   30.99    1.14 
  -3   0  -5   32.13    1.16 
  -3   0  -5   30.39    1.18 
  -3   0  -5   31.79    1.15 
   3   0   5   31.48    1.17 
  -4   0  -5    5.33    0.24 
  -4   0  -5    5.25    0.25 
  -4   0  -5    5.64    0.27 
  -4   0  -5    5.42    0.29 
   4   0   5    5.53    0.23 
   4   0   5    5.61    0.27 
  -5   0  -5   17.31    0.70 
  -5   0  -5   18.18    0.74 
  -5   0  -5   18.50    0.67 
  -5   0  -5   17.48    0.71 
   5   0   5   16.25    0.71 
   5   0   5   18.32    0.68 
  -6   0  -5   53.90    2.03 
  -6   0  -5   54.94    2.03 
  -6   0  -5   54.29    1.98 
  -6   0  -5   55.39    2.07 
   6   0   5   55.85    2.00 
   6   0   5   56.00    2.04 
  -7   0  -5    2.73    0.17 
  -7   0  -5    2.79    0.24 
  -7   0  -5    2.61    0.21 
   7   0   5    2.80    0.27 
   7   0   5    3.00    0.19 
  -8   0  -5    3.16    0.24 
  -8   0  -5    3.01    0.27 
  -8   0  -5    3.08    0.19 
   8   0   5    2.93    0.21 
  -9   0  -5   20.44    0.92 
  -9   0  -5   20.72    0.89 
  -9   0  -5   20.18    0.80 
   9   0   5   20.12    0.84 
 -10   0  -5    1.54    0.16 
 -10   0  -5    1.62    0.26 
 -10   0  -5    1.61    0.22 
  10   0   5    1.33    0.18 
 -11   0  -5    0.11    0.16 
 -11   0  -5    0.22    0.13 
 -11   0  -5    0.06    0.08 
  11   0   5    0.09    0.09 
  10  -1  -5    0.07    0.13 
 -10   1   5    0.37    0.11 
   9  -1  -5    0.09    0.10 
  -9   1   5    0.00    0.08 
  -9   1   5    0.03    0.15 
   8  -1  -5    0.28    0.11 
  -8   1   5    0.24    0.16 
  -8   1   5    0.29    0.10 
   7  -1  -5    0.57    0.13 
  -7   1   5    0.36    0.12 
  -7   1   5    0.37    0.15 
  -7   1   5    0.45    0.09 
   6  -1  -5    0.17    0.09 
   6  -1  -5    0.14    0.07 
  -6   1   5    0.15    0.13 
  -6   1   5    0.24    0.07 
  -6   1   5    0.14    0.08 
   5  -1  -5   28.70    1.23 
   5  -1  -5   31.79    1.21 
  -5   1   5   30.04    1.26 
  -5   1   5   35.45    1.22 
  -5   1   5   32.36    1.21 
  -5   1   5   30.75    1.18 
   4  -1  -5    0.23    0.06 
   4  -1  -5    0.25    0.08 
  -4   1   5    0.20    0.05 
  -4   1   5    0.13    0.09 
  -4   1   5    0.13    0.05 
  -4   1   5    0.21    0.07 
   3  -1  -5  163.91    5.83 
   3  -1  -5  171.73    5.85 
  -3   1   5  158.45    5.82 
  -3   1   5  161.12    5.81 
  -3   1   5  164.11    5.87 
  -3   1   5  168.86    5.84 
   2  -1  -5  127.93    4.41 
   2  -1  -5  128.34    4.40 
   2  -1  -5  119.88    4.42 
  -2   1   5  126.11    4.42 
  -2   1   5  110.51    4.39 
  -2   1   5  130.32    4.40 
  -2   1   5  127.79    4.44 
   1  -1  -5   69.79    2.53 
   1  -1  -5   71.37    2.52 
   1  -1  -5   74.98    2.54 
  -1   1   5   64.74    2.52 
  -1   1   5   69.70    2.55 
  -1   1   5   75.16    2.54 
   0  -1  -5   11.91    0.47 
   0  -1  -5   11.93    0.48 
   0  -1  -5   12.86    0.47 
   0   1   5   12.13    0.47 
   0   1   5   12.12    0.48 
   0   1   5   12.49    0.48 
  -1  -1  -5   19.65    0.73 
  -1  -1  -5   19.19    0.73 
  -1  -1  -5   19.57    0.71 
  -1  -1  -5   18.53    0.71 
   1   1   5   20.05    0.73 
   1   1   5   18.85    0.72 
  -2  -1  -5   26.18    0.98 
  -2  -1  -5   27.30    0.99 
  -2  -1  -5   28.57    1.02 
  -2  -1  -5   28.06    1.01 
  -2  -1  -5   26.16    0.98 
   2   1   5   27.39    1.01 
  -3  -1  -5  174.54    6.21 
  -3  -1  -5  168.63    6.23 
  -3  -1  -5  173.68    6.19 
  -3  -1  -5  176.71    6.19 
   3   1   5  187.13    6.23 
  -4  -1  -5  161.59    5.81 
  -4  -1  -5  165.98    5.78 
  -4  -1  -5  164.71    5.75 
  -4  -1  -5  168.26    5.77 
   4   1   5  153.76    5.79 
   4   1   5  165.96    5.76 
  -5  -1  -5   24.97    0.98 
  -5  -1  -5   24.71    0.92 
  -5  -1  -5   24.16    0.94 
  -5  -1  -5   24.96    0.94 
   5   1   5   23.76    0.92 
   5   1   5   25.48    0.96 
  -6  -1  -5   13.71    0.62 
  -6  -1  -5   13.22    0.58 
  -6  -1  -5   14.29    0.55 
  -6  -1  -5   14.14    0.59 
   6   1   5   13.75    0.56 
   6   1   5   14.04    0.59 
  -7  -1  -5   23.34    0.96 
  -7  -1  -5   24.32    0.92 
  -7  -1  -5   23.97    1.01 
   7   1   5   24.56    0.94 
   7   1   5   23.82    0.96 
  -8  -1  -5    7.22    0.43 
  -8  -1  -5    6.56    0.38 
  -8  -1  -5    7.04    0.34 
   8   1   5    7.07    0.38 
   8   1   5    7.03    0.36 
  -9  -1  -5    0.99    0.15 
  -9  -1  -5    1.09    0.20 
  -9  -1  -5    1.07    0.18 
   9   1   5    1.28    0.15 
 -10  -1  -5    0.49    0.17 
 -10  -1  -5    0.41    0.10 
 -10  -1  -5    0.50    0.13 
  10   1   5    0.47    0.11 
 -11  -1  -5    0.57    0.12 
 -11  -1  -5    0.51    0.15 
 -11  -1  -5    0.65    0.19 
  11   1   5    0.40    0.13 
  10  -2  -5    0.27    0.14 
 -10   2   5    0.27    0.10 
   9  -2  -5   -0.06    0.09 
  -9   2   5    0.27    0.17 
  -9   2   5    0.10    0.08 
   8  -2  -5    1.25    0.20 
  -8   2   5    1.80    0.28 
  -8   2   5    1.46    0.17 
   7  -2  -5   11.55    0.58 
  -7   2   5   11.96    0.63 
  -7   2   5   11.84    0.51 
   6  -2  -5    3.64    0.27 
  -6   2   5    3.61    0.31 
  -6   2   5    3.66    0.24 
  -6   2   5    3.66    0.22 
  -6   2   5    3.46    0.24 
  -6   2   5    3.63    0.24 
   5  -2  -5    3.36    0.21 
   5  -2  -5    3.45    0.24 
  -5   2   5    3.22    0.21 
  -5   2   5    3.26    0.19 
  -5   2   5    3.14    0.21 
  -5   2   5    3.35    0.22 
  -5   2   5    3.28    0.27 
   4  -2  -5  109.17    4.04 
   4  -2  -5  113.79    4.07 
  -4   2   5  117.72    4.10 
  -4   2   5  118.03    4.02 
  -4   2   5  116.66    4.05 
  -4   2   5  106.21    4.05 
  -4   2   5  111.31    4.03 
   3  -2  -5   83.82    3.04 
   3  -2  -5   84.04    3.02 
  -3   2   5   90.00    3.02 
  -3   2   5   82.85    3.07 
  -3   2   5   86.99    3.05 
  -3   2   5   81.46    3.02 
   2  -2  -5    0.15    0.04 
   2  -2  -5    0.06    0.05 
   2  -2  -5    0.03    0.03 
  -2   2   5    0.12    0.03 
  -2   2   5    0.03    0.04 
  -2   2   5    0.04    0.03 
  -2   2   5    0.03    0.04 
   1  -2  -5    0.08    0.03 
   1  -2  -5    0.11    0.04 
   1  -2  -5    0.10    0.03 
  -1   2   5    0.12    0.04 
  -1   2   5    0.08    0.03 
  -1   2   5    0.13    0.05 
   0  -2  -5    8.28    0.35 
   0  -2  -5    8.56    0.33 
   0  -2  -5    9.01    0.33 
   0  -2  -5    8.31    0.33 
   0  -2  -5    8.32    0.34 
   0   2   5    8.64    0.34 
   0   2   5    8.98    0.34 
   0   2   5    8.65    0.35 
  -1  -2  -5   13.35    0.51 
  -1  -2  -5   13.87    0.51 
  -1  -2  -5   13.64    0.50 
  -1  -2  -5   12.89    0.51 
   1   2   5   13.87    0.50 
   1   2   5   13.12    0.49 
   1   2   5   13.15    0.49 
   1   2   5   13.82    0.52 
  -2  -2  -5  216.47    7.41 
  -2  -2  -5  214.17    7.39 
  -2  -2  -5  205.98    7.42 
  -2  -2  -5  206.83    7.40 
   2   2   5  213.71    7.41 
   2   2   5  211.09    7.38 
   2   2   5  205.19    7.41 
  -3  -2  -5  200.03    6.89 
  -3  -2  -5  190.08    6.86 
  -3  -2  -5  190.41    6.85 
  -3  -2  -5  195.08    6.89 
   3   2   5  199.12    6.88 
  -4  -2  -5   15.53    0.61 
  -4  -2  -5   16.30    0.66 
  -4  -2  -5   15.53    0.60 
  -4  -2  -5   16.45    0.62 
   4   2   5   15.57    0.63 
   4   2   5   15.92    0.61 
  -5  -2  -5   39.47    1.42 
  -5  -2  -5   39.34    1.45 
  -5  -2  -5   38.69    1.49 
  -5  -2  -5   38.07    1.44 
   5   2   5   39.86    1.46 
   5   2   5   39.49    1.44 
  -6  -2  -5   12.31    0.53 
  -6  -2  -5   11.32    0.51 
  -6  -2  -5   12.35    0.49 
   6   2   5   12.31    0.53 
   6   2   5   12.25    0.51 
  -7  -2  -5    4.98    0.34 
  -7  -2  -5    4.95    0.25 
  -7  -2  -5    4.62    0.29 
   7   2   5    5.00    0.28 
   7   2   5    4.53    0.26 
  -8  -2  -5    5.45    0.33 
  -8  -2  -5    5.32    0.28 
  -8  -2  -5    4.96    0.36 
   8   2   5    5.29    0.31 
   8   2   5    5.33    0.30 
  -9  -2  -5    2.37    0.24 
  -9  -2  -5    2.45    0.27 
  -9  -2  -5    2.48    0.20 
   9   2   5    2.67    0.21 
   9   2   5    2.82    0.23 
 -10  -2  -5    3.03    0.27 
 -10  -2  -5    2.82    0.22 
 -10  -2  -5    2.70    0.32 
  10   2   5    2.45    0.23 
 -11  -2  -5    0.39    0.14 
 -11  -2  -5    0.26    0.11 
 -11  -2  -5    0.43    0.18 
  11   2   5    0.28    0.11 
 -12  -2  -5    2.12    0.33 
 -12  -2  -5    1.96    0.23 
  12   2   5    2.43    0.25 
  10  -3  -5    2.64    0.31 
 -10   3   5    2.62    0.22 
   9  -3  -5   13.22    0.69 
  -9   3   5   13.05    0.71 
  -9   3   5   13.63    0.58 
   8  -3  -5   13.96    0.67 
  -8   3   5   13.16    0.70 
  -8   3   5   13.59    0.57 
   7  -3  -5    4.14    0.30 
  -7   3   5    3.89    0.23 
  -7   3   5    4.09    0.34 
   6  -3  -5    6.37    0.38 
  -6   3   5    6.25    0.40 
  -6   3   5    7.03    0.35 
  -6   3   5    6.12    0.30 
  -6   3   5    6.54    0.36 
   5  -3  -5   -0.01    0.07 
  -5   3   5    0.10    0.05 
  -5   3   5    0.01    0.06 
  -5   3   5    0.02    0.05 
  -5   3   5   -0.02    0.05 
  -5   3   5    0.04    0.10 
   4  -3  -5    2.66    0.20 
   4  -3  -5    2.56    0.17 
  -4   3   5    3.01    0.16 
  -4   3   5    2.72    0.18 
  -4   3   5    2.41    0.22 
  -4   3   5    2.92    0.18 
  -4   3   5    3.15    0.17 
   3  -3  -5    0.28    0.07 
   3  -3  -5    0.17    0.05 
   3  -3  -5    0.26    0.05 
  -3   3   5    0.21    0.05 
  -3   3   5    0.22    0.06 
  -3   3   5    0.27    0.05 
  -3   3   5    0.28    0.09 
  -3   3   5    0.23    0.06 
   2  -3  -5  176.90    6.05 
   2  -3  -5  184.02    6.09 
   2  -3  -5  175.59    6.06 
  -2   3   5  167.26    6.07 
  -2   3   5  181.42    6.04 
  -2   3   5  170.33    6.03 
  -2   3   5  147.43    6.07 
   1  -3  -5    7.72    0.33 
   1  -3  -5    7.37    0.30 
  -1   3   5    7.05    0.30 
  -1   3   5    8.08    0.33 
  -1   3   5    8.01    0.33 
  -1   3   5    7.98    0.33 
  -1   3   5    7.63    0.28 
   0  -3  -5    8.07    0.29 
   0  -3  -5    7.46    0.28 
   0  -3  -5    7.52    0.30 
   0  -3  -5    7.30    0.31 
   0   3   5    7.73    0.31 
   0   3   5    6.74    0.28 
   0   3   5    7.74    0.30 
   0   3   5    7.87    0.29 
  -1  -3  -5   81.94    3.30 
  -1  -3  -5   97.82    3.30 
  -1  -3  -5   97.77    3.32 
   1   3   5   96.83    3.29 
   1   3   5   95.35    3.29 
   1   3   5   92.19    3.32 
  -2  -3  -5   82.84    2.95 
  -2  -3  -5   80.78    2.92 
  -2  -3  -5   79.59    2.90 
   2   3   5   81.48    2.94 
   2   3   5   84.75    2.90 
   2   3   5   82.92    2.91 
   2   3   5   86.29    2.91 
  -3  -3  -5    8.91    0.35 
  -3  -3  -5    8.66    0.39 
  -3  -3  -5    8.91    0.34 
   3   3   5    8.53    0.33 
   3   3   5    8.99    0.37 
   3   3   5    9.02    0.33 
   3   3   5    8.92    0.36 
  -4  -3  -5   15.31    0.59 
  -4  -3  -5   15.28    0.64 
  -4  -3  -5   14.75    0.58 
   4   3   5   15.34    0.60 
   4   3   5   15.09    0.56 
   4   3   5   15.54    0.59 
  -5  -3  -5    0.71    0.10 
  -5  -3  -5    0.58    0.08 
  -5  -3  -5    0.80    0.15 
   5   3   5    0.59    0.06 
   5   3   5    0.63    0.08 
   5   3   5    0.76    0.09 
  -6  -3  -5    3.39    0.22 
  -6  -3  -5    3.86    0.20 
  -6  -3  -5    3.46    0.26 
   6   3   5    3.79    0.22 
   6   3   5    3.49    0.21 
  -7  -3  -5   12.36    0.52 
  -7  -3  -5   12.95    0.62 
  -7  -3  -5   12.39    0.57 
   7   3   5   12.11    0.54 
   7   3   5   13.10    0.56 
  -8  -3  -5   66.77    2.54 
  -8  -3  -5   67.27    2.43 
  -8  -3  -5   65.95    2.49 
   8   3   5   67.71    2.46 
   8   3   5   66.34    2.48 
  -9  -3  -5   11.11    0.62 
  -9  -3  -5   11.93    0.58 
  -9  -3  -5   11.60    0.51 
   9   3   5   12.16    0.57 
   9   3   5   11.03    0.54 
 -10  -3  -5    0.10    0.08 
 -10  -3  -5    0.39    0.18 
 -10  -3  -5    0.08    0.12 
  10   3   5    0.22    0.11 
  10   3   5    0.13    0.09 
 -11  -3  -5    0.80    0.23 
 -11  -3  -5    0.50    0.12 
 -11  -3  -5    0.86    0.18 
  11   3   5    0.88    0.16 
 -12  -3  -5    3.47    0.40 
 -12  -3  -5    3.38    0.27 
 -12  -3  -5    3.24    0.38 
  12   3   5    3.19    0.28 
  10  -4  -5    4.51    0.37 
 -10   4   5    4.52    0.26 
   9  -4  -5    6.69    0.44 
  -9   4   5    6.36    0.32 
  -9   4   5    6.32    0.44 
   8  -4  -5    0.84    0.17 
  -8   4   5    0.84    0.12 
  -8   4   5    0.89    0.18 
   7  -4  -5   10.31    0.53 
  -7   4   5   10.18    0.50 
  -7   4   5    9.91    0.43 
  -7   4   5   10.56    0.55 
   6  -4  -5    3.80    0.27 
  -6   4   5    3.70    0.29 
  -6   4   5    3.96    0.25 
  -6   4   5    3.52    0.20 
   5  -4  -5    1.02    0.14 
  -5   4   5    0.89    0.15 
  -5   4   5    0.94    0.12 
  -5   4   5    0.92    0.10 
   4  -4  -5   11.51    0.53 
   4  -4  -5   11.68    0.48 
  -4   4   5   12.39    0.52 
  -4   4   5   11.44    0.46 
  -4   4   5   12.14    0.54 
  -4   4   5   12.14    0.47 
   3  -4  -5   92.25    3.20 
   3  -4  -5   87.18    3.14 
  -3   4   5   89.86    3.12 
  -3   4   5   76.91    3.17 
  -3   4   5   91.36    3.17 
  -3   4   5   83.16    3.11 
  -3   4   5   91.98    3.19 
  -3   4   5   94.61    3.12 
   2  -4  -5    3.76    0.21 
   2  -4  -5    3.70    0.18 
  -2   4   5    4.03    0.16 
  -2   4   5    3.98    0.20 
  -2   4   5    3.86    0.20 
  -2   4   5    3.81    0.21 
  -2   4   5    3.86    0.16 
   1  -4  -5    6.56    0.26 
   1  -4  -5    6.19    0.29 
  -1   4   5    6.22    0.27 
  -1   4   5    6.51    0.23 
  -1   4   5    6.65    0.28 
   0  -4  -5    0.07    0.03 
   0  -4  -5    0.09    0.03 
   0  -4  -5    0.15    0.02 
   0  -4  -5    0.12    0.03 
   0   4   5    0.20    0.03 
   0   4   5    0.13    0.03 
  -1  -4  -5   20.24    0.78 
  -1  -4  -5   22.22    0.77 
  -1  -4  -5   21.60    0.80 
   1   4   5   21.34    0.79 
  -2  -4  -5    0.15    0.03 
  -2  -4  -5    0.11    0.05 
   2   4   5    0.16    0.03 
  -3  -4  -5   50.54    1.75 
  -3  -4  -5   45.91    1.74 
  -3  -4  -5   52.44    1.80 
   3   4   5   50.20    1.75 
   3   4   5   46.10    1.77 
  -4  -4  -5   16.41    0.65 
  -4  -4  -5   18.18    0.70 
  -4  -4  -5   16.43    0.63 
   4   4   5   16.86    0.66 
   4   4   5   16.28    0.65 
  -5  -4  -5    5.97    0.26 
  -5  -4  -5    5.92    0.33 
  -5  -4  -5    5.71    0.29 
   5   4   5    5.93    0.28 
   5   4   5    5.88    0.28 
  -6  -4  -5   73.37    2.65 
  -6  -4  -5   70.77    2.56 
  -6  -4  -5   70.10    2.60 
   6   4   5   71.30    2.58 
   6   4   5   71.83    2.51 
   6   4   5   70.55    2.59 
  -7  -4  -5   52.71    2.02 
  -7  -4  -5   52.00    1.97 
  -7  -4  -5   53.24    1.91 
   7   4   5   52.17    1.95 
   7   4   5   51.83    1.94 
  -8  -4  -5   14.53    0.72 
  -8  -4  -5   14.30    0.67 
  -8  -4  -5   15.22    0.61 
   8   4   5   14.71    0.66 
   8   4   5   15.19    0.64 
  -9  -4  -5    1.52    0.24 
  -9  -4  -5    0.97    0.15 
  -9  -4  -5    1.17    0.20 
   9   4   5    1.20    0.15 
   9   4   5    1.19    0.17 
 -10  -4  -5    3.67    0.26 
 -10  -4  -5    3.83    0.32 
 -10  -4  -5    3.20    0.36 
  10   4   5    3.80    0.29 
  10   4   5    4.07    0.28 
 -11  -4  -5    1.38    0.24 
 -11  -4  -5    1.19    0.17 
 -11  -4  -5    1.01    0.23 
  11   4   5    1.49    0.20 
 -12  -4  -5    2.80    0.36 
 -12  -4  -5    2.28    0.31 
 -12  -4  -5    2.47    0.25 
  12   4   5    2.88    0.26 
   9  -5  -5    4.02    0.35 
  -9   5   5    3.53    0.20 
  -9   5   5    4.06    0.34 
   8  -5  -5    9.91    0.54 
  -8   5   5    9.66    0.54 
  -8   5   5    9.75    0.40 
   7  -5  -5    0.26    0.11 
  -7   5   5    0.37    0.13 
  -7   5   5    0.24    0.05 
  -7   5   5    0.22    0.10 
   6  -5  -5    2.20    0.21 
  -6   5   5    2.11    0.22 
  -6   5   5    2.32    0.19 
  -6   5   5    2.36    0.13 
   5  -5  -5   21.80    0.93 
  -5   5   5   22.77    0.93 
  -5   5   5   22.70    0.91 
  -5   5   5   23.05    0.82 
   4  -5  -5    3.47    0.18 
  -4   5   5    2.90    0.21 
  -4   5   5    3.46    0.21 
  -4   5   5    2.99    0.13 
   3  -5  -5    0.09    0.06 
   3  -5  -5    0.06    0.04 
  -3   5   5    0.02    0.04 
  -3   5   5    0.01    0.05 
  -3   5   5    0.08    0.02 
   2  -5  -5    2.14    0.15 
   2  -5  -5    2.12    0.12 
  -2   5   5    2.24    0.14 
  -2   5   5    2.12    0.14 
   1  -5  -5    6.73    0.29 
   1  -5  -5    6.41    0.25 
  -1   5   5    6.56    0.28 
  -1   5   5    5.80    0.27 
  -1   5   5    6.24    0.27 
   0  -5  -5    1.85    0.12 
   0  -5  -5    1.68    0.08 
   0  -5  -5    1.88    0.09 
   0   5   5    1.76    0.09 
   0   5   5    1.82    0.11 
  -1  -5  -5    5.40    0.21 
  -1  -5  -5    5.14    0.24 
  -1  -5  -5    5.81    0.23 
  -1  -5  -5    5.38    0.21 
   1   5   5    4.89    0.22 
  -2  -5  -5   37.48    1.36 
  -2  -5  -5   37.89    1.35 
  -2  -5  -5   42.40    1.41 
   2   5   5   39.00    1.38 
   2   5   5   34.83    1.38 
  -3  -5  -5    4.25    0.24 
  -3  -5  -5    4.24    0.20 
  -3  -5  -5    4.47    0.18 
   3   5   5    4.61    0.20 
  -4  -5  -5   23.50    0.89 
  -4  -5  -5   22.81    0.94 
  -4  -5  -5   23.83    0.86 
   4   5   5   24.23    0.89 
   4   5   5   23.82    0.90 
  -5  -5  -5   25.15    1.01 
  -5  -5  -5   25.16    0.92 
  -5  -5  -5   24.62    0.96 
   5   5   5   23.72    0.95 
   5   5   5   26.07    0.95 
  -6  -5  -5   26.44    0.99 
  -6  -5  -5   25.85    1.09 
  -6  -5  -5   27.23    1.05 
   6   5   5   26.52    1.03 
   6   5   5   27.19    1.03 
  -7  -5  -5    0.08    0.09 
  -7  -5  -5   -0.09    0.10 
  -7  -5  -5   -0.01    0.05 
   7   5   5    0.06    0.06 
   7   5   5    0.06    0.06 
  -8  -5  -5    0.04    0.11 
  -8  -5  -5   -0.04    0.10 
  -8  -5  -5    0.05    0.06 
   8   5   5    0.16    0.08 
   8   5   5    0.03    0.06 
  -9  -5  -5    0.24    0.08 
  -9  -5  -5    0.04    0.13 
  -9  -5  -5    0.22    0.13 
   9   5   5    0.25    0.10 
   9   5   5    0.12    0.09 
 -10  -5  -5    2.53    0.23 
 -10  -5  -5    2.29    0.28 
 -10  -5  -5    2.29    0.31 
  10   5   5    2.84    0.24 
  10   5   5    2.77    0.25 
 -11  -5  -5    3.72    0.34 
 -11  -5  -5    3.36    0.27 
 -11  -5  -5    3.78    0.41 
  11   5   5    3.72    0.31 
  11   5   5    3.70    0.30 
 -12  -5  -5    0.00    0.10 
 -12  -5  -5    0.14    0.20 
 -12  -5  -5    0.04    0.14 
  12   5   5    0.09    0.11 
   9  -6  -5    4.66    0.38 
  -9   6   5    4.41    0.35 
   8  -6  -5    0.11    0.10 
  -8   6   5    0.25    0.12 
  -8   6   5    0.24    0.11 
   7  -6  -5    7.94    0.47 
  -7   6   5    8.32    0.46 
  -7   6   5    8.56    0.44 
   6  -6  -5    1.43    0.19 
  -6   6   5    0.90    0.17 
  -6   6   5    1.18    0.15 
   5  -6  -5    0.16    0.08 
  -5   6   5    0.03    0.06 
  -5   6   5    0.07    0.07 
   4  -6  -5   13.15    0.53 
   4  -6  -5   13.08    0.58 
  -4   6   5   13.38    0.56 
  -4   6   5   12.96    0.57 
   3  -6  -5    0.19    0.07 
   3  -6  -5    0.13    0.04 
  -3   6   5    0.09    0.06 
  -3   6   5    0.10    0.05 
   2  -6  -5    0.70    0.06 
   2  -6  -5    0.67    0.09 
  -2   6   5    0.82    0.09 
  -2   6   5    0.69    0.08 
   1  -6  -5   78.02    2.66 
   1  -6  -5   72.40    2.72 
  -1   6   5   76.07    2.69 
  -1   6   5   75.68    2.70 
   0  -6  -5   94.08    3.09 
   0  -6  -5   83.33    3.04 
   0   6   5   81.69    3.05 
   0   6   5   87.69    3.05 
   0   6   5   84.52    3.05 
  -1  -6  -5    1.56    0.11 
  -1  -6  -5    1.76    0.11 
  -1  -6  -5    1.83    0.09 
   1   6   5    1.67    0.09 
   1   6   5    1.78    0.09 
  -2  -6  -5    1.02    0.10 
  -2  -6  -5    1.22    0.08 
   2   6   5    1.34    0.08 
   2   6   5    1.22    0.07 
  -3  -6  -5   11.24    0.44 
  -3  -6  -5   10.02    0.46 
   3   6   5   11.39    0.42 
   3   6   5   10.74    0.42 
  -4  -6  -5    5.41    0.29 
  -4  -6  -5    5.86    0.27 
   4   6   5    4.55    0.23 
   4   6   5    5.68    0.26 
   4   6   5    5.66    0.25 
  -5  -6  -5   18.38    0.79 
  -5  -6  -5   19.65    0.76 
   5   6   5   18.53    0.73 
   5   6   5   18.12    0.74 
  -6  -6  -5    1.45    0.20 
  -6  -6  -5    2.17    0.19 
   6   6   5    1.68    0.14 
   6   6   5    1.52    0.14 
  -7  -6  -5    1.39    0.19 
  -7  -6  -5    1.42    0.23 
   7   6   5    1.32    0.15 
   7   6   5    1.45    0.15 
  -8  -6  -5    6.13    0.42 
  -8  -6  -5    6.09    0.38 
   8   6   5    6.18    0.34 
   8   6   5    6.35    0.35 
  -9  -6  -5    0.76    0.17 
  -9  -6  -5    0.70    0.20 
   9   6   5    0.94    0.16 
   9   6   5    1.02    0.15 
 -10  -6  -5    0.32    0.20 
 -10  -6  -5    0.60    0.17 
  10   6   5    0.32    0.11 
  10   6   5    0.42    0.11 
 -11  -6  -5    2.70    0.32 
 -11  -6  -5    2.72    0.36 
  11   6   5    3.02    0.27 
  11   6   5    2.22    0.25 
   9  -7  -5    1.79    0.26 
   8  -7  -5    0.04    0.11 
  -8   7   5    0.00    0.09 
  -8   7   5    0.02    0.10 
   7  -7  -5    1.93    0.23 
  -7   7   5    1.67    0.22 
  -7   7   5    1.93    0.20 
   6  -7  -5   15.92    0.75 
  -6   7   5   17.11    0.73 
  -6   7   5   16.71    0.74 
   5  -7  -5    9.92    0.51 
  -5   7   5   11.63    0.51 
  -5   7   5   10.32    0.49 
   4  -7  -5    8.33    0.44 
  -4   7   5    8.75    0.42 
  -4   7   5    9.57    0.42 
   3  -7  -5   28.56    1.08 
  -3   7   5   26.36    1.04 
  -3   7   5   27.26    1.05 
   2  -7  -5   98.79    3.61 
  -2   7   5  102.25    3.59 
  -2   7   5  100.70    3.59 
   1  -7  -5   47.99    1.69 
   1  -7  -5   40.67    1.63 
  -1   7   5   44.41    1.65 
  -1   7   5   47.89    1.65 
  -1   7   5   48.29    1.66 
   0  -7  -5   10.35    0.42 
   0  -7  -5    8.86    0.39 
   0   7   5    9.71    0.38 
   0   7   5    9.74    0.39 
   0   7   5   10.18    0.39 
   0   7   5   10.00    0.38 
  -1  -7  -5    5.18    0.23 
  -1  -7  -5    5.02    0.24 
  -1  -7  -5    5.48    0.25 
   1   7   5    5.31    0.21 
   1   7   5    5.20    0.22 
  -2  -7  -5    5.40    0.27 
  -2  -7  -5    5.71    0.25 
   2   7   5    5.47    0.23 
   2   7   5    6.20    0.23 
  -3  -7  -5    0.67    0.11 
  -3  -7  -5    0.66    0.08 
   3   7   5    0.56    0.06 
   3   7   5    0.65    0.06 
  -4  -7  -5   23.20    0.90 
  -4  -7  -5   23.10    0.93 
   4   7   5   23.97    0.86 
   4   7   5   22.53    0.87 
  -5  -7  -5   37.20    1.44 
  -5  -7  -5   38.91    1.49 
   5   7   5   39.27    1.43 
   5   7   5   37.35    1.41 
  -6  -7  -5   -0.08    0.09 
  -6  -7  -5   -0.02    0.07 
   6   7   5    0.01    0.04 
   6   7   5   -0.02    0.05 
  -7  -7  -5    1.25    0.19 
  -7  -7  -5    1.40    0.22 
   7   7   5    1.24    0.14 
   7   7   5    1.07    0.13 
  -8  -7  -5    6.71    0.46 
  -8  -7  -5    6.63    0.42 
   8   7   5    6.99    0.37 
   8   7   5    6.75    0.37 
  -9  -7  -5    0.66    0.17 
  -9  -7  -5    0.27    0.16 
   9   7   5    0.73    0.13 
   9   7   5    0.97    0.15 
 -10  -7  -5    3.75    0.40 
 -10  -7  -5    3.57    0.34 
  10   7   5    3.46    0.28 
  10   7   5    4.49    0.31 
 -11  -7  -5    1.45    0.27 
 -11  -7  -5    1.35    0.29 
  11   7   5    1.30    0.22 
  11   7   5    1.45    0.20 
   8  -8  -5    0.89    0.19 
  -8   8   5    1.26    0.20 
  -8   8   5    1.25    0.21 
   7  -8  -5    5.79    0.40 
  -7   8   5    5.87    0.37 
  -7   8   5    6.92    0.40 
   6  -8  -5   17.71    0.80 
  -6   8   5   18.22    0.77 
  -6   8   5   16.92    0.77 
   5  -8  -5    0.26    0.10 
  -5   8   5    0.18    0.08 
  -5   8   5    0.29    0.09 
   4  -8  -5   31.32    1.24 
  -4   8   5   30.00    1.21 
  -4   8   5   32.54    1.20 
   3  -8  -5    9.23    0.45 
  -3   8   5   10.20    0.42 
  -3   8   5    9.06    0.42 
   2  -8  -5    0.63    0.10 
  -2   8   5    0.77    0.09 
   1  -8  -5    2.58    0.17 
  -1   8   5    2.52    0.14 
  -1   8   5    2.33    0.15 
  -1   8   5    2.72    0.15 
   0  -8  -5    9.13    0.38 
   0  -8  -5    9.36    0.40 
   0   8   5    8.94    0.36 
   0   8   5    9.31    0.36 
  -1  -8  -5   25.14    0.95 
  -1  -8  -5   24.66    0.95 
  -1  -8  -5   26.20    0.94 
   1   8   5   24.70    0.90 
   1   8   5   24.10    0.90 
  -2  -8  -5   32.54    1.26 
  -2  -8  -5   34.85    1.24 
  -2  -8  -5   31.93    1.24 
   2   8   5   34.02    1.20 
   2   8   5   33.83    1.19 
  -3  -8  -5   21.26    0.82 
  -3  -8  -5   20.98    0.85 
   3   8   5   19.66    0.77 
   3   8   5   22.14    0.77 
  -4  -8  -5   14.71    0.62 
  -4  -8  -5   14.64    0.65 
   4   8   5   15.11    0.56 
   4   8   5   14.64    0.57 
  -5  -8  -5    0.42    0.10 
  -5  -8  -5    0.49    0.12 
   5   8   5    0.31    0.07 
   5   8   5    0.29    0.06 
  -6  -8  -5   13.81    0.63 
  -6  -8  -5   14.30    0.67 
   6   8   5   14.06    0.60 
   6   8   5   14.12    0.58 
  -7  -8  -5    4.46    0.34 
  -7  -8  -5    4.12    0.30 
   7   8   5    3.67    0.24 
   7   8   5    3.83    0.25 
  -8  -8  -5    1.98    0.25 
  -8  -8  -5    2.28    0.29 
   8   8   5    1.85    0.19 
   8   8   5    1.89    0.18 
  -9  -8  -5   12.21    0.69 
  -9  -8  -5   12.14    0.65 
   9   8   5   12.02    0.57 
   9   8   5   12.04    0.57 
 -10  -8  -5    0.76    0.19 
 -10  -8  -5    0.87    0.23 
  10   8   5    1.21    0.18 
  10   8   5    0.57    0.13 
 -11  -8  -5   -0.33    0.18 
 -11  -8  -5    0.05    0.16 
  11   8   5    0.02    0.10 
  11   8   5   -0.06    0.08 
   8  -9  -5   10.91    0.61 
  -8   9   5   10.82    0.58 
  -8   9   5   11.76    0.60 
   7  -9  -5    0.36    0.14 
  -7   9   5    0.19    0.10 
  -7   9   5    0.37    0.12 
   6  -9  -5   -0.10    0.09 
  -6   9   5    0.00    0.07 
  -6   9   5    0.07    0.08 
   5  -9  -5    0.22    0.12 
  -5   9   5    0.42    0.10 
  -5   9   5    0.47    0.10 
   4  -9  -5    0.38    0.11 
  -4   9   5    0.48    0.09 
  -4   9   5    0.51    0.10 
   3  -9  -5    2.80    0.21 
  -3   9   5    2.68    0.19 
  -3   9   5    2.99    0.19 
   2  -9  -5    0.05    0.06 
  -2   9   5    0.12    0.05 
  -2   9   5    0.06    0.04 
   1  -9  -5   49.45    1.90 
  -1   9   5   54.81    1.87 
  -1   9   5   50.69    1.89 
   0  -9  -5    0.21    0.06 
   0  -9  -5    0.22    0.06 
   0   9   5    0.23    0.04 
   0   9   5    0.16    0.04 
  -1  -9  -5   21.53    0.80 
  -1  -9  -5   20.30    0.79 
  -1  -9  -5   20.26    0.80 
   1   9   5   20.88    0.74 
   1   9   5   18.49    0.73 
  -2  -9  -5   24.17    0.94 
  -2  -9  -5   24.56    0.93 
  -2  -9  -5   25.49    0.96 
   2   9   5   24.22    0.87 
   2   9   5   23.47    0.87 
  -3  -9  -5    9.06    0.45 
  -3  -9  -5    9.25    0.42 
   3   9   5    9.30    0.36 
   3   9   5    9.54    0.36 
  -4  -9  -5    5.08    0.30 
  -4  -9  -5    4.69    0.28 
   4   9   5    5.55    0.22 
   4   9   5    4.65    0.22 
  -5  -9  -5    0.52    0.13 
  -5  -9  -5    0.86    0.14 
   5   9   5    0.55    0.08 
  -6  -9  -5    4.04    0.31 
  -6  -9  -5    3.70    0.27 
   6   9   5    3.34    0.22 
   6   9   5    3.65    0.21 
  -7  -9  -5   11.68    0.63 
  -7  -9  -5   12.70    0.61 
   7   9   5   12.30    0.54 
   7   9   5   12.94    0.56 
  -8  -9  -5    7.62    0.46 
  -8  -9  -5    7.09    0.49 
   8   9   5    7.82    0.41 
   8   9   5    8.42    0.41 
  -9  -9  -5    1.21    0.22 
  -9  -9  -5    0.95    0.24 
   9   9   5    0.75    0.14 
   9   9   5    1.14    0.18 
 -10  -9  -5    0.14    0.15 
 -10  -9  -5    0.10    0.19 
  10   9   5    0.09    0.09 
  10   9   5   -0.10    0.08 
 -11  -9  -5    0.57    0.25 
  11   9   5    0.37    0.13 
  11   9   5    0.27    0.12 
   7 -10  -5    1.72    0.24 
  -7  10   5    2.40    0.24 
  -7  10   5    1.67    0.22 
   6 -10  -5    4.54    0.34 
  -6  10   5    4.71    0.32 
  -6  10   5    4.82    0.31 
   5 -10  -5   -0.05    0.08 
  -5  10   5    0.03    0.07 
  -5  10   5    0.04    0.07 
   4 -10  -5   19.24    0.82 
  -4  10   5   18.52    0.79 
  -4  10   5   18.84    0.78 
   3 -10  -5   23.26    0.96 
  -3  10   5   23.01    0.92 
  -3  10   5   24.16    0.94 
   2 -10  -5    2.07    0.18 
  -2  10   5    2.07    0.15 
  -2  10   5    1.98    0.16 
   1 -10  -5   20.30    0.82 
  -1  10   5   20.29    0.77 
   0 -10  -5    3.11    0.20 
   0 -10  -5    3.09    0.20 
   0  10   5    3.31    0.16 
   0  10   5    3.55    0.16 
  -1 -10  -5    7.33    0.36 
  -1 -10  -5    7.04    0.36 
  -1 -10  -5    7.56    0.35 
   1  10   5    7.55    0.29 
   1  10   5    7.31    0.28 
   1  10   5    7.49    0.29 
  -2 -10  -5   28.95    1.09 
  -2 -10  -5   28.30    1.07 
  -2 -10  -5   27.38    1.05 
   2  10   5   25.39    0.98 
   2  10   5   27.91    0.98 
  -3 -10  -5    7.75    0.37 
  -3 -10  -5    7.61    0.39 
   3  10   5    6.97    0.29 
   3  10   5    7.39    0.29 
  -4 -10  -5    1.78    0.17 
  -4 -10  -5    1.68    0.19 
   4  10   5    1.54    0.10 
  -5 -10  -5    8.79    0.46 
  -5 -10  -5   10.00    0.51 
   5  10   5    9.19    0.39 
  -6 -10  -5   12.46    0.62 
  -6 -10  -5   11.50    0.57 
   6  10   5   10.64    0.48 
   6  10   5   12.07    0.52 
  -7 -10  -5    0.45    0.16 
  -7 -10  -5    0.36    0.14 
   7  10   5    0.37    0.09 
   7  10   5    0.50    0.09 
  -8 -10  -5    3.33    0.31 
  -8 -10  -5    3.45    0.35 
   8  10   5    4.05    0.25 
   8  10   5    3.43    0.26 
  -9 -10  -5    0.42    0.20 
  -9 -10  -5    0.21    0.15 
   9  10   5    0.22    0.09 
   9  10   5    0.47    0.12 
 -10 -10  -5    0.70    0.24 
  10  10   5    0.47    0.13 
  10  10   5    0.58    0.13 
   7 -11  -5    3.59    0.32 
  -7  11   5    3.57    0.29 
  -7  11   5    3.52    0.33 
   6 -11  -5    1.38    0.22 
  -6  11   5    2.14    0.21 
  -6  11   5    1.98    0.21 
   5 -11  -5    9.58    0.52 
  -5  11   5    9.76    0.50 
  -5  11   5   10.83    0.50 
   4 -11  -5    2.87    0.25 
  -4  11   5    2.65    0.22 
  -4  11   5    2.49    0.21 
   3 -11  -5    0.70    0.13 
  -3  11   5    0.72    0.13 
  -3  11   5    0.82    0.12 
   2 -11  -5    3.10    0.22 
  -2  11   5    2.98    0.19 
  -2  11   5    3.28    0.22 
   1 -11  -5    6.86    0.34 
  -1  11   5    5.74    0.28 
   0 -11  -5    5.69    0.30 
   0 -11  -5    6.34    0.31 
   0  11   5    5.40    0.24 
  -1 -11  -5   12.97    0.54 
  -1 -11  -5   12.97    0.56 
  -1 -11  -5   13.19    0.56 
   1  11   5   11.69    0.46 
   1  11   5   12.09    0.46 
  -2 -11  -5   16.88    0.70 
  -2 -11  -5   16.24    0.68 
  -2 -11  -5   16.37    0.66 
   2  11   5   14.77    0.57 
  -3 -11  -5    4.74    0.29 
  -3 -11  -5    5.08    0.27 
  -3 -11  -5    4.66    0.31 
   3  11   5    4.95    0.20 
   3  11   5    5.49    0.21 
  -4 -11  -5    0.05    0.06 
  -4 -11  -5   -0.01    0.08 
   4  11   5    0.05    0.03 
  -5 -11  -5   11.63    0.57 
  -5 -11  -5   12.21    0.60 
   5  11   5   11.37    0.47 
  -6 -11  -5    8.91    0.49 
  -6 -11  -5   10.01    0.54 
   6  11   5    8.39    0.39 
  -7 -11  -5    3.43    0.31 
  -7 -11  -5    3.44    0.34 
   7  11   5    3.63    0.22 
   7  11   5    3.75    0.25 
  -8 -11  -5    2.23    0.29 
  -8 -11  -5    2.84    0.32 
   8  11   5    2.92    0.24 
   8  11   5    2.57    0.21 
  -9 -11  -5    0.27    0.17 
   9  11   5    0.24    0.09 
   9  11   5    0.14    0.09 
 -10 -11  -5    4.98    0.49 
  10  11   5    4.83    0.34 
  10  11   5    5.55    0.35 
  -6  12   5    0.40    0.11 
  -6  12   5    0.36    0.11 
   5 -12  -5    0.93    0.17 
  -5  12   5    1.39    0.18 
  -5  12   5    0.89    0.16 
   4 -12  -5    7.68    0.43 
  -4  12   5    6.92    0.40 
  -4  12   5    7.53    0.39 
   3 -12  -5   18.35    0.75 
  -3  12   5   17.87    0.74 
  -3  12   5   14.70    0.69 
   2 -12  -5    0.13    0.08 
  -2  12   5   -0.01    0.05 
   1 -12  -5    8.93    0.44 
  -1  12   5    9.17    0.38 
   0 -12  -5   12.94    0.60 
   0 -12  -5   12.83    0.58 
   0  12   5   13.86    0.51 
  -1 -12  -5    1.74    0.17 
  -1 -12  -5    2.01    0.17 
  -1 -12  -5    2.32    0.20 
   1  12   5    2.30    0.11 
   1  12   5    2.03    0.10 
  -2 -12  -5   -0.05    0.05 
  -2 -12  -5    0.01    0.06 
  -2 -12  -5    0.09    0.08 
  -3 -12  -5    6.02    0.31 
  -3 -12  -5    5.95    0.34 
  -3 -12  -5    6.06    0.36 
   3  12   5    5.78    0.23 
  -4 -12  -5    3.71    0.27 
  -4 -12  -5    3.67    0.29 
   4  12   5    3.45    0.16 
  -5 -12  -5   14.71    0.72 
  -5 -12  -5   13.85    0.68 
   5  12   5   14.85    0.57 
  -6 -12  -5   16.25    0.78 
  -6 -12  -5   16.40    0.81 
   6  12   5   16.55    0.66 
  -7 -12  -5    4.45    0.39 
   7  12   5    5.02    0.27 
  -8 -12  -5    0.18    0.17 
   8  12   5    0.35    0.09 
   8  12   5    0.36    0.10 
  -9 -12  -5    0.26    0.18 
   9  12   5    0.31    0.11 
   9  12   5    0.28    0.10 
  -5  13   5    4.03    0.30 
  -5  13   5    4.35    0.29 
  -4  13   5    3.68    0.27 
  -4  13   5    4.46    0.30 
   3 -13  -5    0.62    0.15 
  -3  13   5    0.60    0.11 
   2 -13  -5    0.07    0.08 
  -2  13   5    0.28    0.07 
   1 -13  -5    3.43    0.25 
  -1  13   5    3.33    0.19 
   0 -13  -5    2.40    0.21 
   0 -13  -5    2.65    0.21 
   0  13   5    2.63    0.14 
  -1 -13  -5    2.78    0.23 
  -1 -13  -5    3.50    0.22 
   1  13   5    2.84    0.13 
  -2 -13  -5    0.15    0.07 
  -2 -13  -5    0.35    0.11 
  -2 -13  -5    0.07    0.07 
  -3 -13  -5    0.05    0.06 
  -3 -13  -5    0.09    0.10 
  -3 -13  -5    0.11    0.08 
  -4 -13  -5   15.30    0.65 
  -4 -13  -5   15.18    0.71 
  -4 -13  -5   14.82    0.73 
   4  13   5   15.01    0.56 
  -5 -13  -5    5.61    0.41 
   5  13   5    5.79    0.26 
  -6 -13  -5    4.28    0.37 
   6  13   5    4.42    0.23 
  -7 -13  -5    0.11    0.15 
   7  13   5    0.16    0.07 
  -8 -13  -5    0.14    0.16 
   8  13   5    0.27    0.08 
  -4  14   5    0.26    0.09 
  -3  14   5    0.20    0.08 
  -2  14   5    0.17    0.07 
  -1  14   5    3.35    0.19 
   0 -14  -5    6.04    0.36 
   0  14   5    5.23    0.24 
  -1 -14  -5    0.06    0.07 
  -1 -14  -5   -0.04    0.08 
  -2 -14  -5    0.51    0.10 
  -3 -14  -5    8.05    0.48 
  -3 -14  -5    8.24    0.41 
  -4 -14  -5    1.24    0.21 
  -4 -14  -5    1.37    0.15 
  -5 -14  -5    2.18    0.28 
   5  14   5    1.91    0.12 
  -6 -14  -5    0.36    0.16 
   6  14   5    0.16    0.06 
  -7 -14  -5    0.61    0.21 
   7  14   5    0.81    0.12 
  -2  15   5    2.53    0.18 
  -1  15   5    1.83    0.13 
   0  15   5    0.97    0.08 
  -4 -15  -5    1.61    0.24 
  -5 -15  -5    0.61    0.18 
  -5 -15  -5    0.79    0.14 
   5  15   5    0.65    0.07 
   2  10  -6    0.29    0.10 
   1  10  -6    0.23    0.09 
   0  10  -6   -0.04    0.06 
  -1  10  -6    2.17    0.20 
  -2  10  -6    7.04    0.38 
  -3  10  -6    1.22    0.18 
   4   9  -6    2.51    0.23 
  -4  -9   6    2.50    0.29 
   3   9  -6    5.97    0.35 
   2   9  -6    4.29    0.28 
  -2  -9   6    4.63    0.39 
   1   9  -6    0.48    0.10 
  -1  -9   6    0.35    0.14 
   0   9  -6   10.73    0.49 
   0  -9   6    9.99    0.59 
  -1   9  -6    6.96    0.37 
   1  -9   6    7.24    0.47 
  -2   9  -6    0.43    0.10 
   2  -9   6    0.41    0.13 
  -3   9  -6    0.79    0.14 
  -3   9  -6    0.75    0.18 
   3  -9   6    0.47    0.14 
  -4   9  -6    0.08    0.09 
  -4   9  -6    0.01    0.11 
  -5   9  -6    0.11    0.10 
  -5   9  -6    0.24    0.13 
   5   8  -6    8.45    0.44 
  -5  -8   6    7.84    0.54 
   4   8  -6   11.06    0.52 
  -4  -8   6   10.04    0.63 
  -4  -8   6   10.74    0.63 
   3   8  -6    6.11    0.34 
  -3  -8   6    5.57    0.43 
   2   8  -6    5.28    0.30 
  -2  -8   6    4.52    0.38 
   1   8  -6    7.45    0.37 
  -1  -8   6    6.70    0.46 
   0   8  -6    1.66    0.16 
   0  -8   6    1.94    0.24 
  -1   8  -6    1.32    0.15 
   1  -8   6    1.47    0.21 
  -2   8  -6    0.12    0.07 
   2  -8   6    0.29    0.12 
  -3   8  -6    1.54    0.17 
  -3   8  -6    1.11    0.21 
   3  -8   6    1.11    0.19 
  -4   8  -6    1.91    0.25 
  -4   8  -6    2.05    0.20 
  -5   8  -6    8.76    0.51 
  -5   8  -6    8.13    0.45 
  -6   8  -6    2.73    0.30 
  -6   8  -6    2.23    0.24 
   6   7  -6    6.85    0.40 
  -6  -7   6    7.47    0.51 
   5   7  -6    4.60    0.30 
  -5  -7   6    5.41    0.43 
  -5  -7   6    4.50    0.38 
   4   7  -6    0.43    0.10 
  -4  -7   6    0.13    0.14 
  -4  -7   6    0.16    0.11 
   3   7  -6    4.15    0.26 
  -3  -7   6    4.14    0.35 
   2   7  -6    2.49    0.19 
  -2  -7   6    2.10    0.25 
   1   7  -6    0.99    0.13 
  -1  -7   6    0.97    0.18 
   0   7  -6   10.83    0.49 
   0  -7   6   11.10    0.58 
  -1   7  -6    0.96    0.12 
   1  -7   6    0.62    0.14 
  -2   7  -6    3.03    0.26 
  -2   7  -6    3.20    0.22 
   2  -7   6    3.45    0.27 
  -3   7  -6    7.05    0.37 
  -3   7  -6    7.28    0.43 
  -4   7  -6    7.51    0.40 
  -4   7  -6    7.80    0.45 
  -5   7  -6    0.25    0.09 
  -5   7  -6    0.00    0.09 
  -6   7  -6    0.18    0.11 
  -6   7  -6    0.08    0.09 
  -7   7  -6    0.01    0.10 
  -7   7  -6    0.18    0.12 
  -7   7  -6   -0.06    0.10 
   7   6  -6    3.08    0.27 
  -7  -6   6    3.33    0.34 
   6   6  -6   -0.02    0.07 
  -6  -6   6   -0.09    0.12 
  -6  -6   6   -0.04    0.11 
   5   6  -6   -0.01    0.07 
  -5  -6   6    0.00    0.12 
  -5  -6   6   -0.03    0.09 
   4   6  -6    0.76    0.13 
  -4  -6   6    0.50    0.14 
  -4  -6   6    0.73    0.18 
   3   6  -6    2.79    0.21 
  -3  -6   6    2.49    0.27 
   2   6  -6    7.10    0.37 
  -2  -6   6    8.24    0.46 
   1   6  -6   15.70    0.66 
  -1  -6   6   16.29    0.75 
   0   6  -6    0.67    0.10 
   0  -6   6    0.75    0.15 
  -1   6  -6    2.00    0.20 
  -1   6  -6    2.32    0.17 
   1  -6   6    2.25    0.22 
  -2   6  -6    0.80    0.11 
  -2   6  -6    0.79    0.15 
   2  -6   6    0.84    0.15 
  -3   6  -6    9.61    0.45 
  -3   6  -6   10.05    0.51 
  -4   6  -6    0.31    0.11 
  -4   6  -6    0.19    0.08 
  -5   6  -6    3.99    0.27 
  -5   6  -6    3.91    0.31 
  -6   6  -6    0.95    0.15 
  -6   6  -6    0.70    0.15 
  -6   6  -6    0.80    0.15 
  -7   6  -6    0.10    0.10 
  -7   6  -6    0.03    0.09 
  -7   6  -6    0.08    0.09 
  -8   6  -6    4.70    0.37 
  -8   6  -6    4.18    0.33 
  -8   6  -6    4.55    0.34 
   8   5  -6   -0.05    0.09 
   8   5  -6    0.08    0.11 
  -8  -5   6   -0.16    0.11 
   7   5  -6    0.44    0.12 
   7   5  -6    0.49    0.13 
  -7  -5   6    0.57    0.20 
  -7  -5   6    0.55    0.18 
   6   5  -6   13.73    0.62 
  -6  -5   6   12.91    0.69 
  -6  -5   6   13.06    0.73 
   5   5  -6    0.90    0.15 
  -5  -5   6    0.92    0.17 
  -5  -5   6    0.82    0.20 
   4   5  -6    5.29    0.29 
  -4  -5   6    5.08    0.38 
  -4  -5   6    4.59    0.33 
   3   5  -6   23.51    0.94 
  -3  -5   6   23.89    1.03 
   2   5  -6    8.72    0.41 
  -2  -5   6    9.09    0.49 
   1   5  -6    0.44    0.08 
  -1  -5   6    0.64    0.13 
   0   5  -6    0.59    0.10 
   0  -5   6    0.45    0.11 
  -1   5  -6    3.43    0.25 
  -1   5  -6    3.75    0.22 
   1  -5   6    3.90    0.26 
  -2   5  -6    4.63    0.31 
  -2   5  -6    4.94    0.26 
   2  -5   6    5.18    0.31 
  -3   5  -6   20.85    0.89 
  -3   5  -6   21.14    0.84 
  -4   5  -6   18.13    0.74 
  -4   5  -6   17.35    0.78 
  -5   5  -6    0.49    0.10 
  -5   5  -6    0.49    0.13 
  -5   5  -6    0.58    0.12 
  -6   5  -6    5.18    0.34 
  -6   5  -6    4.96    0.32 
  -6   5  -6    5.70    0.33 
  -7   5  -6    2.36    0.22 
  -7   5  -6    2.59    0.26 
  -7   5  -6    2.17    0.22 
  -8   5  -6    4.02    0.33 
  -8   5  -6    3.96    0.31 
  -8   5  -6    4.43    0.32 
  -9   5  -6    0.67    0.18 
   8   4  -6    3.59    0.30 
   8   4  -6    3.88    0.29 
  -8  -4   6    3.15    0.34 
   7   4  -6    2.82    0.26 
   7   4  -6    3.33    0.26 
  -7  -4   6    3.11    0.36 
  -7  -4   6    3.32    0.31 
   6   4  -6    1.09    0.17 
   6   4  -6    1.44    0.17 
  -6  -4   6    1.15    0.20 
  -6  -4   6    1.32    0.24 
   5   4  -6    8.74    0.44 
  -5  -4   6    8.95    0.49 
  -5  -4   6    9.07    0.53 
   4   4  -6    7.30    0.37 
   4   4  -6    7.37    0.36 
  -4  -4   6    7.13    0.41 
  -4  -4   6    6.77    0.44 
   3   4  -6    6.36    0.32 
   3   4  -6    5.96    0.30 
  -3  -4   6    5.60    0.37 
   2   4  -6    2.48    0.18 
  -2  -4   6    2.39    0.21 
   1   4  -6    0.56    0.10 
  -1  -4   6    0.53    0.11 
   0   4  -6    0.22    0.06 
   0  -4   6    0.19    0.08 
  -1   4  -6    2.62    0.19 
  -1   4  -6    1.86    0.15 
   1  -4   6    2.14    0.18 
  -2   4  -6   12.92    0.55 
  -2   4  -6   13.20    0.59 
  -3   4  -6    5.57    0.28 
  -3   4  -6    5.38    0.32 
  -4   4  -6    0.75    0.13 
  -4   4  -6    0.83    0.12 
  -5   4  -6   18.49    0.80 
  -5   4  -6   18.65    0.77 
  -5   4  -6   18.09    0.77 
  -6   4  -6    0.16    0.08 
  -6   4  -6    0.05    0.09 
  -6   4  -6    0.16    0.08 
  -7   4  -6    0.10    0.08 
  -7   4  -6    0.20    0.11 
  -7   4  -6    0.10    0.09 
  -8   4  -6    0.30    0.13 
  -8   4  -6    0.12    0.09 
  -8   4  -6    0.16    0.10 
  -9   4  -6    2.21    0.25 
  -9   4  -6    1.88    0.21 
 -10   4  -6    0.24    0.15 
   9   3  -6    6.79    0.45 
  -9  -3   6    7.40    0.41 
   8   3  -6    2.07    0.23 
   8   3  -6    2.57    0.25 
  -8  -3   6    1.57    0.30 
  -8  -3   6    2.09    0.20 
  -8  -3   6    2.09    0.27 
   7   3  -6    6.58    0.37 
   7   3  -6    5.70    0.37 
  -7  -3   6    6.03    0.41 
  -7  -3   6    6.58    0.35 
  -7  -3   6    5.62    0.46 
   6   3  -6    4.52    0.28 
   6   3  -6    3.95    0.29 
  -6  -3   6    4.10    0.26 
  -6  -3   6    4.11    0.32 
  -6  -3   6    4.22    0.35 
   5   3  -6    9.47    0.46 
   5   3  -6    9.79    0.47 
  -5  -3   6    9.31    0.50 
  -5  -3   6    9.76    0.54 
  -5  -3   6    9.84    0.44 
   4   3  -6    3.05    0.22 
  -4  -3   6    3.31    0.20 
  -4  -3   6    3.11    0.24 
  -4  -3   6    3.37    0.28 
   3   3  -6    9.90    0.43 
   3   3  -6    8.76    0.42 
  -3  -3   6    9.34    0.49 
  -3  -3   6    9.60    0.41 
   2   3  -6   12.22    0.51 
   2   3  -6   11.53    0.49 
  -2  -3   6   11.80    0.49 
  -2  -3   6   12.17    0.56 
   1   3  -6    0.12    0.05 
   1   3  -6    0.14    0.04 
  -1  -3   6    0.10    0.06 
   0   3  -6   41.12    1.59 
   0   3  -6   42.64    1.56 
   0  -3   6   42.74    1.60 
  -1   3  -6    1.15    0.13 
  -1   3  -6    1.03    0.11 
   1  -3   6    1.43    0.14 
  -2   3  -6    6.78    0.26 
  -2   3  -6    6.93    0.32 
  -2   3  -6    6.64    0.35 
  -3   3  -6    3.86    0.16 
  -3   3  -6    3.94    0.25 
  -3   3  -6    3.89    0.22 
  -4   3  -6    0.45    0.09 
  -4   3  -6    0.49    0.06 
  -4   3  -6    0.72    0.11 
  -4   3  -6    0.45    0.11 
  -5   3  -6    2.24    0.12 
  -5   3  -6    2.38    0.19 
  -5   3  -6    2.85    0.23 
  -5   3  -6    2.20    0.18 
  -6   3  -6    1.13    0.15 
  -6   3  -6    1.22    0.15 
  -6   3  -6    1.33    0.10 
  -6   3  -6    1.15    0.17 
  -7   3  -6    8.34    0.43 
  -7   3  -6    8.39    0.43 
  -7   3  -6    8.11    0.45 
  -7   3  -6    8.10    0.34 
  -8   3  -6   -0.09    0.04 
  -8   3  -6    0.06    0.08 
  -8   3  -6    0.03    0.07 
  -8   3  -6   -0.20    0.09 
  -9   3  -6    0.32    0.14 
  -9   3  -6    0.27    0.06 
  -9   3  -6    0.36    0.11 
 -10   3  -6    3.35    0.19 
 -10   3  -6    3.95    0.35 
 -10   3  -6    3.61    0.30 
   9   2  -6    3.02    0.29 
  -9  -2   6    3.33    0.27 
   8   2  -6    0.31    0.12 
  -8  -2   6    0.07    0.09 
  -8  -2   6    0.24    0.19 
  -8  -2   6    0.29    0.15 
   7   2  -6    1.91    0.22 
   7   2  -6    1.99    0.20 
  -7  -2   6    1.66    0.18 
  -7  -2   6    1.85    0.27 
  -7  -2   6    1.83    0.23 
   6   2  -6   16.02    0.70 
   6   2  -6   14.99    0.67 
  -6  -2   6   15.60    0.77 
  -6  -2   6   15.56    0.65 
  -6  -2   6   14.35    0.71 
   5   2  -6   34.81    1.34 
   5   2  -6   35.60    1.36 
  -5  -2   6   33.83    1.31 
  -5  -2   6   34.87    1.38 
  -5  -2   6   34.35    1.42 
   4   2  -6    9.67    0.45 
   4   2  -6    9.87    0.45 
  -4  -2   6    9.20    0.47 
  -4  -2   6    9.98    0.43 
  -4  -2   6    9.89    0.51 
   3   2  -6   10.35    0.47 
   3   2  -6   10.54    0.47 
  -3  -2   6   11.09    0.53 
  -3  -2   6   11.47    0.46 
   2   2  -6    0.95    0.10 
   2   2  -6    0.96    0.11 
  -2  -2   6    1.06    0.10 
  -2  -2   6    1.04    0.14 
   1   2  -6   40.93    1.51 
   1   2  -6   41.32    1.53 
  -1  -2   6   41.99    1.57 
   0   2  -6   80.51    2.74 
   0   2  -6   75.92    2.78 
   0   2  -6   76.56    2.73 
   0   2  -6   76.88    2.80 
   0  -2   6   76.32    2.81 
  -1   2  -6   16.24    0.65 
  -1   2  -6   15.54    0.63 
  -1   2  -6   15.08    0.59 
  -1   2  -6   17.06    0.58 
   1  -2   6   14.57    0.64 
  -2   2  -6    4.10    0.21 
  -2   2  -6    3.85    0.23 
  -2   2  -6    3.66    0.17 
  -3   2  -6    0.18    0.07 
  -3   2  -6    0.22    0.04 
  -3   2  -6    0.28    0.06 
  -4   2  -6    0.23    0.07 
  -4   2  -6    0.18    0.04 
  -4   2  -6    0.29    0.08 
  -4   2  -6    0.10    0.06 
  -5   2  -6   23.05    0.87 
  -5   2  -6   23.76    0.96 
  -5   2  -6   23.45    0.93 
  -5   2  -6   23.30    0.92 
  -6   2  -6   43.25    1.65 
  -6   2  -6   43.94    1.68 
  -6   2  -6   44.41    1.58 
  -6   2  -6   42.97    1.65 
  -7   2  -6   -0.03    0.06 
  -7   2  -6    0.06    0.05 
  -7   2  -6    0.00    0.08 
  -7   2  -6    0.14    0.08 
  -8   2  -6    2.36    0.24 
  -8   2  -6    2.70    0.23 
  -8   2  -6    2.34    0.16 
  -9   2  -6    9.26    0.52 
  -9   2  -6    8.36    0.39 
  -9   2  -6    9.43    0.48 
 -10   2  -6    2.74    0.25 
 -10   2  -6    2.76    0.30 
 -10   2  -6    2.43    0.18 
 -11   2  -6    0.80    0.11 
   9   1  -6    0.60    0.16 
  -9  -1   6    0.66    0.13 
  -9  -1   6    0.62    0.26 
   8   1  -6   -0.07    0.08 
  -8  -1   6    0.20    0.16 
  -8  -1   6   -0.03    0.08 
   7   1  -6    0.99    0.16 
  -7  -1   6    0.80    0.13 
  -7  -1   6    0.81    0.19 
   6   1  -6   57.45    2.19 
   6   1  -6   59.19    2.17 
  -6  -1   6   58.35    2.13 
  -6  -1   6   56.52    2.25 
   5   1  -6    1.62    0.16 
   5   1  -6    1.68    0.18 
  -5  -1   6    1.82    0.22 
  -5  -1   6    1.71    0.15 
   4   1  -6    4.87    0.29 
   4   1  -6    5.56    0.29 
  -4  -1   6    4.92    0.33 
  -4  -1   6    5.25    0.26 
   3   1  -6    7.69    0.35 
   3   1  -6    7.26    0.35 
  -3  -1   6    6.96    0.37 
  -3  -1   6    7.50    0.33 
  -3  -1   6    7.28    0.39 
   2   1  -6   11.82    0.50 
   2   1  -6   11.93    0.51 
  -2  -1   6   12.28    0.54 
  -2  -1   6   12.29    0.49 
  -2  -1   6   12.37    0.51 
   1   1  -6   10.68    0.44 
   1   1  -6   10.20    0.42 
   1   1  -6   11.26    0.45 
  -1  -1   6   10.34    0.47 
  -1  -1   6   10.72    0.45 
  -1  -1   6   11.28    0.44 
   0   1  -6   58.88    2.13 
   0   1  -6   56.08    2.09 
   0   1  -6   58.82    2.14 
   0   1  -6   62.93    2.10 
   0  -1   6   56.01    2.12 
   0  -1   6   59.42    2.14 
  -1   1  -6   84.55    3.01 
  -1   1  -6   84.75    3.02 
  -1   1  -6   77.40    2.96 
  -1   1  -6   81.87    2.98 
   1  -1   6   91.80    3.03 
  -2   1  -6   16.08    0.66 
  -2   1  -6   16.71    0.59 
  -2   1  -6   15.87    0.61 
  -2   1  -6   16.28    0.64 
  -3   1  -6   22.17    0.82 
  -3   1  -6   21.50    0.79 
  -3   1  -6   20.84    0.85 
  -3   1  -6   21.44    0.77 
  -3   1  -6   20.73    0.82 
   3  -1   6   21.75    0.84 
  -4   1  -6   25.43    0.96 
  -4   1  -6   24.94    0.93 
  -4   1  -6   24.99    0.96 
  -4   1  -6   24.89    0.99 
  -5   1  -6    7.55    0.35 
  -5   1  -6    7.13    0.31 
  -5   1  -6    7.23    0.37 
  -5   1  -6    6.82    0.34 
   5  -1   6    7.13    0.30 
  -6   1  -6    0.01    0.05 
  -6   1  -6    0.03    0.05 
  -6   1  -6   -0.03    0.09 
  -6   1  -6   -0.04    0.05 
   6  -1   6    0.02    0.04 
  -7   1  -6    0.17    0.10 
  -7   1  -6    0.01    0.06 
  -7   1  -6    0.20    0.08 
  -7   1  -6    0.15    0.06 
   7  -1   6    0.12    0.06 
  -8   1  -6    4.64    0.30 
  -8   1  -6    4.69    0.35 
  -8   1  -6    5.12    0.25 
  -9   1  -6    6.67    0.42 
  -9   1  -6    6.21    0.37 
  -9   1  -6    5.66    0.30 
 -10   1  -6    4.35    0.31 
 -10   1  -6    3.68    0.24 
 -10   1  -6    3.73    0.33 
 -11   1  -6    0.67    0.11 
 -11   1  -6    0.68    0.15 
 -11   1  -6    1.70    0.26 
   9   0  -6    0.30    0.14 
  -9   0   6    0.32    0.11 
  -9   0   6    0.05    0.17 
   8   0  -6    0.35    0.12 
  -8   0   6    0.39    0.11 
  -8   0   6    0.46    0.19 
   7   0  -6    5.16    0.34 
  -7   0   6    5.42    0.30 
  -7   0   6    5.00    0.39 
   6   0  -6    2.13    0.19 
   6   0  -6    2.27    0.22 
  -6   0   6    2.78    0.19 
  -6   0   6    2.16    0.21 
  -6   0   6    1.88    0.25 
   5   0  -6   12.17    0.54 
   5   0  -6   12.76    0.57 
  -5   0   6   11.44    0.55 
  -5   0   6   12.88    0.62 
  -5   0   6   11.96    0.52 
   4   0  -6    2.09    0.19 
   4   0  -6    2.31    0.17 
  -4   0   6    2.22    0.22 
  -4   0   6    2.17    0.16 
  -4   0   6    2.68    0.18 
   3   0  -6    0.92    0.12 
   3   0  -6    0.68    0.10 
  -3   0   6    0.81    0.14 
  -3   0   6    0.80    0.10 
  -3   0   6    0.97    0.10 
  -3   0   6    0.82    0.10 
   2   0  -6   34.26    1.25 
   2   0  -6   33.53    1.28 
   2   0  -6   35.75    1.28 
  -2   0   6   33.32    1.31 
  -2   0   6   34.13    1.26 
   1   0  -6   32.82    1.15 
   1   0  -6   28.79    1.13 
   1   0  -6   30.60    1.15 
  -1   0   6   31.41    1.16 
  -1   0   6   31.03    1.14 
   0   0  -6   44.73    1.61 
   0   0  -6   44.52    1.61 
   0   0  -6   45.61    1.63 
   0   0  -6   45.43    1.63 
   0   0   6   42.89    1.63 
   0   0   6   44.44    1.64 
   0   0   6   45.03    1.61 
  -1   0  -6    4.05    0.18 
  -1   0  -6    4.10    0.19 
  -1   0  -6    4.16    0.22 
  -1   0  -6    4.34    0.21 
   1   0   6    4.72    0.22 
   1   0   6    4.39    0.22 
  -2   0  -6    8.52    0.35 
  -2   0  -6    7.85    0.31 
  -2   0  -6    8.16    0.33 
  -2   0  -6    7.47    0.36 
   2   0   6    9.04    0.37 
  -3   0  -6    0.82    0.11 
  -3   0  -6    0.94    0.08 
  -3   0  -6    0.93    0.09 
  -3   0  -6    0.81    0.08 
   3   0   6    0.62    0.08 
  -4   0  -6    5.86    0.27 
  -4   0  -6    5.89    0.26 
  -4   0  -6    5.77    0.30 
   4   0   6    6.03    0.30 
  -5   0  -6    6.54    0.34 
  -5   0  -6    6.30    0.30 
  -5   0  -6    6.51    0.28 
  -5   0  -6    6.76    0.32 
   5   0   6    5.85    0.27 
  -6   0  -6    0.71    0.10 
  -6   0  -6    0.45    0.07 
  -6   0  -6    0.67    0.11 
  -6   0  -6    0.73    0.13 
   6   0   6    0.59    0.08 
   6   0   6    0.49    0.09 
  -7   0  -6    2.65    0.30 
  -7   0  -6    2.38    0.19 
  -7   0  -6    2.38    0.16 
  -7   0  -6    2.68    0.25 
   7   0   6    1.98    0.15 
  -8   0  -6   17.91    0.81 
  -8   0  -6   18.14    0.71 
  -8   0  -6   17.64    0.77 
   8   0   6   17.86    0.73 
  -9   0  -6    1.96    0.17 
  -9   0  -6    2.14    0.21 
  -9   0  -6    2.18    0.25 
   9   0   6    1.88    0.18 
 -10   0  -6    1.62    0.27 
 -10   0  -6    1.17    0.15 
 -10   0  -6    1.45    0.21 
  10   0   6    1.32    0.16 
 -11   0  -6    0.83    0.13 
 -11   0  -6    0.97    0.21 
 -11   0  -6    1.13    0.21 
   9  -1  -6    1.41    0.24 
  -9   1   6    1.93    0.21 
  -9   1   6    1.13    0.25 
   8  -1  -6    1.84    0.24 
  -8   1   6    1.29    0.25 
  -8   1   6    1.53    0.18 
   7  -1  -6   10.14    0.55 
  -7   1   6   10.97    0.49 
  -7   1   6   10.62    0.60 
   6  -1  -6    4.09    0.29 
  -6   1   6    3.88    0.27 
  -6   1   6    4.08    0.24 
  -6   1   6    4.19    0.33 
   5  -1  -6   38.63    1.48 
   5  -1  -6   37.81    1.45 
  -5   1   6   36.89    1.45 
  -5   1   6   37.71    1.42 
  -5   1   6   39.64    1.52 
   4  -1  -6   20.92    0.84 
   4  -1  -6   21.08    0.82 
  -4   1   6   21.08    0.82 
  -4   1   6   20.41    0.82 
  -4   1   6   20.19    0.87 
  -4   1   6   19.77    0.79 
   3  -1  -6  117.44    4.10 
   3  -1  -6  118.34    4.08 
  -3   1   6   98.24    4.10 
  -3   1   6  118.22    4.08 
  -3   1   6  107.71    4.05 
  -3   1   6  125.74    4.09 
   2  -1  -6   47.34    1.69 
   2  -1  -6   46.39    1.68 
   2  -1  -6   43.96    1.66 
  -2   1   6   44.90    1.69 
  -2   1   6   47.25    1.67 
   1  -1  -6    1.25    0.09 
   1  -1  -6    1.04    0.10 
   1  -1  -6    1.12    0.10 
  -1   1   6    1.34    0.11 
  -1   1   6    1.42    0.10 
  -1   1   6    1.20    0.11 
   0  -1  -6    1.19    0.09 
   0  -1  -6    1.21    0.09 
   0  -1  -6    1.22    0.09 
   0  -1  -6    1.30    0.10 
   0   1   6    1.27    0.10 
   0   1   6    1.50    0.11 
   0   1   6    1.19    0.09 
  -1  -1  -6    1.03    0.09 
  -1  -1  -6    1.06    0.08 
  -1  -1  -6    0.85    0.07 
  -1  -1  -6    1.06    0.09 
   1   1   6    1.09    0.09 
   1   1   6    0.84    0.08 
   1   1   6    1.03    0.08 
  -2  -1  -6    6.46    0.30 
  -2  -1  -6    6.67    0.27 
  -2  -1  -6    6.82    0.28 
  -2  -1  -6    6.80    0.29 
   2   1   6    6.87    0.30 
  -3  -1  -6   48.01    1.72 
  -3  -1  -6   48.88    1.76 
  -3  -1  -6   48.96    1.75 
  -3  -1  -6   49.37    1.72 
   3   1   6   44.84    1.75 
  -4  -1  -6   60.42    2.15 
  -4  -1  -6   57.84    2.13 
  -4  -1  -6   60.37    2.12 
  -4  -1  -6   58.82    2.17 
   4   1   6   58.69    2.11 
   4   1   6   58.88    2.16 
  -5  -1  -6    0.02    0.04 
  -5  -1  -6    0.01    0.04 
  -5  -1  -6    0.02    0.04 
  -5  -1  -6   -0.01    0.07 
   5   1   6    0.03    0.04 
   5   1   6   -0.01    0.03 
  -6  -1  -6    6.21    0.29 
  -6  -1  -6    6.38    0.32 
  -6  -1  -6    6.73    0.37 
  -6  -1  -6    6.42    0.32 
   6   1   6    6.33    0.30 
  -7  -1  -6    8.41    0.36 
  -7  -1  -6    8.11    0.40 
  -7  -1  -6    8.13    0.45 
   7   1   6    8.00    0.41 
   7   1   6    7.89    0.37 
  -8  -1  -6    2.48    0.26 
  -8  -1  -6    2.31    0.18 
  -8  -1  -6    2.52    0.21 
   8   1   6    2.66    0.19 
  -9  -1  -6    3.63    0.32 
  -9  -1  -6    3.04    0.21 
  -9  -1  -6    3.59    0.27 
   9   1   6    3.17    0.23 
 -10  -1  -6    0.08    0.13 
 -10  -1  -6    0.04    0.08 
 -10  -1  -6    0.11    0.09 
  10   1   6    0.07    0.07 
 -11  -1  -6    0.44    0.10 
 -11  -1  -6    0.26    0.17 
 -11  -1  -6    0.35    0.13 
  11   1   6    0.50    0.12 
   9  -2  -6    3.15    0.32 
  -9   2   6    3.40    0.25 
  -9   2   6    3.66    0.39 
   8  -2  -6   16.92    0.82 
  -8   2   6   17.46    0.72 
  -8   2   6   17.79    0.87 
   7  -2  -6    6.34    0.40 
  -7   2   6    6.96    0.34 
  -7   2   6    6.50    0.45 
   6  -2  -6    3.13    0.24 
  -6   2   6    2.45    0.19 
  -6   2   6    2.76    0.28 
   5  -2  -6   16.33    0.69 
  -5   2   6   14.33    0.62 
  -5   2   6   15.48    0.66 
  -5   2   6   16.82    0.65 
  -5   2   6   14.75    0.71 
   4  -2  -6   18.47    0.76 
   4  -2  -6   19.69    0.80 
  -4   2   6   18.67    0.75 
  -4   2   6   20.28    0.78 
  -4   2   6   18.83    0.74 
  -4   2   6   19.22    0.82 
   3  -2  -6   17.95    0.68 
   3  -2  -6   17.50    0.72 
   3  -2  -6   17.24    0.70 
  -3   2   6   17.41    0.68 
  -3   2   6   18.12    0.68 
  -3   2   6   16.53    0.70 
  -3   2   6   18.55    0.74 
   2  -2  -6   11.05    0.46 
   2  -2  -6   12.52    0.50 
   2  -2  -6   11.44    0.48 
  -2   2   6   11.71    0.47 
  -2   2   6   11.30    0.50 
  -2   2   6   11.91    0.46 
  -2   2   6   12.42    0.49 
   1  -2  -6   36.07    1.43 
   1  -2  -6   40.53    1.42 
   1  -2  -6   38.95    1.43 
  -1   2   6   37.98    1.44 
  -1   2   6   41.70    1.42 
  -1   2   6   39.80    1.44 
   0  -2  -6    0.39    0.06 
   0  -2  -6    0.37    0.06 
   0  -2  -6    0.45    0.05 
   0   2   6    0.41    0.06 
   0   2   6    0.42    0.06 
   0   2   6    0.44    0.06 
  -1  -2  -6   11.35    0.46 
  -1  -2  -6   11.84    0.45 
  -1  -2  -6   11.38    0.46 
   1   2   6   11.55    0.47 
   1   2   6   12.28    0.44 
   1   2   6   11.34    0.44 
  -2  -2  -6   72.79    2.45 
  -2  -2  -6   69.23    2.47 
  -2  -2  -6   65.06    2.47 
   2   2   6   69.62    2.48 
   2   2   6   68.40    2.45 
  -3  -2  -6  154.05    5.58 
  -3  -2  -6  153.65    5.56 
  -3  -2  -6  159.03    5.54 
  -3  -2  -6  158.38    5.53 
   3   2   6  161.49    5.57 
  -4  -2  -6    0.52    0.07 
  -4  -2  -6    0.54    0.06 
  -4  -2  -6    0.50    0.10 
  -4  -2  -6    0.53    0.07 
   4   2   6    0.33    0.06 
   4   2   6    0.52    0.08 
  -5  -2  -6    1.57    0.16 
  -5  -2  -6    1.35    0.12 
  -5  -2  -6    1.48    0.12 
  -5  -2  -6    1.57    0.11 
   5   2   6    1.56    0.13 
   5   2   6    1.62    0.11 
  -6  -2  -6    6.02    0.29 
  -6  -2  -6    5.75    0.34 
  -6  -2  -6    6.05    0.27 
   6   2   6    5.45    0.30 
   6   2   6    5.34    0.27 
  -7  -2  -6    4.77    0.27 
  -7  -2  -6    4.72    0.25 
  -7  -2  -6    4.60    0.33 
   7   2   6    4.53    0.25 
   7   2   6    4.67    0.28 
  -8  -2  -6    1.36    0.15 
  -8  -2  -6    1.21    0.21 
  -8  -2  -6    1.52    0.18 
   8   2   6    1.30    0.17 
   8   2   6    1.35    0.15 
  -9  -2  -6    2.18    0.22 
  -9  -2  -6    2.37    0.28 
  -9  -2  -6    2.30    0.19 
   9   2   6    2.54    0.20 
 -10  -2  -6    0.89    0.13 
 -10  -2  -6    0.14    0.15 
 -10  -2  -6    0.61    0.14 
  10   2   6    0.42    0.11 
 -11  -2  -6   17.08    0.69 
 -11  -2  -6   15.86    0.76 
 -11  -2  -6   15.10    0.80 
  11   2   6   15.70    0.73 
   9  -3  -6   11.78    0.64 
  -9   3   6   10.81    0.64 
  -9   3   6   11.75    0.52 
   8  -3  -6    6.22    0.42 
  -8   3   6    6.26    0.33 
  -8   3   6    6.83    0.47 
   7  -3  -6    0.04    0.09 
  -7   3   6   -0.04    0.06 
  -7   3   6   -0.14    0.12 
   6  -3  -6    4.54    0.32 
  -6   3   6    4.51    0.25 
  -6   3   6    4.97    0.34 
  -6   3   6    4.88    0.29 
  -6   3   6    4.36    0.29 
   5  -3  -6    0.13    0.08 
  -5   3   6    0.01    0.05 
  -5   3   6    0.06    0.06 
  -5   3   6    0.07    0.11 
  -5   3   6    0.05    0.07 
   4  -3  -6   21.49    0.87 
  -4   3   6   23.09    0.89 
  -4   3   6   21.53    0.84 
  -4   3   6   18.38    0.80 
  -4   3   6   21.66    0.80 
   3  -3  -6   58.59    2.00 
   3  -3  -6   55.08    2.01 
   3  -3  -6   54.31    2.04 
  -3   3   6   54.76    2.02 
  -3   3   6   56.49    1.98 
  -3   3   6   51.89    1.98 
   2  -3  -6  211.25    7.45 
   2  -3  -6  217.27    7.47 
   2  -3  -6  214.70    7.43 
  -2   3   6  195.73    7.41 
  -2   3   6  202.78    7.42 
  -2   3   6  205.85    7.46 
  -2   3   6  231.41    7.48 
   1  -3  -6    3.62    0.19 
   1  -3  -6    3.38    0.18 
   1  -3  -6    3.54    0.17 
  -1   3   6    3.21    0.16 
  -1   3   6    3.69    0.19 
  -1   3   6    3.43    0.19 
   0  -3  -6   15.22    0.58 
   0  -3  -6   15.39    0.61 
   0  -3  -6   16.06    0.67 
   0  -3  -6   15.35    0.59 
   0  -3  -6   16.74    0.59 
   0   3   6   14.81    0.58 
   0   3   6   16.27    0.59 
   0   3   6   15.81    0.61 
  -1  -3  -6   78.24    2.62 
  -1  -3  -6   76.22    2.62 
  -1  -3  -6   69.65    2.63 
   1   3   6   73.33    2.59 
   1   3   6   75.40    2.60 
   1   3   6   69.60    2.64 
   1   3   6   74.16    2.61 
  -2  -3  -6  140.42    4.98 
  -2  -3  -6  136.14    4.97 
  -2  -3  -6  140.41    4.99 
   2   3   6  143.54    4.96 
   2   3   6  137.51    4.99 
   2   3   6  151.76    4.99 
   2   3   6  144.20    4.95 
   2   3   6  135.38    4.95 
  -3  -3  -6  163.05    5.77 
  -3  -3  -6  163.79    5.82 
  -3  -3  -6  161.57    5.78 
   3   3   6  168.10    5.82 
   3   3   6  160.29    5.80 
   3   3   6  169.72    5.78 
  -4  -3  -6    4.20    0.20 
  -4  -3  -6    4.68    0.26 
  -4  -3  -6    4.22    0.20 
  -4  -3  -6    4.11    0.25 
   4   3   6    4.36    0.21 
   4   3   6    4.31    0.22 
  -5  -3  -6   10.99    0.46 
  -5  -3  -6   10.65    0.51 
  -5  -3  -6   11.37    0.47 
  -5  -3  -6   11.20    0.45 
   5   3   6   11.04    0.46 
   5   3   6   11.55    0.49 
  -6  -3  -6   17.06    0.77 
  -6  -3  -6   17.81    0.72 
  -6  -3  -6   18.39    0.70 
   6   3   6   17.58    0.73 
   6   3   6   18.81    0.72 
  -7  -3  -6    8.53    0.38 
  -7  -3  -6    8.84    0.42 
  -7  -3  -6    8.92    0.48 
   7   3   6    8.90    0.40 
   7   3   6    8.20    0.42 
  -8  -3  -6   12.36    0.52 
  -8  -3  -6   12.08    0.63 
  -8  -3  -6   11.90    0.56 
   8   3   6   12.36    0.54 
   8   3   6   11.85    0.56 
  -9  -3  -6    3.19    0.32 
  -9  -3  -6    3.09    0.22 
  -9  -3  -6    3.13    0.26 
   9   3   6    2.85    0.23 
   9   3   6    3.15    0.25 
 -10  -3  -6    5.43    0.36 
 -10  -3  -6    5.46    0.41 
 -10  -3  -6    5.86    0.32 
  10   3   6    5.23    0.33 
 -11  -3  -6   14.83    0.65 
 -11  -3  -6   14.77    0.72 
 -11  -3  -6   15.08    0.80 
  11   3   6   14.09    0.68 
 -12  -3  -6    0.57    0.16 
 -12  -3  -6    0.61    0.20 
 -12  -3  -6    0.30    0.12 
  12   3   6    0.49    0.13 
   9  -4  -6    0.29    0.14 
  -9   4   6    0.12    0.08 
  -9   4   6    0.17    0.15 
   8  -4  -6    9.80    0.55 
  -8   4   6   10.21    0.57 
  -8   4   6    9.43    0.43 
   7  -4  -6    4.95    0.35 
  -7   4   6    5.44    0.27 
  -7   4   6    5.89    0.39 
   6  -4  -6    3.09    0.25 
  -6   4   6    2.90    0.28 
  -6   4   6    3.25    0.24 
  -6   4   6    3.03    0.19 
  -6   4   6    3.43    0.24 
   5  -4  -6   35.88    1.42 
  -5   4   6   36.56    1.39 
  -5   4   6   35.60    1.39 
  -5   4   6   35.81    1.42 
  -5   4   6   36.88    1.33 
   4  -4  -6   58.01    2.03 
   4  -4  -6   54.91    2.08 
  -4   4   6   54.00    2.06 
  -4   4   6   57.48    2.07 
  -4   4   6   55.79    2.09 
  -4   4   6   55.23    2.01 
   3  -4  -6   25.02    0.89 
   3  -4  -6   22.79    0.93 
  -3   4   6   23.32    0.91 
  -3   4   6   22.62    0.86 
   2  -4  -6    3.03    0.19 
   2  -4  -6    3.06    0.16 
  -2   4   6    3.33    0.15 
  -2   4   6    3.21    0.18 
  -2   4   6    3.21    0.14 
  -2   4   6    3.27    0.20 
   1  -4  -6    5.90    0.25 
   1  -4  -6    5.52    0.27 
  -1   4   6    5.67    0.26 
  -1   4   6    5.81    0.27 
  -1   4   6    6.06    0.23 
  -1   4   6    5.76    0.23 
   0  -4  -6   65.08    2.23 
   0  -4  -6   63.59    2.25 
   0  -4  -6   63.42    2.24 
   0  -4  -6   62.46    2.27 
   0   4   6   63.15    2.22 
   0   4   6   64.93    2.27 
   0   4   6   62.03    2.24 
   0   4   6   61.21    2.23 
  -1  -4  -6   96.25    3.42 
  -1  -4  -6   94.73    3.39 
  -1  -4  -6   97.97    3.40 
   1   4   6   97.39    3.42 
   1   4   6  103.37    3.37 
   1   4   6   87.72    3.37 
  -2  -4  -6  110.80    3.81 
  -2  -4  -6  106.46    3.83 
  -2  -4  -6  107.53    3.83 
   2   4   6  107.12    3.83 
  -3  -4  -6   14.94    0.55 
  -3  -4  -6   16.00    0.62 
  -3  -4  -6   14.92    0.57 
   3   4   6   14.43    0.54 
   3   4   6   15.52    0.55 
   3   4   6   14.96    0.54 
   3   4   6   15.05    0.59 
  -4  -4  -6    7.99    0.33 
  -4  -4  -6    8.19    0.33 
  -4  -4  -6    8.30    0.40 
   4   4   6    8.40    0.36 
   4   4   6    8.26    0.30 
   4   4   6    8.26    0.35 
  -5  -4  -6   28.66    1.09 
  -5  -4  -6   29.64    1.15 
  -5  -4  -6   28.94    1.08 
   5   4   6   28.78    1.04 
   5   4   6   30.02    1.11 
   5   4   6   29.38    1.04 
   5   4   6   28.88    1.09 
  -6  -4  -6    8.11    0.44 
  -6  -4  -6    8.13    0.39 
  -6  -4  -6    8.79    0.37 
   6   4   6    8.38    0.40 
   6   4   6    8.66    0.38 
  -7  -4  -6    4.09    0.31 
  -7  -4  -6    3.94    0.22 
  -7  -4  -6    4.14    0.26 
   7   4   6    3.80    0.25 
   7   4   6    3.84    0.23 
  -8  -4  -6    0.06    0.11 
  -8  -4  -6   -0.04    0.08 
  -8  -4  -6    0.10    0.07 
   8   4   6    0.05    0.07 
   8   4   6   -0.02    0.06 
  -9  -4  -6    0.09    0.09 
  -9  -4  -6   -0.01    0.07 
  -9  -4  -6    0.00    0.13 
   9   4   6    0.07    0.08 
   9   4   6    0.10    0.08 
 -10  -4  -6    1.29    0.25 
 -10  -4  -6    1.76    0.23 
 -10  -4  -6    1.27    0.18 
  10   4   6    1.49    0.18 
  10   4   6    1.43    0.20 
 -11  -4  -6    4.06    0.33 
 -11  -4  -6    2.79    0.25 
 -11  -4  -6    3.15    0.36 
  11   4   6    3.29    0.27 
 -12  -4  -6    1.59    0.25 
 -12  -4  -6    1.37    0.28 
 -12  -4  -6    1.40    0.21 
  12   4   6    1.67    0.23 
   9  -5  -6    0.68    0.17 
  -9   5   6    0.92    0.20 
  -9   5   6    0.55    0.08 
   8  -5  -6    3.46    0.30 
  -8   5   6    3.54    0.31 
  -8   5   6    3.54    0.19 
   7  -5  -6   11.19    0.60 
  -7   5   6   11.79    0.58 
  -7   5   6   12.06    0.56 
  -7   5   6   11.96    0.47 
  -7   5   6   11.87    0.61 
   6  -5  -6   19.61    0.86 
  -6   5   6   20.10    0.84 
  -6   5   6   19.53    0.86 
  -6   5   6   19.28    0.74 
   5  -5  -6    3.27    0.26 
  -5   5   6    3.27    0.22 
  -5   5   6    3.50    0.26 
  -5   5   6    3.06    0.16 
  -5   5   6    2.92    0.22 
   4  -5  -6    1.78    0.13 
  -4   5   6    1.64    0.17 
  -4   5   6    1.68    0.10 
  -4   5   6    1.64    0.15 
  -4   5   6    1.60    0.15 
   3  -5  -6    8.61    0.41 
   3  -5  -6    8.13    0.36 
  -3   5   6    8.44    0.39 
  -3   5   6    8.60    0.39 
  -3   5   6    7.75    0.39 
  -3   5   6    8.50    0.32 
  -3   5   6    9.09    0.32 
   2  -5  -6   11.19    0.50 
   2  -5  -6   12.14    0.46 
  -2   5   6   11.62    0.48 
  -2   5   6   11.41    0.48 
   1  -5  -6    1.47    0.12 
   1  -5  -6    1.59    0.09 
  -1   5   6    1.45    0.10 
  -1   5   6    1.52    0.11 
   0  -5  -6   65.51    2.40 
   0  -5  -6   67.66    2.36 
   0  -5  -6   69.46    2.36 
   0   5   6   62.38    2.38 
   0   5   6   67.65    2.35 
  -1  -5  -6    3.51    0.17 
  -1  -5  -6    3.86    0.19 
  -1  -5  -6    3.79    0.16 
   1   5   6    3.56    0.18 
  -2  -5  -6   13.53    0.49 
  -2  -5  -6   11.02    0.44 
  -2  -5  -6   11.30    0.47 
   2   5   6   11.34    0.46 
  -3  -5  -6    0.28    0.04 
  -3  -5  -6    0.32    0.08 
  -3  -5  -6    0.24    0.04 
   3   5   6    0.28    0.03 
   3   5   6    0.19    0.04 
  -4  -5  -6    2.96    0.16 
  -4  -5  -6    3.26    0.15 
  -4  -5  -6    2.86    0.21 
   4   5   6    2.89    0.17 
  -5  -5  -6    8.27    0.42 
  -5  -5  -6    8.16    0.36 
  -5  -5  -6    7.93    0.34 
   5   5   6    7.97    0.37 
   5   5   6    7.99    0.36 
  -6  -5  -6    6.09    0.31 
  -6  -5  -6    5.89    0.27 
  -6  -5  -6    5.45    0.36 
   6   5   6    5.40    0.29 
   6   5   6    6.00    0.30 
  -7  -5  -6    8.90    0.50 
  -7  -5  -6    8.94    0.40 
  -7  -5  -6    9.37    0.46 
   7   5   6    9.86    0.45 
   7   5   6    9.48    0.43 
  -8  -5  -6    5.94    0.31 
  -8  -5  -6    6.59    0.37 
  -8  -5  -6    5.87    0.41 
   8   5   6    6.62    0.36 
   8   5   6    6.29    0.34 
  -9  -5  -6    1.17    0.20 
  -9  -5  -6    0.98    0.21 
  -9  -5  -6    0.95    0.13 
   9   5   6    1.22    0.17 
   9   5   6    1.47    0.17 
 -10  -5  -6    3.33    0.35 
 -10  -5  -6    2.81    0.23 
 -10  -5  -6    3.57    0.30 
  10   5   6    3.44    0.28 
  10   5   6    3.48    0.26 
 -11  -5  -6    2.19    0.27 
 -11  -5  -6    1.57    0.21 
 -11  -5  -6    1.58    0.30 
  11   5   6    2.03    0.24 
  11   5   6    1.93    0.21 
 -12  -5  -6    0.22    0.14 
 -12  -5  -6   -0.17    0.15 
 -12  -5  -6   -0.01    0.10 
  12   5   6    0.01    0.11 
   9  -6  -6    0.18    0.13 
  -9   6   6    0.31    0.17 
   8  -6  -6    4.20    0.35 
  -8   6   6    4.39    0.35 
  -8   6   6    4.67    0.46 
   7  -6  -6   -0.07    0.10 
  -7   6   6    0.07    0.08 
  -7   6   6    0.19    0.11 
   6  -6  -6    1.61    0.21 
  -6   6   6    1.39    0.17 
  -6   6   6    1.24    0.19 
   5  -6  -6    2.82    0.24 
  -5   6   6    2.86    0.23 
  -5   6   6    3.32    0.23 
   4  -6  -6    2.98    0.18 
   4  -6  -6    3.12    0.23 
  -4   6   6    2.87    0.21 
  -4   6   6    3.25    0.22 
   3  -6  -6   17.53    0.67 
   3  -6  -6   16.49    0.72 
  -3   6   6   16.45    0.70 
  -3   6   6   18.57    0.70 
  -3   6   6   17.65    0.70 
   2  -6  -6   25.81    0.98 
   2  -6  -6   26.44    0.93 
  -2   6   6   22.90    0.95 
  -2   6   6   25.79    0.96 
  -2   6   6   24.45    0.95 
   1  -6  -6   26.78    1.03 
   1  -6  -6   26.71    0.98 
  -1   6   6   28.12    1.00 
  -1   6   6   26.49    1.01 
   0  -6  -6   34.37    1.25 
   0  -6  -6   37.62    1.26 
   0  -6  -6   34.66    1.31 
   0   6   6   35.62    1.29 
   0   6   6   34.18    1.26 
  -1  -6  -6    4.88    0.21 
  -1  -6  -6    4.55    0.19 
  -1  -6  -6    4.40    0.22 
  -1  -6  -6    4.36    0.18 
   1   6   6    4.34    0.20 
   1   6   6    4.54    0.21 
  -2  -6  -6   18.99    0.75 
  -2  -6  -6   19.58    0.71 
  -2  -6  -6   19.45    0.76 
  -2  -6  -6   19.51    0.70 
   2   6   6   20.99    0.73 
   2   6   6   19.23    0.73 
  -3  -6  -6    0.11    0.06 
  -3  -6  -6    0.06    0.03 
   3   6   6    0.13    0.03 
   3   6   6    0.13    0.03 
  -4  -6  -6    3.92    0.17 
  -4  -6  -6    3.59    0.19 
  -4  -6  -6    3.56    0.24 
   4   6   6    3.88    0.20 
  -5  -6  -6  117.40    4.12 
  -5  -6  -6  115.83    4.13 
  -5  -6  -6  115.27    4.17 
   5   6   6  115.69    4.11 
   5   6   6  112.22    4.11 
  -6  -6  -6   55.70    2.05 
  -6  -6  -6   56.10    2.11 
   6   6   6   56.47    2.04 
   6   6   6   53.65    2.03 
  -7  -6  -6    5.51    0.33 
  -7  -6  -6    5.69    0.39 
   7   6   6    5.92    0.31 
   7   6   6    5.77    0.31 
  -8  -6  -6    0.28    0.14 
  -8  -6  -6    0.31    0.11 
   8   6   6    0.30    0.10 
   8   6   6    0.42    0.10 
  -9  -6  -6    8.51    0.48 
  -9  -6  -6    9.03    0.55 
   9   6   6    8.56    0.44 
   9   6   6    8.81    0.46 
 -10  -6  -6    0.11    0.16 
 -10  -6  -6    0.07    0.12 
  10   6   6    0.11    0.09 
  10   6   6    0.12    0.09 
 -11  -6  -6    0.42    0.20 
 -11  -6  -6    0.58    0.17 
  11   6   6    0.50    0.14 
  11   6   6    0.61    0.16 
   8  -7  -6    1.00    0.19 
  -8   7   6    0.83    0.15 
  -8   7   6    1.28    0.22 
   7  -7  -6    0.83    0.18 
  -7   7   6    1.31    0.19 
  -7   7   6    1.25    0.18 
   6  -7  -6   11.68    0.62 
  -6   7   6   12.99    0.61 
  -6   7   6   13.23    0.59 
   5  -7  -6    9.38    0.49 
  -5   7   6   10.27    0.49 
  -5   7   6    9.49    0.46 
   4  -7  -6    3.10    0.24 
  -4   7   6    3.30    0.22 
  -4   7   6    3.09    0.21 
   3  -7  -6    7.25    0.37 
  -3   7   6    7.55    0.35 
  -3   7   6    7.00    0.34 
   2  -7  -6   21.88    0.85 
  -2   7   6   21.02    0.81 
  -2   7   6   20.41    0.82 
   1  -7  -6    6.79    0.32 
  -1   7   6    6.00    0.29 
  -1   7   6    6.85    0.29 
  -1   7   6    6.69    0.30 
   0  -7  -6    8.90    0.38 
   0  -7  -6    8.54    0.33 
   0   7   6    8.51    0.35 
   0   7   6    8.61    0.35 
   0   7   6    8.42    0.34 
  -1  -7  -6    0.05    0.04 
  -1  -7  -6    0.20    0.05 
  -1  -7  -6    0.05    0.02 
   1   7   6    0.05    0.03 
   1   7   6    0.12    0.03 
  -2  -7  -6    2.84    0.14 
  -2  -7  -6    2.89    0.16 
  -2  -7  -6    2.72    0.17 
   2   7   6    2.51    0.14 
   2   7   6    2.67    0.13 
  -3  -7  -6   33.44    1.21 
  -3  -7  -6   32.02    1.16 
   3   7   6   30.54    1.15 
   3   7   6   30.78    1.16 
  -4  -7  -6   98.73    3.55 
  -4  -7  -6   95.88    3.60 
   4   7   6  103.63    3.54 
  -5  -7  -6   73.67    2.75 
  -5  -7  -6   77.75    2.81 
   5   7   6   78.52    2.74 
   5   7   6   74.21    2.75 
  -6  -7  -6    0.05    0.08 
  -6  -7  -6    0.16    0.11 
   6   7   6    0.13    0.06 
   6   7   6    0.12    0.06 
  -7  -7  -6    0.26    0.13 
  -7  -7  -6    0.20    0.10 
   7   7   6    0.38    0.09 
   7   7   6    0.31    0.08 
  -8  -7  -6    9.71    0.51 
  -8  -7  -6   10.25    0.57 
   8   7   6    9.85    0.47 
   8   7   6    9.47    0.47 
  -9  -7  -6    0.33    0.18 
  -9  -7  -6    0.37    0.14 
   9   7   6    0.29    0.10 
   9   7   6    0.21    0.09 
 -10  -7  -6    1.33    0.25 
 -10  -7  -6    1.46    0.27 
  10   7   6    1.56    0.20 
  10   7   6    1.81    0.22 
 -11  -7  -6    1.82    0.32 
  11   7   6    1.66    0.23 
  11   7   6    1.89    0.23 
   8  -8  -6    0.91    0.19 
  -8   8   6    0.70    0.16 
  -8   8   6    1.17    0.20 
   7  -8  -6    8.84    0.53 
  -7   8   6    9.99    0.51 
  -7   8   6    9.28    0.49 
   6  -8  -6    1.41    0.20 
  -6   8   6    1.42    0.17 
  -6   8   6    1.42    0.18 
   5  -8  -6    2.95    0.26 
  -5   8   6    3.29    0.24 
  -5   8   6    3.33    0.23 
   4  -8  -6    3.81    0.27 
  -4   8   6    3.72    0.23 
  -4   8   6    3.42    0.24 
   3  -8  -6    3.46    0.23 
  -3   8   6    3.24    0.21 
   2  -8  -6   10.29    0.47 
  -2   8   6    9.84    0.43 
  -2   8   6   10.06    0.43 
   1  -8  -6   33.38    1.26 
  -1   8   6   32.90    1.23 
  -1   8   6   32.91    1.23 
  -1   8   6   33.79    1.23 
   0  -8  -6   21.77    0.84 
   0  -8  -6   21.70    0.80 
   0   8   6   21.48    0.80 
   0   8   6   20.94    0.80 
  -1  -8  -6    1.97    0.13 
  -1  -8  -6    1.68    0.13 
  -1  -8  -6    1.78    0.11 
   1   8   6    1.63    0.10 
   1   8   6    1.84    0.10 
  -2  -8  -6   26.25    0.99 
  -2  -8  -6   25.29    0.98 
  -2  -8  -6   25.71    0.96 
   2   8   6   25.14    0.94 
   2   8   6   26.22    0.94 
  -3  -8  -6   50.41    1.79 
  -3  -8  -6   47.10    1.75 
   3   8   6   45.97    1.73 
   3   8   6   49.04    1.72 
  -4  -8  -6    1.76    0.17 
  -4  -8  -6    1.79    0.14 
   4   8   6    1.84    0.12 
  -5  -8  -6    0.65    0.12 
  -5  -8  -6    0.51    0.12 
   5   8   6    0.62    0.09 
  -6  -8  -6    8.86    0.43 
  -6  -8  -6    8.05    0.46 
   6   8   6    8.31    0.39 
   6   8   6    8.53    0.40 
  -7  -8  -6    0.22    0.11 
  -7  -8  -6    0.16    0.12 
   7   8   6    0.26    0.09 
   7   8   6    0.24    0.08 
  -8  -8  -6   10.80    0.56 
  -8  -8  -6   11.91    0.64 
   8   8   6   11.38    0.52 
   8   8   6   10.26    0.51 
  -9  -8  -6    1.54    0.27 
  -9  -8  -6    1.88    0.24 
   9   8   6    1.81    0.20 
   9   8   6    1.84    0.19 
 -10  -8  -6    5.75    0.48 
  10   8   6    4.91    0.34 
  10   8   6    5.87    0.36 
 -11  -8  -6   -0.02    0.17 
  11   8   6   -0.03    0.08 
  11   8   6    0.05    0.10 
   8  -9  -6    3.32    0.32 
  -8   9   6    3.30    0.29 
  -8   9   6    3.06    0.29 
   7  -9  -6    0.35    0.14 
  -7   9   6    0.27    0.11 
  -7   9   6    0.12    0.09 
   6  -9  -6    0.77    0.17 
  -6   9   6    1.25    0.17 
  -6   9   6    0.81    0.14 
   5  -9  -6    0.56    0.14 
  -5   9   6    0.81    0.14 
  -5   9   6    0.91    0.15 
   4  -9  -6    8.53    0.46 
  -4   9   6    8.69    0.42 
  -4   9   6    9.29    0.43 
   3  -9  -6    8.13    0.42 
  -3   9   6    8.03    0.38 
   2  -9  -6   15.49    0.66 
  -2   9   6   15.64    0.63 
  -2   9   6   15.19    0.62 
   1  -9  -6    0.79    0.12 
  -1   9   6    0.76    0.09 
  -1   9   6    0.70    0.09 
   0  -9  -6    2.55    0.16 
   0  -9  -6    3.03    0.19 
   0   9   6    2.83    0.15 
   0   9   6    2.80    0.15 
  -1  -9  -6    1.27    0.10 
  -1  -9  -6    1.19    0.12 
  -1  -9  -6    1.18    0.12 
   1   9   6    1.25    0.08 
   1   9   6    1.23    0.08 
  -2  -9  -6    3.81    0.23 
  -2  -9  -6    4.00    0.21 
  -2  -9  -6    4.21    0.22 
   2   9   6    4.09    0.18 
   2   9   6    3.84    0.17 
  -3  -9  -6    4.15    0.26 
  -3  -9  -6    4.57    0.24 
   3   9   6    4.87    0.20 
   3   9   6    4.35    0.20 
  -4  -9  -6    0.28    0.07 
  -4  -9  -6    0.32    0.10 
   4   9   6    0.23    0.05 
  -5  -9  -6    1.16    0.14 
  -5  -9  -6    1.11    0.18 
   5   9   6    1.16    0.11 
  -6  -9  -6    0.68    0.14 
  -6  -9  -6    0.56    0.12 
   6   9   6    0.59    0.11 
   6   9   6    0.77    0.10 
  -7  -9  -6    4.52    0.36 
  -7  -9  -6    4.68    0.32 
   7   9   6    4.95    0.28 
   7   9   6    4.57    0.27 
  -8  -9  -6    3.05    0.31 
  -8  -9  -6    3.00    0.28 
   8   9   6    3.39    0.23 
   8   9   6    2.95    0.23 
  -9  -9  -6    5.16    0.45 
   9   9   6    5.44    0.33 
   9   9   6    5.64    0.34 
 -10  -9  -6    0.85    0.24 
  10   9   6    0.64    0.14 
  10   9   6    0.28    0.11 
 -11  -9  -6    0.43    0.24 
  11   9   6    0.13    0.11 
  11   9   6   -0.01    0.10 
   7 -10  -6    0.83    0.19 
  -7  10   6    1.09    0.19 
  -7  10   6    1.11    0.19 
   6 -10  -6    0.81    0.17 
  -6  10   6    0.72    0.14 
  -6  10   6    0.75    0.14 
   5 -10  -6   16.11    0.75 
  -5  10   6   15.45    0.70 
  -5  10   6   16.98    0.72 
   4 -10  -6   23.67    0.99 
  -4  10   6   23.39    0.94 
  -4  10   6   23.35    0.95 
   3 -10  -6    4.33    0.28 
  -3  10   6    3.56    0.23 
  -3  10   6    3.66    0.23 
   2 -10  -6    0.03    0.06 
  -2  10   6    0.10    0.05 
  -2  10   6    0.06    0.05 
   1 -10  -6    8.21    0.40 
  -1  10   6    8.20    0.35 
  -1  10   6    7.78    0.36 
   0 -10  -6    2.09    0.17 
   0  10   6    2.14    0.12 
   0  10   6    1.81    0.12 
  -1 -10  -6    0.22    0.07 
  -1 -10  -6    0.11    0.05 
  -1 -10  -6    0.11    0.06 
   1  10   6    0.19    0.04 
   1  10   6    0.15    0.04 
  -2 -10  -6   17.82    0.71 
  -2 -10  -6   18.19    0.73 
  -2 -10  -6   17.45    0.71 
   2  10   6   17.52    0.65 
   2  10   6   17.34    0.65 
  -3 -10  -6   13.78    0.54 
  -3 -10  -6   12.27    0.53 
  -3 -10  -6   11.69    0.55 
   3  10   6   12.04    0.47 
   3  10   6   11.91    0.46 
  -4 -10  -6   10.52    0.52 
  -4 -10  -6   10.80    0.49 
   4  10   6   10.95    0.43 
  -5 -10  -6    1.77    0.18 
  -5 -10  -6    2.12    0.22 
   5  10   6    1.99    0.13 
  -6 -10  -6    7.85    0.47 
  -6 -10  -6    6.92    0.41 
   6  10   6    8.90    0.37 
  -7 -10  -6    1.78    0.25 
  -7 -10  -6    1.41    0.28 
   7  10   6    1.64    0.18 
   7  10   6    1.57    0.15 
  -8 -10  -6    0.14    0.14 
   8  10   6    0.17    0.08 
   8  10   6    0.03    0.08 
  -9 -10  -6    2.97    0.34 
   9  10   6    3.36    0.25 
   9  10   6    3.01    0.25 
 -10 -10  -6    1.20    0.28 
  10  10   6    1.22    0.19 
  10  10   6    1.11    0.18 
   6 -11  -6    3.97    0.33 
  -6  11   6    3.73    0.29 
  -6  11   6    4.20    0.30 
   5 -11  -6    1.89    0.23 
  -5  11   6    1.70    0.19 
  -5  11   6    1.59    0.18 
   4 -11  -6    0.44    0.13 
  -4  11   6    0.42    0.10 
  -4  11   6    0.44    0.10 
   3 -11  -6    9.85    0.48 
  -3  11   6    9.06    0.43 
  -3  11   6    9.32    0.45 
   2 -11  -6    8.96    0.45 
  -2  11   6    9.74    0.42 
   1 -11  -6    0.12    0.07 
  -1  11   6    0.29    0.06 
   0 -11  -6   16.08    0.68 
   0  11   6   16.44    0.62 
  -1 -11  -6   16.14    0.67 
  -1 -11  -6   15.48    0.71 
  -1 -11  -6   16.85    0.68 
   1  11   6   16.26    0.60 
  -2 -11  -6    3.74    0.24 
  -2 -11  -6    3.99    0.26 
  -2 -11  -6    4.45    0.24 
   2  11   6    4.14    0.18 
   2  11   6    4.00    0.17 
  -3 -11  -6    0.33    0.08 
  -3 -11  -6    0.17    0.08 
  -3 -11  -6    0.23    0.07 
   3  11   6    0.24    0.06 
   3  11   6    0.21    0.04 
  -4 -11  -6    1.74    0.17 
  -4 -11  -6    1.78    0.20 
   4  11   6    1.80    0.11 
  -5 -11  -6    3.34    0.29 
   5  11   6    4.02    0.20 
  -6 -11  -6    5.85    0.40 
   6  11   6    5.39    0.28 
  -7 -11  -6    2.71    0.30 
   7  11   6    2.57    0.19 
  -8 -11  -6    2.33    0.31 
   8  11   6    2.70    0.23 
   8  11   6    2.81    0.22 
  -9 -11  -6    1.29    0.26 
   9  11   6    1.34    0.18 
   9  11   6    1.47    0.19 
 -10 -11  -6    0.04    0.18 
  10  11   6    0.25    0.11 
  10  11   6    0.26    0.11 
   6 -12  -6    1.15    0.21 
  -6  12   6    1.25    0.19 
  -6  12   6    1.64    0.21 
   5 -12  -6    0.02    0.10 
  -5  12   6    0.09    0.08 
  -5  12   6    0.05    0.08 
   4 -12  -6   18.05    0.80 
  -4  12   6   16.99    0.75 
  -4  12   6   17.20    0.73 
   3 -12  -6    9.24    0.49 
  -3  12   6    9.19    0.46 
  -3  12   6   10.05    0.44 
   2 -12  -6    2.24    0.21 
  -2  12   6    2.35    0.17 
   1 -12  -6   19.10    0.78 
  -1  12   6   17.81    0.71 
   0 -12  -6    7.76    0.38 
   0  12   6    7.28    0.32 
  -1 -12  -6    6.63    0.34 
  -1 -12  -6    6.23    0.34 
   1  12   6    6.77    0.27 
  -2 -12  -6    0.49    0.11 
  -2 -12  -6    0.24    0.08 
  -2 -12  -6    0.44    0.11 
   2  12   6    0.44    0.05 
   2  12   6    0.48    0.06 
  -3 -12  -6    2.23    0.22 
  -3 -12  -6    2.30    0.18 
   3  12   6    2.17    0.11 
  -4 -12  -6    0.07    0.09 
   4  12   6    0.10    0.04 
  -5 -12  -6   14.17    0.70 
   5  12   6   14.26    0.56 
  -6 -12  -6   10.20    0.57 
   6  12   6    9.65    0.43 
  -7 -12  -6    0.16    0.15 
   7  12   6    0.22    0.07 
  -8 -12  -6    0.33    0.18 
   8  12   6    0.38    0.09 
  -9 -12  -6    4.97    0.46 
   9  12   6    4.53    0.32 
   9  12   6    4.85    0.31 
   5 -13  -6    1.15    0.20 
  -5  13   6    1.29    0.18 
   4 -13  -6    0.18    0.12 
  -4  13   6    0.37    0.10 
   3 -13  -6    0.57    0.14 
  -3  13   6    0.70    0.12 
   2 -13  -6    4.46    0.30 
  -2  13   6    4.26    0.24 
   1 -13  -6    0.90    0.15 
  -1  13   6    0.84    0.10 
   0 -13  -6    5.24    0.31 
   0  13   6    5.10    0.24 
  -1 -13  -6    0.90    0.13 
   1  13   6    0.76    0.07 
  -2 -13  -6   -0.10    0.05 
   2  13   6    0.05    0.02 
  -3 -13  -6    0.59    0.13 
  -3 -13  -6    0.33    0.09 
   3  13   6    0.42    0.05 
  -4 -13  -6    7.85    0.38 
  -4 -13  -6    7.79    0.45 
   4  13   6    6.78    0.30 
  -5 -13  -6    6.00    0.42 
   5  13   6    6.29    0.28 
  -6 -13  -6    0.73    0.18 
   6  13   6    0.64    0.10 
  -7 -13  -6   -0.06    0.13 
   7  13   6    0.06    0.06 
  -8 -13  -6    0.75    0.23 
   8  13   6    0.58    0.11 
  -3  14   6    0.38    0.09 
   2 -14  -6    4.71    0.32 
  -2  14   6    4.75    0.26 
   1 -14  -6    1.93    0.20 
  -1  14   6    1.82    0.13 
   0 -14  -6    6.01    0.35 
   0  14   6    6.01    0.26 
   0  14   6    6.02    0.26 
  -1 -14  -6    0.37    0.10 
   1  14   6    0.38    0.05 
  -2 -14  -6    3.01    0.23 
  -3 -14  -6    6.83    0.37 
  -4 -14  -6    2.56    0.21 
  -4 -14  -6    2.25    0.26 
   4  14   6    2.72    0.13 
  -5 -14  -6    1.57    0.17 
  -5 -14  -6    2.33    0.28 
   5  14   6    1.75    0.12 
  -6 -14  -6   -0.10    0.11 
   6  14   6    0.03    0.05 
  -7 -14  -6    0.25    0.17 
   7  14   6    0.28    0.08 
  -2  15   6    2.28    0.17 
  -1  15   6    3.44    0.19 
   0  15   6    0.23    0.05 
   0  15   6    0.23    0.05 
  -1 -15  -6    0.54    0.12 
  -2 -15  -6    1.85    0.20 
  -3 -15  -6    6.56    0.36 
  -4 -15  -6    3.34    0.25 
  -5 -15  -6    0.47    0.16 
  -5 -15  -6    0.79    0.13 
   5  15   6    0.81    0.08 
   2   9  -7    0.83    0.14 
   1   9  -7    4.24    0.28 
   0   9  -7    2.38    0.21 
  -1   9  -7    3.21    0.24 
  -2   9  -7    0.74    0.13 
  -3   9  -7    0.34    0.11 
   4   8  -7    2.39    0.23 
  -4  -8   7    3.01    0.32 
   3   8  -7    1.42    0.18 
  -3  -8   7    1.37    0.36 
   2   8  -7    1.42    0.18 
  -2  -8   7    1.40    0.23 
   1   8  -7    1.58    0.18 
  -1  -8   7    2.29    0.28 
   0   8  -7    0.23    0.09 
   0  -8   7    0.19    0.12 
  -1   8  -7    1.84    0.19 
   1  -8   7    2.05    0.25 
  -2   8  -7    0.46    0.11 
   2  -8   7    0.66    0.15 
  -3   8  -7    1.12    0.20 
  -3   8  -7    1.02    0.16 
   3  -8   7    1.01    0.18 
  -4   8  -7    5.40    0.33 
  -4   8  -7    5.49    0.40 
   4  -8   7    4.45    0.36 
  -5   8  -7    3.78    0.29 
  -5   8  -7    3.67    0.34 
   5   7  -7    2.10    0.22 
  -5  -7   7    1.95    0.28 
   4   7  -7    0.17    0.09 
  -4  -7   7    0.17    0.13 
  -4  -7   7   -0.03    0.11 
   3   7  -7    0.29    0.09 
  -3  -7   7    0.16    0.13 
   2   7  -7    0.26    0.09 
  -2  -7   7    0.15    0.12 
   1   7  -7    6.38    0.33 
  -1  -7   7    5.21    0.39 
   0   7  -7   14.33    0.63 
   0  -7   7   14.90    0.73 
  -1   7  -7    0.23    0.08 
   1  -7   7    0.09    0.10 
  -2   7  -7    4.59    0.29 
  -2   7  -7    5.20    0.36 
   2  -7   7    4.93    0.35 
  -3   7  -7    8.36    0.48 
  -3   7  -7    7.66    0.41 
   3  -7   7    7.96    0.47 
  -4   7  -7    0.23    0.13 
  -4   7  -7   -0.07    0.06 
  -5   7  -7    0.30    0.14 
  -5   7  -7    0.12    0.10 
  -6   7  -7   -0.02    0.09 
  -6   7  -7   -0.01    0.12 
  -7   7  -7    0.11    0.10 
  -7   7  -7   -0.02    0.13 
   6   6  -7    2.95    0.26 
  -6  -6   7    3.15    0.33 
   5   6  -7   12.15    0.56 
  -5  -6   7   11.13    0.67 
  -5  -6   7   11.75    0.66 
   4   6  -7    3.19    0.24 
  -4  -6   7    2.74    0.31 
  -4  -6   7    3.08    0.30 
   3   6  -7    4.90    0.30 
  -3  -6   7    4.52    0.36 
   2   6  -7   22.10    0.89 
  -2  -6   7   21.20    0.98 
   1   6  -7    4.16    0.26 
  -1  -6   7    3.87    0.31 
   0   6  -7    1.51    0.16 
   0  -6   7    1.73    0.21 
  -1   6  -7    1.58    0.16 
   1  -6   7    1.60    0.20 
  -2   6  -7    0.14    0.07 
  -2   6  -7   -0.04    0.09 
   2  -6   7    0.25    0.11 
  -3   6  -7    0.78    0.17 
  -3   6  -7    0.85    0.13 
   3  -6   7    0.88    0.16 
  -4   6  -7    9.30    0.52 
  -4   6  -7    9.78    0.47 
  -5   6  -7    0.75    0.13 
  -5   6  -7    1.29    0.21 
  -6   6  -7    0.00    0.08 
  -6   6  -7    0.26    0.14 
  -7   6  -7    5.78    0.38 
  -7   6  -7    6.68    0.43 
  -7   6  -7    5.49    0.37 
  -8   6  -7   10.76    0.61 
  -8   6  -7   10.07    0.56 
   7   5  -7    6.71    0.40 
  -7  -5   7    6.03    0.46 
   6   5  -7   12.35    0.59 
  -6  -5   7   11.85    0.66 
  -6  -5   7   12.36    0.71 
   5   5  -7    0.00    0.07 
  -5  -5   7    0.02    0.13 
  -5  -5   7   -0.03    0.09 
   4   5  -7    5.43    0.32 
  -4  -5   7    5.60    0.41 
  -4  -5   7    5.46    0.37 
   3   5  -7   22.58    0.91 
  -3  -5   7   21.85    1.00 
   2   5  -7    0.69    0.11 
  -2  -5   7    0.94    0.17 
   1   5  -7    2.64    0.20 
  -1  -5   7    2.77    0.24 
   0   5  -7    1.48    0.15 
   0  -5   7    1.41    0.19 
  -1   5  -7    1.98    0.16 
  -1   5  -7    1.60    0.18 
   1  -5   7    1.88    0.20 
  -2   5  -7   10.46    0.47 
  -2   5  -7    9.90    0.51 
   2  -5   7   10.10    0.52 
  -3   5  -7   31.09    1.24 
  -3   5  -7   29.49    1.17 
  -4   5  -7   13.32    0.61 
  -4   5  -7   14.18    0.66 
  -5   5  -7    5.33    0.36 
  -5   5  -7    6.21    0.34 
  -6   5  -7   10.37    0.56 
  -6   5  -7   10.31    0.52 
  -6   5  -7   10.31    0.51 
  -7   5  -7    1.49    0.20 
  -7   5  -7    1.67    0.24 
  -7   5  -7    1.39    0.20 
  -8   5  -7    0.67    0.16 
  -8   5  -7    0.70    0.15 
  -8   5  -7    0.96    0.20 
   7   4  -7    0.02    0.10 
   7   4  -7    0.07    0.09 
  -7  -4   7   -0.06    0.15 
  -7  -4   7   -0.03    0.12 
   6   4  -7    1.42    0.19 
  -6  -4   7    1.09    0.20 
  -6  -4   7    1.20    0.24 
   5   4  -7    1.36    0.17 
  -5  -4   7    1.74    0.22 
  -5  -4   7    1.41    0.22 
   4   4  -7    2.04    0.18 
  -4  -4   7    1.72    0.21 
  -4  -4   7    1.97    0.25 
   3   4  -7    0.66    0.11 
  -3  -4   7    0.82    0.16 
   2   4  -7   10.54    0.48 
  -2  -4   7   10.38    0.54 
   1   4  -7    1.18    0.13 
  -1  -4   7    1.30    0.17 
   0   4  -7    7.65    0.36 
   0  -4   7    6.80    0.39 
  -1   4  -7    4.97    0.27 
  -1   4  -7    4.82    0.31 
   1  -4   7    4.52    0.30 
  -2   4  -7   15.74    0.68 
  -2   4  -7   15.20    0.63 
   2  -4   7   14.28    0.66 
  -3   4  -7    2.59    0.23 
  -3   4  -7    2.36    0.18 
  -4   4  -7    4.45    0.31 
  -4   4  -7    4.42    0.27 
  -5   4  -7    0.05    0.07 
  -5   4  -7    0.14    0.11 
  -5   4  -7    0.00    0.07 
  -6   4  -7    0.24    0.09 
  -6   4  -7    0.15    0.11 
  -6   4  -7    0.19    0.09 
  -7   4  -7    0.04    0.08 
  -7   4  -7    0.02    0.08 
  -7   4  -7    0.10    0.11 
  -8   4  -7    0.34    0.12 
  -8   4  -7    0.43    0.12 
  -8   4  -7    0.51    0.16 
  -9   4  -7    2.49    0.28 
  -9   4  -7    2.51    0.25 
   8   3  -7    0.14    0.11 
  -8  -3   7    0.16    0.09 
   7   3  -7    0.55    0.14 
   7   3  -7    0.17    0.10 
  -7  -3   7    0.41    0.11 
  -7  -3   7    0.29    0.16 
  -7  -3   7    0.91    0.19 
   6   3  -7    0.65    0.13 
   6   3  -7    0.58    0.13 
  -6  -3   7    0.66    0.12 
  -6  -3   7    0.25    0.16 
  -6  -3   7    0.57    0.15 
   5   3  -7    0.81    0.13 
   5   3  -7    1.03    0.15 
  -5  -3   7    0.76    0.18 
  -5  -3   7    0.64    0.11 
  -5  -3   7    0.65    0.15 
   4   3  -7   14.58    0.63 
   4   3  -7   14.74    0.63 
  -4  -3   7   14.30    0.71 
  -4  -3   7   14.65    0.60 
  -4  -3   7   13.20    0.66 
   3   3  -7    3.38    0.22 
   3   3  -7    3.51    0.22 
  -3  -3   7    3.13    0.20 
  -3  -3   7    3.20    0.27 
   2   3  -7    5.14    0.28 
  -2  -3   7    5.26    0.26 
  -2  -3   7    5.37    0.33 
   1   3  -7   11.06    0.48 
  -1  -3   7   10.76    0.53 
   0   3  -7   28.73    1.10 
   0  -3   7   28.37    1.14 
  -1   3  -7    1.89    0.15 
  -1   3  -7    2.15    0.19 
   1  -3   7    2.10    0.18 
  -2   3  -7    0.36    0.09 
  -2   3  -7    0.47    0.07 
  -2   3  -7    0.50    0.09 
   2  -3   7    0.63    0.11 
  -3   3  -7    9.15    0.46 
  -3   3  -7    9.14    0.35 
  -3   3  -7    9.24    0.42 
  -4   3  -7    2.10    0.12 
  -4   3  -7    2.70    0.19 
  -4   3  -7    2.23    0.21 
  -5   3  -7    0.20    0.09 
  -5   3  -7    0.26    0.05 
  -5   3  -7    0.23    0.08 
  -5   3  -7    0.16    0.08 
  -6   3  -7   10.72    0.43 
  -6   3  -7   10.69    0.54 
  -6   3  -7   11.29    0.52 
  -6   3  -7   10.62    0.51 
  -7   3  -7   13.53    0.53 
  -7   3  -7   13.78    0.63 
  -7   3  -7   13.19    0.65 
  -7   3  -7   13.69    0.62 
  -8   3  -7    2.53    0.26 
  -8   3  -7    2.20    0.14 
  -8   3  -7    2.37    0.22 
  -9   3  -7    0.02    0.05 
  -9   3  -7    0.03    0.09 
  -9   3  -7    0.06    0.13 
 -10   3  -7    1.59    0.27 
 -10   3  -7    1.69    0.13 
   8   2  -7    2.40    0.26 
  -8  -2   7    2.47    0.36 
  -8  -2   7    2.16    0.22 
   7   2  -7    0.00    0.09 
  -7  -2   7   -0.03    0.07 
  -7  -2   7   -0.06    0.14 
   6   2  -7   26.39    1.05 
   6   2  -7   27.37    1.08 
  -6  -2   7   25.68    1.02 
  -6  -2   7   23.51    1.13 
  -6  -2   7   24.74    1.08 
   5   2  -7   23.86    1.00 
   5   2  -7   25.17    0.99 
  -5  -2   7   23.74    1.07 
  -5  -2   7   24.15    0.96 
  -5  -2   7   24.59    1.03 
   4   2  -7    0.28    0.11 
   4   2  -7    0.25    0.09 
  -4  -2   7    0.49    0.09 
  -4  -2   7    0.29    0.09 
  -4  -2   7    0.37    0.13 
   3   2  -7    0.45    0.09 
   3   2  -7    0.46    0.09 
  -3  -2   7    0.27    0.11 
  -3  -2   7    0.38    0.08 
   2   2  -7    3.58    0.20 
   2   2  -7    2.98    0.21 
  -2  -2   7    3.41    0.25 
  -2  -2   7    3.38    0.19 
   1   2  -7    5.99    0.27 
   1   2  -7    6.07    0.30 
  -1  -2   7    6.07    0.33 
  -1  -2   7    5.70    0.28 
   0   2  -7    0.20    0.06 
   0   2  -7    0.08    0.06 
   0  -2   7    0.21    0.08 
  -1   2  -7   68.41    2.45 
  -1   2  -7   64.48    2.40 
  -1   2  -7   70.15    2.48 
   1  -2   7   67.07    2.47 
  -2   2  -7    2.50    0.17 
  -2   2  -7    2.24    0.13 
  -2   2  -7    2.64    0.20 
   2  -2   7    2.38    0.18 
  -3   2  -7    0.18    0.06 
  -3   2  -7    0.24    0.05 
  -3   2  -7    0.32    0.09 
  -4   2  -7    5.89    0.30 
  -4   2  -7    5.67    0.25 
  -4   2  -7    5.27    0.31 
  -4   2  -7    5.48    0.29 
  -5   2  -7   33.15    1.26 
  -5   2  -7   32.25    1.28 
  -5   2  -7   32.03    1.19 
  -5   2  -7   32.65    1.25 
  -6   2  -7    3.82    0.24 
  -6   2  -7    4.01    0.26 
  -6   2  -7    3.62    0.19 
  -6   2  -7    3.42    0.27 
  -7   2  -7    0.30    0.12 
  -7   2  -7    0.30    0.09 
  -7   2  -7    0.38    0.10 
  -7   2  -7    0.28    0.07 
  -8   2  -7    0.12    0.12 
  -8   2  -7    0.25    0.07 
  -8   2  -7    0.19    0.10 
  -9   2  -7    8.73    0.47 
  -9   2  -7    8.02    0.37 
  -9   2  -7    8.99    0.52 
 -10   2  -7    3.15    0.27 
 -10   2  -7    3.00    0.20 
 -10   2  -7    3.10    0.33 
   8   1  -7    2.15    0.25 
  -8  -1   7    2.26    0.22 
  -8  -1   7    2.34    0.35 
   7   1  -7    1.93    0.22 
  -7  -1   7    2.00    0.30 
  -7  -1   7    1.44    0.17 
   6   1  -7   26.15    1.11 
   6   1  -7   27.28    1.09 
  -6  -1   7   26.89    1.18 
  -6  -1   7   27.05    1.06 
   5   1  -7    0.22    0.09 
   5   1  -7    0.22    0.09 
  -5  -1   7    0.28    0.08 
  -5  -1   7    0.37    0.14 
   4   1  -7    0.62    0.11 
   4   1  -7    0.78    0.12 
  -4  -1   7    0.78    0.15 
  -4  -1   7    0.72    0.11 
   3   1  -7   11.08    0.50 
  -3  -1   7   10.99    0.55 
  -3  -1   7   11.88    0.48 
   2   1  -7    4.66    0.25 
   2   1  -7    4.45    0.25 
  -2  -1   7    4.94    0.29 
  -2  -1   7    5.10    0.25 
   1   1  -7    6.19    0.29 
   1   1  -7    6.27    0.27 
   1   1  -7    6.38    0.31 
  -1  -1   7    6.21    0.33 
   0   1  -7   36.37    1.27 
   0   1  -7   34.41    1.30 
   0   1  -7   32.07    1.26 
   0   1  -7   34.48    1.31 
   0  -1   7   36.26    1.32 
  -1   1  -7   61.96    2.11 
  -1   1  -7   57.25    2.17 
  -1   1  -7   61.63    2.16 
  -1   1  -7   56.36    2.12 
  -2   1  -7   30.56    1.11 
  -2   1  -7   29.61    1.16 
  -2   1  -7   29.55    1.14 
  -2   1  -7   28.79    1.08 
   2  -1   7   32.85    1.19 
  -3   1  -7   25.65    1.01 
  -3   1  -7   25.37    0.99 
  -3   1  -7   26.01    0.95 
  -4   1  -7    4.77    0.28 
  -4   1  -7    4.22    0.23 
  -4   1  -7    4.26    0.21 
  -4   1  -7    4.72    0.25 
  -5   1  -7    1.60    0.14 
  -5   1  -7    1.48    0.18 
  -5   1  -7    1.34    0.11 
  -5   1  -7    1.58    0.15 
  -6   1  -7    5.35    0.29 
  -6   1  -7    5.51    0.31 
  -6   1  -7    5.34    0.34 
  -6   1  -7    5.44    0.26 
  -7   1  -7   -0.04    0.06 
  -7   1  -7   -0.04    0.05 
  -7   1  -7   -0.03    0.06 
  -7   1  -7    0.06    0.10 
  -8   1  -7    0.43    0.08 
  -8   1  -7    0.64    0.15 
  -8   1  -7    0.65    0.12 
  -9   1  -7   21.28    0.84 
  -9   1  -7   22.25    0.93 
  -9   1  -7   21.56    0.97 
 -10   1  -7    0.70    0.14 
 -10   1  -7    0.45    0.10 
 -10   1  -7    0.52    0.17 
 -11   1  -7    0.16    0.08 
 -11   1  -7    0.23    0.16 
   9   0  -7    4.23    0.36 
  -9   0   7    3.81    0.29 
   8   0  -7    1.22    0.20 
  -8   0   7    1.53    0.19 
  -8   0   7    1.20    0.25 
   7   0  -7    4.11    0.32 
  -7   0   7    4.19    0.39 
  -7   0   7    4.45    0.28 
   6   0  -7    0.18    0.09 
  -6   0   7    0.12    0.15 
  -6   0   7    0.18    0.08 
   5   0  -7   26.38    1.08 
   5   0  -7   25.66    1.06 
  -5   0   7   26.95    1.07 
  -5   0   7   26.79    1.03 
  -5   0   7   27.42    1.14 
   4   0  -7   36.83    1.37 
   4   0  -7   34.27    1.34 
  -4   0   7   34.53    1.35 
  -4   0   7   36.30    1.41 
  -4   0   7   34.24    1.32 
   3   0  -7   25.76    1.01 
   3   0  -7   25.86    1.02 
  -3   0   7   25.83    1.01 
  -3   0   7   25.85    0.98 
  -3   0   7   26.05    1.06 
   2   0  -7   12.69    0.55 
   2   0  -7   14.20    0.53 
  -2   0   7   13.94    0.54 
  -2   0   7   12.96    0.55 
  -2   0   7   12.79    0.59 
   1   0  -7   41.63    1.49 
   1   0  -7   38.58    1.47 
   1   0  -7   40.22    1.50 
  -1   0   7   39.44    1.48 
  -1   0   7   42.69    1.51 
   0   0  -7    1.48    0.12 
   0   0  -7    1.56    0.11 
   0   0  -7    1.52    0.12 
   0   0  -7    1.69    0.11 
   0   0   7    1.72    0.12 
   0   0   7    1.33    0.12 
   0   0   7    1.83    0.13 
  -1   0  -7   20.33    0.80 
  -1   0  -7   20.80    0.77 
  -1   0  -7   21.23    0.81 
  -1   0  -7   20.49    0.78 
   1   0   7   21.39    0.81 
   1   0   7   20.08    0.80 
  -2   0  -7   11.11    0.51 
  -2   0  -7   12.33    0.48 
  -2   0  -7   12.53    0.46 
  -2   0  -7   11.80    0.50 
   2   0   7   12.55    0.50 
   2   0   7   12.11    0.51 
  -3   0  -7    0.08    0.03 
  -3   0  -7    0.12    0.06 
  -3   0  -7    0.00    0.03 
  -3   0  -7    0.12    0.05 
   3   0   7    0.19    0.06 
  -4   0  -7   25.41    0.98 
  -4   0  -7   26.00    0.97 
  -4   0  -7   26.00    1.01 
  -4   0  -7   25.66    0.95 
   4   0   7   24.06    0.99 
  -5   0  -7    0.23    0.07 
  -5   0  -7    0.33    0.07 
  -5   0  -7    0.32    0.09 
  -5   0  -7    0.27    0.06 
   5   0   7    0.21    0.06 
  -6   0  -7   10.53    0.47 
  -6   0  -7   10.68    0.44 
  -6   0  -7   10.68    0.52 
  -6   0  -7   10.15    0.48 
   6   0   7   10.68    0.43 
  -7   0  -7    7.71    0.35 
  -7   0  -7    7.84    0.43 
  -7   0  -7    7.98    0.39 
   7   0   7    7.33    0.34 
  -8   0  -7    6.12    0.31 
  -8   0  -7    6.64    0.35 
  -8   0  -7    6.27    0.40 
   8   0   7    6.27    0.40 
  -9   0  -7    0.61    0.10 
  -9   0  -7    0.83    0.17 
  -9   0  -7    0.52    0.12 
 -10   0  -7    1.89    0.21 
 -10   0  -7    1.98    0.18 
 -10   0  -7    1.64    0.27 
 -11   0  -7    1.02    0.14 
 -11   0  -7    1.17    0.20 
 -11   0  -7    1.04    0.22 
   9  -1  -7    1.35    0.23 
  -9   1   7    1.09    0.16 
   8  -1  -7    4.37    0.35 
  -8   1   7    5.19    0.43 
  -8   1   7    4.06    0.28 
   7  -1  -7   19.65    0.89 
  -7   1   7   20.24    0.82 
  -7   1   7   19.32    0.93 
   6  -1  -7    7.30    0.42 
  -6   1   7    7.57    0.47 
  -6   1   7    7.26    0.37 
   5  -1  -7    5.45    0.33 
  -5   1   7    5.54    0.29 
  -5   1   7    5.99    0.39 
   4  -1  -7   38.58    1.50 
   4  -1  -7   39.67    1.48 
  -4   1   7   36.90    1.44 
  -4   1   7   39.79    1.53 
  -4   1   7   39.94    1.47 
   3  -1  -7  101.88    3.66 
   3  -1  -7  101.54    3.65 
  -3   1   7  101.55    3.62 
  -3   1   7  101.10    3.69 
  -3   1   7  100.07    3.64 
  -3   1   7  102.69    3.65 
   2  -1  -7    2.07    0.14 
   2  -1  -7    2.21    0.15 
   2  -1  -7    2.23    0.16 
  -2   1   7    1.88    0.14 
   1  -1  -7    0.90    0.09 
   1  -1  -7    0.65    0.09 
  -1   1   7    0.76    0.09 
  -1   1   7    0.77    0.10 
  -1   1   7    0.79    0.09 
   0  -1  -7    1.31    0.10 
   0  -1  -7    1.26    0.10 
   0  -1  -7    1.47    0.11 
   0  -1  -7    1.42    0.11 
   0   1   7    1.23    0.11 
   0   1   7    1.27    0.11 
   0   1   7    1.30    0.10 
  -1  -1  -7    1.57    0.12 
  -1  -1  -7    1.79    0.11 
  -1  -1  -7    1.86    0.13 
  -1  -1  -7    1.69    0.11 
   1   1   7    1.80    0.13 
   1   1   7    2.33    0.13 
   1   1   7    1.83    0.12 
  -2  -1  -7   10.73    0.43 
  -2  -1  -7   10.88    0.46 
  -2  -1  -7   10.88    0.44 
  -2  -1  -7   11.04    0.47 
   2   1   7   11.22    0.47 
   2   1   7   11.44    0.45 
  -3  -1  -7   35.14    1.27 
  -3  -1  -7   36.02    1.32 
  -3  -1  -7   32.51    1.28 
  -3  -1  -7   35.39    1.30 
   3   1   7   36.53    1.32 
  -4  -1  -7   19.31    0.73 
  -4  -1  -7   18.08    0.75 
  -4  -1  -7   19.64    0.72 
  -4  -1  -7   19.19    0.77 
  -5  -1  -7   23.99    0.91 
  -5  -1  -7   23.64    0.97 
  -5  -1  -7   24.35    0.94 
  -5  -1  -7   24.41    0.90 
   5   1   7   23.82    0.95 
   5   1   7   23.54    0.89 
  -6  -1  -7    4.28    0.29 
  -6  -1  -7    4.73    0.23 
  -6  -1  -7    4.60    0.25 
  -6  -1  -7    4.99    0.31 
   6   1   7    4.49    0.27 
   6   1   7    4.62    0.23 
  -7  -1  -7    5.84    0.31 
  -7  -1  -7    5.97    0.28 
  -7  -1  -7    5.38    0.35 
   7   1   7    5.81    0.28 
  -8  -1  -7    7.82    0.37 
  -8  -1  -7    8.15    0.46 
  -8  -1  -7    8.40    0.41 
   8   1   7    8.16    0.39 
  -9  -1  -7    0.23    0.13 
  -9  -1  -7    0.27    0.10 
  -9  -1  -7    0.20    0.08 
   9   1   7    0.20    0.08 
 -10  -1  -7    1.95    0.28 
 -10  -1  -7    1.76    0.18 
 -10  -1  -7    1.76    0.21 
  10   1   7    1.74    0.18 
 -11  -1  -7    0.06    0.15 
 -11  -1  -7    0.05    0.08 
 -11  -1  -7    0.15    0.11 
   9  -2  -7   10.87    0.62 
  -9   2   7   12.09    0.94 
  -9   2   7   10.21    0.51 
   8  -2  -7   18.95    0.91 
  -8   2   7   19.26    0.94
[truncated: 710,060 more chars]
